# Supplementary material for: Bisindolines from the reaction of 3,5-dimethoxyaniline with vicinal diones
Source: Royal Society of Chemistry journal article supplement (doi:10.1039/c3ra45350b), 2013-11-29
Supplement: c3ra45350b.pdf [file c3ra45350b.pdf]

# Bisindolines from the Reaction of 3,5-Dimethoxyaniline with Vicinal Diones

*James Kovach, William W. Brennessel, and William D. Jones\**

Department of Chemistry, University of Rochester, Rochester, New York 14627

## Supporting Information

### Table of Contents

---

|                    |                                                                                            |      |
|--------------------|--------------------------------------------------------------------------------------------|------|
| <b>Figure S1.</b>  | $^1\text{H}$ NMR spectrum of (+/-)- <b>1</b> .                                             | S-5  |
| <b>Figure S2.</b>  | $^{13}\text{C}\{^1\text{H}\}$ NMR spectrum of (+/-)- <b>1</b> .                            | S-6  |
| <b>Figure S3.</b>  | $^{13}\text{C}$ NMR spectrum of (+/-)- <b>1</b> .                                          | S-7  |
| <b>Figure S4.</b>  | $^{13}\text{C}\{^1\text{H}\}$ and $^{13}\text{C}$ NMR spectra overlay of (+/-)- <b>1</b> . | S-8  |
| <b>Figure S5.</b>  | $^1\text{H}$ - $^{13}\text{C}$ HSQC NMR spectrum of (+/-)- <b>1</b> .                      | S-9  |
| <b>Figure S6.</b>  | $^1\text{H}$ NMR spectrum of <b>2</b> .                                                    | S-10 |
| <b>Figure S7.</b>  | $^1\text{H}$ - $^1\text{H}$ COSY NMR spectrum of <b>2</b> .                                | S-11 |
| <b>Figure S8.</b>  | $^{13}\text{C}\{^1\text{H}\}$ NMR spectrum of <b>2</b> .                                   | S-12 |
| <b>Figure S9.</b>  | $^{13}\text{C}$ NMR spectrum of <b>2</b> .                                                 | S-13 |
| <b>Figure S10.</b> | $^{13}\text{C}\{^1\text{H}\}$ and $^{13}\text{C}$ NMR spectra overlay of <b>2</b> .        | S-14 |
| <b>Figure S11.</b> | $^1\text{H}$ - $^{13}\text{C}$ HSQC NMR spectrum of <b>2</b> .                             | S-15 |
| <b>Figure S12.</b> | $^1\text{H}$ NMR spectrum of <b>3</b> .                                                    | S-16 |
| <b>Figure S13.</b> | $^{13}\text{C}\{^1\text{H}\}$ NMR spectrum of <b>3</b> .                                   | S-17 |
| <b>Figure S14.</b> | $^{13}\text{C}$ NMR spectrum of <b>3</b> .                                                 | S-18 |
| <b>Figure S15.</b> | $^{13}\text{C}\{^1\text{H}\}$ and $^{13}\text{C}$ NMR spectra overlay of <b>3</b> .        | S-19 |
| <b>Figure S16.</b> | $^1\text{H}$ - $^{13}\text{C}$ HSQC NMR spectrum of <b>3</b> .                             | S-20 |
| <b>Figure S17.</b> | $^1\text{H}$ NMR spectrum of (+/-)- <b>4</b> .                                             | S-21 |
| <b>Figure S18.</b> | $^{13}\text{C}\{^1\text{H}\}$ NMR spectrum of (+/-)- <b>4</b> .                            | S-22 |
| <b>Figure S19.</b> | $^{13}\text{C}$ NMR spectrum of (+/-)- <b>4</b> .                                          | S-23 |
| <b>Figure S20.</b> | $^{13}\text{C}\{^1\text{H}\}$ and $^{13}\text{C}$ NMR spectra overlay of (+/-)- <b>4</b> . | S-24 |
| <b>Figure S21.</b> | $^1\text{H}$ - $^{13}\text{C}$ HSQC NMR spectrum of (+/-)- <b>4</b> .                      | S-25 |
| <b>Figure S22.</b> | $^1\text{H}$ NMR spectrum of <b>5</b> .                                                    | S-26 |
| <b>Figure S23.</b> | $^1\text{H}$ - $^1\text{H}$ COSY NMR spectrum of <b>5</b> .                                | S-27 |
| <b>Figure S24.</b> | $^{13}\text{C}\{^1\text{H}\}$ NMR spectrum of <b>5</b> .                                   | S-28 |
| <b>Figure S25.</b> | $^{13}\text{C}$ NMR spectrum of <b>5</b> .                                                 | S-29 |
| <b>Figure S26.</b> | $^{13}\text{C}\{^1\text{H}\}$ and $^{13}\text{C}$ NMR spectra overlay of <b>5</b> .        | S-30 |
| <b>Figure S27.</b> | $^1\text{H}$ - $^{13}\text{C}$ HSQC NMR spectrum of <b>5</b> .                             | S-31 |
| <b>Figure S28.</b> | $^1\text{H}$ NMR spectrum of <b>6a</b> , <b>6b</b> .                                       | S-32 |
| <b>Figure S29.</b> | $^1\text{H}$ - $^1\text{H}$ COSY NMR spectrum of <b>6a</b> , <b>6b</b> .                   | S-33 |
| <b>Figure S30.</b> | $^1\text{H}$ VT NMR spectra of <b>6a</b> , <b>6b</b> .                                     | S-34 |
| <b>Figure S31.</b> | $^{13}\text{C}\{^1\text{H}\}$ NMR spectrum of <b>6a</b> , <b>6b</b> .                      | S-35 |

|                    |                                                                                                          |      |
|--------------------|----------------------------------------------------------------------------------------------------------|------|
| <b>Figure S32.</b> | $^{13}\text{C}$ NMR spectrum of <b>6a</b> , <b>6b</b> .                                                  | S-36 |
| <b>Figure S33.</b> | $^{13}\text{C}\{^1\text{H}\}$ and $^{13}\text{C}$ NMR spectra overlay of <b>6a</b> , <b>6b</b> .         | S-37 |
| <b>Figure S34.</b> | $^1\text{H}$ - $^{13}\text{C}$ HSQC NMR spectrum of <b>6a</b> , <b>6b</b> .                              | S-38 |
| <b>Figure S35.</b> | $^1\text{H}$ NMR spectrum of (+/-)- <b>7</b> .                                                           | S-39 |
| <b>Figure S36.</b> | $^1\text{H}$ - $^1\text{H}$ COSY NMR spectrum of (+/-)- <b>7</b> .                                       | S-40 |
| <b>Figure S37.</b> | $^{13}\text{C}\{^1\text{H}\}$ NMR spectrum of (+/-)- <b>7</b> .                                          | S-41 |
| <b>Figure S38.</b> | $^{13}\text{C}$ NMR spectrum of (+/-)- <b>7</b> .                                                        | S-42 |
| <b>Figure S39.</b> | $^{13}\text{C}\{^1\text{H}\}$ and $^{13}\text{C}$ NMR spectra overlay of (+/-)- <b>7</b> .               | S-43 |
| <b>Figure S40.</b> | $^1\text{H}$ - $^{13}\text{C}$ HSQC NMR spectrum of (+/-)- <b>7</b> .                                    | S-44 |
| <b>Figure S41.</b> | $^1\text{H}$ NMR spectrum of (+/-)- <b>8</b> .                                                           | S-45 |
| <b>Figure S42.</b> | $^1\text{H}$ - $^1\text{H}$ COSY NMR spectrum of (+/-)- <b>8</b> .                                       | S-46 |
| <b>Figure S43.</b> | $^{13}\text{C}\{^1\text{H}\}$ NMR spectrum of (+/-)- <b>8</b> .                                          | S-47 |
| <b>Figure S44.</b> | $^{13}\text{C}$ NMR spectrum of (+/-)- <b>8</b> .                                                        | S-48 |
| <b>Figure S45.</b> | $^{13}\text{C}\{^1\text{H}\}$ and $^{13}\text{C}$ NMR spectra overlay of (+/-)- <b>8</b> .               | S-49 |
| <b>Figure S46.</b> | $^1\text{H}$ - $^{13}\text{C}$ HSQC NMR spectrum of (+/-)- <b>8</b> .                                    | S-50 |
| <b>Figure S47.</b> | ORTEP diagram of <b>1</b> [ <i>Pbca</i> ].                                                               | S-51 |
| <b>Figure S48.</b> | ORTEP diagram of <b>1</b> [ <i>Pbca</i> ] intermolecular and intramolecular hydrogen bonding.            | S-51 |
|                    | Experimental details for the structure determination of (+/-)- <b>1</b> [ <i>Pbca</i> ].                 | S-52 |
| <b>Table S1.</b>   | Crystal data and structure refinement for (+/-)- <b>1</b> [ <i>Pbca</i> ].                               | S-53 |
| <b>Table S2.</b>   | Atomic coordinates and equivalent isotropic displacement parameters for (+/-)- <b>1</b> [ <i>Pbca</i> ]. | S-54 |
| <b>Table S3.</b>   | Bond lengths and angles for (+/-)- <b>1</b> [ <i>Pbca</i> ].                                             | S-55 |
| <b>Table S4.</b>   | Anisotropic displacement parameters for (+/-)- <b>1</b> [ <i>Pbca</i> ].                                 | S-57 |
| <b>Table S5.</b>   | Hydrogen coordinates and isotropic displacement parameters for (+/-)- <b>1</b> [ <i>Pbca</i> ].          | S-58 |
| <b>Table S6.</b>   | Torsion angles for (+/-)- <b>1</b> [ <i>Pbca</i> ].                                                      | S-59 |
| <b>Table S7.</b>   | Hydrogen bonds and close contacts for (+/-)- <b>1</b> [ <i>Pbca</i> ].                                   | S-60 |
| <b>Figure S49.</b> | ORTEP diagram of <b>1(a)</b> [ <i>P-1</i> ].                                                             | S-61 |
| <b>Figure S50.</b> | ORTEP diagram of <b>1(b)</b> [ <i>P-1</i> ].                                                             | S-61 |
|                    | Experimental details for the structure determination of (+/-)- <b>1</b> [ <i>P-1</i> ].                  | S-62 |
| <b>Table S8.</b>   | Crystal data and structure refinement for (+/-)- <b>1</b> [ <i>P-1</i> ].                                | S-63 |
| <b>Table S9.</b>   | Atomic coordinates and equivalent isotropic displacement parameters for (+/-)- <b>1</b> [ <i>P-1</i> ].  | S-64 |
| <b>Table S10.</b>  | Bond lengths and angles for (+/-)- <b>1</b> [ <i>P-1</i> ].                                              | S-66 |
| <b>Table S11.</b>  | Anisotropic displacement parameters for (+/-)- <b>1</b> [ <i>P-1</i> ].                                  | S-70 |
| <b>Table S12.</b>  | Hydrogen coordinates and isotropic displacement parameters for (+/-)- <b>1</b> [ <i>P-1</i> ].           | S-72 |
| <b>Table S13.</b>  | Torsion angles for (+/-)- <b>1</b> [ <i>P-1</i> ].                                                       | S-74 |
| <b>Table S14.</b>  | Hydrogen bonds and close contacts for (+/-)- <b>1</b> [ <i>P-1</i> ].                                    | S-76 |
| <b>Figure S51.</b> | ORTEP diagram of <b>2</b> .                                                                              | S-77 |
|                    | Experimental details for the structure determination of <b>2</b> .                                       | S-78 |
| <b>Table S15.</b>  | Crystal data and structure refinement for <b>2</b> .                                                     | S-79 |
| <b>Table S16.</b>  | Atomic coordinates and equivalent isotropic displacement parameters for <b>2</b> .                       | S-80 |

|                                                                                                                     |                                                                                                                                     |       |
|---------------------------------------------------------------------------------------------------------------------|-------------------------------------------------------------------------------------------------------------------------------------|-------|
| <b>Table S17.</b>                                                                                                   | Bond lengths and angles for <b>2</b> .                                                                                              | S-81  |
| <b>Table S18.</b>                                                                                                   | Anisotropic displacement parameters for <b>2</b> .                                                                                  | S-83  |
| <b>Table S19.</b>                                                                                                   | Hydrogen coordinates and isotropic displacement parameters for <b>2</b> .                                                           | S-84  |
| <b>Table S20.</b>                                                                                                   | Torsion angles for <b>2</b> .                                                                                                       | S-85  |
| <b>Figure S52.</b>                                                                                                  | ORTEP diagram of <b>3</b> [ <i>P</i> -1].                                                                                           | S-86  |
| <b>Figure S53.</b>                                                                                                  | ORTEP diagram of <b>3</b> [ <i>P</i> -1] asymmetric unit.                                                                           | S-86  |
| <b>Figure S54.</b>                                                                                                  | ORTEP diagram of <b>3</b> [ <i>P</i> -1] showing intermolecular hydrogen bonding.                                                   | S-87  |
| Experimental details for the structure determination of <b>3</b> [ <i>P</i> -1].                                    |                                                                                                                                     | S-88  |
| <b>Table S21.</b>                                                                                                   | Crystal data and structure refinement for <b>3</b> [ <i>P</i> -1].                                                                  | S-89  |
| <b>Table S22.</b>                                                                                                   | Atomic coordinates and equivalent isotropic displacement parameters for <b>3</b> [ <i>P</i> -1].                                    | S-90  |
| <b>Table S23.</b>                                                                                                   | Bond lengths and angles for <b>3</b> [ <i>P</i> -1].                                                                                | S-92  |
| <b>Table S24.</b>                                                                                                   | Anisotropic displacement parameters for <b>3</b> [ <i>P</i> -1].                                                                    | S-96  |
| <b>Table S25.</b>                                                                                                   | Hydrogen coordinates and isotropic displacement parameters for <b>3</b> [ <i>P</i> -1].                                             | S-98  |
| <b>Table S26.</b>                                                                                                   | Torsion angles for <b>3</b> [ <i>P</i> -1].                                                                                         | S-100 |
| <b>Table S27.</b>                                                                                                   | Hydrogen bonds and close contacts for <b>3</b> [ <i>P</i> -1].                                                                      | S-102 |
| <b>Figure S55.</b>                                                                                                  | ORTEP diagram of <b>3</b> [ <i>P</i> <sub>2</sub> <sub>1</sub> / <i>c</i> ].                                                        | S-103 |
| <b>Figure S56.</b>                                                                                                  | ORTEP diagram of <b>3</b> [ <i>P</i> <sub>2</sub> <sub>1</sub> / <i>c</i> ] asymmetric unit.                                        | S-103 |
| <b>Figure S57.</b>                                                                                                  | ORTEP diagram of <b>3</b> [ <i>P</i> <sub>2</sub> <sub>1</sub> / <i>c</i> ] showing intermolecular hydrogen bonding.                | S-104 |
| Experimental details for the structure determination of <b>3</b> [ <i>P</i> <sub>2</sub> <sub>1</sub> / <i>c</i> ]. |                                                                                                                                     | S-105 |
| <b>Table S28.</b>                                                                                                   | Crystal data and structure refinement for <b>3</b> [ <i>P</i> <sub>2</sub> <sub>1</sub> / <i>c</i> ].                               | S-106 |
| <b>Table S29.</b>                                                                                                   | Atomic coordinates and equivalent isotropic displacement parameters for <b>3</b> [ <i>P</i> <sub>2</sub> <sub>1</sub> / <i>c</i> ]. | S-107 |
| <b>Table S30.</b>                                                                                                   | Bond lengths and angles for <b>3</b> [ <i>P</i> <sub>2</sub> <sub>1</sub> / <i>c</i> ].                                             | S-109 |
| <b>Table S31.</b>                                                                                                   | Anisotropic displacement parameters for <b>3</b> [ <i>P</i> <sub>2</sub> <sub>1</sub> / <i>c</i> ].                                 | S-113 |
| <b>Table S32.</b>                                                                                                   | Hydrogen coordinates and isotropic displacement parameters for <b>3</b> [ <i>P</i> <sub>2</sub> <sub>1</sub> / <i>c</i> ].          | S-115 |
| <b>Table S33.</b>                                                                                                   | Torsion angles for <b>3</b> [ <i>P</i> <sub>2</sub> <sub>1</sub> / <i>c</i> ].                                                      | S-117 |
| <b>Table S34.</b>                                                                                                   | Hydrogen bonds and close contacts for <b>3</b> [ <i>P</i> <sub>2</sub> <sub>1</sub> / <i>c</i> ].                                   | S-118 |
| <b>Figure S58.</b>                                                                                                  | ORTEP diagram of <b>4</b> .                                                                                                         | S-119 |
| <b>Figure S59.</b>                                                                                                  | ORTEP diagram of (+/-)- <b>4</b> showing intermolecular and intramolecular H-bonding.                                               | S-119 |
| Experimental details for the structure determination of (+/-)- <b>4</b> .                                           |                                                                                                                                     | S-120 |
| <b>Table S35.</b>                                                                                                   | Crystal data and structure refinement for (+/-)- <b>4</b> .                                                                         | S-121 |
| <b>Table S36.</b>                                                                                                   | Atomic coordinates and equivalent isotropic displacement parameters for (+/-)- <b>4</b> .                                           | S-122 |
| <b>Table S37.</b>                                                                                                   | Bond lengths and angles for (+/-)- <b>4</b> .                                                                                       | S-124 |
| <b>Table S38.</b>                                                                                                   | Anisotropic displacement parameters for (+/-)- <b>4</b> .                                                                           | S-127 |
| <b>Table S39.</b>                                                                                                   | Hydrogen coordinates and isotropic displacement parameters for (+/-)- <b>4</b> .                                                    | S-129 |
| <b>Table S40.</b>                                                                                                   | Torsion angles for (+/-)- <b>4</b> .                                                                                                | S-130 |
| <b>Table S41.</b>                                                                                                   | Hydrogen bonds and close contacts for (+/-)- <b>4</b> .                                                                             | S-131 |
| <b>Figure S60.</b>                                                                                                  | ORTEP diagram of <b>5</b> .                                                                                                         | S-132 |
| <b>Figure S61.</b>                                                                                                  | ORTEP diagram of <b>5</b> showing intermolecular hydrogen bonding.                                                                  | S-132 |
| Experimental details for the structure determination of <b>5</b> .                                                  |                                                                                                                                     | S-133 |

|                    |                                                                                           |       |
|--------------------|-------------------------------------------------------------------------------------------|-------|
| <b>Table S42.</b>  | Crystal data and structure refinement for <b>5</b> .                                      | S-135 |
| <b>Table S43.</b>  | Atomic coordinates and equivalent isotropic displacement parameters for <b>5</b> .        | S-136 |
| <b>Table S44.</b>  | Bond lengths and angles for <b>5</b> .                                                    | S-137 |
| <b>Table S45.</b>  | Anisotropic displacement parameters for <b>5</b> .                                        | S-139 |
| <b>Table S46.</b>  | Hydrogen coordinates and isotropic displacement parameters for <b>5</b> .                 | S-140 |
| <b>Table S47.</b>  | Torsion angles for <b>5</b> .                                                             | S-141 |
| <b>Table S48.</b>  | Hydrogen bonds and close contacts for <b>5</b> .                                          | S-141 |
| <b>Figure S62.</b> | ORTEP diagram of <b>6b</b> .                                                              | S-142 |
|                    | Experimental details for the structure determination of <b>6b</b> .                       | S-143 |
| <b>Table S49.</b>  | Crystal data and structure refinement for <b>6b</b> .                                     | S-144 |
| <b>Table S50.</b>  | Atomic coordinates and equivalent isotropic displacement parameters for <b>6b</b> .       | S-145 |
| <b>Table S51.</b>  | Bond lengths and angles for <b>6b</b> .                                                   | S-146 |
| <b>Table S52.</b>  | Anisotropic displacement parameters for <b>6b</b> .                                       | S-148 |
| <b>Table S53.</b>  | Hydrogen coordinates and isotropic displacement parameters for <b>6b</b> .                | S-149 |
| <b>Table S54.</b>  | Torsion angles for <b>6b</b> .                                                            | S-150 |
| <b>Figure S63.</b> | ORTEP diagram of <b>7</b> .                                                               | S-151 |
| <b>Figure S64.</b> | ORTEP diagram of <b>7</b> asymmetric unit.                                                | S-151 |
| <b>Figure S65.</b> | ORTEP diagram of (+/-)- <b>7</b> showing intermolecular hydrogen bonding.                 | S-152 |
|                    | Experimental details for the structure determination of (+/-)- <b>7</b> .                 | S-153 |
| <b>Table S55.</b>  | Crystal data and structure refinement for (+/-)- <b>7</b> .                               | S-154 |
| <b>Table S56.</b>  | Atomic coordinates and equivalent isotropic displacement parameters for (+/-)- <b>7</b> . | S-155 |
| <b>Table S57.</b>  | Bond lengths and angles for (+/-)- <b>7</b> .                                             | S-157 |
| <b>Table S58.</b>  | Anisotropic displacement parameters for (+/-)- <b>7</b> .                                 | S-161 |
| <b>Table S59.</b>  | Hydrogen coordinates and isotropic displacement parameters for (+/-)- <b>7</b> .          | S-163 |
| <b>Table S60.</b>  | Torsion angles for (+/-)- <b>7</b> .                                                      | S-165 |
| <b>Table S61.</b>  | Hydrogen bonds and close contacts for (+/-)- <b>7</b> .                                   | S-167 |
| <b>Figure S66.</b> | ORTEP diagram of <b>8</b> .                                                               | S-168 |
| <b>Figure S67.</b> | ORTEP diagram of <b>8</b> asymmetric unit.                                                | S-168 |
|                    | Experimental details for the structure determination of (+/-)- <b>8</b> .                 | S-169 |
| <b>Table S62.</b>  | Crystal data and structure refinement for (+/-)- <b>8</b> .                               | S-171 |
| <b>Table S63.</b>  | Atomic coordinates and equivalent isotropic displacement parameters for (+/-)- <b>8</b> . | S-172 |
| <b>Table S64.</b>  | Bond lengths and angles for (+/-)- <b>8</b> .                                             | S-175 |
| <b>Table S65.</b>  | Anisotropic displacement parameters for (+/-)- <b>8</b> .                                 | S-182 |
| <b>Table S66.</b>  | Hydrogen coordinates and isotropic displacement parameters for (+/-)- <b>8</b> .          | S-185 |
| <b>Table S67.</b>  | Torsion angles for (+/-)- <b>8</b> .                                                      | S-188 |
| <b>Table S68.</b>  | Hydrogen bonds and close contacts for (+/-)- <b>8</b> .                                   | S-191 |

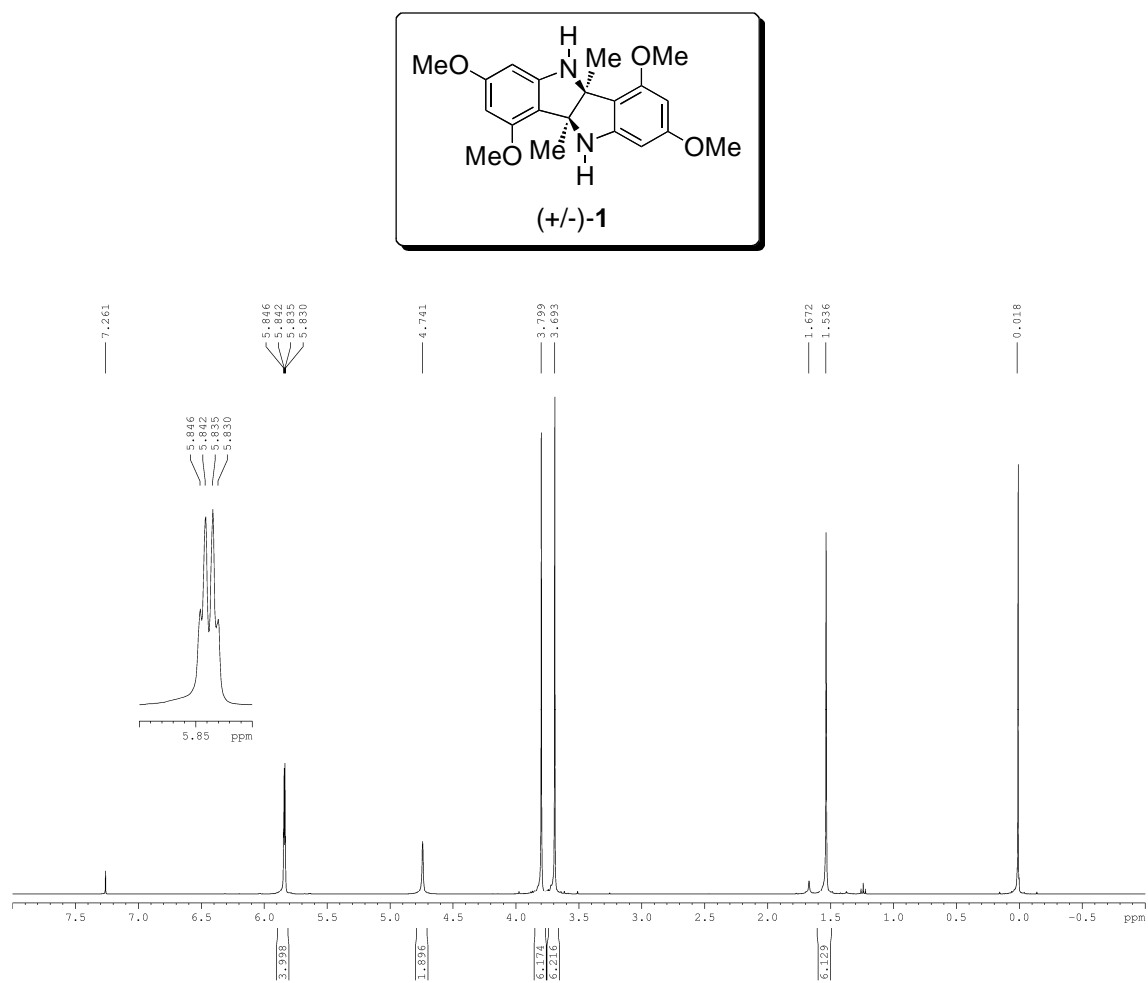

**Figure S1.**  $^1\text{H}$  NMR spectrum of (+/-)-1 (400 MHz,  $\text{CDCl}_3$ , 25 °C).

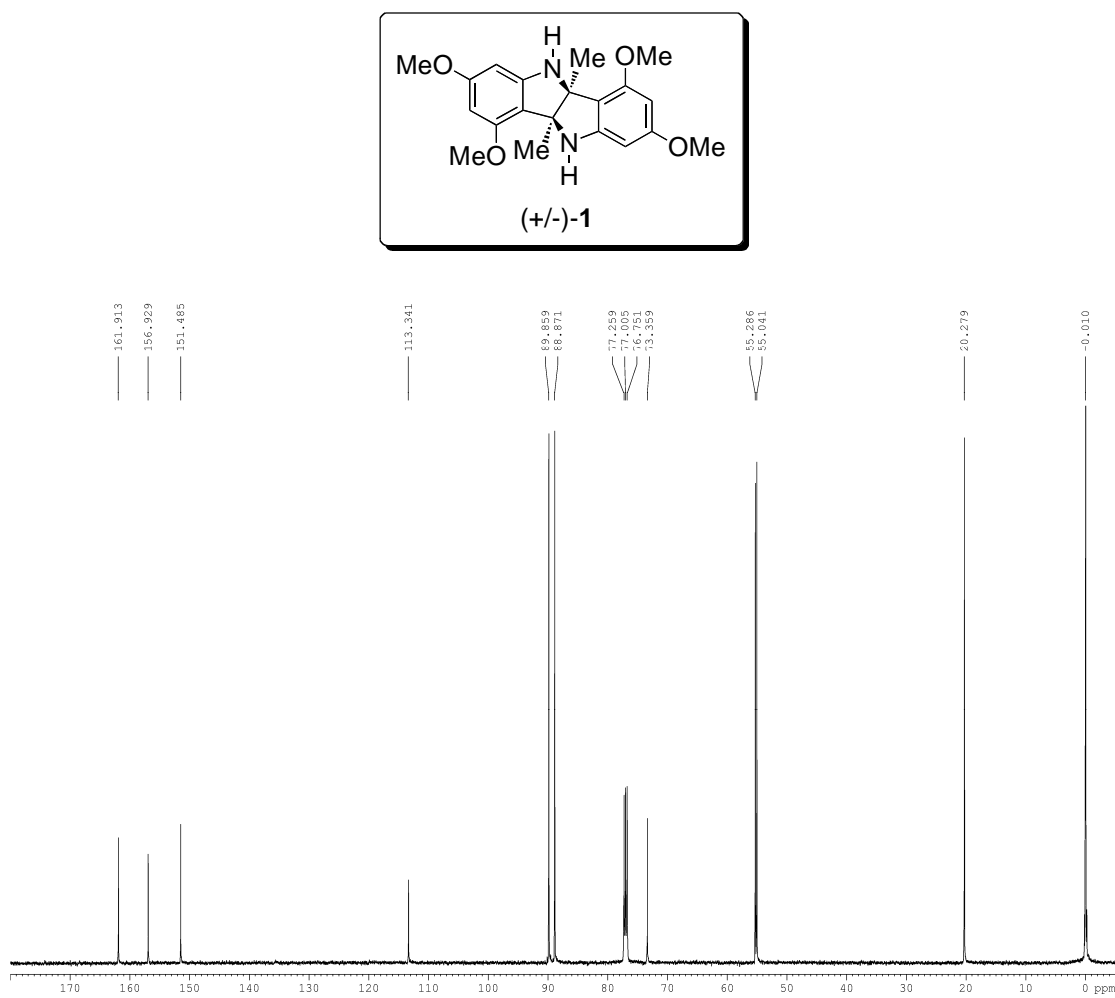

**Figure S2.** <sup>13</sup>C{<sup>1</sup>H} NMR spectrum of (+/-)-1 (125 MHz, CDCl<sub>3</sub>, 25 °C).

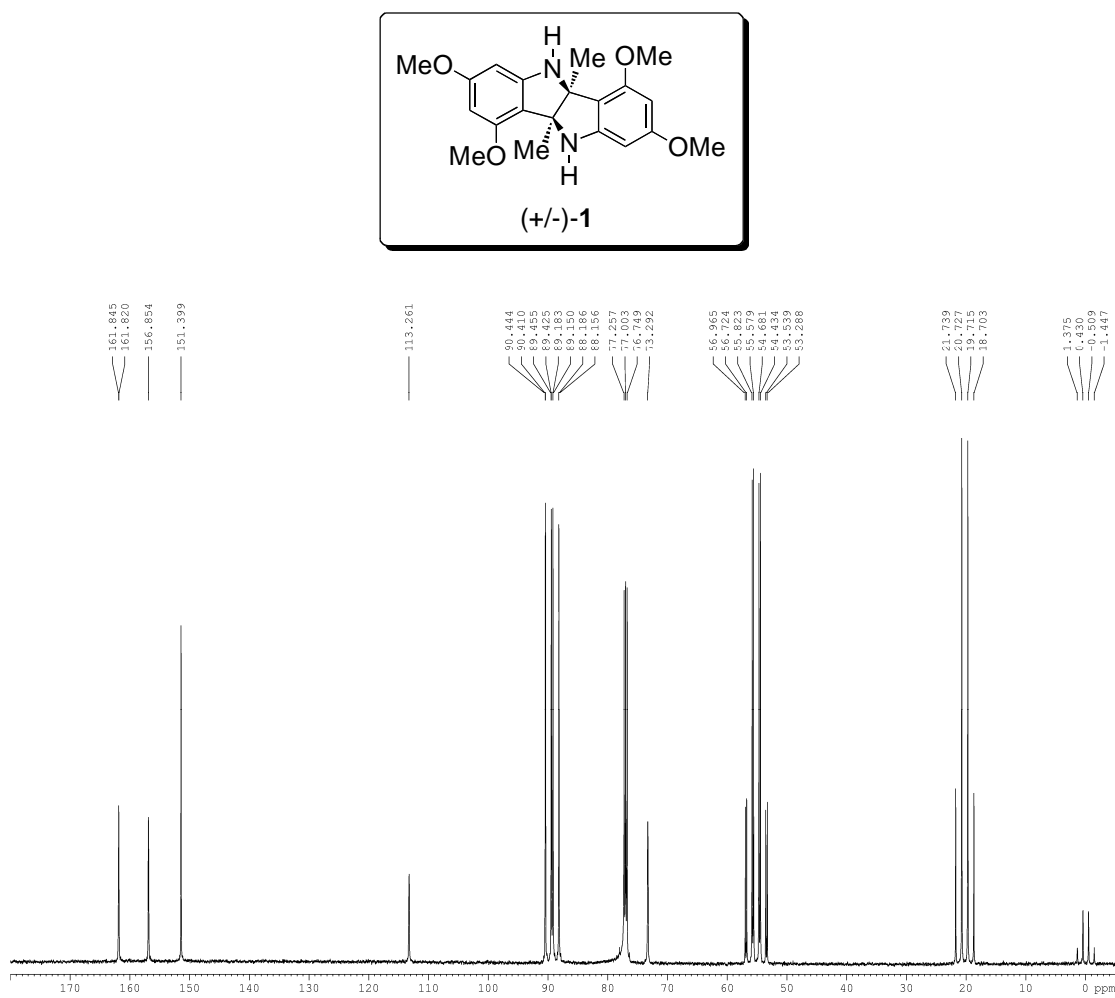

**Figure S3.** <sup>13</sup>C NMR spectrum of (+/-)-1 (125 MHz, CDCl<sub>3</sub>, 25 °C).

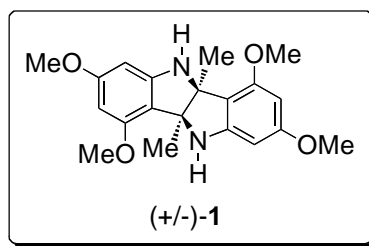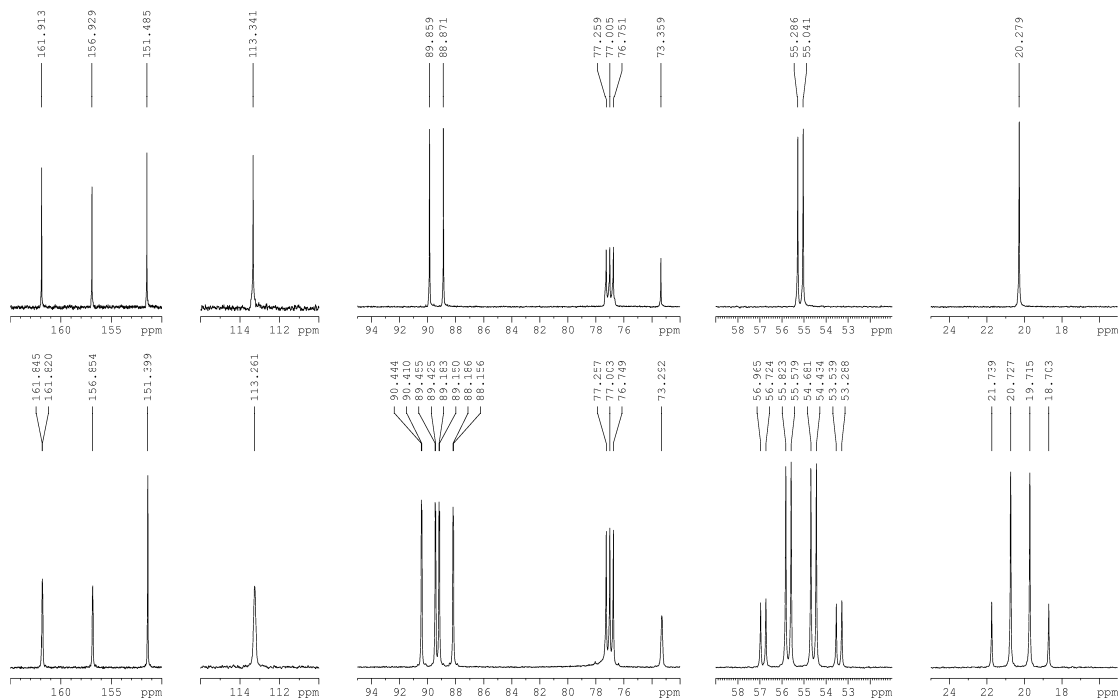

**Figure S4.**  $^{13}\text{C}\{^1\text{H}\}$  and  $^{13}\text{C}$  NMR spectra overlay of (+/-)-1 (125 MHz,  $\text{CDCl}_3$ , 25 °C). Peak heights are normalized to emphasize splitting.



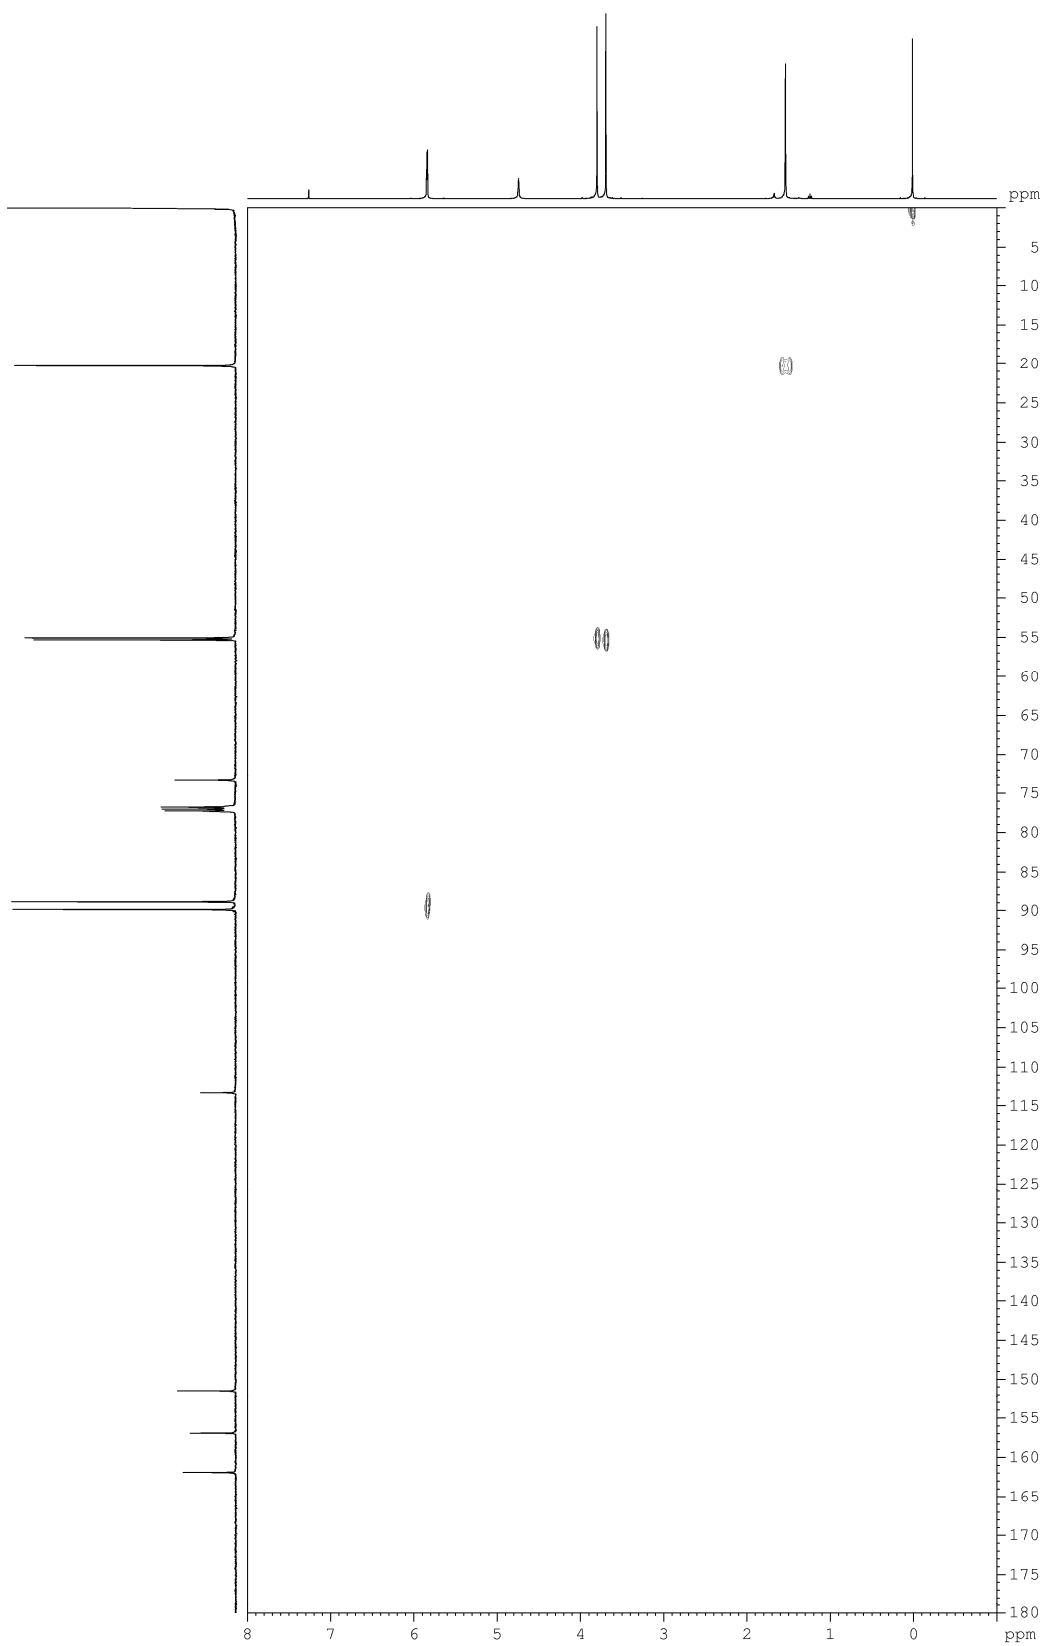

**Figure S5.**  $^1\text{H}$ - $^{13}\text{C}$  HSQC NMR spectrum of (+/-)-1 (125 MHz,  $\text{CDCl}_3$ , 25 °C).

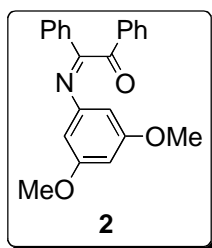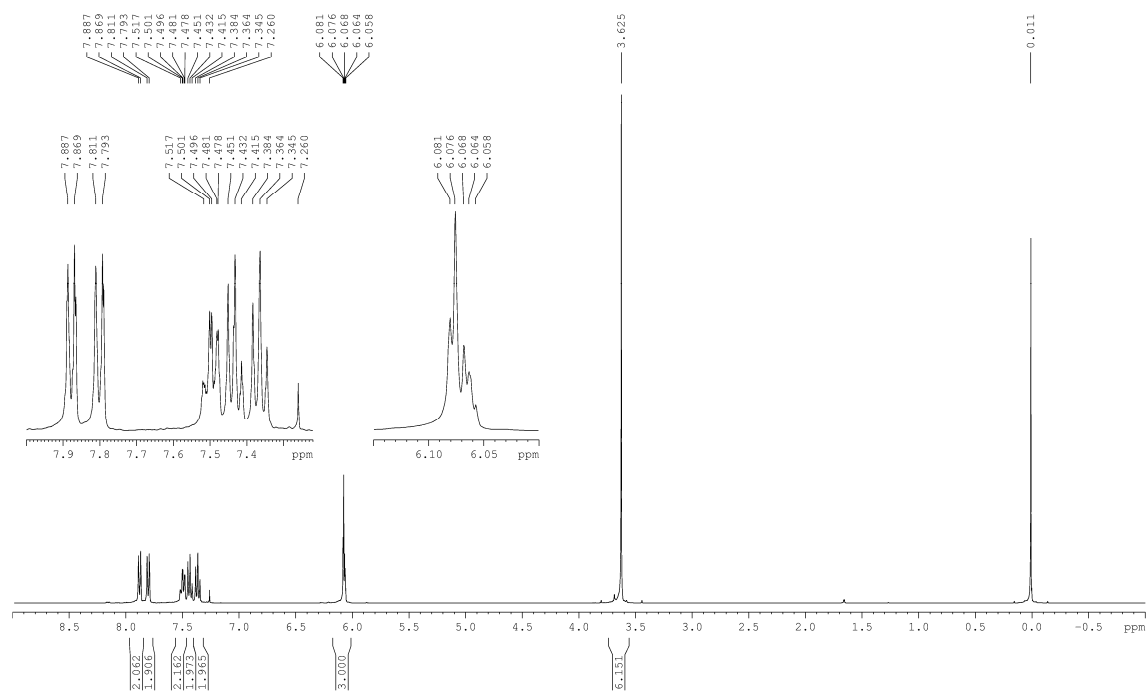

**Figure S6.**  $^1\text{H}$  NMR spectrum of **2** (400 MHz,  $\text{CDCl}_3$ , 25 °C).

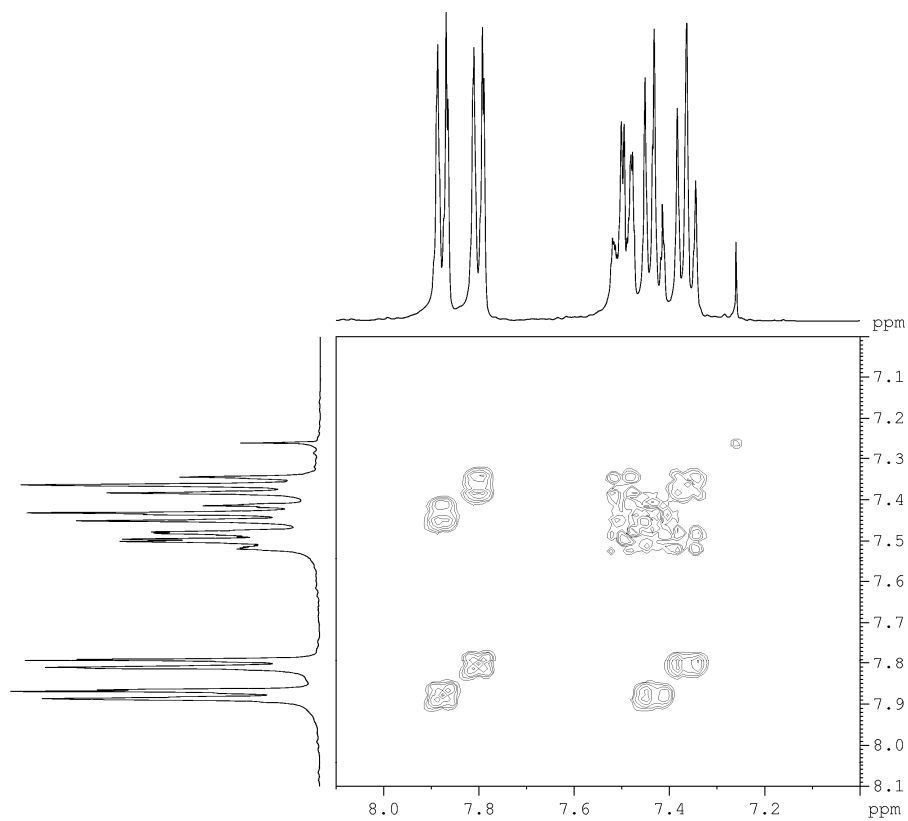

**Figure S7.**  $^1\text{H}$ - $^1\text{H}$  COSY NMR spectrum of **2** zoomed in on the aromatic region (400 MHz,  $\text{CDCl}_3$ , 25 °C).

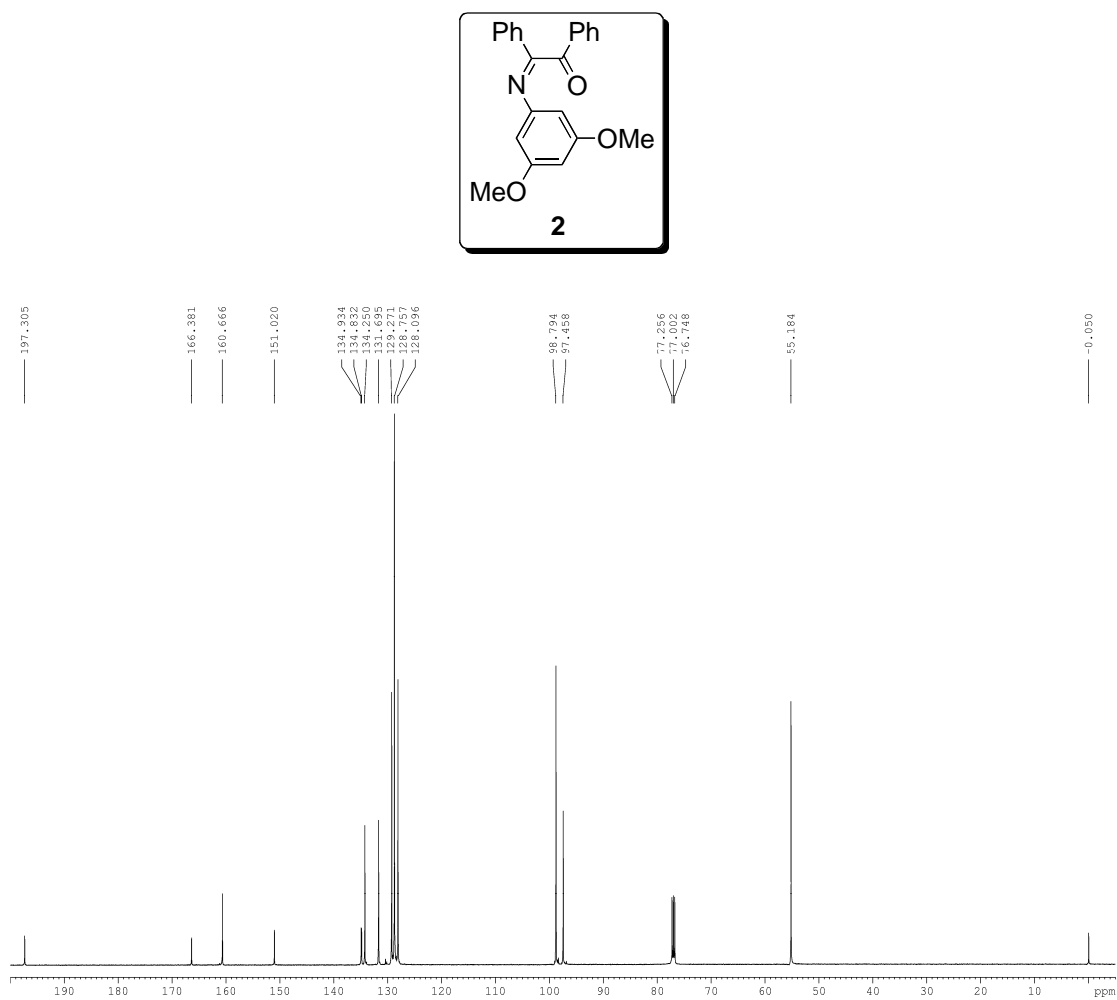

**Figure S8.**  $^{13}\text{C}\{^1\text{H}\}$  NMR spectrum of **2** (125 MHz,  $\text{CDCl}_3$ , 25 °C).

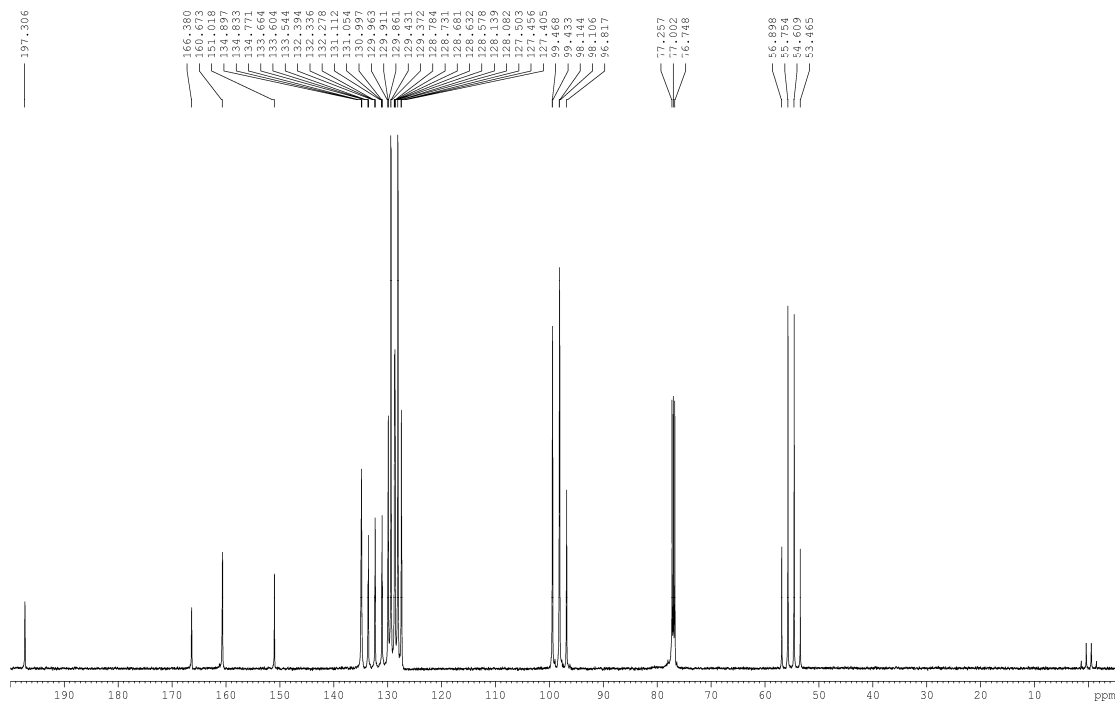

**Figure S9.** <sup>13</sup>C NMR spectrum of **2** (125 MHz, CDCl<sub>3</sub>, 25 °C).

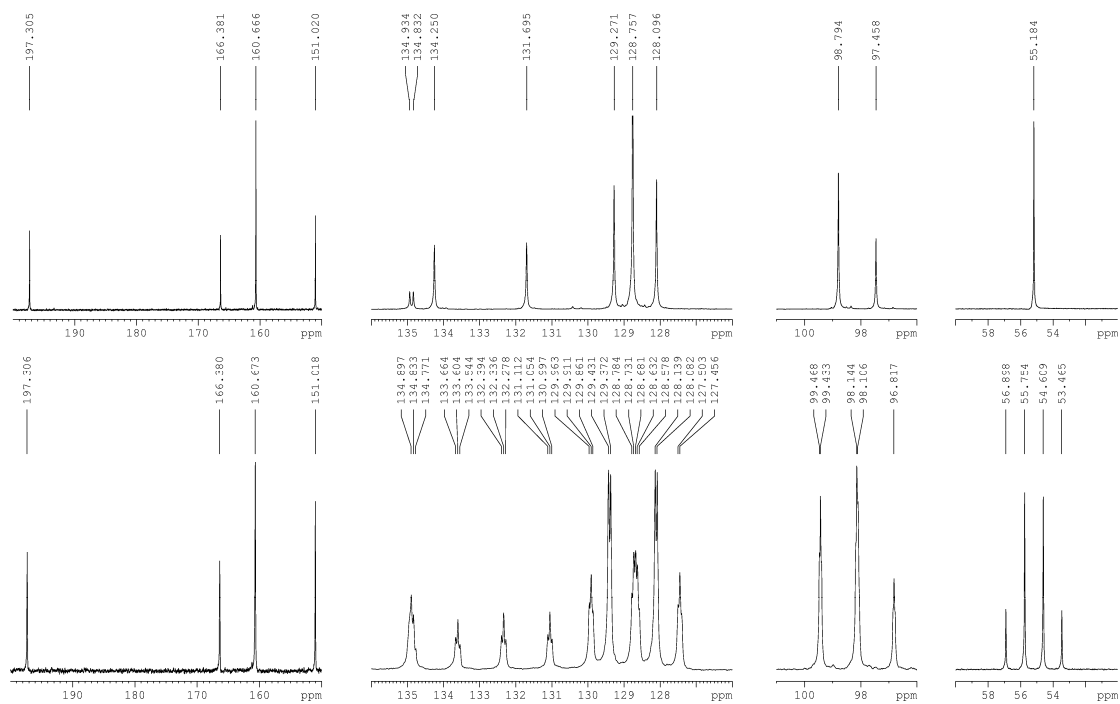

**Figure S10.**  $^{13}\text{C}\{^1\text{H}\}$  and  $^{13}\text{C}$  NMR spectra overlay of **2** (125 MHz,  $\text{CDCl}_3$ , 25 °C). Peak heights are normalized to emphasize splitting.

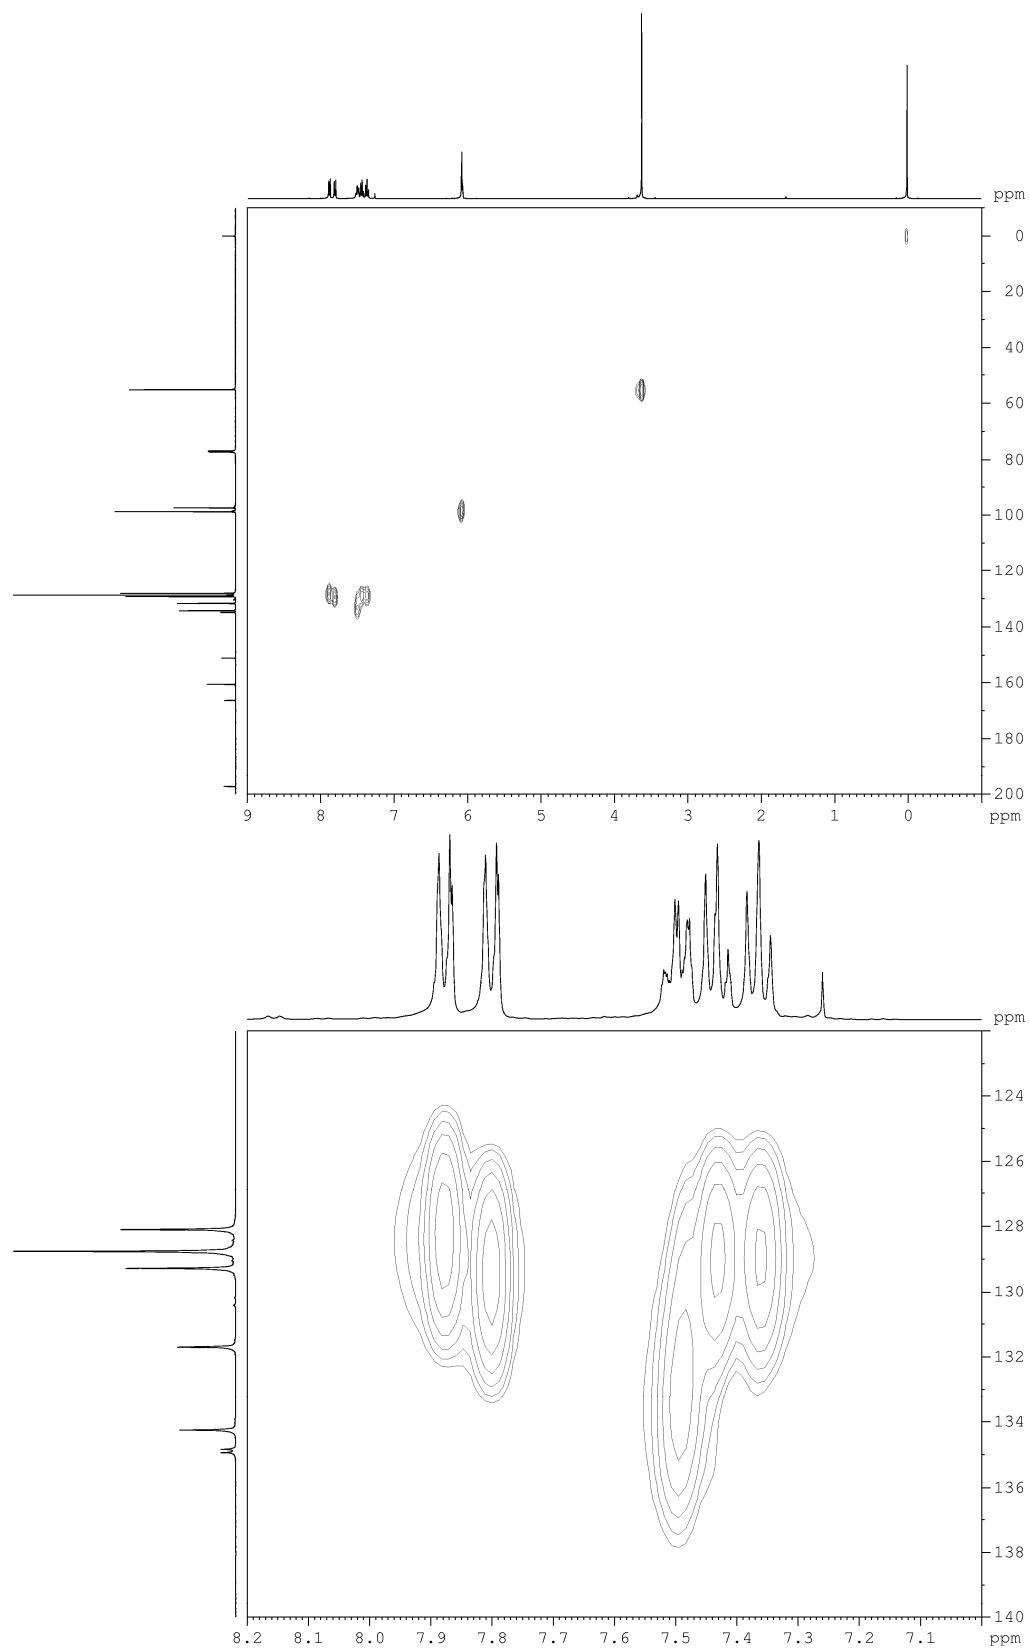

**Figure S11.**  $^1\text{H}$ - $^{13}\text{C}$  HSQC NMR spectrum of **2** (125 MHz,  $\text{CDCl}_3$ , 25 °C).

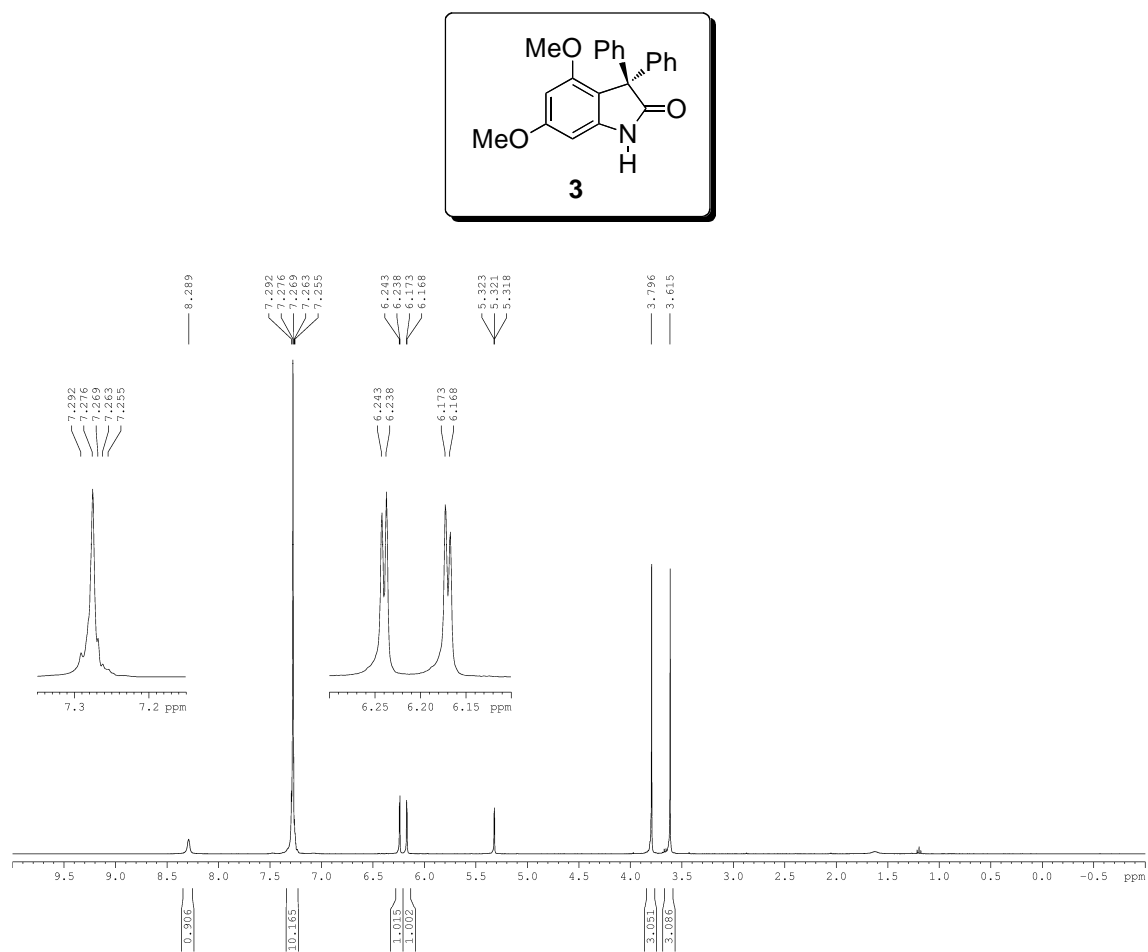

**Figure S12.** <sup>1</sup>H NMR spectrum of **3** (400 MHz, CD<sub>2</sub>Cl<sub>2</sub>, 25 °C).



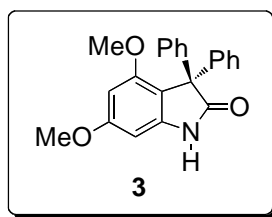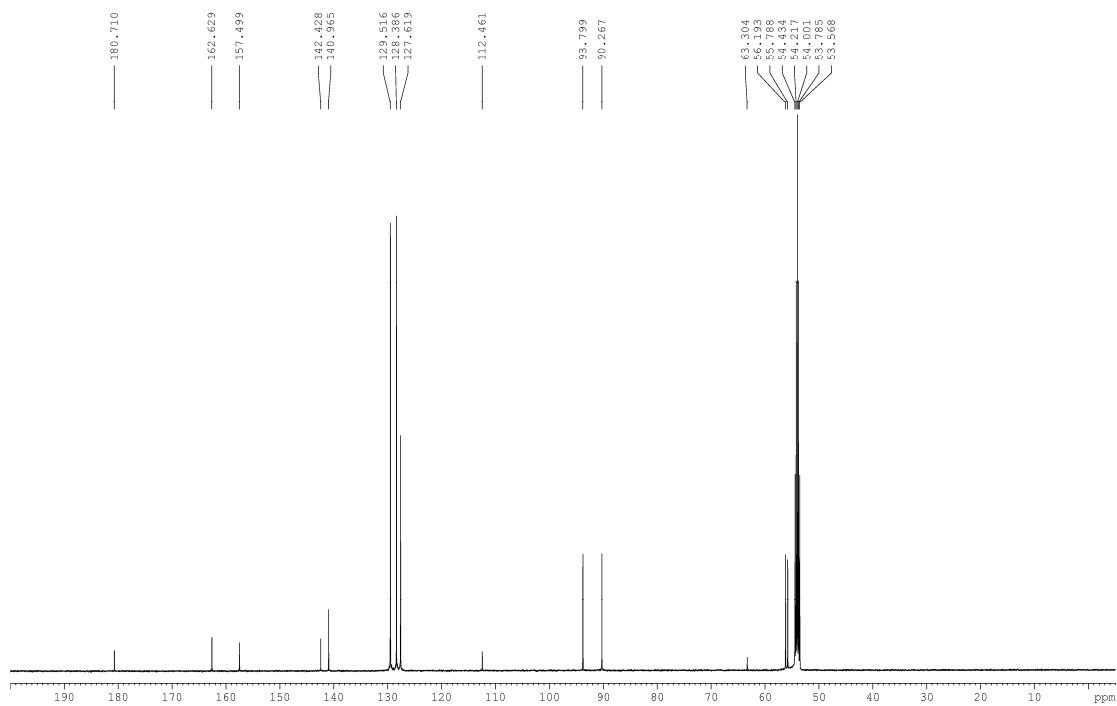

**Figure S13.**  $^{13}\text{C}\{^1\text{H}\}$  NMR spectrum of **3** (125 MHz,  $\text{CD}_2\text{Cl}_2$ , 25 °C).

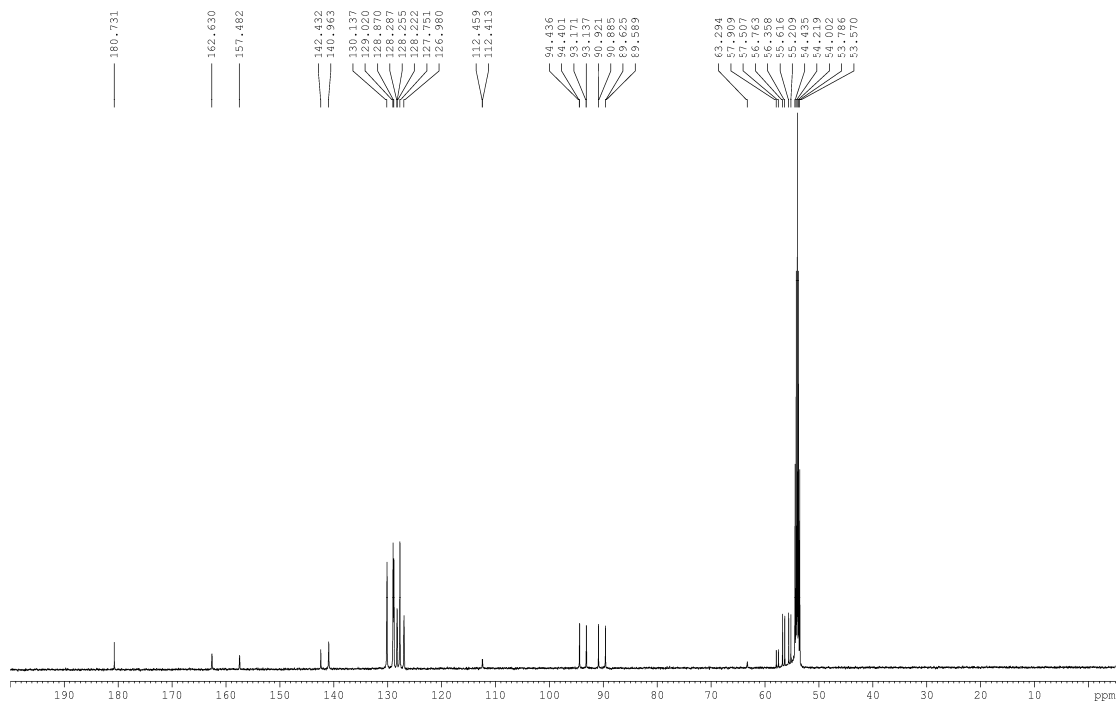

**Figure S14.**  $^{13}\text{C}$  NMR spectrum of **3** (125 MHz,  $\text{CD}_2\text{Cl}_2$ , 25 °C).

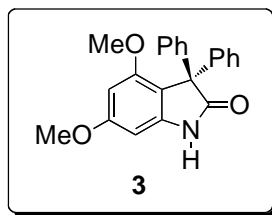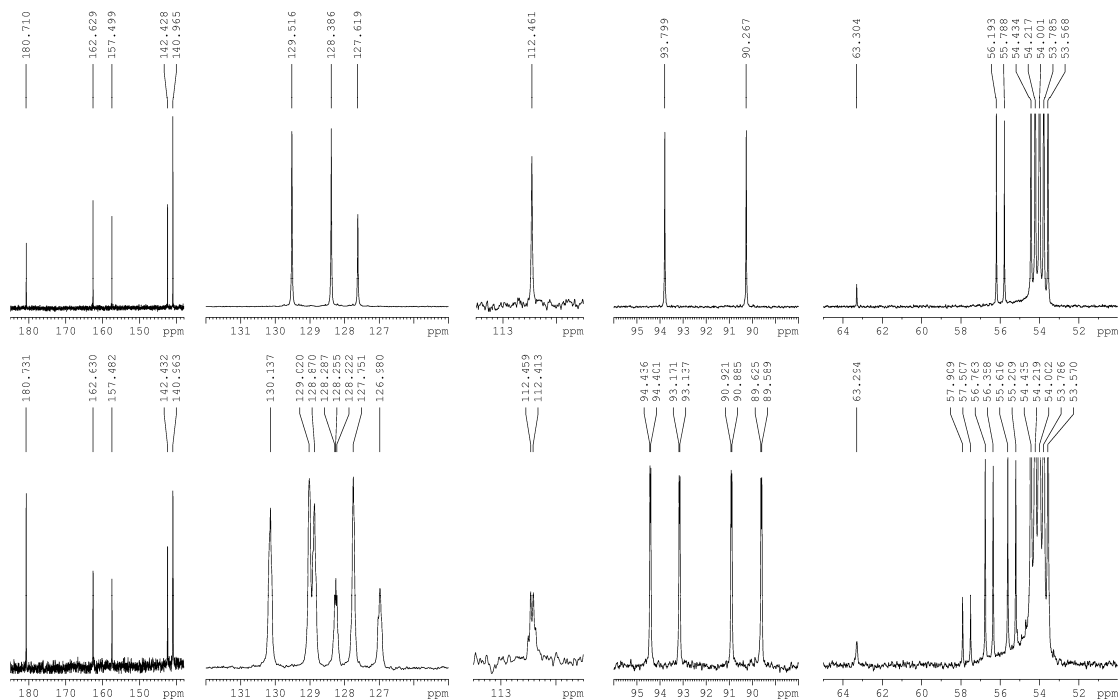

**Figure S15.**  $^{13}\text{C}\{^1\text{H}\}$  and  $^{13}\text{C}$  NMR spectra overlay of **3** (125 MHz,  $\text{CD}_2\text{Cl}_2$ , 25 °C). Peak heights are normalized to emphasize splitting.

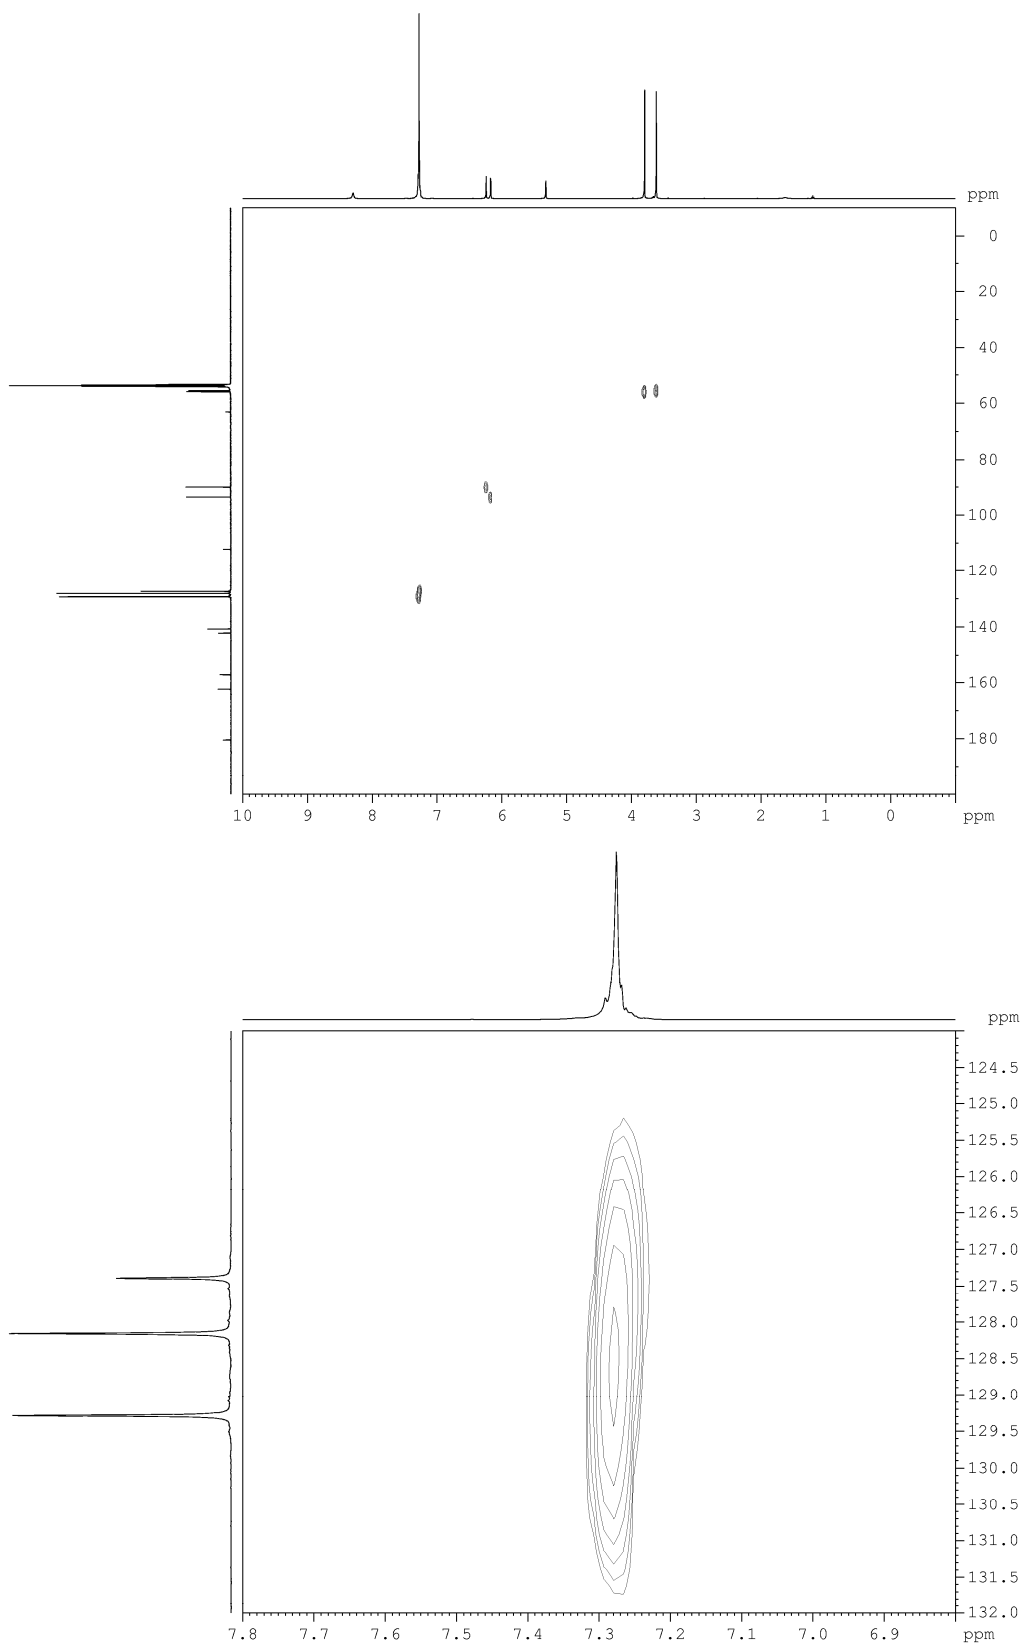

**Figure S16.**  $^1\text{H}$ - $^{13}\text{C}$  HSQC NMR spectrum of **3** (125 MHz,  $\text{CD}_2\text{Cl}_2$ , 25 °C).

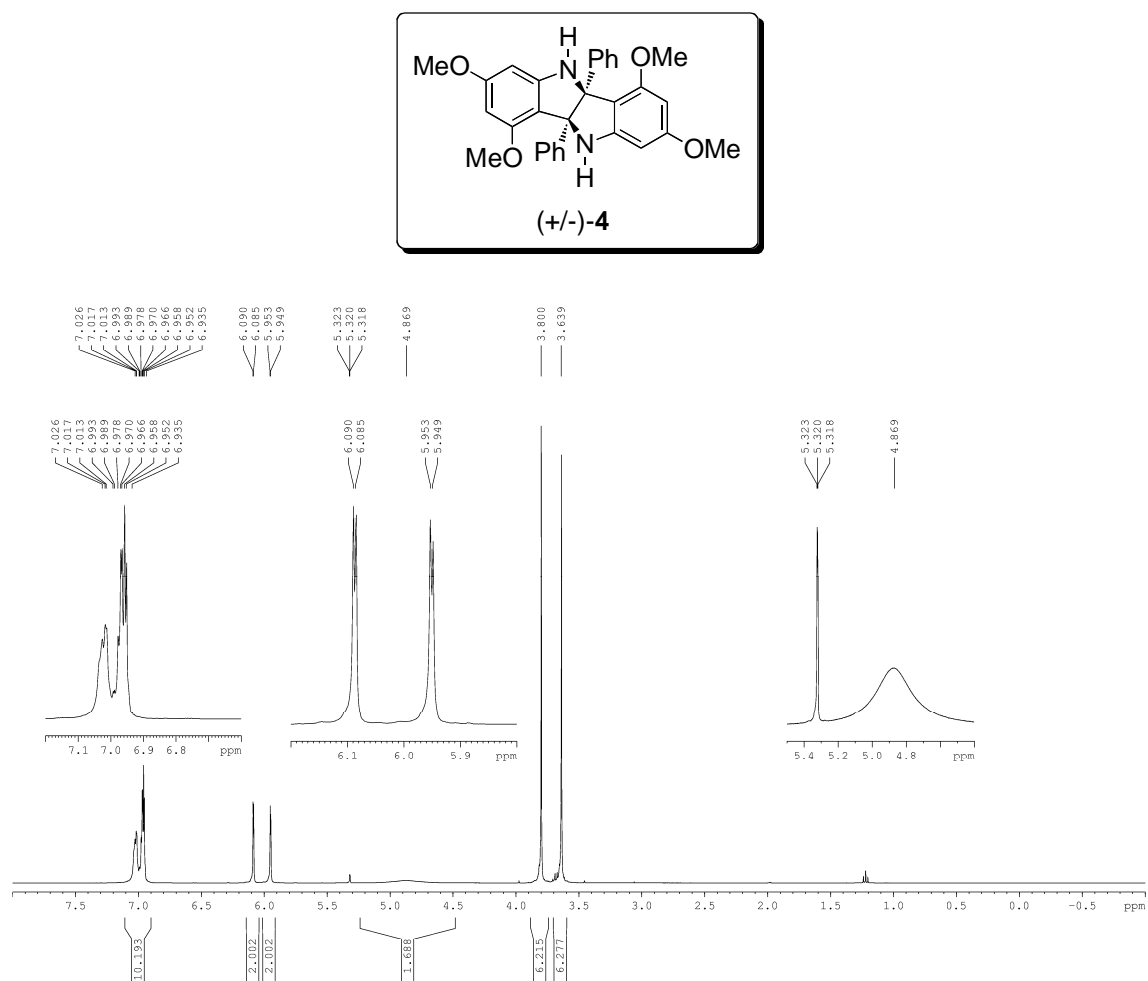

**Figure S17.**  $^1\text{H}$  NMR spectrum of (+/-)-4 (400 MHz,  $\text{CD}_2\text{Cl}_2$ , 25 °C).

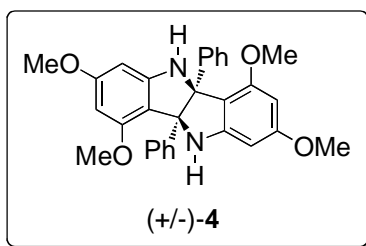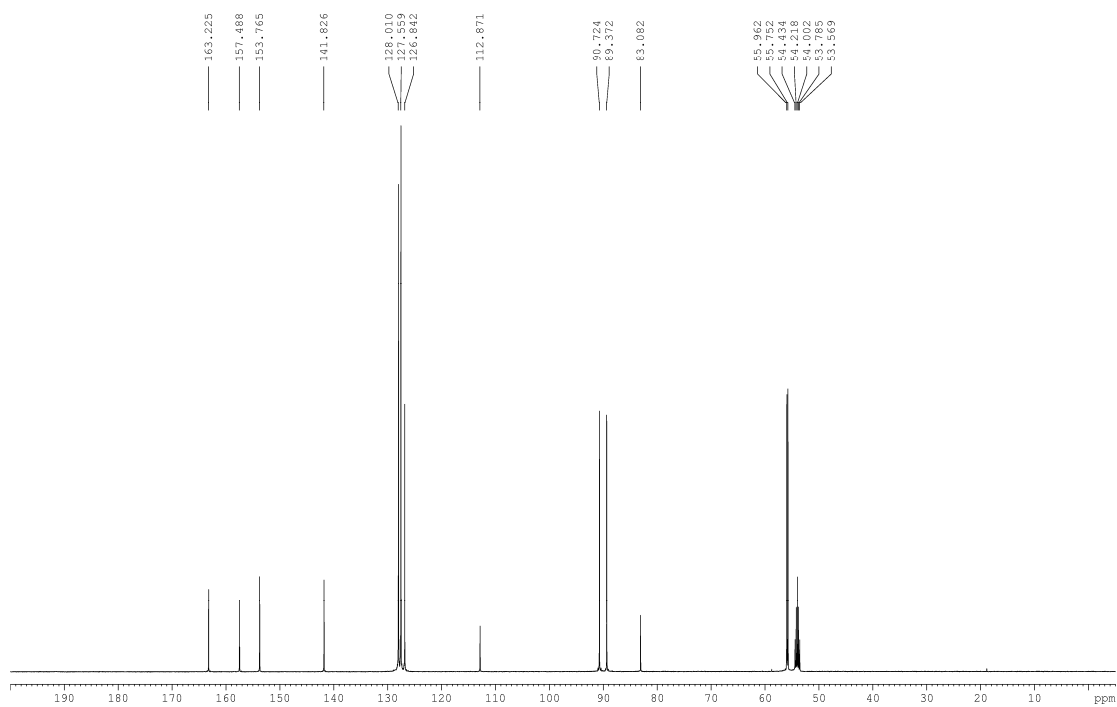

**Figure S18.**  $^{13}\text{C}\{^1\text{H}\}$  NMR spectrum of (+/-)-4 (125 MHz,  $\text{CD}_2\text{Cl}_2$ , 25 °C).

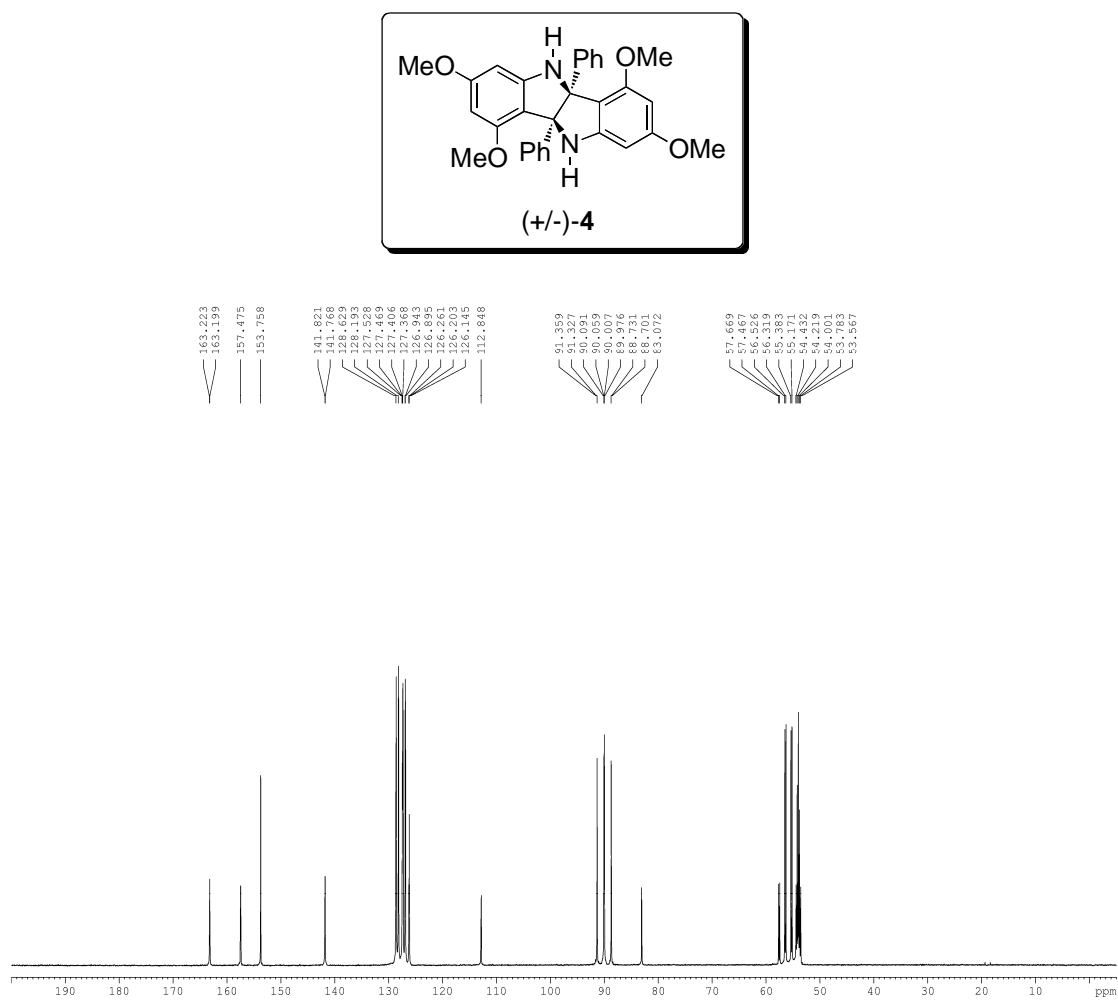

**Figure S19.**  $^{13}\text{C}$  NMR spectrum of (+/-)-4 (125 MHz,  $\text{CD}_2\text{Cl}_2$ , 25 °C).

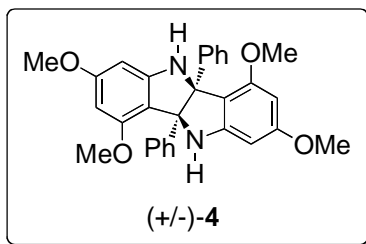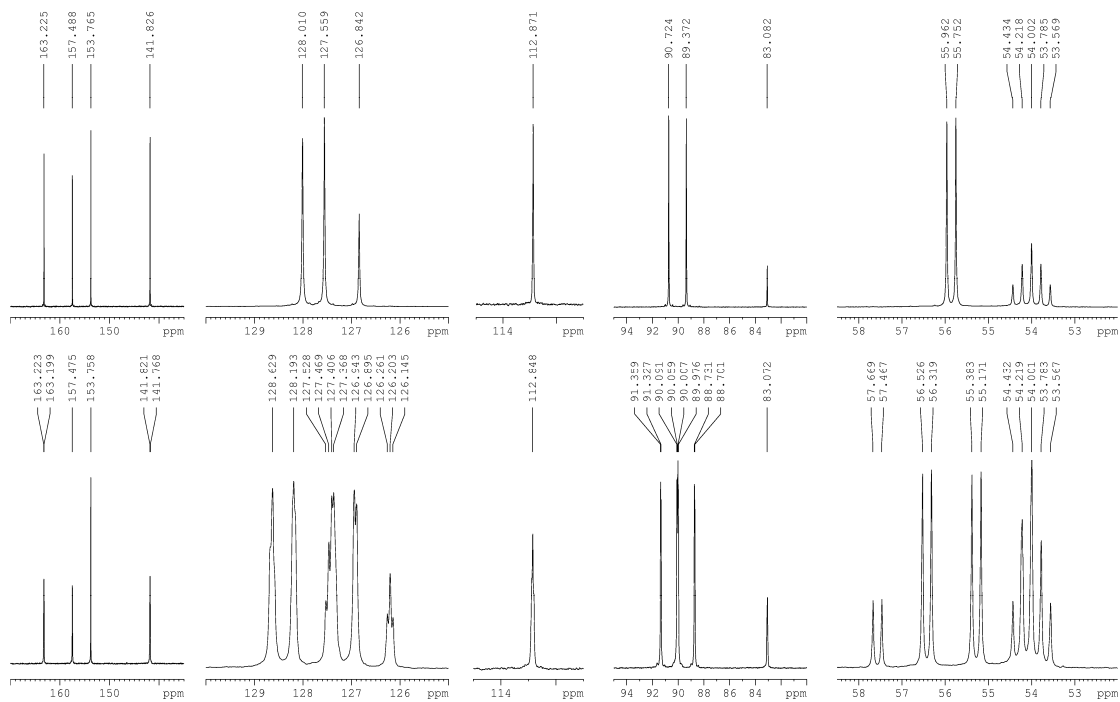

**Figure S20.**  $^{13}\text{C}\{^1\text{H}\}$  and  $^{13}\text{C}$  NMR spectra overlay of (+/-)-4 (125 MHz,  $\text{CD}_2\text{Cl}_2$ , 25 °C). Peak heights are normalized to emphasize splitting.



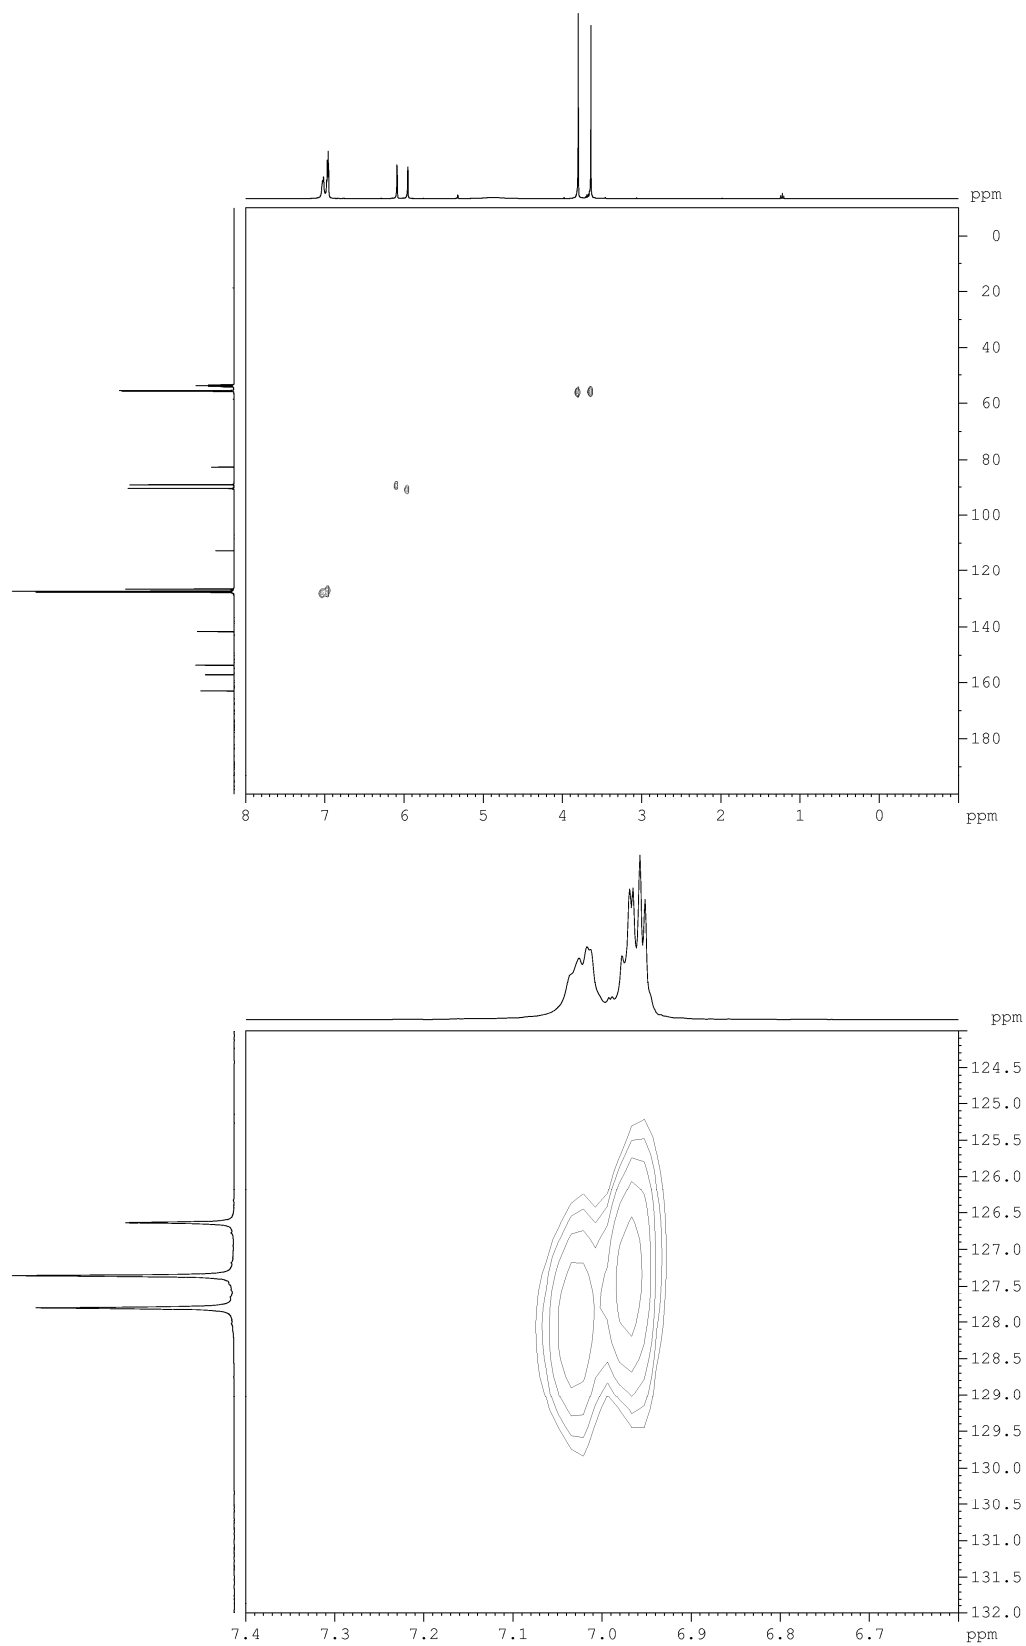

**Figure S21.**  $^1\text{H}$ - $^{13}\text{C}$  HSQC NMR spectrum of (+/-)-4 (125 MHz,  $\text{CD}_2\text{Cl}_2$ , 25 °C).

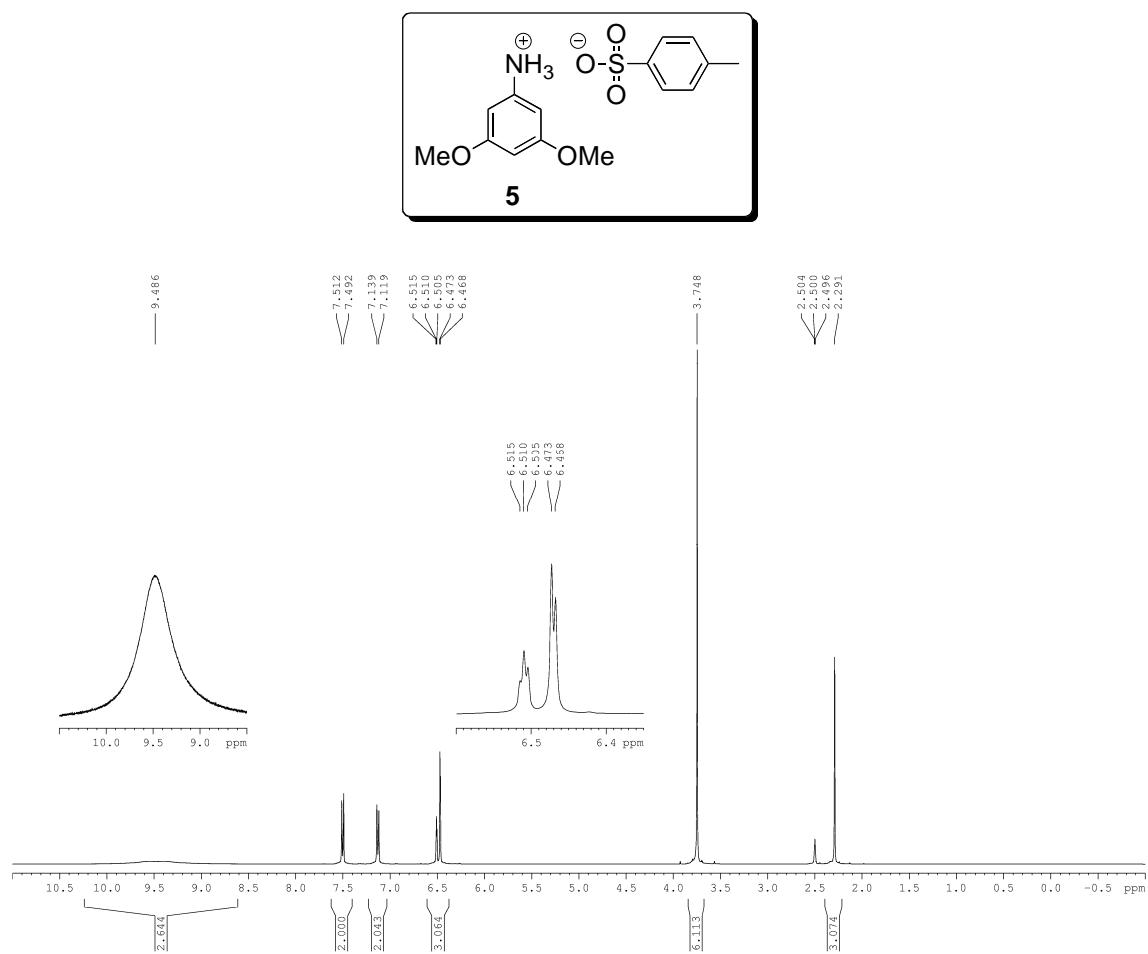

**Figure S22.**  $^1\text{H}$  NMR spectrum of **5** (400 MHz,  $\text{DMSO-}d_6$ , 25 °C).

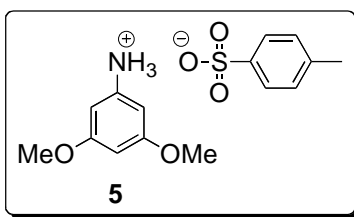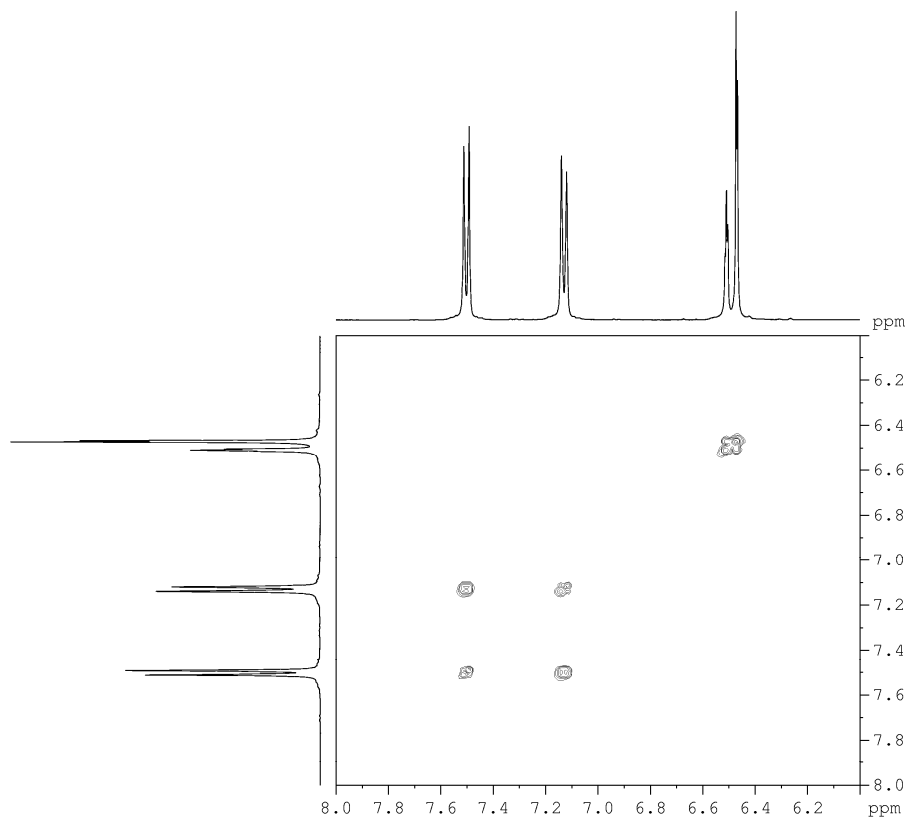

**Figure S23.** <sup>1</sup>H-<sup>1</sup>H COSY NMR spectrum of **5** zoomed in on the aromatic region (400 MHz, DMSO-*d*<sub>6</sub>, 25 °C).

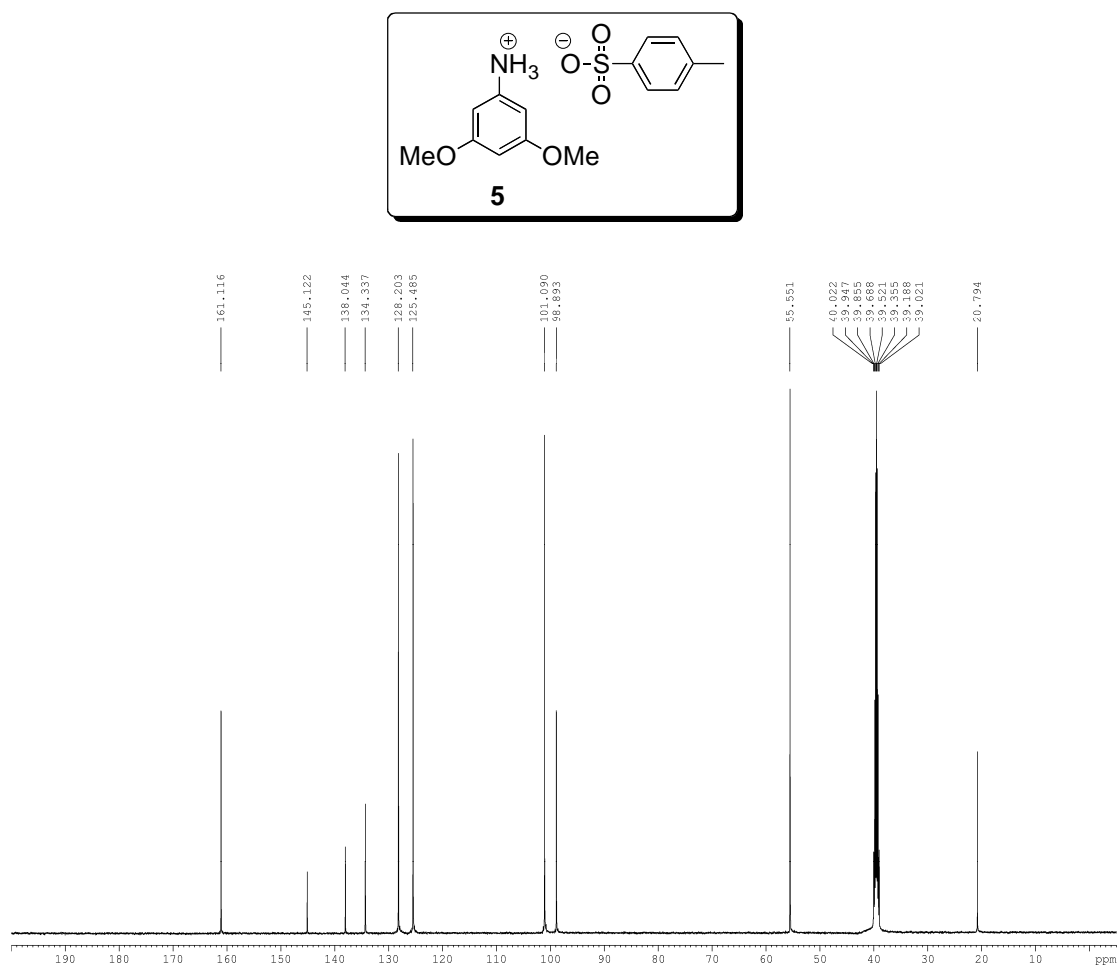

**Figure S24.**  $^{13}\text{C}\{^1\text{H}\}$  NMR spectrum of **5** (125 MHz, DMSO- $d_6$ , 25 °C).

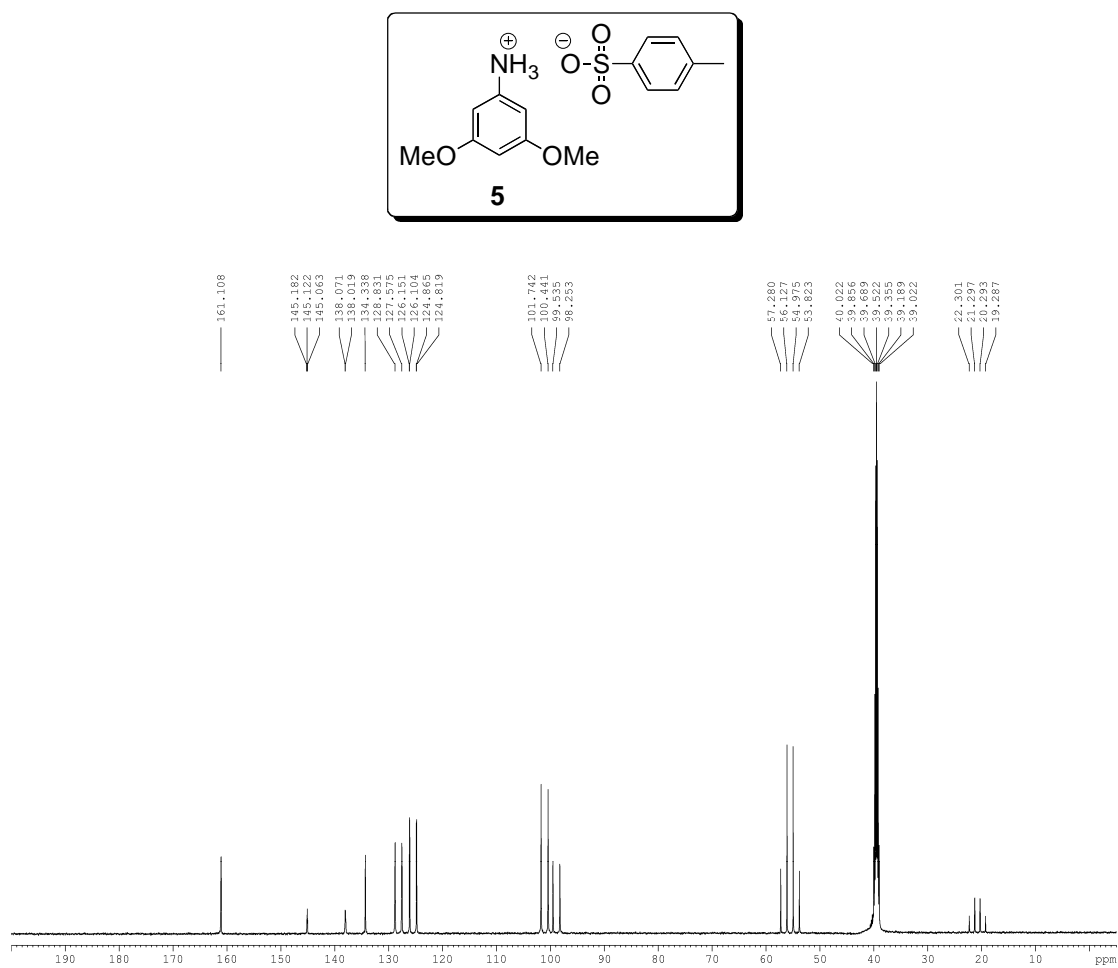

**Figure S25.**  $^{13}\text{C}$  NMR spectrum of **5** (125 MHz,  $\text{DMSO-}d_6$ , 25 °C).

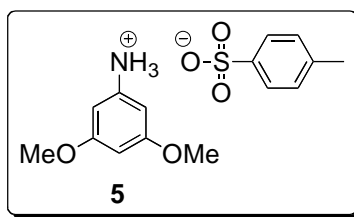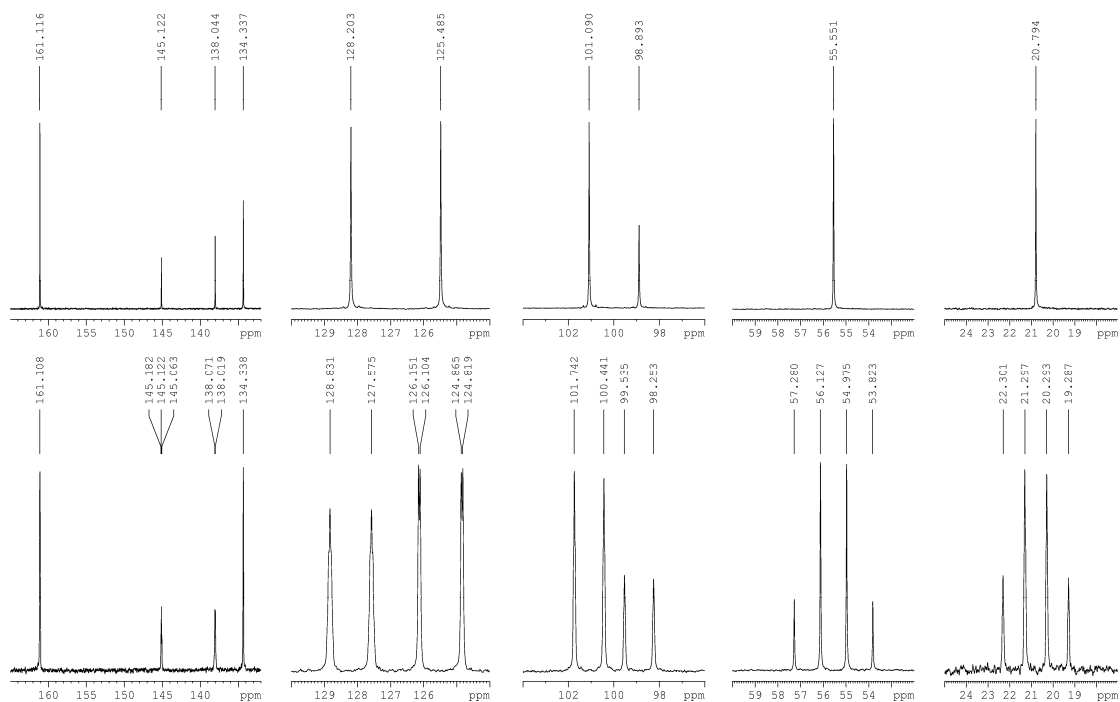

**Figure S26.**  $^{13}\text{C}\{^1\text{H}\}$  and  $^{13}\text{C}$  NMR spectra overlay of **5** (125 MHz,  $\text{DMSO-}d_6$ , 25 °C). Peak heights are normalized to emphasize splitting.

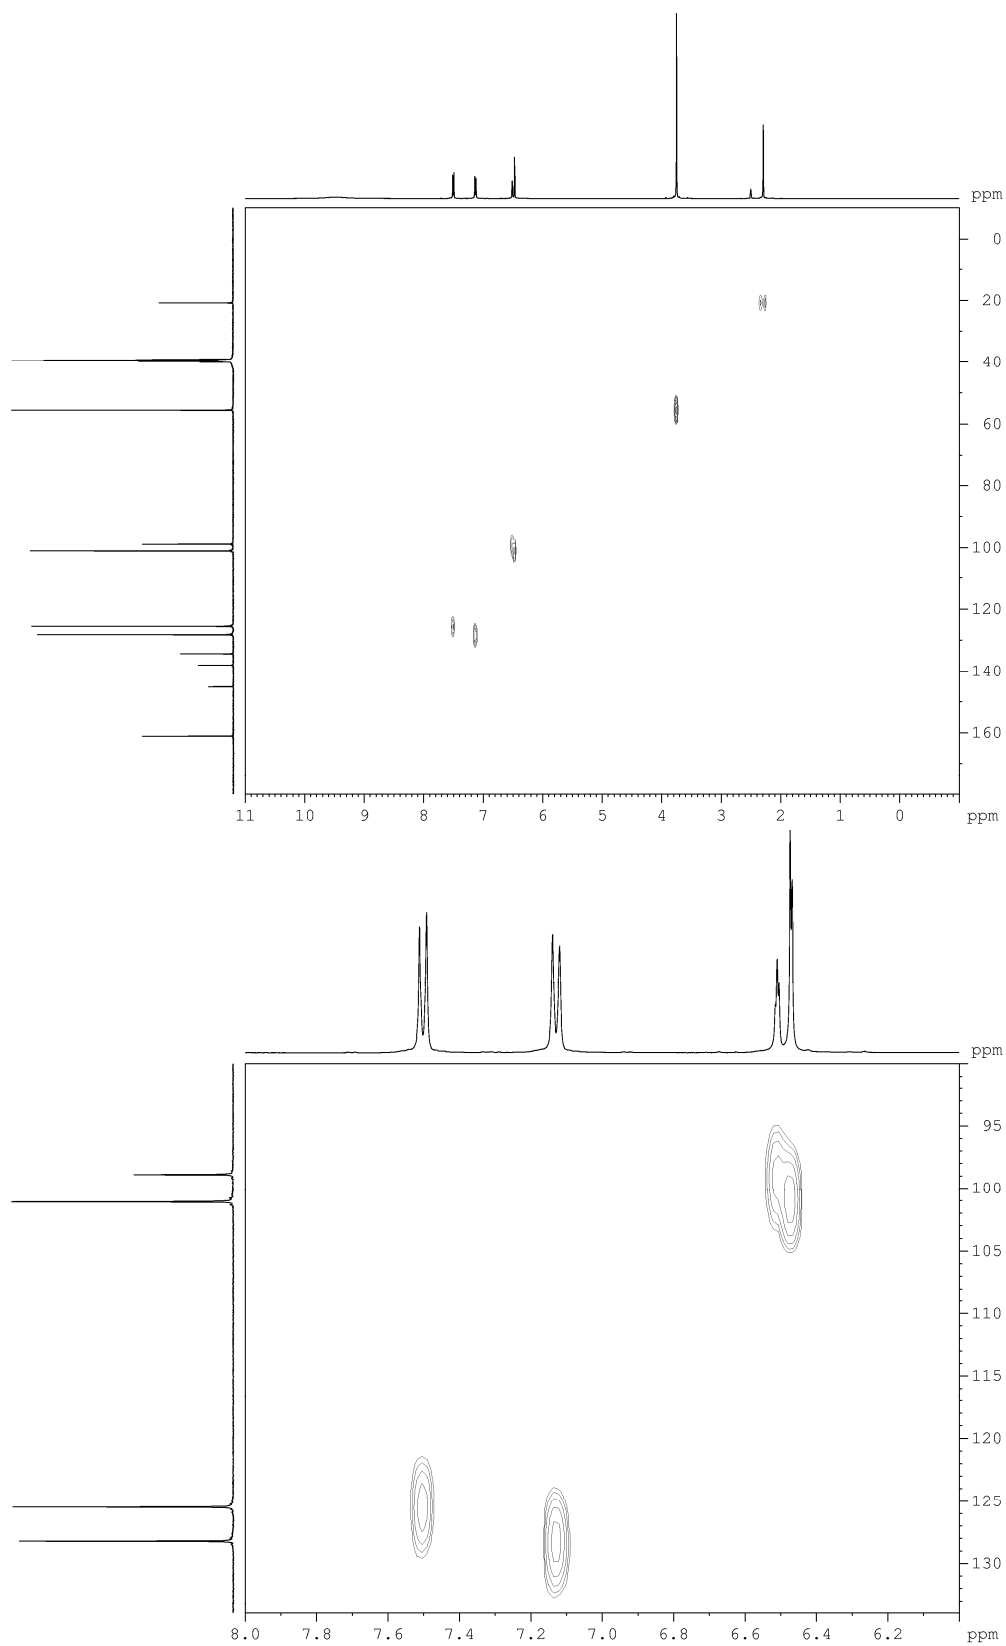

**Figure S27.**  $^1\text{H}$ - $^{13}\text{C}$  HSQC NMR spectrum of **5** (125 MHz,  $\text{DMSO-}d_6$ , 25 °C).

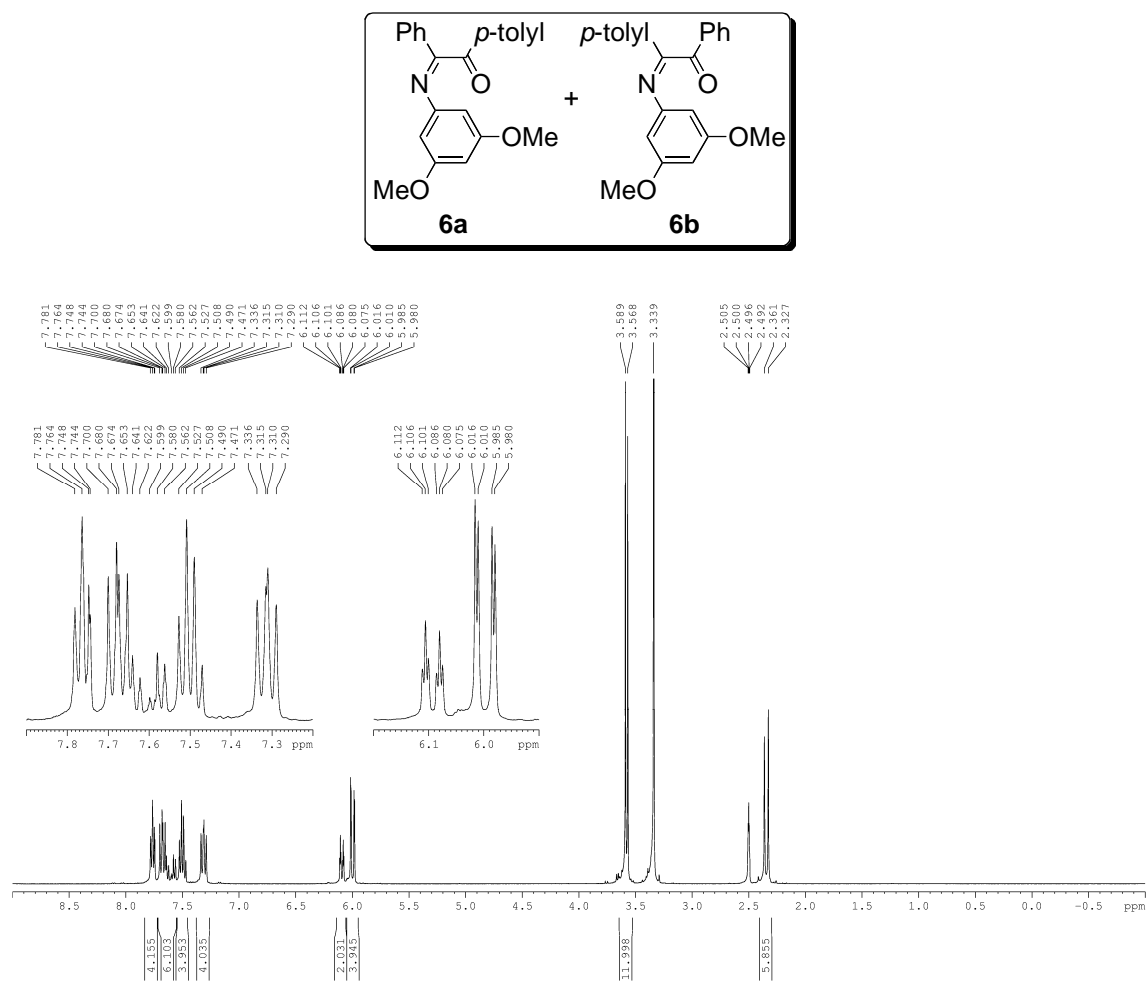

**Figure S28.**  $^1\text{H}$  NMR spectrum of **6a** and **6b** (400 MHz,  $\text{DMSO}-d_6$ , 25 °C).



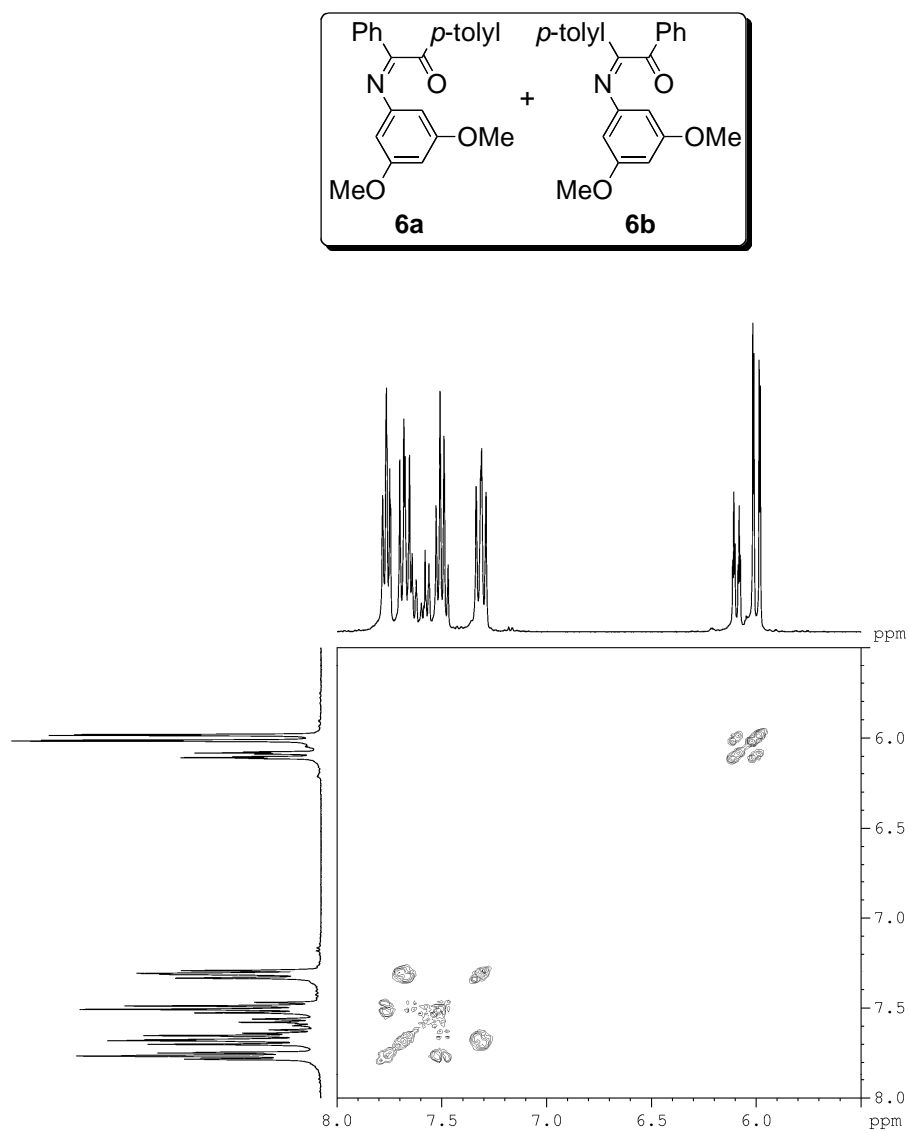

**Figure S29.** <sup>1</sup>H-<sup>1</sup>H COSY NMR spectrum of **6a** and **6b** zoomed in on the aromatic region (400 MHz, DMSO-*d*<sub>6</sub>, 25 °C).

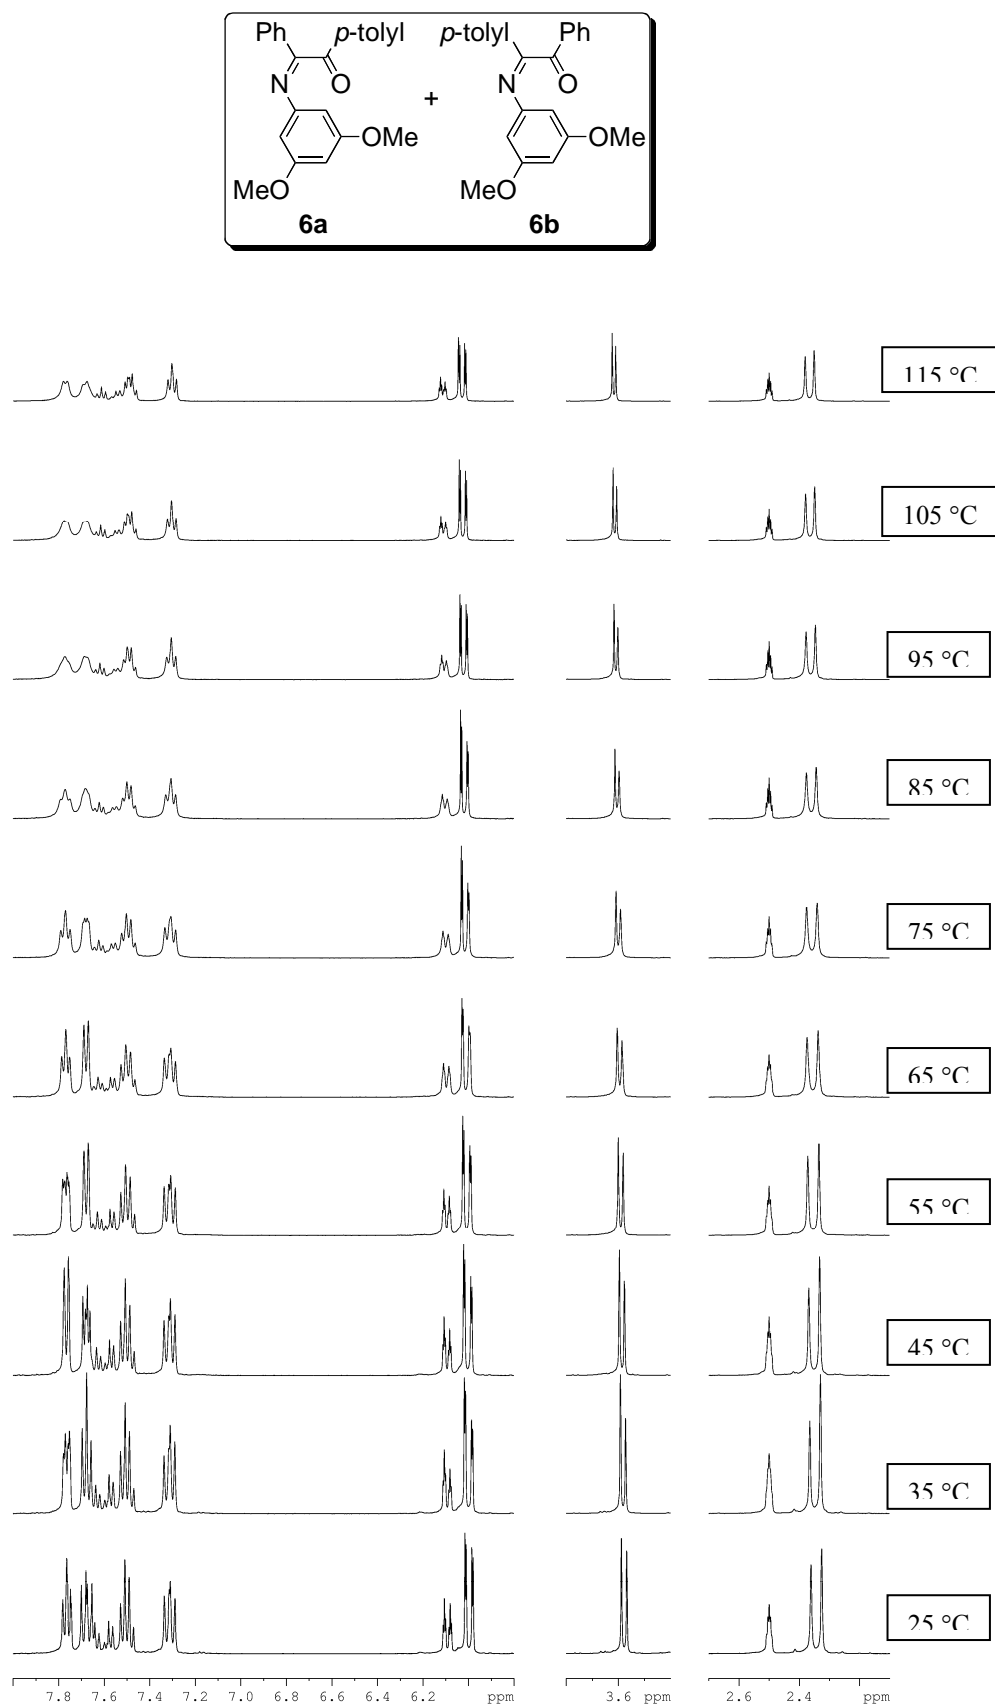

**Figure S30.**  $^1\text{H}$  VT NMR spectra of **6a** and **6b** (400 MHz,  $\text{DMSO}-d_6$ ). Peak heights are normalized.

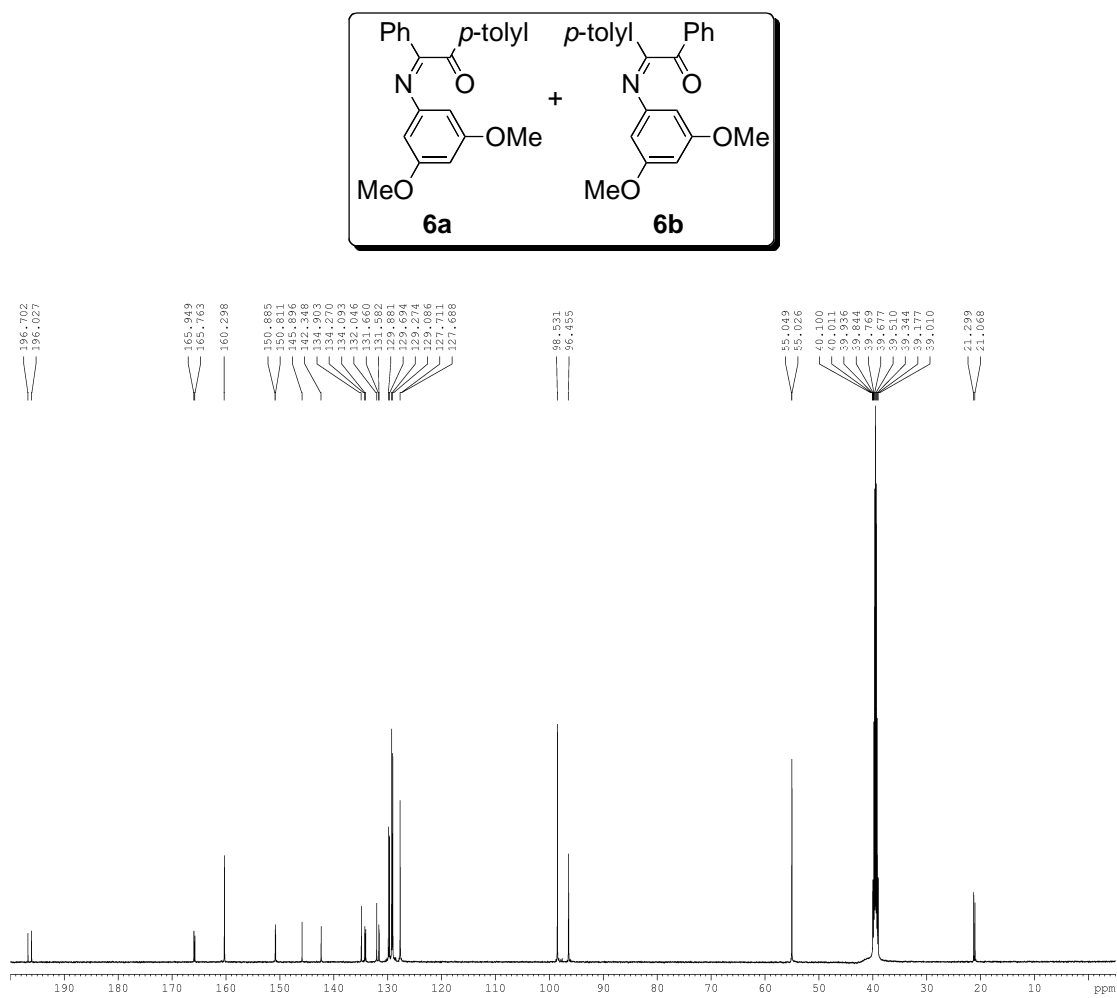

**Figure S31.**  $^{13}\text{C}\{^1\text{H}\}$  NMR spectrum of **6a** and **6b** (125 MHz, DMSO- $d_6$ , 25 °C).

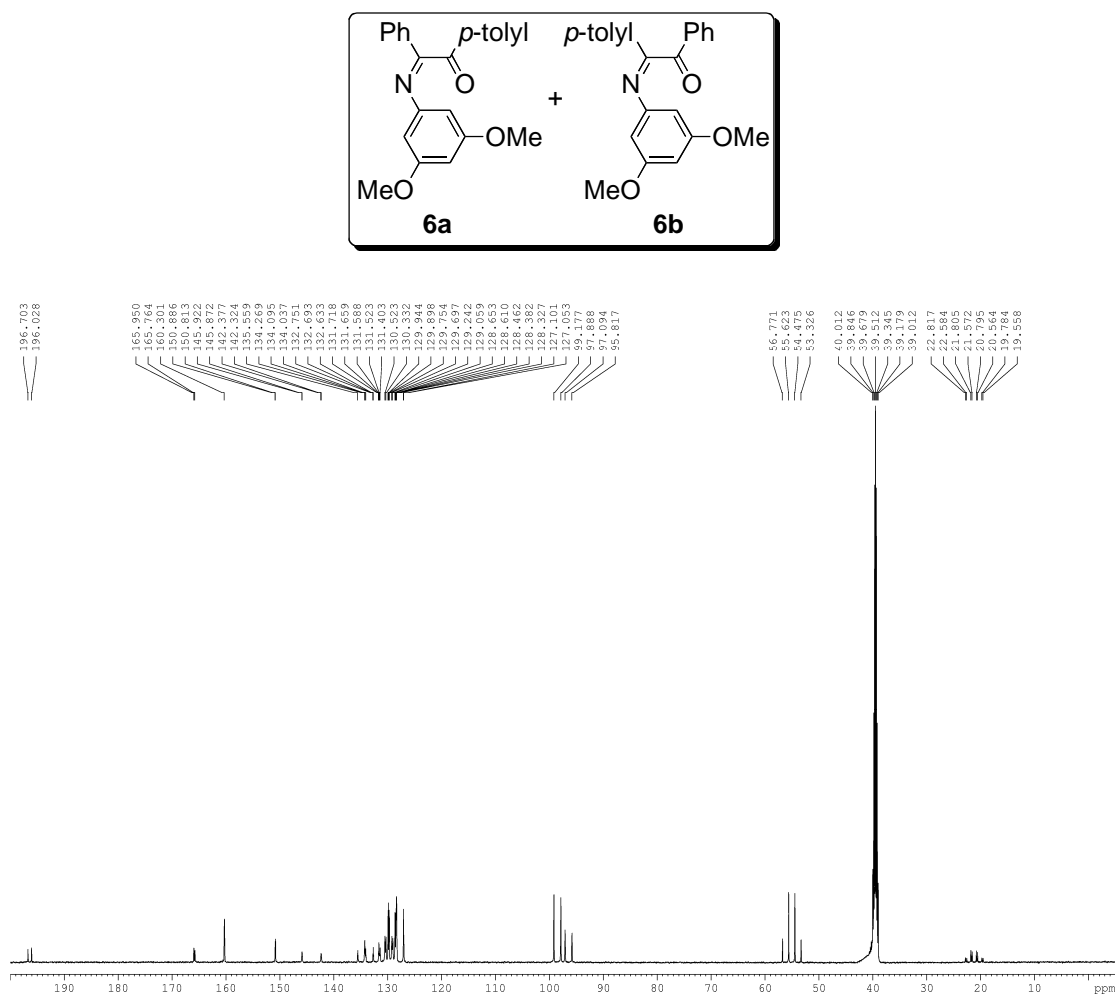

**Figure S32.**  $^{13}\text{C}$  NMR spectrum of **6a** and **6b** (125 MHz, DMSO- $d_6$ , 25 °C).

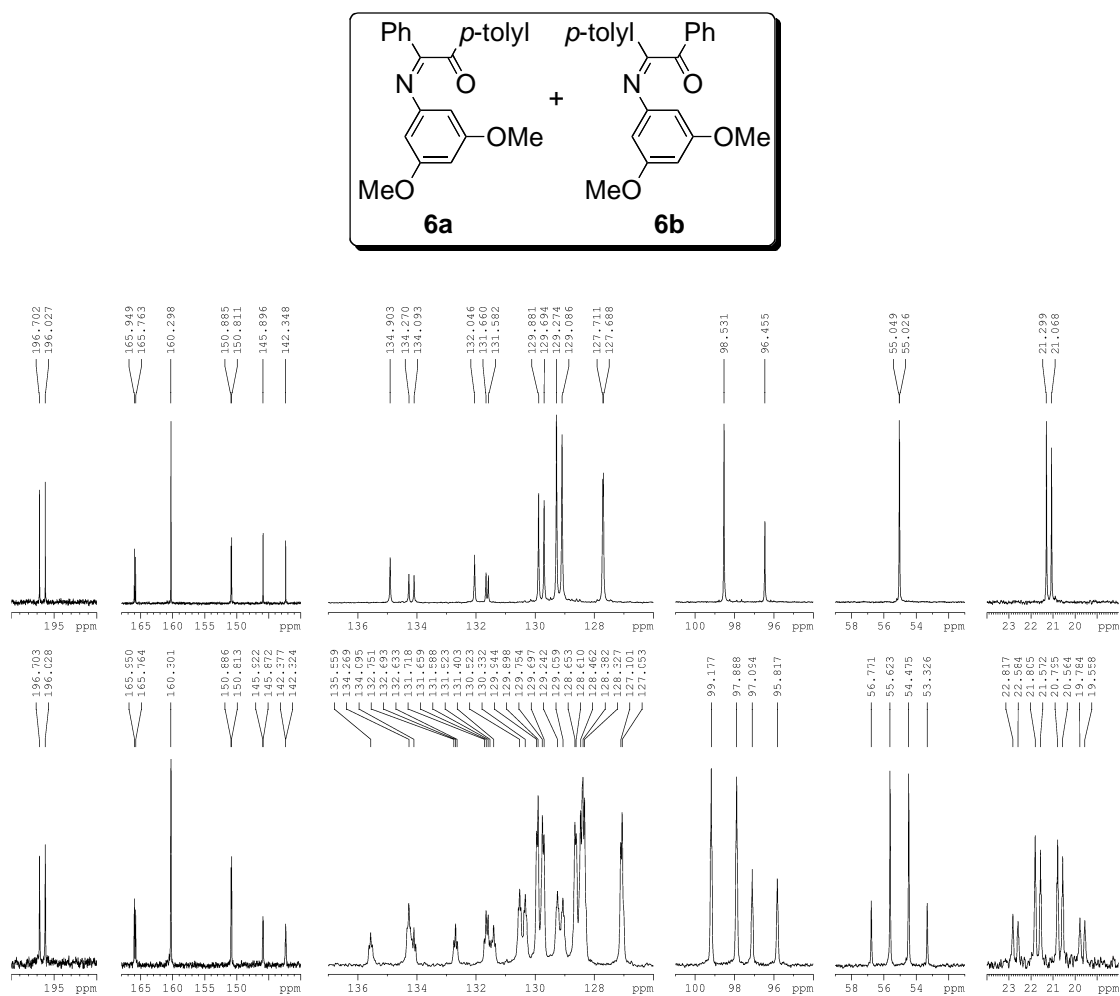

**Figure S33.**  $^{13}\text{C}\{^1\text{H}\}$  and  $^{13}\text{C}$  NMR spectra overlay of **6a** and **6b** (125 MHz,  $\text{DMSO}-d_6$ , 25 °C). Peak heights are normalized to emphasize splitting.

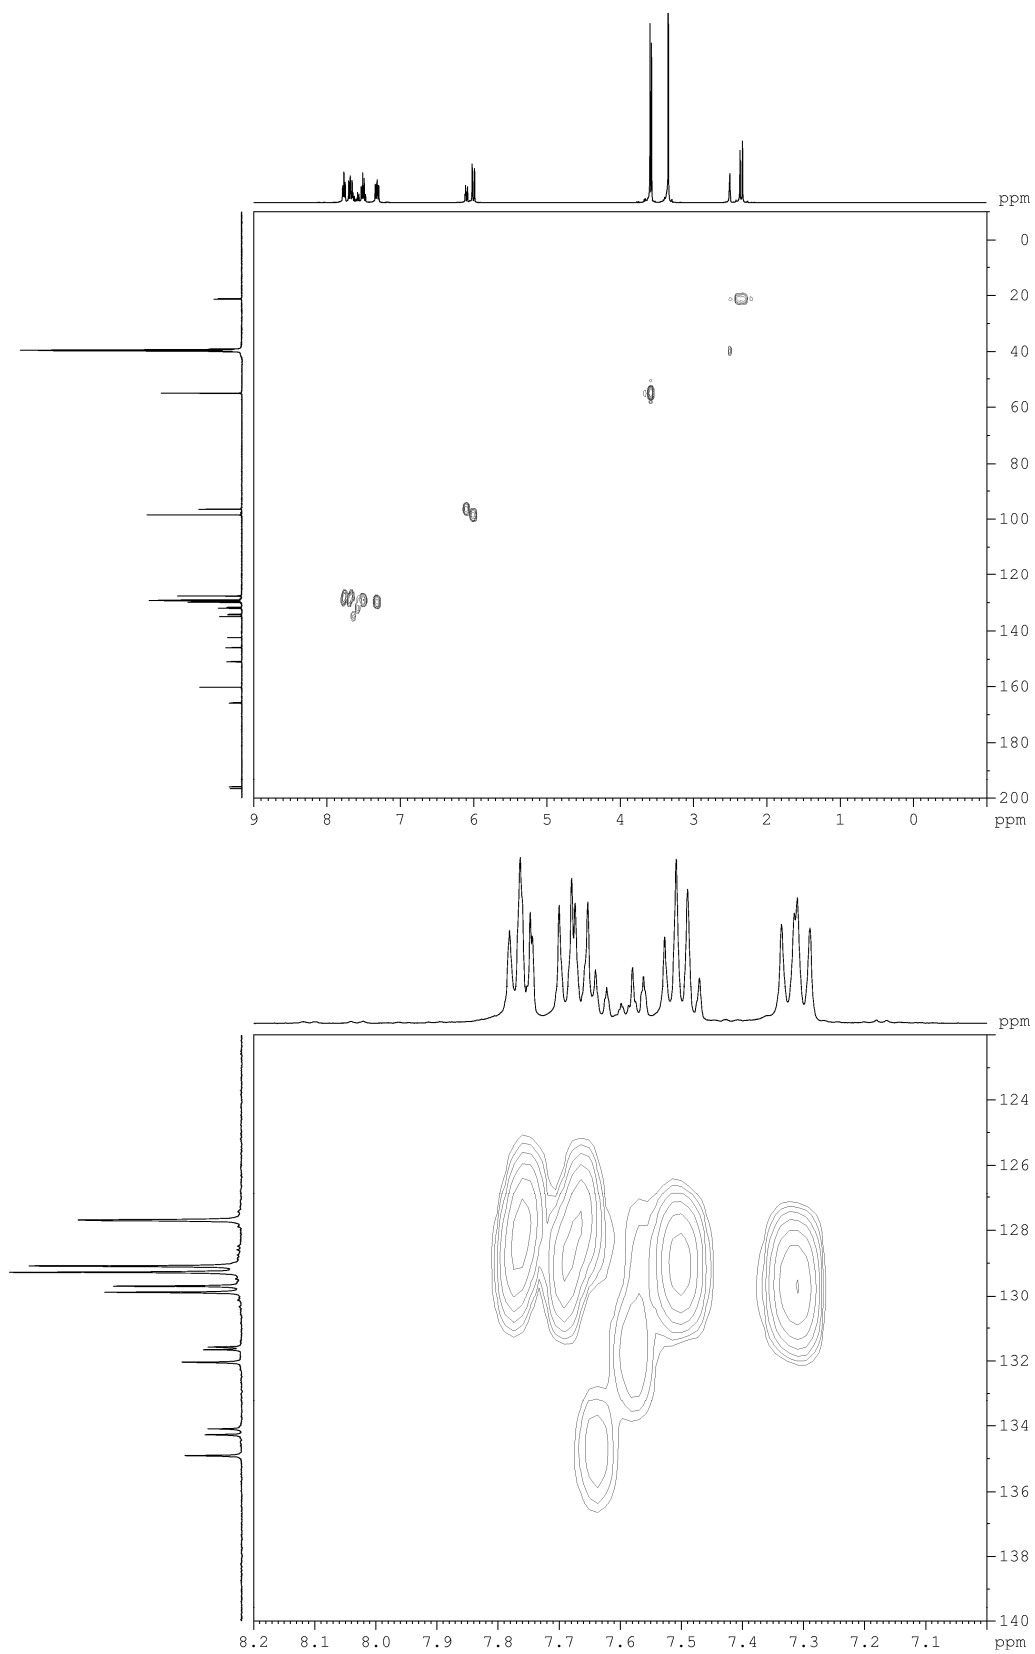

**Figure S34.**  $^1\text{H}$ - $^{13}\text{C}$  HSQC NMR spectrum of **6a** and **6b** (125 MHz,  $\text{DMSO-}d_6$ , 25 °C).

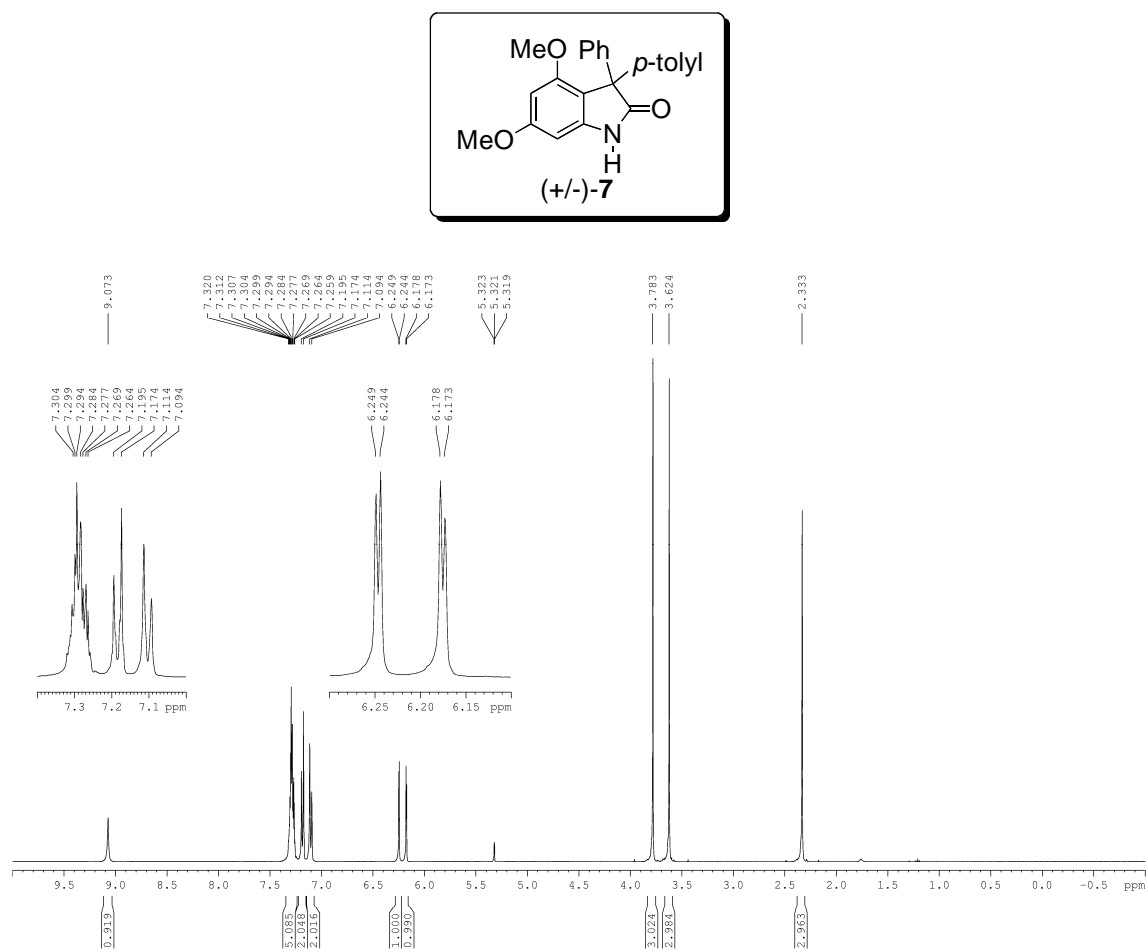

**Figure S35.**  $^1\text{H}$  NMR spectrum of (+/-)-7 (400 MHz,  $\text{CD}_2\text{Cl}_2$ , 25 °C).

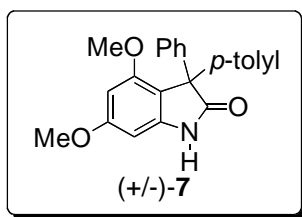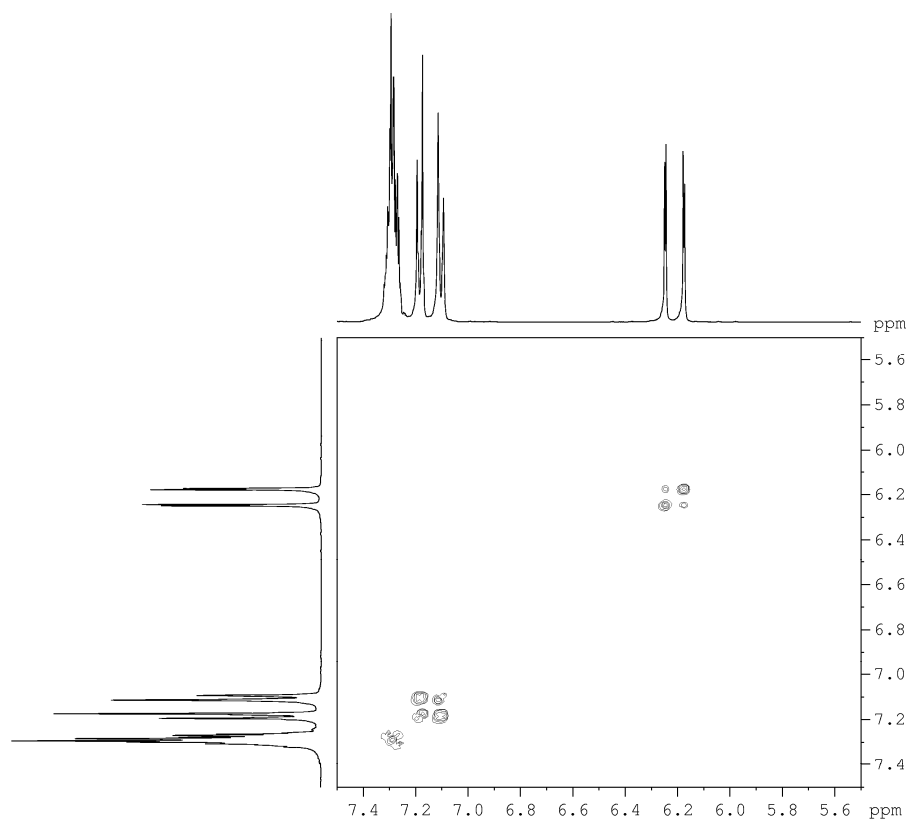

**Figure S36.**  $^1\text{H}$ - $^1\text{H}$  COSY NMR spectrum of (+/-)-7 zoomed in on the aromatic region (400 MHz,  $\text{CD}_2\text{Cl}_2$ , 25  $^\circ\text{C}$ ).



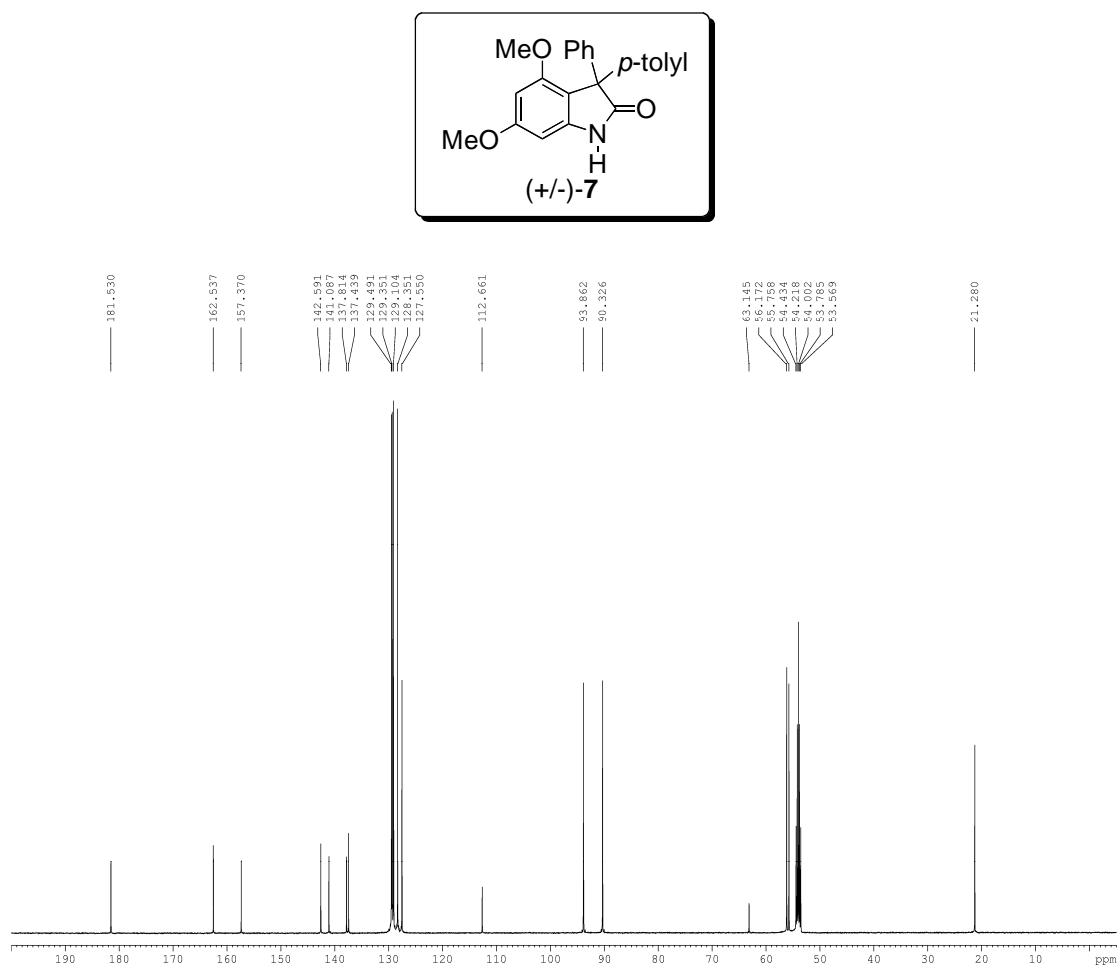

**Figure S37.** <sup>13</sup>C{<sup>1</sup>H} NMR spectrum of (+/-)-7 (125 MHz, CD<sub>2</sub>Cl<sub>2</sub>, 25 °C).

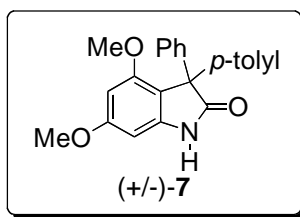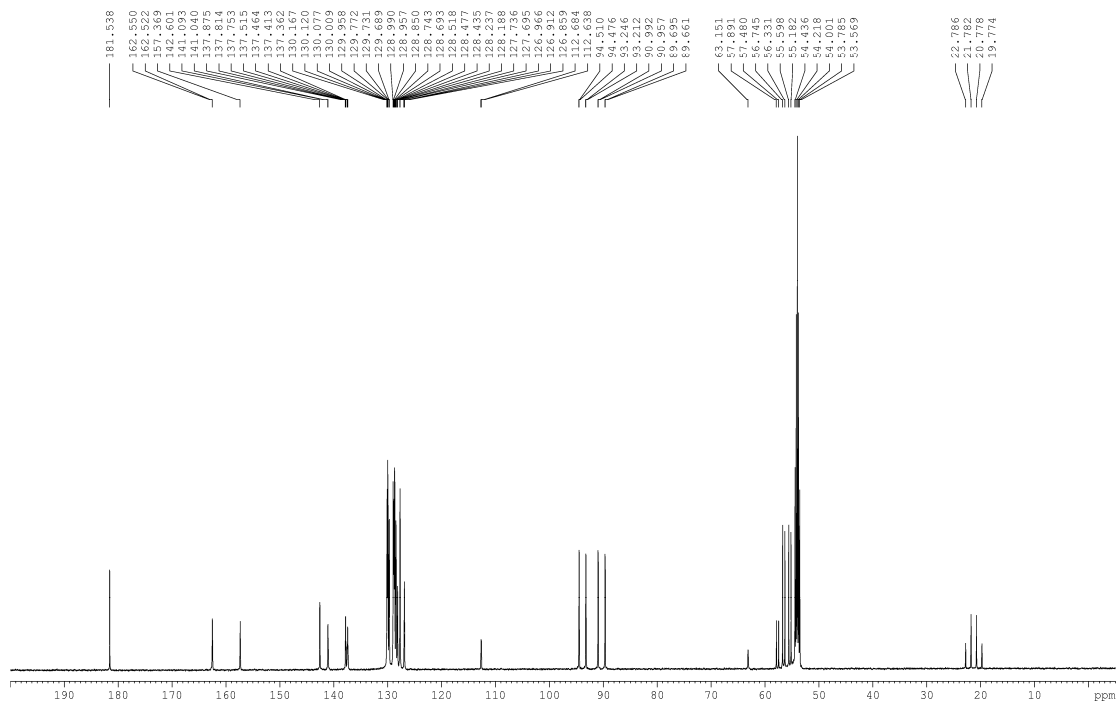

**Figure S38.** <sup>13</sup>C NMR spectrum of (+/-)-7 (125 MHz, CD<sub>2</sub>Cl<sub>2</sub>, 25 °C).

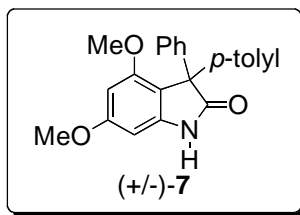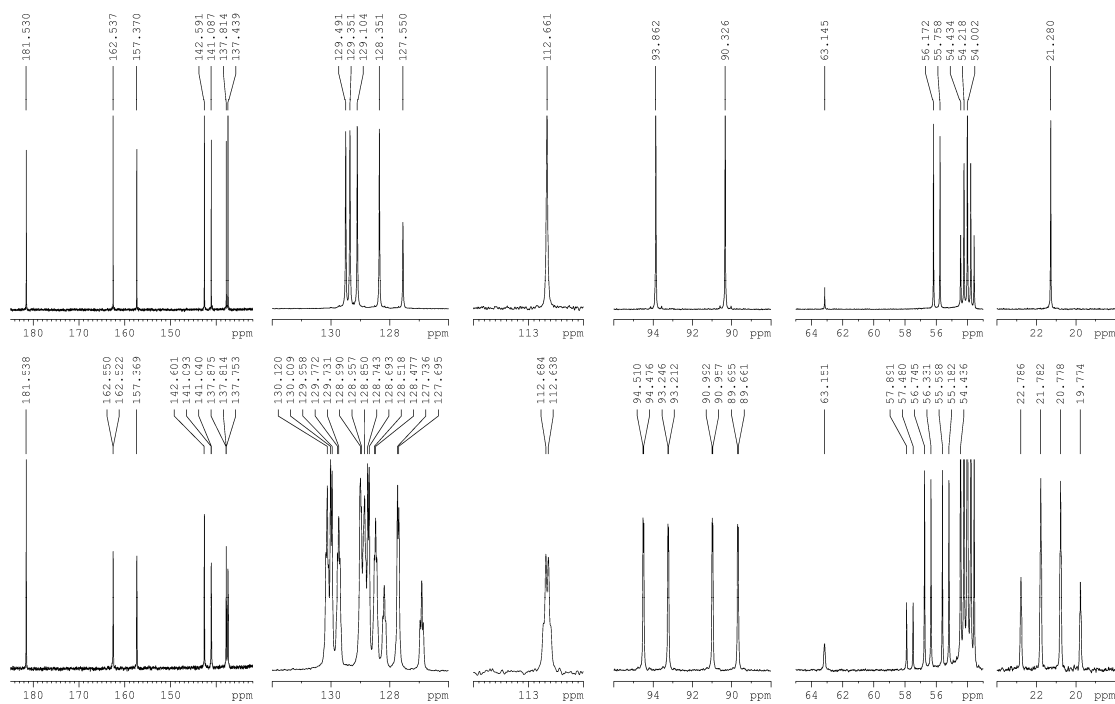

**Figure S39.**  $^{13}\text{C}\{^1\text{H}\}$  and  $^{13}\text{C}$  NMR spectra overlay of (+/-)-7 (125 MHz,  $\text{CD}_2\text{Cl}_2$ , 25 °C). Peak heights are normalized to emphasize splitting.

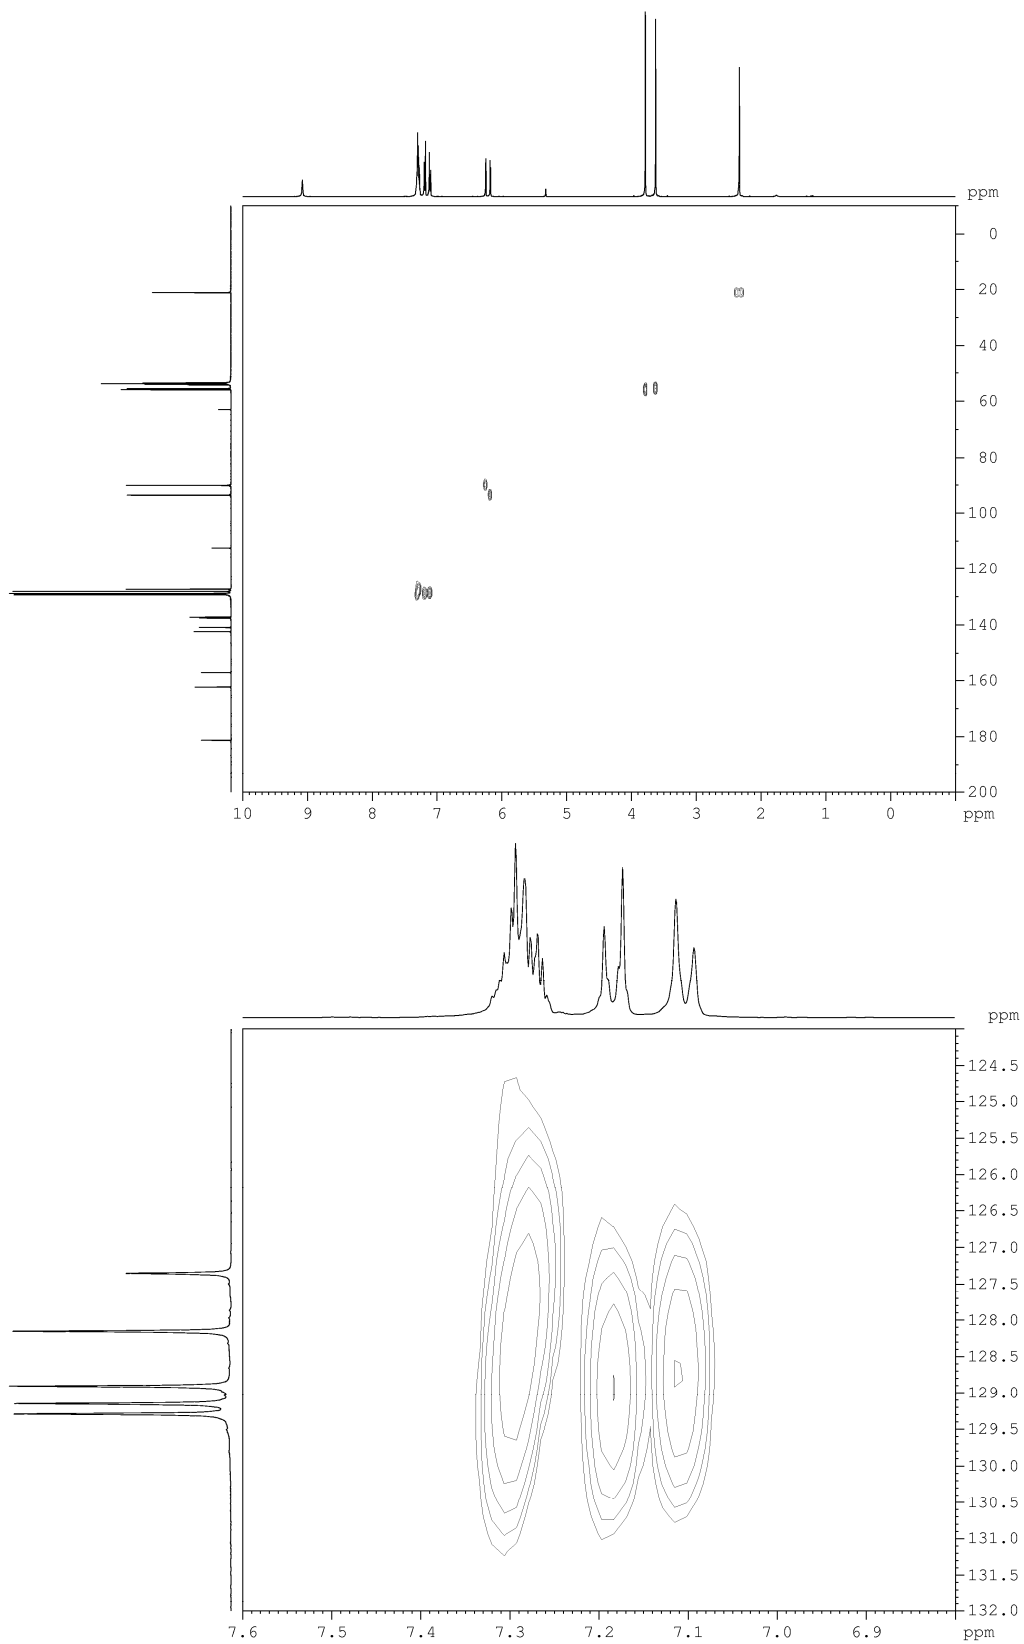

**Figure S40.**  $^1\text{H}$ - $^{13}\text{C}$  HSQC NMR spectrum of (+/-)-7 (125 MHz,  $\text{CD}_2\text{Cl}_2$ , 25 °C).

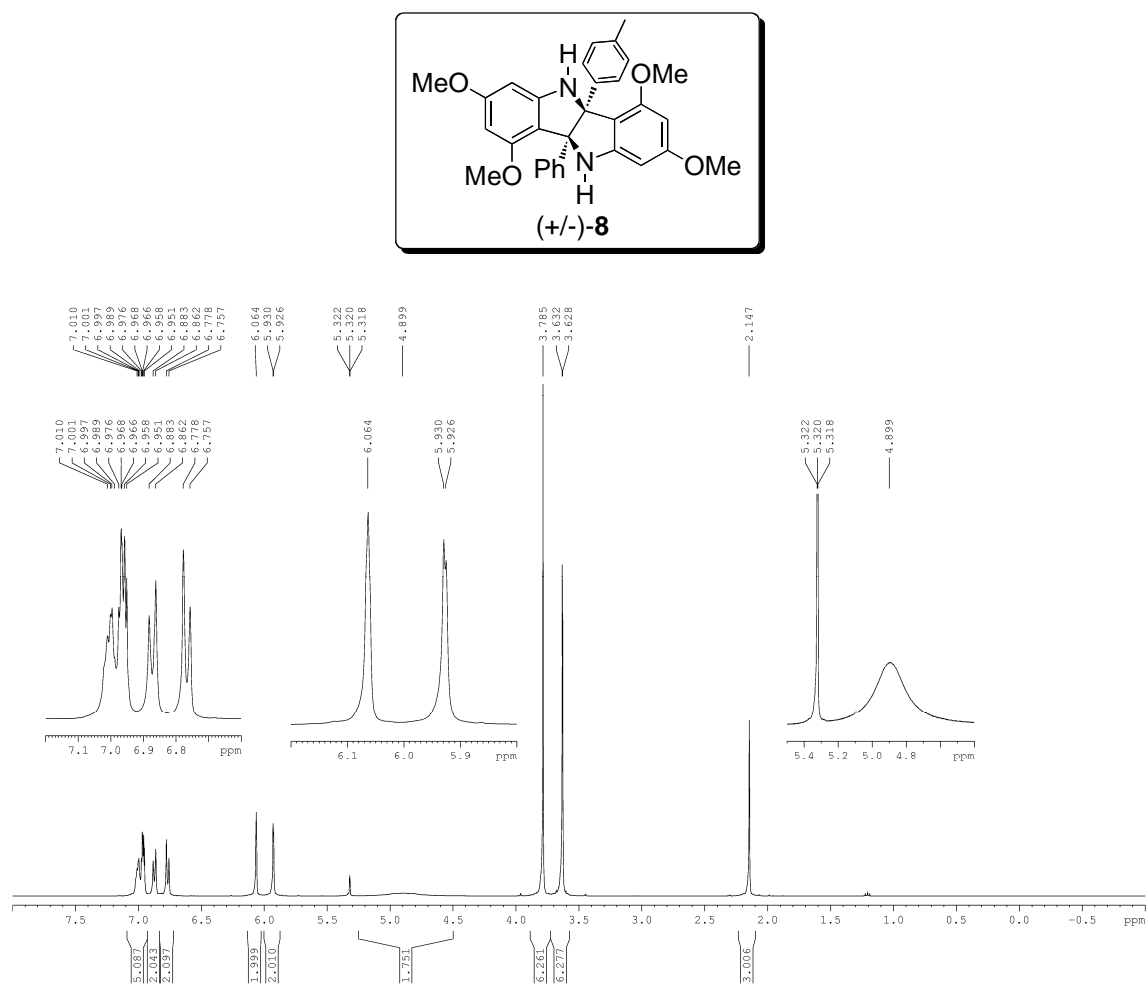

**Figure S41.**  $^1\text{H}$  NMR spectrum of (+/-)-8 (400 MHz,  $\text{CD}_2\text{Cl}_2$ , 25 °C).

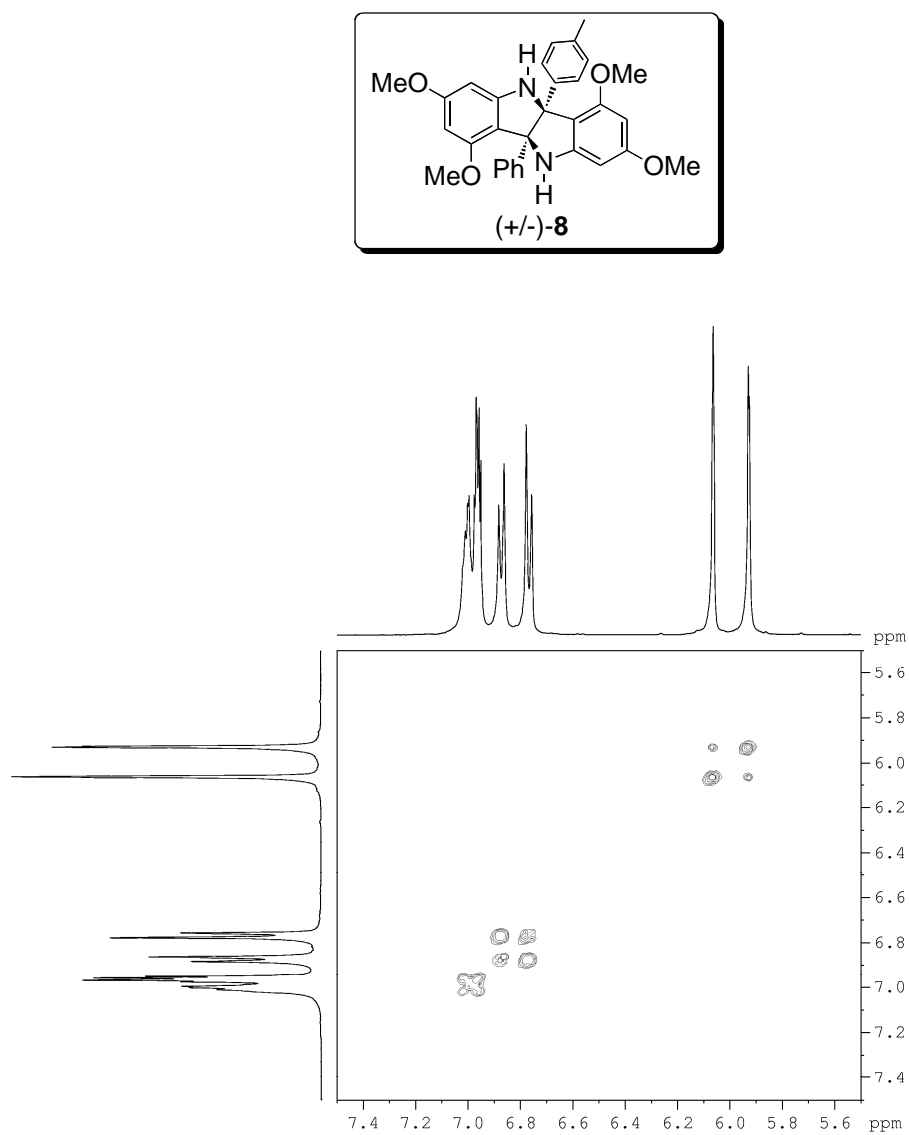

**Figure S42.** <sup>1</sup>H-<sup>1</sup>H COSY NMR spectrum of (+/-)-8 zoomed in on the aromatic region (400 MHz, CD<sub>2</sub>Cl<sub>2</sub>, 25 °C).

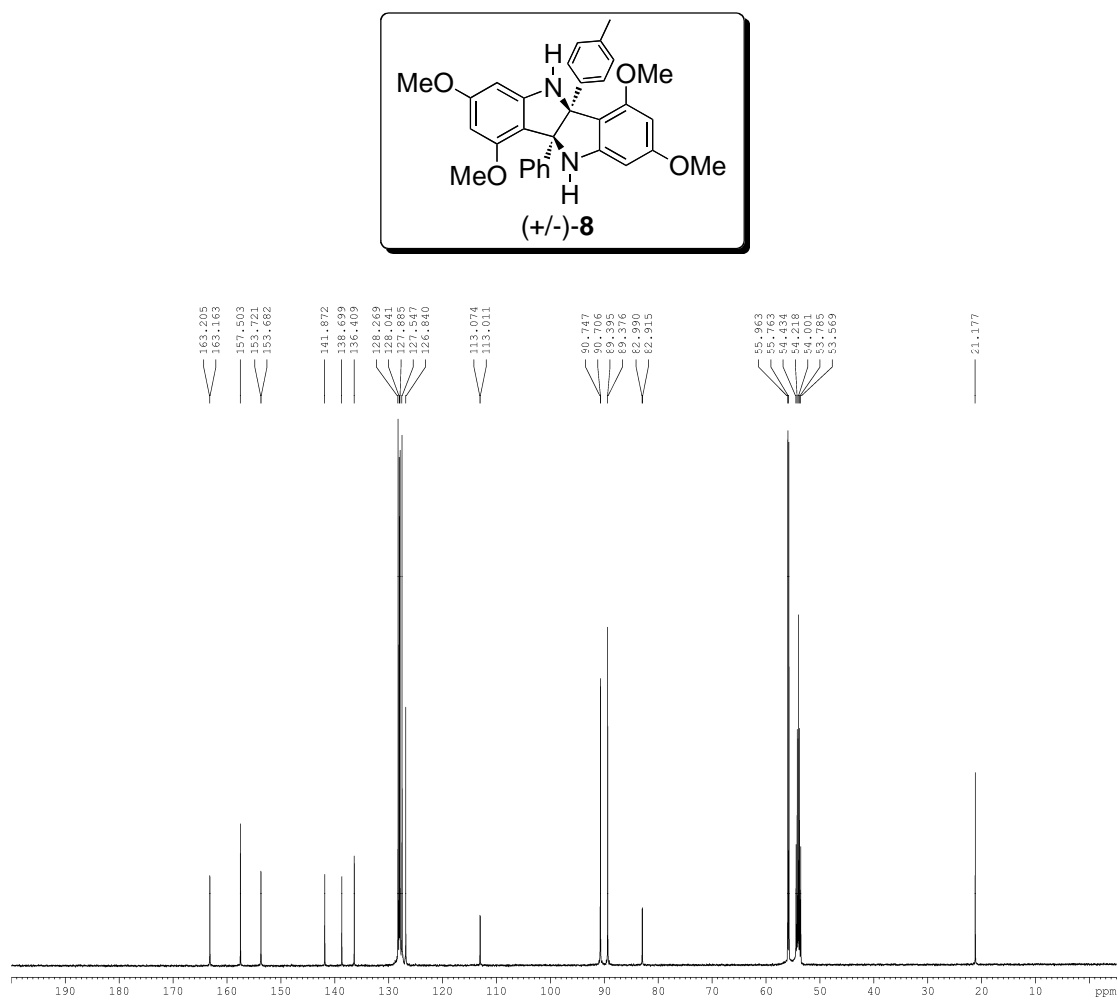

**Figure S43.** <sup>13</sup>C{<sup>1</sup>H} NMR spectrum of (+/-)-8 (125 MHz, CD<sub>2</sub>Cl<sub>2</sub>, 25 °C).

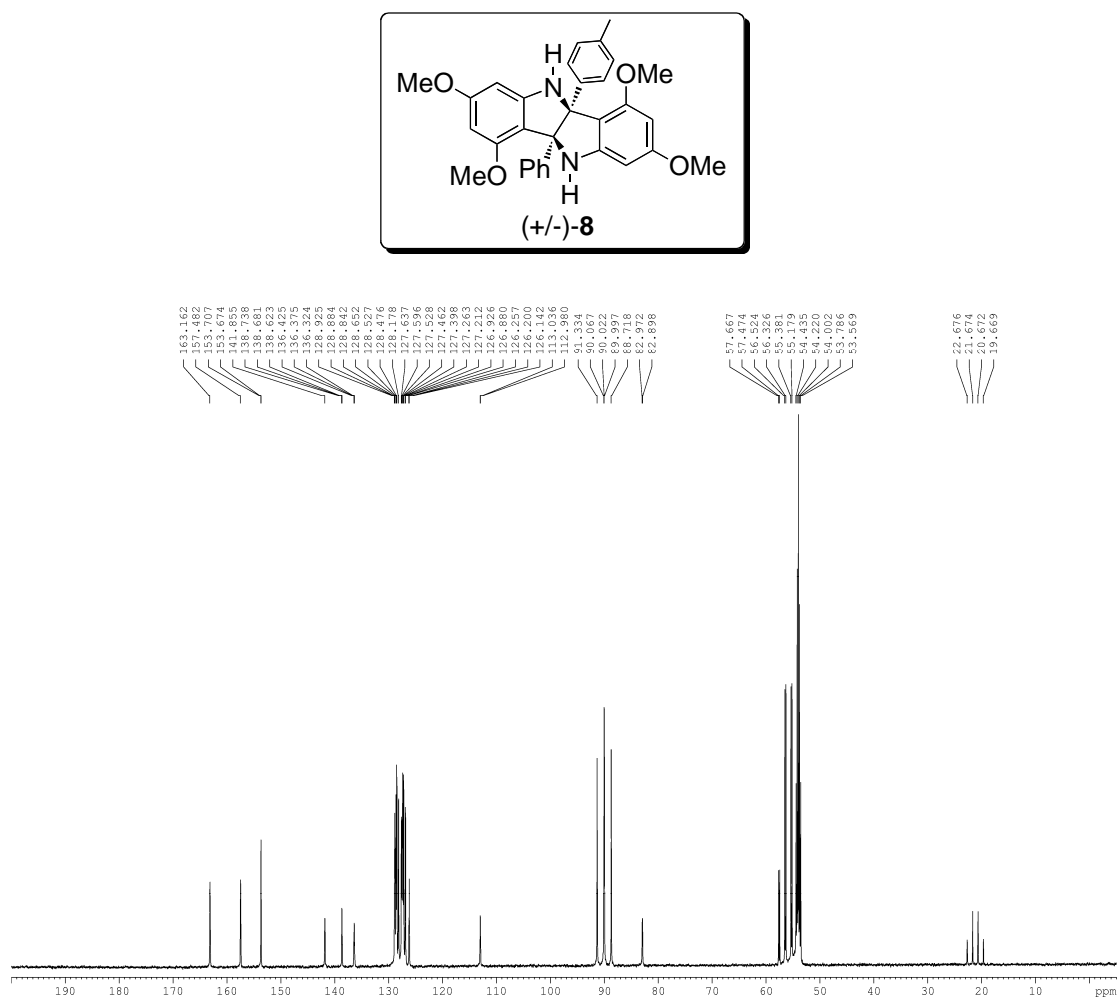

**Figure S44.** <sup>13</sup>C NMR spectrum of (+/-)-8 (125 MHz, CD<sub>2</sub>Cl<sub>2</sub>, 25 °C).



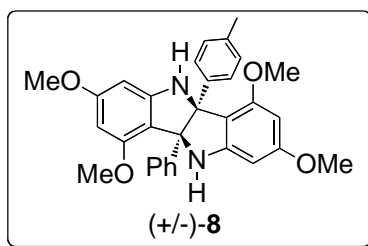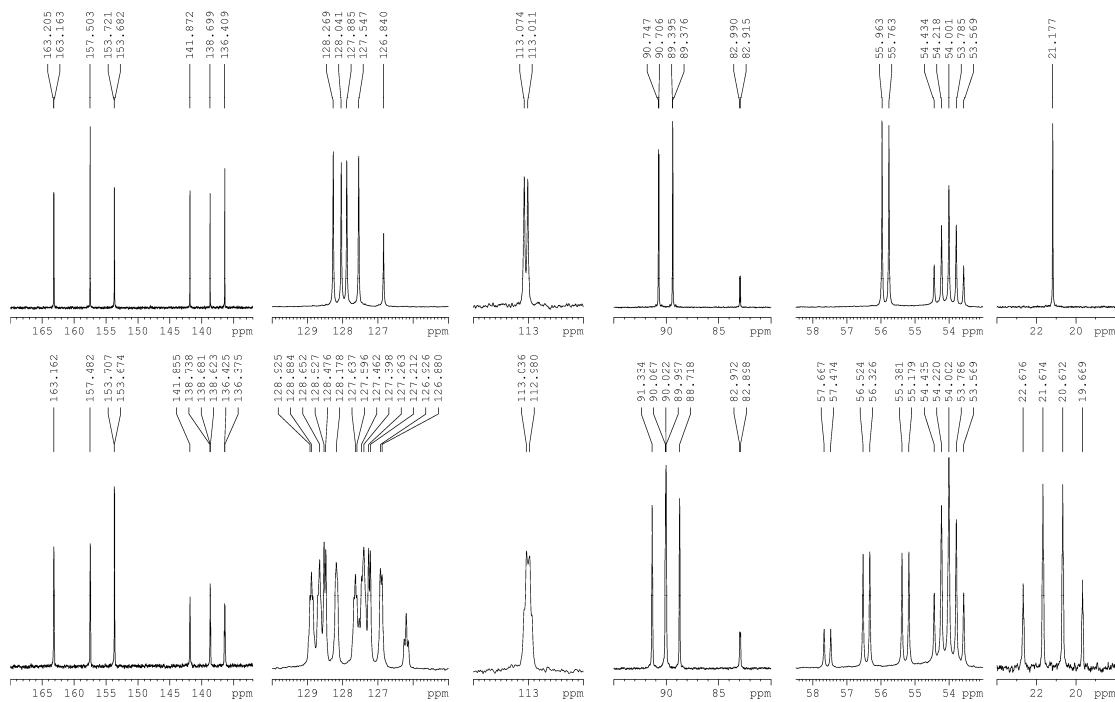

**Figure S45.**  $^{13}\text{C}\{^1\text{H}\}$  and  $^{13}\text{C}$  NMR spectra overlay of (+/-)-8 (125 MHz,  $\text{CD}_2\text{Cl}_2$ , 25 °C). Peak heights are normalized to emphasize splitting.

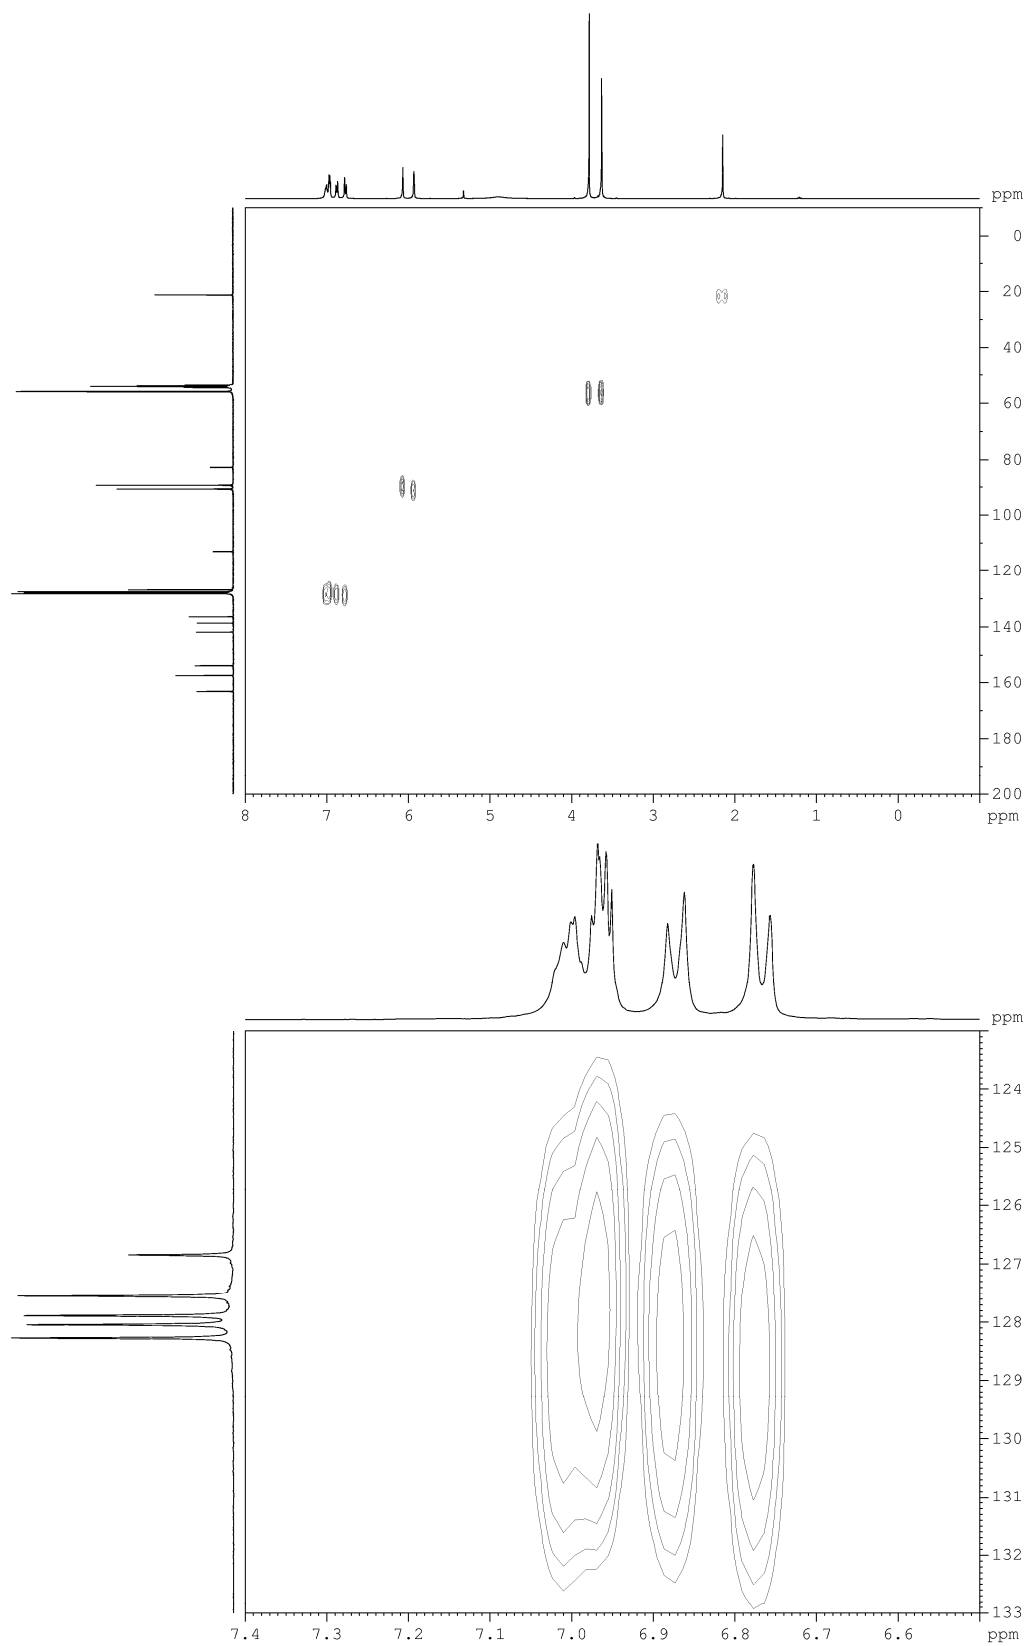

**Figure S46.**  $^1\text{H}$ - $^{13}\text{C}$  HSQC NMR spectrum of (+/-)-8 (125 MHz,  $\text{CD}_2\text{Cl}_2$ , 25 °C).

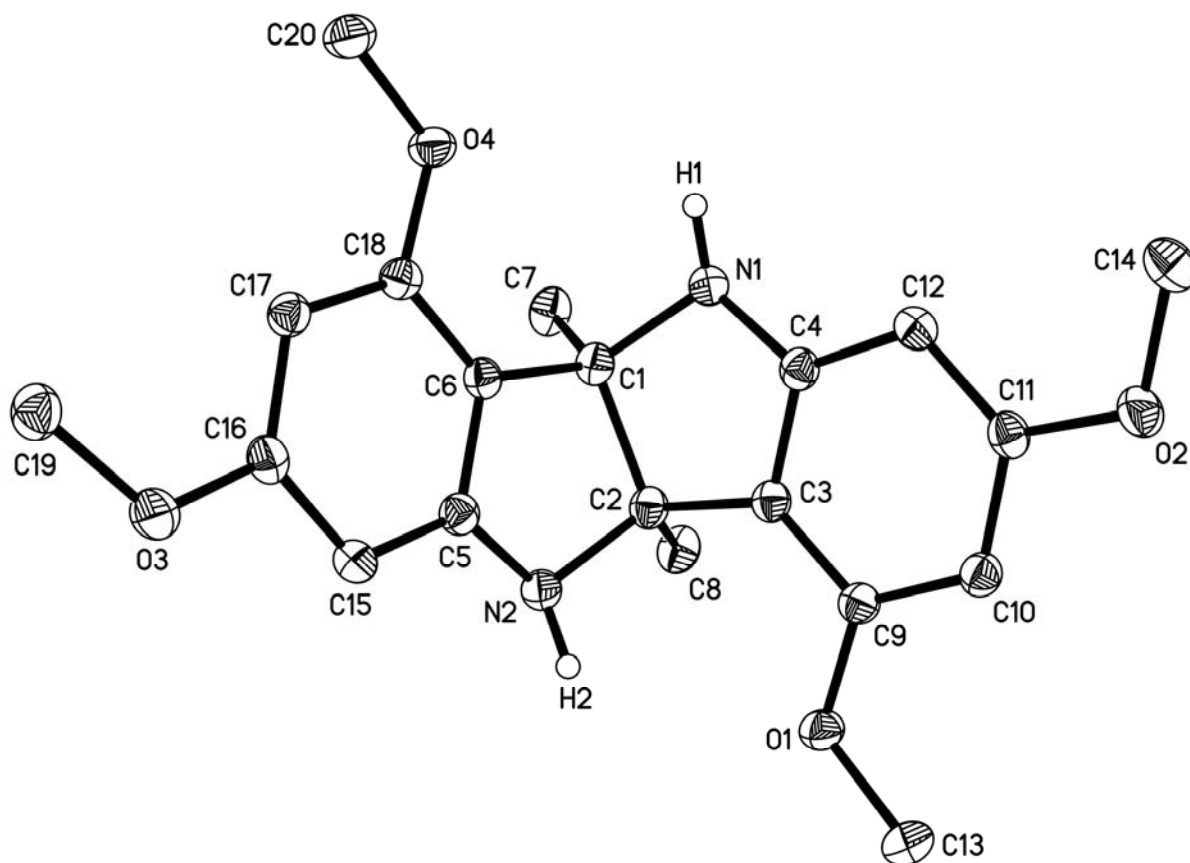

**Figure S47.** ORTEP diagram of **1** [*Pbca*] with thermal ellipsoids drawn at 50% probability level. Hydrogen atoms were omitted for clarity, except for H1 and H2, to emphasize valency of the nitrogen atoms.

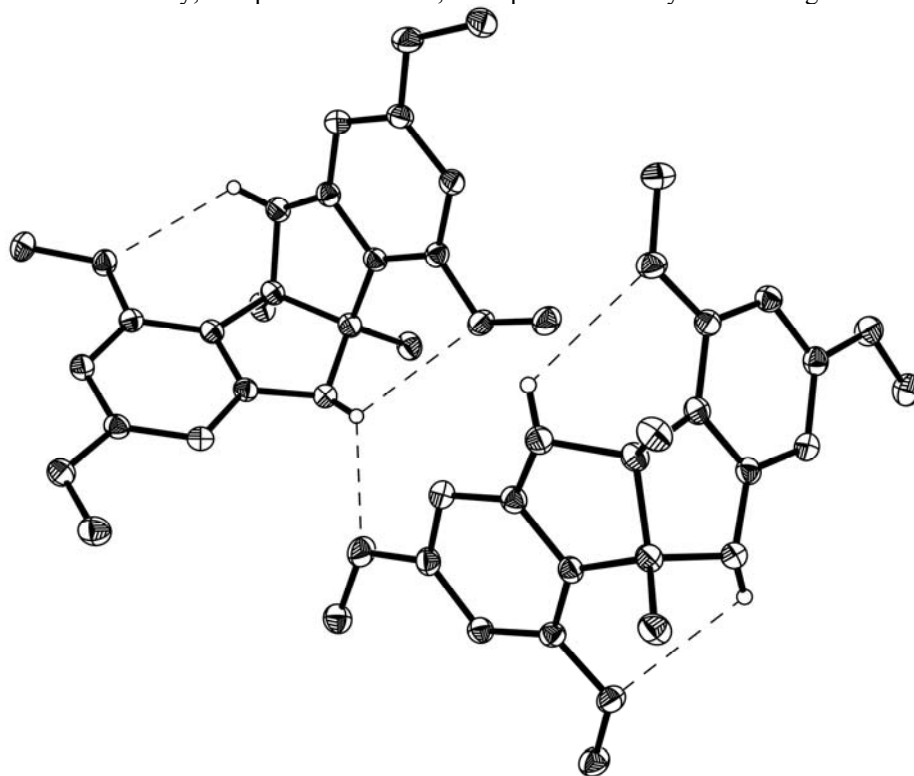

**Figure S48.** ORTEP diagram of **1** [*Pbca*] with thermal ellipsoids drawn at 50% probability level. Hydrogen atoms were omitted for clarity, except for H1, H2, H1A, and H2A, to emphasize intermolecular and intramolecular hydrogen bonding.

## Experimental Details for the Structure Determination of (+/-)-1 [*Pbca*].

### Data collection

A crystal (0.38 x 0.22 x 0.16 mm<sup>3</sup>) was placed onto the tip of a 0.1 mm diameter glass capillary tube or fiber and mounted on a Bruker SMART APEX II CCD Platform diffractometer for a data collection at 100.0(5) K.<sup>1</sup> A preliminary set of cell constants and an orientation matrix were calculated from reflections harvested from three orthogonal wedges of reciprocal space. The full data collection was carried out using MoK $\alpha$  radiation (graphite monochromator) with a frame time of 45 seconds and a detector distance of 4.01 cm. A randomly oriented region of reciprocal space was surveyed: four major sections of frames were collected with 0.50° steps in  $\omega$  at four different  $\phi$  settings and a detector position of -38° in  $2\theta$ . The intensity data were corrected for absorption.<sup>2</sup> Final cell constants were calculated from the xyz centroids of 3990 strong reflections from the actual data collection after integration.<sup>3</sup> See Table S1 for additional crystal and refinement information.

### Structure solution and refinement

The structure was solved using SIR97<sup>4</sup> and refined using SHELXL-97.<sup>5</sup> The space group *Pbca* was determined based on systematic absences. A direct-methods solution was calculated which provided most non-hydrogen atoms from the E-map. Full-matrix least squares / difference Fourier cycles were performed which located the remaining non-hydrogen atoms. All non-hydrogen atoms were refined with anisotropic displacement parameters. All hydrogen atoms were found from the difference Fourier map, and their positional and isotropic displacement parameters were refined independently from those of their respective bonded atoms. The final full matrix least squares refinement converged to  $R1 = 0.0527$  ( $F^2$ ,  $I > 2\sigma(I)$ ) and  $wR2 = 0.1465$  ( $F^2$ , all data).

### Structure description

The structure is the one suggested, with all atoms in general positions. Weak intermolecular and intramolecular hydrogen bonding is observed (see Figure S48 and Table S7).

### References

<sup>1</sup> APEX2, version 2011.4-1; Bruker AXS: Madison, WI, 2011.

<sup>2</sup> Sheldrick, G. M. *SADABS*, version 2008/1; University of Göttingen: Göttingen, Germany, 2008.

<sup>3</sup> *SAINT*, version 7.68A; Bruker AXS: Madison, WI, 2009.

<sup>4</sup> Altomare, A.; Burla, M. C.; Camalli, M.; Cascarano, G. L.; Giacovazzo, C.; Guagliardi, A.; Moliterni, A. G. G.; Polidori, G.; Spagna, R. *SIR97: A new program for solving and refining crystal structures*; Istituto di Cristallografia, CNR: Bari, Italy, 1999.

<sup>5</sup> Sheldrick, G. M. *Acta. Cryst.* **2008**, *A64*, 112-122.

### Some equations of interest:

$$R_{\text{int}} = \frac{\sum |F_o^2 - \langle F_o^2 \rangle|}{\sum F_o^2}$$
$$R1 = \frac{\sum ||F_o| - |F_c||}{\sum |F_o|}$$
$$wR2 = \frac{[\sum [w(F_o^2 - F_c^2)^2]]}{[\sum [w(F_o^2)^2]]^{1/2}}$$

where  $w = 1 / [\sigma^2(F_o^2) + (aP)^2 + bP]$  and

$$P = 1/3 \max(0, F_o^2) + 2/3 F_c^2$$
$$\text{Goof} = S = \frac{[\sum [w(F_o^2 - F_c^2)^2]]}{(m-n)^{1/2}}$$

where  $m$  = number of reflections and  $n$  = number of parameters

**Table S1.** Crystal data and structure refinement for (+/-)-**1** [*Pbca*].

|                                                     |                                                               |                     |
|-----------------------------------------------------|---------------------------------------------------------------|---------------------|
| Identification code                                 | (±)- <b>1</b> , JONJK66                                       |                     |
| Empirical formula                                   | C <sub>20</sub> H <sub>24</sub> N <sub>2</sub> O <sub>4</sub> |                     |
| Formula weight                                      | 356.41                                                        |                     |
| Temperature                                         | 100.0(5) K                                                    |                     |
| Wavelength                                          | 0.71073 Å                                                     |                     |
| Crystal system                                      | Orthorhombic                                                  |                     |
| Space group                                         | <i>Pbca</i>                                                   |                     |
| Unit cell dimensions                                | <i>a</i> = 12.226(2) Å                                        | $\alpha = 90^\circ$ |
|                                                     | <i>b</i> = 15.112(3) Å                                        | $\beta = 90^\circ$  |
|                                                     | <i>c</i> = 18.934(3) Å                                        | $\gamma = 90^\circ$ |
| Volume                                              | 3498.3(10) Å <sup>3</sup>                                     |                     |
| <i>Z</i>                                            | 8                                                             |                     |
| Density (calculated)                                | 1.353 Mg/m <sup>3</sup>                                       |                     |
| Absorption coefficient                              | 0.095 mm <sup>-1</sup>                                        |                     |
| <i>F</i> (000)                                      | 1520                                                          |                     |
| Crystal color, morphology                           | colorless, needle                                             |                     |
| Crystal size                                        | 0.38 x 0.22 x 0.16 mm <sup>3</sup>                            |                     |
| Theta range for data collection                     | 2.15 to 34.97°                                                |                     |
| Index ranges                                        | -19 ≤ <i>h</i> ≤ 19, -24 ≤ <i>k</i> ≤ 24, -30 ≤ <i>l</i> ≤ 30 |                     |
| Reflections collected                               | 72057                                                         |                     |
| Independent reflections                             | 7695 [ <i>R</i> (int) = 0.0924]                               |                     |
| Observed reflections                                | 4947                                                          |                     |
| Completeness to theta = 34.97°                      | 100.0%                                                        |                     |
| Absorption correction                               | Multi-scan                                                    |                     |
| Max. and min. transmission                          | 0.9850 and 0.9649                                             |                     |
| Refinement method                                   | Full-matrix least-squares on <i>F</i> <sup>2</sup>            |                     |
| Data / restraints / parameters                      | 7695 / 0 / 331                                                |                     |
| Goodness-of-fit on <i>F</i> <sup>2</sup>            | 1.036                                                         |                     |
| Final <i>R</i> indices [ <i>I</i> > 2σ( <i>I</i> )] | <i>R</i> 1 = 0.0527, <i>wR</i> 2 = 0.1255                     |                     |
| <i>R</i> indices (all data)                         | <i>R</i> 1 = 0.0914, <i>wR</i> 2 = 0.1465                     |                     |
| Largest diff. peak and hole                         | 0.502 and -0.238 e.Å <sup>-3</sup>                            |                     |

**Table S2.** Atomic coordinates ( $\times 10^4$ ) and equivalent isotropic displacement parameters ( $\text{\AA}^2 \times 10^3$ ) for (+/-)-**1** [*Pbca*].  $U_{\text{eq}}$  is defined as one third of the trace of the orthogonalized  $U_{ij}$  tensor.

|     | x        | y        | z       | $U_{\text{eq}}$ |
|-----|----------|----------|---------|-----------------|
| O1  | 7277(1)  | 990(1)   | 2950(1) | 21(1)           |
| O2  | 9610(1)  | -1185(1) | 3976(1) | 23(1)           |
| O3  | 7850(1)  | 4154(1)  | 5738(1) | 25(1)           |
| O4  | 11342(1) | 3374(1)  | 4678(1) | 21(1)           |
| N1  | 10767(1) | 1880(1)  | 3564(1) | 19(1)           |
| N2  | 8164(1)  | 2866(1)  | 3419(1) | 19(1)           |
| C1  | 10129(1) | 2695(1)  | 3429(1) | 18(1)           |
| C2  | 9036(1)  | 2344(1)  | 3072(1) | 18(1)           |
| C3  | 9054(1)  | 1380(1)  | 3293(1) | 17(1)           |
| C4  | 10055(1) | 1166(1)  | 3592(1) | 17(1)           |
| C5  | 8548(1)  | 3164(1)  | 4070(1) | 18(1)           |
| C6  | 9683(1)  | 3123(1)  | 4093(1) | 17(1)           |
| C7  | 10806(1) | 3329(1)  | 2979(1) | 23(1)           |
| C8  | 8956(1)  | 2465(1)  | 2275(1) | 23(1)           |
| C9  | 8259(1)  | 726(1)   | 3228(1) | 17(1)           |
| C10 | 8475(1)  | -134(1)  | 3451(1) | 19(1)           |
| C11 | 9486(1)  | -323(1)  | 3763(1) | 18(1)           |
| C12 | 10291(1) | 317(1)   | 3850(1) | 19(1)           |
| C13 | 6430(1)  | 341(1)   | 2924(1) | 23(1)           |
| C14 | 10566(1) | -1387(1) | 4376(1) | 25(1)           |
| C15 | 7932(1)  | 3505(1)  | 4625(1) | 20(1)           |
| C16 | 8500(1)  | 3832(1)  | 5205(1) | 19(1)           |
| C17 | 9639(1)  | 3823(1)  | 5242(1) | 18(1)           |
| C18 | 10227(1) | 3453(1)  | 4682(1) | 17(1)           |
| C19 | 8366(1)  | 4632(1)  | 6291(1) | 24(1)           |
| C20 | 11907(1) | 3679(1)  | 5291(1) | 24(1)           |

**Table S3.** Bond lengths [Å] and angles [°] for (+/-)-**1** [*Pbca*].

|             |            |                  |            |
|-------------|------------|------------------|------------|
| O(1)-C(9)   | 1.3704(14) | C(12)-H(12)      | 0.943(16)  |
| O(1)-C(13)  | 1.4271(15) | C(13)-H(13A)     | 0.952(17)  |
| O(2)-C(11)  | 1.3724(14) | C(13)-H(13B)     | 1.000(19)  |
| O(2)-C(14)  | 1.4256(16) | C(13)-H(13C)     | 0.967(18)  |
| O(3)-C(16)  | 1.3732(14) | C(14)-H(14A)     | 0.967(17)  |
| O(3)-C(19)  | 1.4202(16) | C(14)-H(14B)     | 0.999(19)  |
| O(4)-C(18)  | 1.3693(14) | C(14)-H(14C)     | 1.003(17)  |
| O(4)-C(20)  | 1.4264(16) | C(15)-C(16)      | 1.3901(17) |
| N(1)-C(4)   | 1.3889(15) | C(15)-H(15)      | 1.010(16)  |
| N(1)-C(1)   | 1.4798(16) | C(16)-C(17)      | 1.3949(17) |
| N(1)-H(1)   | 0.878(19)  | C(17)-C(18)      | 1.3984(16) |
| N(2)-C(5)   | 1.3952(15) | C(17)-H(17)      | 0.969(15)  |
| N(2)-C(2)   | 1.4810(16) | C(19)-H(19A)     | 0.989(19)  |
| N(2)-H(2)   | 0.862(17)  | C(19)-H(19B)     | 0.980(18)  |
| C(1)-C(6)   | 1.5162(16) | C(19)-H(19C)     | 0.982(17)  |
| C(1)-C(7)   | 1.5260(17) | C(20)-H(20A)     | 0.950(17)  |
| C(1)-C(2)   | 1.5885(16) | C(20)-H(20B)     | 1.017(17)  |
| C(2)-C(3)   | 1.5161(17) | C(20)-H(20C)     | 0.974(18)  |
| C(2)-C(8)   | 1.5231(17) | C(9)-O(1)-C(13)  | 116.66(10) |
| C(3)-C(4)   | 1.3862(16) | C(11)-O(2)-C(14) | 116.78(10) |
| C(3)-C(9)   | 1.3917(16) | C(16)-O(3)-C(19) | 117.68(10) |
| C(4)-C(12)  | 1.4017(17) | C(18)-O(4)-C(20) | 116.76(9)  |
| C(5)-C(6)   | 1.3900(17) | C(4)-N(1)-C(1)   | 108.82(9)  |
| C(5)-C(15)  | 1.3916(17) | C(4)-N(1)-H(1)   | 117.0(11)  |
| C(6)-C(18)  | 1.3892(16) | C(1)-N(1)-H(1)   | 118.5(11)  |
| C(7)-H(7A)  | 0.985(17)  | C(5)-N(2)-C(2)   | 108.74(9)  |
| C(7)-H(7B)  | 0.999(17)  | C(5)-N(2)-H(2)   | 117.2(11)  |
| C(7)-H(7C)  | 1.029(17)  | C(2)-N(2)-H(2)   | 112.8(11)  |
| C(8)-H(8A)  | 0.969(17)  | N(1)-C(1)-C(6)   | 113.62(10) |
| C(8)-H(8B)  | 0.976(16)  | N(1)-C(1)-C(7)   | 109.42(10) |
| C(8)-H(8C)  | 0.978(17)  | C(6)-C(1)-C(7)   | 113.01(10) |
| C(9)-C(10)  | 1.3909(16) | N(1)-C(1)-C(2)   | 103.84(9)  |
| C(10)-C(11) | 1.3997(17) | C(6)-C(1)-C(2)   | 101.15(9)  |
| C(10)-H(10) | 0.977(16)  | C(7)-C(1)-C(2)   | 115.36(10) |
| C(11)-C(12) | 1.3900(17) | N(2)-C(2)-C(3)   | 113.59(10) |

|                   |            |                     |            |
|-------------------|------------|---------------------|------------|
| N(2)-C(2)-C(8)    | 109.18(10) | C(12)-C(11)-C(10)   | 122.26(11) |
| C(3)-C(2)-C(8)    | 112.99(10) | C(11)-C(12)-C(4)    | 116.69(11) |
| N(2)-C(2)-C(1)    | 103.83(9)  | C(11)-C(12)-H(12)   | 123.1(10)  |
| C(3)-C(2)-C(1)    | 101.04(9)  | C(4)-C(12)-H(12)    | 120.2(10)  |
| C(8)-C(2)-C(1)    | 115.80(10) | O(1)-C(13)-H(13A)   | 104.4(10)  |
| C(4)-C(3)-C(9)    | 119.14(11) | O(1)-C(13)-H(13B)   | 113.1(10)  |
| C(4)-C(3)-C(2)    | 110.47(10) | H(13A)-C(13)-H(13B) | 112.5(14)  |
| C(9)-C(3)-C(2)    | 130.38(10) | O(1)-C(13)-H(13C)   | 111.3(10)  |
| C(3)-C(4)-N(1)    | 110.88(10) | H(13A)-C(13)-H(13C) | 111.5(15)  |
| C(3)-C(4)-C(12)   | 122.51(11) | H(13B)-C(13)-H(13C) | 104.2(14)  |
| N(1)-C(4)-C(12)   | 126.53(11) | O(2)-C(14)-H(14A)   | 106.4(10)  |
| C(6)-C(5)-C(15)   | 122.24(11) | O(2)-C(14)-H(14B)   | 111.1(11)  |
| C(6)-C(5)-N(2)    | 110.48(10) | H(14A)-C(14)-H(14B) | 108.1(15)  |
| C(15)-C(5)-N(2)   | 127.20(11) | O(2)-C(14)-H(14C)   | 111.0(10)  |
| C(18)-C(6)-C(5)   | 119.12(11) | H(14A)-C(14)-H(14C) | 108.2(14)  |
| C(18)-C(6)-C(1)   | 130.28(11) | H(14B)-C(14)-H(14C) | 111.9(15)  |
| C(5)-C(6)-C(1)    | 110.60(10) | C(16)-C(15)-C(5)    | 117.20(11) |
| C(1)-C(7)-H(7A)   | 108.7(9)   | C(16)-C(15)-H(15)   | 121.8(9)   |
| C(1)-C(7)-H(7B)   | 110.7(10)  | C(5)-C(15)-H(15)    | 121.0(10)  |
| H(7A)-C(7)-H(7B)  | 111.4(14)  | O(3)-C(16)-C(15)    | 114.63(11) |
| C(1)-C(7)-H(7C)   | 110.0(9)   | O(3)-C(16)-C(17)    | 122.98(11) |
| H(7A)-C(7)-H(7C)  | 107.3(13)  | C(15)-C(16)-C(17)   | 122.38(11) |
| H(7B)-C(7)-H(7C)  | 108.7(13)  | C(16)-C(17)-C(18)   | 118.58(11) |
| C(2)-C(8)-H(8A)   | 111.5(10)  | C(16)-C(17)-H(17)   | 122.2(9)   |
| C(2)-C(8)-H(8B)   | 110.5(9)   | C(18)-C(17)-H(17)   | 119.2(9)   |
| H(8A)-C(8)-H(8B)  | 109.4(14)  | O(4)-C(18)-C(6)     | 116.21(10) |
| C(2)-C(8)-H(8C)   | 113.2(10)  | O(4)-C(18)-C(17)    | 123.35(10) |
| H(8A)-C(8)-H(8C)  | 105.9(14)  | C(6)-C(18)-C(17)    | 120.43(11) |
| H(8B)-C(8)-H(8C)  | 106.2(13)  | O(3)-C(19)-H(19A)   | 103.9(11)  |
| O(1)-C(9)-C(10)   | 123.71(10) | O(3)-C(19)-H(19B)   | 109.6(10)  |
| O(1)-C(9)-C(3)    | 116.02(10) | H(19A)-C(19)-H(19B) | 109.5(15)  |
| C(10)-C(9)-C(3)   | 120.26(11) | O(3)-C(19)-H(19C)   | 110.5(9)   |
| C(9)-C(10)-C(11)  | 119.07(11) | H(19A)-C(19)-H(19C) | 112.1(15)  |
| C(9)-C(10)-H(10)  | 122.1(9)   | H(19B)-C(19)-H(19C) | 110.9(14)  |
| C(11)-C(10)-H(10) | 118.8(9)   | O(4)-C(20)-H(20A)   | 106.4(10)  |
| O(2)-C(11)-C(12)  | 123.18(11) | O(4)-C(20)-H(20B)   | 111.7(9)   |
| O(2)-C(11)-C(10)  | 114.55(10) | H(20A)-C(20)-H(20B) | 107.8(13)  |



|                     |           |                     |           |
|---------------------|-----------|---------------------|-----------|
| O(4)-C(20)-H(20C)   | 110.9(10) | H(20B)-C(20)-H(20C) | 109.9(13) |
| H(20A)-C(20)-H(20C) | 110.1(14) |                     |           |

**Table S4.** Anisotropic displacement parameters ( $\text{\AA}^2 \times 10^3$ ) for (+/-)-**1** [*Pbca*]. The anisotropic displacement factor exponent takes the form:  $-2\pi^2 [h^2 a^{*2} U_{11} + \dots + 2 h k a^* b^* U_{12}]$

|     | $U_{11}$ | $U_{22}$ | $U_{33}$ | $U_{23}$ | $U_{13}$ | $U_{12}$ |
|-----|----------|----------|----------|----------|----------|----------|
| O1  | 18(1)    | 20(1)    | 23(1)    | 1(1)     | -4(1)    | -1(1)    |
| O2  | 22(1)    | 17(1)    | 30(1)    | 5(1)     | 0(1)     | 2(1)     |
| O3  | 21(1)    | 32(1)    | 23(1)    | -8(1)    | 4(1)     | 2(1)     |
| O4  | 16(1)    | 26(1)    | 20(1)    | -3(1)    | 0(1)     | -1(1)    |
| N1  | 16(1)    | 17(1)    | 24(1)    | -2(1)    | 0(1)     | 0(1)     |
| N2  | 19(1)    | 18(1)    | 20(1)    | -1(1)    | -3(1)    | 1(1)     |
| C1  | 20(1)    | 17(1)    | 18(1)    | 0(1)     | 1(1)     | -1(1)    |
| C2  | 21(1)    | 17(1)    | 17(1)    | 0(1)     | 0(1)     | 0(1)     |
| C3  | 19(1)    | 17(1)    | 15(1)    | -1(1)    | 0(1)     | 0(1)     |
| C4  | 18(1)    | 17(1)    | 16(1)    | -2(1)    | 2(1)     | 0(1)     |
| C5  | 19(1)    | 15(1)    | 18(1)    | 1(1)     | -1(1)    | 0(1)     |
| C6  | 18(1)    | 14(1)    | 18(1)    | 0(1)     | 1(1)     | 0(1)     |
| C7  | 27(1)    | 21(1)    | 21(1)    | 0(1)     | 6(1)     | -4(1)    |
| C8  | 30(1)    | 22(1)    | 17(1)    | 1(1)     | -2(1)    | -2(1)    |
| C9  | 18(1)    | 19(1)    | 15(1)    | -2(1)    | -1(1)    | 0(1)     |
| C10 | 19(1)    | 17(1)    | 20(1)    | 0(1)     | 1(1)     | -1(1)    |
| C11 | 20(1)    | 16(1)    | 19(1)    | 2(1)     | 3(1)     | 2(1)     |
| C12 | 18(1)    | 19(1)    | 19(1)    | 0(1)     | 1(1)     | 2(1)     |
| C13 | 20(1)    | 26(1)    | 23(1)    | -1(1)    | -3(1)    | -4(1)    |
| C14 | 26(1)    | 23(1)    | 26(1)    | 4(1)     | -1(1)    | 5(1)     |
| C15 | 18(1)    | 19(1)    | 22(1)    | -1(1)    | 0(1)     | 2(1)     |
| C16 | 20(1)    | 17(1)    | 20(1)    | -1(1)    | 3(1)     | 1(1)     |
| C17 | 19(1)    | 18(1)    | 18(1)    | -2(1)    | 1(1)     | 0(1)     |
| C18 | 17(1)    | 16(1)    | 18(1)    | 2(1)     | 0(1)     | -1(1)    |
| C19 | 26(1)    | 25(1)    | 20(1)    | -4(1)    | 2(1)     | 0(1)     |
| C20 | 19(1)    | 31(1)    | 23(1)    | -4(1)    | -3(1)    | 0(1)     |

**Table S5.** Hydrogen coordinates ( $\times 10^4$ ) and isotropic displacement parameters ( $\text{\AA}^2 \times 10^3$ ) for (+/-)-**1** [*Pbca*].

|      | x         | y         | z        | $U_{\text{eq}}$ |
|------|-----------|-----------|----------|-----------------|
| H1   | 11290(15) | 1898(11)  | 3881(9)  | 31(4)           |
| H2   | 7539(14)  | 2603(11)  | 3414(9)  | 27(4)           |
| H7A  | 11485(14) | 3472(11)  | 3234(9)  | 26(4)           |
| H7B  | 10379(13) | 3874(12)  | 2866(9)  | 29(4)           |
| H7C  | 11027(13) | 3027(11)  | 2513(9)  | 27(4)           |
| H8A  | 8275(14)  | 2231(11)  | 2091(9)  | 30(4)           |
| H8B  | 9569(13)  | 2175(11)  | 2039(8)  | 22(4)           |
| H8C  | 8979(13)  | 3086(11)  | 2129(9)  | 25(4)           |
| H10  | 7934(13)  | -607(10)  | 3410(8)  | 23(4)           |
| H12  | 10966(13) | 204(10)   | 4074(9)  | 21(4)           |
| H13A | 5822(13)  | 645(12)   | 2724(10) | 30(4)           |
| H13B | 6260(14)  | 79(12)    | 3396(10) | 33(5)           |
| H13C | 6643(14)  | -160(12)  | 2637(9)  | 33(4)           |
| H14A | 10517(14) | -2007(11) | 4496(9)  | 27(4)           |
| H14B | 10586(15) | -1040(12) | 4825(10) | 37(5)           |
| H14C | 11244(14) | -1296(11) | 4087(9)  | 27(4)           |
| H15  | 7107(13)  | 3509(10)  | 4605(9)  | 24(4)           |
| H17  | 10033(13) | 4060(10)  | 5644(8)  | 21(4)           |
| H19A | 7749(15)  | 4873(12)  | 6569(10) | 37(5)           |
| H19B | 8792(14)  | 5121(12)  | 6091(9)  | 30(4)           |
| H19C | 8833(13)  | 4238(11)  | 6572(9)  | 24(4)           |
| H20A | 12649(14) | 3505(11)  | 5236(9)  | 26(4)           |
| H20B | 11617(13) | 3389(10)  | 5738(9)  | 24(4)           |
| H20C | 11857(14) | 4320(12)  | 5332(9)  | 30(4)           |

**Table S6.** Torsion angles [°] for (+/-)-**1** [*Pbca*].

|               |             |                 |             |
|---------------|-------------|-----------------|-------------|
| C4-N1-C1-C6   | 86.33(12)   | C2-C1-C6-C18    | 170.44(12)  |
| C4-N1-C1-C7   | -146.32(10) | N1-C1-C6-C5     | -119.97(11) |
| C4-N1-C1-C2   | -22.64(12)  | C7-C1-C6-C5     | 114.58(11)  |
| C5-N2-C2-C3   | 85.49(12)   | C2-C1-C6-C5     | -9.34(12)   |
| C5-N2-C2-C8   | -147.41(10) | C13-O1-C9-C10   | 2.66(16)    |
| C5-N2-C2-C1   | -23.33(12)  | C13-O1-C9-C3    | -175.97(10) |
| N1-C1-C2-N2   | 137.03(9)   | C4-C3-C9-O1     | 177.78(10)  |
| C6-C1-C2-N2   | 19.04(11)   | C2-C3-C9-O1     | -3.53(18)   |
| C7-C1-C2-N2   | -103.26(11) | C4-C3-C9-C10    | -0.91(17)   |
| N1-C1-C2-C3   | 19.12(11)   | C2-C3-C9-C10    | 177.79(11)  |
| C6-C1-C2-C3   | -98.86(10)  | O1-C9-C10-C11   | -176.46(11) |
| C7-C1-C2-C3   | 138.84(10)  | C3-C9-C10-C11   | 2.12(17)    |
| N1-C1-C2-C8   | -103.31(11) | C14-O2-C11-C12  | 7.41(17)    |
| C6-C1-C2-C8   | 138.70(10)  | C14-O2-C11-C10  | -172.33(11) |
| C7-C1-C2-C8   | 16.40(15)   | C9-C10-C11-O2   | 178.88(10)  |
| N2-C2-C3-C4   | -120.76(11) | C9-C10-C11-C12  | -0.87(18)   |
| C8-C2-C3-C4   | 114.16(12)  | O2-C11-C12-C4   | 178.74(11)  |
| C1-C2-C3-C4   | -10.21(12)  | C10-C11-C12-C4  | -1.53(17)   |
| N2-C2-C3-C9   | 60.46(16)   | C3-C4-C12-C11   | 2.82(17)    |
| C8-C2-C3-C9   | -64.62(16)  | N1-C4-C12-C11   | -173.79(11) |
| C1-C2-C3-C9   | 171.01(12)  | C6-C5-C15-C16   | 1.74(17)    |
| C9-C3-C4-N1   | 175.44(10)  | N2-C5-C15-C16   | -174.67(11) |
| C2-C3-C4-N1   | -3.50(13)   | C19-O3-C16-C15  | -169.52(11) |
| C9-C3-C4-C12  | -1.65(17)   | C19-O3-C16-C17  | 11.09(17)   |
| C2-C3-C4-C12  | 179.41(10)  | C5-C15-C16-O3   | -179.53(10) |
| C1-N1-C4-C3   | 17.14(13)   | C5-C15-C16-C17  | -0.14(18)   |
| C1-N1-C4-C12  | -165.92(11) | O3-C16-C17-C18  | 177.83(11)  |
| C2-N2-C5-C6   | 18.41(13)   | C15-C16-C17-C18 | -1.51(18)   |
| C2-N2-C5-C15  | -164.83(11) | C20-O4-C18-C6   | -177.66(11) |
| C15-C5-C6-C18 | -1.63(17)   | C20-O4-C18-C17  | 0.96(16)    |
| N2-C5-C6-C18  | 175.32(10)  | C5-C6-C18-O4    | 178.54(10)  |
| C15-C5-C6-C1  | 178.18(10)  | C1-C6-C18-O4    | -1.23(17)   |
| N2-C5-C6-C1   | -4.87(13)   | C5-C6-C18-C17   | -0.12(17)   |
| N1-C1-C6-C18  | 59.82(16)   | C1-C6-C18-C17   | -179.88(11) |
| C7-C1-C6-C18  | -65.63(16)  | C16-C17-C18-O4  | -176.93(11) |

C16-C17-C18-C6                      1.63(17)

---

**Table S7.** Hydrogen bonds and close contacts for (+/-)-**1** [*Pbca*] [Å and °].

| D-H...A      | d(D-H)    | d(H...A)  | d(D...A)   | <(DHA)    |
|--------------|-----------|-----------|------------|-----------|
| N1-H1...O4   | 0.878(19) | 2.694(17) | 3.1685(14) | 115.2(14) |
| N1-H1...O3#1 | 0.878(19) | 2.585(18) | 3.2670(15) | 135.2(14) |
| N2-H2...O1   | 0.862(17) | 2.609(17) | 3.1618(14) | 122.9(14) |

Symmetry transformations used to generate equivalent atoms:

#1  $x+1/2, -y+1/2, -z+1$

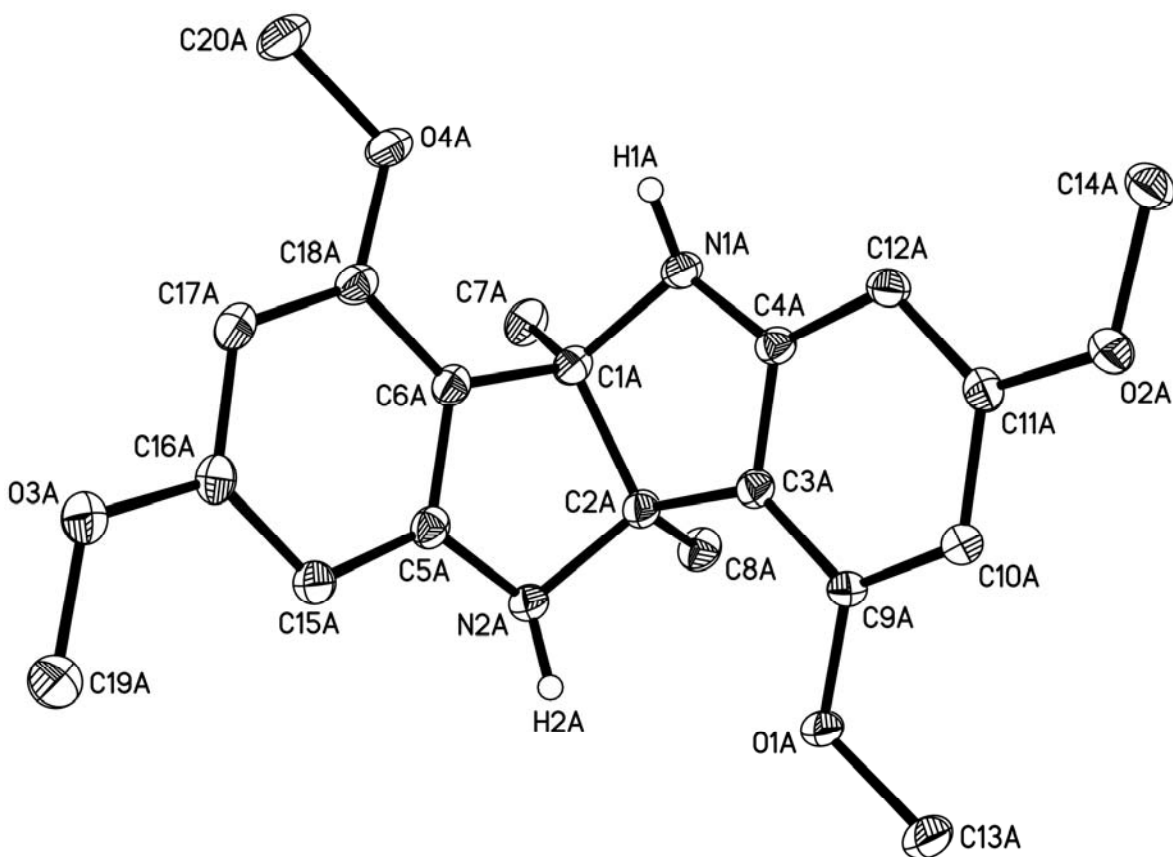

**Figure S49.** ORTEP diagram of **1(a)** [*P*-1] with thermal ellipsoids drawn at 50% probability level. Hydrogen atoms were omitted for clarity, except for H1A and H2A, to emphasize valency of the nitrogen atoms.

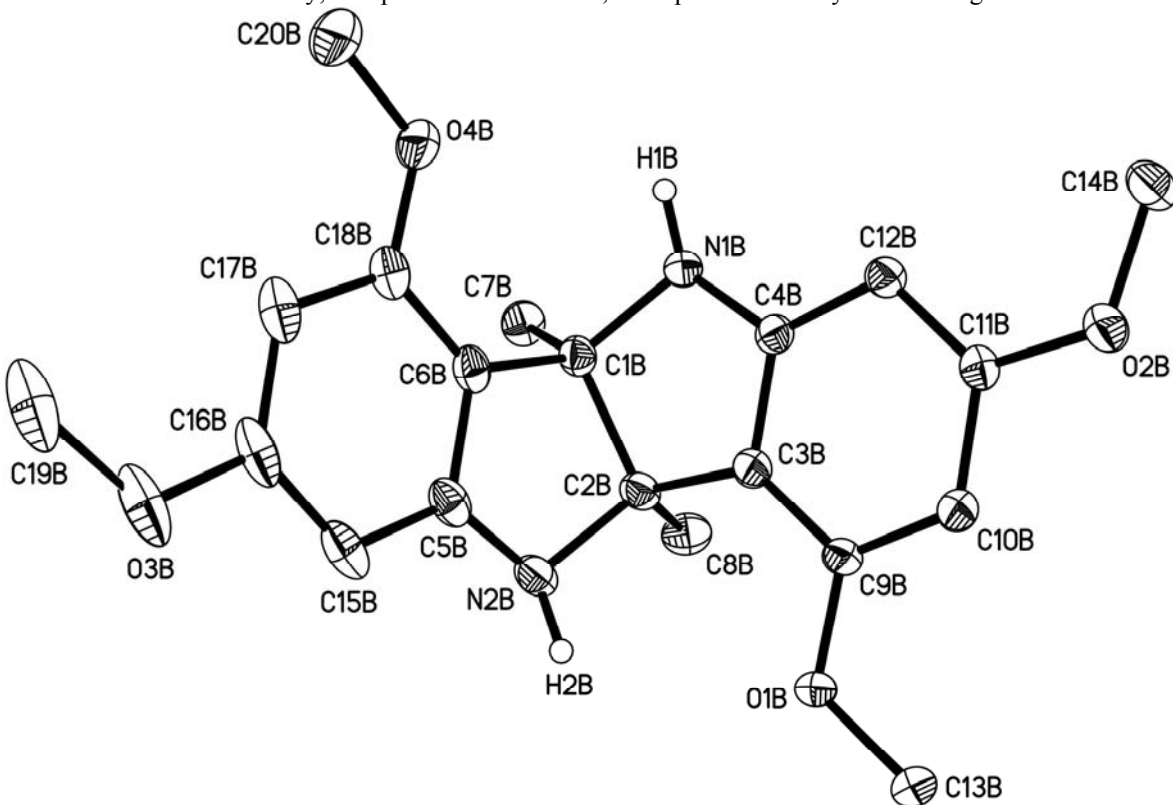

**Figure S50.** ORTEP diagram of **1(b)** [*P*-1] with thermal ellipsoids drawn at 50% probability level. Hydrogen atoms were omitted for clarity, except for H1B and H2B, to emphasize valency of the nitrogen atoms.

## Experimental Details for the Structure Determination of (+/-)-1 [P-1].

### Data collection

A crystal (0.48 x 0.28 x 0.14 mm<sup>3</sup>) was placed onto the tip of a 0.1 mm diameter glass capillary tube or fiber and mounted on a Bruker SMART APEX II CCD Platform diffractometer for a data collection at 100.0(1) K.<sup>1</sup> A preliminary set of cell constants and an orientation matrix were calculated from reflections harvested from three orthogonal wedges of reciprocal space. The full data collection was carried out using MoK $\alpha$  radiation (graphite monochromator) with a frame time of 10 seconds and a detector distance of 5.04 cm. A randomly oriented region of reciprocal space was surveyed: four major sections of frames were collected with 0.50° steps in  $\omega$  at four different  $\phi$  settings and a detector position of -33° in  $2\theta$ . The intensity data were corrected for absorption.<sup>2</sup> Final cell constants were calculated from the xyz centroids of 3974 strong reflections from the actual data collection after integration.<sup>3</sup> See Table S8 for additional crystal and refinement information.

### Structure solution and refinement

The structure was solved using SIR97<sup>4</sup> and refined using SHELXL-97.<sup>5</sup> The space group *P*-1 was determined based on the lack of systematic absences and intensity statistics. A direct-methods solution was calculated which provided most non-hydrogen atoms from the E-map. Full-matrix least squares / difference Fourier cycles were performed which located the remaining non-hydrogen atoms. All non-hydrogen atoms were refined with anisotropic displacement parameters. All hydrogen atoms were found from the difference Fourier map; their positions and isotropic displacement parameters were refined independently from those of all other atoms. The final full matrix least squares refinement converged to  $R1 = 0.0429$  ( $F^2$ ,  $I > 2\sigma(I)$ ) and  $wR2 = 0.1208$  ( $F^2$ , all data).

### Structure description

The structure is the one suggested. There are two independent molecules in the asymmetric unit with all atoms in general positions. Weak to moderate intermolecular and intramolecular hydrogen bonding is observed (see Table S14).

### References

- <sup>1</sup> APEX2 V2.1-0, Bruker Analytical X-ray Systems, Madison, WI (2006).
- <sup>2</sup> SADABS 2004/1, An empirical correction for absorption anisotropy, R. Blessing, *Acta Cryst.* **A51**, 33-38 (1995).
- <sup>3</sup> SAINT V7.34A, Bruker Analytical X-ray Systems, Madison, WI (2006).
- <sup>4</sup> SIR97, A new tool for crystal structure determination and refinement, A. Altomare, M. C. Burla, M. Camalli, G. L. Cascarano, C. Giacovazzo, A. Guagliardi, A. G. G. Moliterni, G. Polidori, R. Spagna. *J. Appl. Cryst.* **32**, 115-119 (1999).
- <sup>5</sup> SHELXTL V6.14, Bruker Analytical X-ray Systems, Madison, WI (2000).

#### Some equations of interest:

$$R_{\text{int}} = \frac{\sum |F_o^2 - \langle F_o^2 \rangle|}{\sum |F_o^2|}$$
$$R1 = \frac{\sum ||F_o| - |F_c||}{\sum |F_o|}$$
$$wR2 = \frac{[\sum [w(F_o^2 - F_c^2)^2]]}{\sum [w(F_o^2)^2]}^{1/2}$$

where  $w = 1 / [\sigma^2(F_o^2) + (aP)^2 + bP]$  and

$$P = 1/3 \max(0, F_o^2) + 2/3 F_c^2$$
$$\text{GooF} = S = \frac{[\sum [w(F_o^2 - F_c^2)^2]]}{(m-n)}^{1/2}$$

where  $m$  = number of reflections and  $n$  = number of parameters

**Table S8.** Crystal data and structure refinement for (+/-)-**1** [*P*-1].

|                                                     |                                                               |                       |
|-----------------------------------------------------|---------------------------------------------------------------|-----------------------|
| Identification code                                 | (±)- <b>1</b> , JONJK13                                       |                       |
| Empirical formula                                   | C <sub>20</sub> H <sub>24</sub> N <sub>2</sub> O <sub>4</sub> |                       |
| Formula weight                                      | 356.41                                                        |                       |
| Temperature                                         | 100.0(1) K                                                    |                       |
| Wavelength                                          | 0.71073 Å                                                     |                       |
| Crystal system                                      | Triclinic                                                     |                       |
| Space group                                         | <i>P</i> -1                                                   |                       |
| Unit cell dimensions                                | <i>a</i> = 10.5300(12) Å                                      | $\alpha$ = 99.573(2)° |
|                                                     | <i>b</i> = 12.5823(15) Å                                      | $\beta$ = 108.832(2)° |
|                                                     | <i>c</i> = 15.1214(18) Å                                      | $\gamma$ = 97.267(2)° |
| Volume                                              | 1834.6(4) Å <sup>3</sup>                                      |                       |
| <i>Z</i>                                            | 4                                                             |                       |
| Density (calculated)                                | 1.290 Mg/m <sup>3</sup>                                       |                       |
| Absorption coefficient                              | 0.090 mm <sup>-1</sup>                                        |                       |
| <i>F</i> (000)                                      | 760                                                           |                       |
| Crystal color, morphology                           | colorless, block                                              |                       |
| Crystal size                                        | 0.48 x 0.28 x 0.14 mm <sup>3</sup>                            |                       |
| Theta range for data collection                     | 1.67 to 31.51°                                                |                       |
| Index ranges                                        | -15 ≤ <i>h</i> ≤ 15, -18 ≤ <i>k</i> ≤ 18, -22 ≤ <i>l</i> ≤ 22 |                       |
| Reflections collected                               | 31906                                                         |                       |
| Independent reflections                             | 12131 [ <i>R</i> (int) = 0.0297]                              |                       |
| Observed reflections                                | 9371                                                          |                       |
| Completeness to theta = 31.51°                      | 99.1%                                                         |                       |
| Absorption correction                               | Multi-scan                                                    |                       |
| Max. and min. transmission                          | 0.9875 and 0.9579                                             |                       |
| Refinement method                                   | Full-matrix least-squares on <i>F</i> <sup>2</sup>            |                       |
| Data / restraints / parameters                      | 12131 / 0 / 661                                               |                       |
| Goodness-of-fit on <i>F</i> <sup>2</sup>            | 1.033                                                         |                       |
| Final <i>R</i> indices [ <i>I</i> > 2σ( <i>I</i> )] | <i>R</i> 1 = 0.0429, <i>wR</i> 2 = 0.1102                     |                       |
| <i>R</i> indices (all data)                         | <i>R</i> 1 = 0.0583, <i>wR</i> 2 = 0.1208                     |                       |
| Largest diff. peak and hole                         | 0.380 and -0.372 e.Å <sup>-3</sup>                            |                       |

**Table S9.** Atomic coordinates ( $\times 10^4$ ) and equivalent isotropic displacement parameters ( $\text{\AA}^2 \times 10^3$ ) for (+/-)-**1** [P-1].  $U_{\text{eq}}$  is defined as one third of the trace of the orthogonalized  $U_{ij}$  tensor.

|      | x       | y        | z       | $U_{\text{eq}}$ |
|------|---------|----------|---------|-----------------|
| O1A  | 7502(1) | 2801(1)  | 7928(1) | 21(1)           |
| O2A  | 7144(1) | -9(1)    | 5274(1) | 18(1)           |
| O3A  | 396(1)  | 2993(1)  | 6358(1) | 22(1)           |
| O4A  | 1315(1) | -578(1)  | 6694(1) | 21(1)           |
| N1A  | 4442(1) | -446(1)  | 7357(1) | 16(1)           |
| N2A  | 4812(1) | 2373(1)  | 8418(1) | 17(1)           |
| C1A  | 4113(1) | 407(1)   | 8011(1) | 16(1)           |
| C2A  | 5403(1) | 1368(1)  | 8367(1) | 15(1)           |
| C3A  | 5948(1) | 1136(1)  | 7555(1) | 14(1)           |
| C4A  | 5361(1) | 86(1)    | 6998(1) | 14(1)           |
| C5A  | 3470(1) | 2109(1)  | 7762(1) | 16(1)           |
| C6A  | 3006(1) | 982(1)   | 7510(1) | 15(1)           |
| C7A  | 3778(1) | -77(1)   | 8787(1) | 21(1)           |
| C8A  | 6479(1) | 1365(1)  | 9324(1) | 20(1)           |
| C9A  | 6940(1) | 1776(1)  | 7338(1) | 15(1)           |
| C10A | 7302(1) | 1372(1)  | 6558(1) | 16(1)           |
| C11A | 6699(1) | 300(1)   | 6016(1) | 15(1)           |
| C12A | 5730(1) | -370(1)  | 6229(1) | 15(1)           |
| C13A | 8602(1) | 3413(1)  | 7749(1) | 33(1)           |
| C14A | 6669(1) | -1131(1) | 4762(1) | 19(1)           |
| C15A | 2643(1) | 2838(1)  | 7407(1) | 18(1)           |
| C16A | 1314(1) | 2376(1)  | 6782(1) | 18(1)           |
| C17A | 801(1)  | 1239(1)  | 6526(1) | 18(1)           |
| C18A | 1664(1) | 544(1)   | 6901(1) | 16(1)           |
| C19A | 857(1)  | 4154(1)  | 6609(1) | 27(1)           |
| C20A | -92(1)  | -1060(1) | 6178(1) | 26(1)           |
| O1B  | 670(1)  | 4071(1)  | 835(1)  | 22(1)           |
| O2B  | -322(1) | 475(1)   | 1351(1) | 25(1)           |
| O3B  | 6091(1) | 6523(1)  | 5148(1) | 38(1)           |
| O4B  | 6713(1) | 3025(1)  | 3578(1) | 28(1)           |
| N1B  | 4270(1) | 2214(1)  | 1603(1) | 19(1)           |
| N2B  | 3883(1) | 5002(1)  | 1752(1) | 22(1)           |
| C1B  | 4863(1) | 3373(1)  | 1720(1) | 18(1)           |



|      |         |         |         |       |
|------|---------|---------|---------|-------|
| C2B  | 3592(1) | 3863(1) | 1182(1) | 19(1) |
| C3B  | 2439(1) | 3078(1) | 1269(1) | 17(1) |
| C4B  | 2896(1) | 2133(1) | 1497(1) | 17(1) |
| C5B  | 4695(1) | 5014(1) | 2694(1) | 21(1) |
| C6B  | 5288(1) | 4081(1) | 2725(1) | 20(1) |
| C7B  | 6038(1) | 3473(1) | 1338(1) | 24(1) |
| C8B  | 3376(1) | 3858(1) | 133(1)  | 25(1) |
| C9B  | 1063(1) | 3123(1) | 1078(1) | 18(1) |
| C10B | 168(1)  | 2243(1) | 1130(1) | 20(1) |
| C11B | 660(1)  | 1298(1) | 1351(1) | 19(1) |
| C12B | 2028(1) | 1225(1) | 1547(1) | 18(1) |
| C13B | -748(1) | 4108(1) | 577(1)  | 29(1) |
| C14B | 11(1)   | -589(1) | 1360(1) | 26(1) |
| C15B | 4967(1) | 5836(1) | 3506(1) | 26(1) |
| C16B | 5861(1) | 5695(1) | 4367(1) | 28(1) |
| C17B | 6469(1) | 4773(1) | 4430(1) | 27(1) |
| C18B | 6173(1) | 3962(1) | 3593(1) | 23(1) |
| C19B | 7087(2) | 6487(1) | 6034(1) | 43(1) |
| C20B | 7587(2) | 2868(1) | 4467(1) | 46(1) |

---

**Table S10.** Bond lengths [Å] and angles [°] for (+/-)-**1** [*P*-1].

|               |            |               |            |
|---------------|------------|---------------|------------|
| O(1A)-C(9A)   | 1.3759(12) | C(12A)-H(12A) | 0.976(13)  |
| O(1A)-C(13A)  | 1.4327(14) | C(13A)-H(13A) | 0.972(17)  |
| O(2A)-C(11A)  | 1.3671(12) | C(13A)-H(13B) | 0.969(17)  |
| O(2A)-C(14A)  | 1.4322(12) | C(13A)-H(13C) | 1.042(17)  |
| O(3A)-C(16A)  | 1.3793(12) | C(14A)-H(14A) | 0.981(14)  |
| O(3A)-C(19A)  | 1.4251(14) | C(14A)-H(14B) | 0.994(15)  |
| O(4A)-C(18A)  | 1.3699(12) | C(14A)-H(14C) | 0.982(14)  |
| O(4A)-C(20A)  | 1.4287(13) | C(15A)-C(16A) | 1.3955(14) |
| N(1A)-C(4A)   | 1.4058(12) | C(15A)-H(15A) | 0.969(14)  |
| N(1A)-C(1A)   | 1.4873(13) | C(16A)-C(17A) | 1.4044(15) |
| N(1A)-H(1A)   | 0.895(14)  | C(17A)-C(18A) | 1.3948(14) |
| N(2A)-C(5A)   | 1.3984(13) | C(17A)-H(17A) | 0.953(15)  |
| N(2A)-C(2A)   | 1.4806(13) | C(19A)-H(19A) | 0.973(15)  |
| N(2A)-H(2A)   | 0.896(15)  | C(19A)-H(19B) | 0.992(15)  |
| C(1A)-C(6A)   | 1.5104(14) | C(19A)-H(19C) | 0.983(16)  |
| C(1A)-C(7A)   | 1.5239(14) | C(20A)-H(20A) | 1.001(17)  |
| C(1A)-C(2A)   | 1.5790(14) | C(20A)-H(20B) | 0.958(17)  |
| C(2A)-C(3A)   | 1.5159(13) | C(20A)-H(20C) | 0.989(16)  |
| C(2A)-C(8A)   | 1.5231(14) | O(1B)-C(9B)   | 1.3785(12) |
| C(3A)-C(4A)   | 1.3877(13) | O(1B)-C(13B)  | 1.4255(14) |
| C(3A)-C(9A)   | 1.3946(13) | O(2B)-C(11B)  | 1.3673(13) |
| C(4A)-C(12A)  | 1.3992(14) | O(2B)-C(14B)  | 1.4274(14) |
| C(5A)-C(6A)   | 1.3865(14) | O(3B)-C(16B)  | 1.3715(14) |
| C(5A)-C(15A)  | 1.3976(14) | O(3B)-C(19B)  | 1.422(2)   |
| C(6A)-C(18A)  | 1.3933(13) | O(4B)-C(18B)  | 1.3726(14) |
| C(7A)-H(7A)   | 0.998(14)  | O(4B)-C(20B)  | 1.4234(16) |
| C(7A)-H(7B)   | 0.990(15)  | N(1B)-C(4B)   | 1.3918(13) |
| C(7A)-H(7C)   | 0.969(16)  | N(1B)-C(1B)   | 1.4696(13) |
| C(8A)-H(8A)   | 0.961(16)  | N(1B)-H(1B)   | 0.870(17)  |
| C(8A)-H(8B)   | 0.990(15)  | N(2B)-C(5B)   | 1.4020(15) |
| C(8A)-H(8C)   | 1.002(15)  | N(2B)-C(2B)   | 1.4825(14) |
| C(9A)-C(10A)  | 1.3905(14) | N(2B)-H(2B)   | 0.882(17)  |
| C(10A)-C(11A) | 1.4052(14) | C(1B)-C(6B)   | 1.5207(15) |
| C(10A)-H(10A) | 0.959(15)  | C(1B)-C(7B)   | 1.5253(15) |
| C(11A)-C(12A) | 1.3936(14) | C(1B)-C(2B)   | 1.5828(15) |

|                    |            |                     |           |
|--------------------|------------|---------------------|-----------|
| C(2B)-C(3B)        | 1.5207(14) | C(11A)-O(2A)-C(14A) | 116.25(8) |
| C(2B)-C(8B)        | 1.5266(16) | C(16A)-O(3A)-C(19A) | 116.53(9) |
| C(3B)-C(4B)        | 1.3924(14) | C(18A)-O(4A)-C(20A) | 117.22(9) |
| C(3B)-C(9B)        | 1.3932(14) | C(4A)-N(1A)-C(1A)   | 107.82(8) |
| C(4B)-C(12B)       | 1.3989(14) | C(4A)-N(1A)-H(1A)   | 115.0(9)  |
| C(5B)-C(15B)       | 1.3910(15) | C(1A)-N(1A)-H(1A)   | 114.1(9)  |
| C(5B)-C(6B)        | 1.3978(15) | C(5A)-N(2A)-C(2A)   | 107.77(8) |
| C(6B)-C(18B)       | 1.3878(16) | C(5A)-N(2A)-H(2A)   | 115.4(9)  |
| C(7B)-H(7D)        | 1.003(15)  | C(2A)-N(2A)-H(2A)   | 117.9(9)  |
| C(7B)-H(7E)        | 0.983(15)  | N(1A)-C(1A)-C(6A)   | 114.28(8) |
| C(7B)-H(7F)        | 1.001(15)  | N(1A)-C(1A)-C(7A)   | 110.30(8) |
| C(8B)-H(8D)        | 1.007(16)  | C(6A)-C(1A)-C(7A)   | 111.38(8) |
| C(8B)-H(8E)        | 0.979(17)  | N(1A)-C(1A)-C(2A)   | 103.76(7) |
| C(8B)-H(8F)        | 0.988(17)  | C(6A)-C(1A)-C(2A)   | 100.63(8) |
| C(9B)-C(10B)       | 1.3906(15) | C(7A)-C(1A)-C(2A)   | 116.12(8) |
| C(10B)-C(11B)      | 1.4037(15) | N(2A)-C(2A)-C(3A)   | 114.53(8) |
| C(10B)-H(10B)      | 0.981(15)  | N(2A)-C(2A)-C(8A)   | 111.37(8) |
| C(11B)-C(12B)      | 1.3926(15) | C(3A)-C(2A)-C(8A)   | 111.13(8) |
| C(12B)-H(12B)      | 0.958(14)  | N(2A)-C(2A)-C(1A)   | 103.59(7) |
| C(13B)-H(13D)      | 0.968(17)  | C(3A)-C(2A)-C(1A)   | 100.61(7) |
| C(13B)-H(13E)      | 0.965(16)  | C(8A)-C(2A)-C(1A)   | 115.09(8) |
| C(13B)-H(13F)      | 0.992(16)  | C(4A)-C(3A)-C(9A)   | 118.87(9) |
| C(14B)-H(14D)      | 0.967(16)  | C(4A)-C(3A)-C(2A)   | 110.57(8) |
| C(14B)-H(14E)      | 0.977(17)  | C(9A)-C(3A)-C(2A)   | 130.48(9) |
| C(14B)-H(14F)      | 0.993(16)  | C(3A)-C(4A)-C(12A)  | 122.98(9) |
| C(15B)-C(16B)      | 1.3931(19) | C(3A)-C(4A)-N(1A)   | 110.42(8) |
| C(15B)-H(15B)      | 0.953(16)  | C(12A)-C(4A)-N(1A)  | 126.48(9) |
| C(16B)-C(17B)      | 1.3966(19) | C(6A)-C(5A)-C(15A)  | 122.13(9) |
| C(17B)-C(18B)      | 1.4047(16) | C(6A)-C(5A)-N(2A)   | 110.55(9) |
| C(17B)-H(17B)      | 0.967(16)  | C(15A)-C(5A)-N(2A)  | 127.28(9) |
| C(19B)-H(19D)      | 0.958(18)  | C(5A)-C(6A)-C(18A)  | 119.91(9) |
| C(19B)-H(19E)      | 0.981(17)  | C(5A)-C(6A)-C(1A)   | 110.34(8) |
| C(19B)-H(19F)      | 1.005(19)  | C(18A)-C(6A)-C(1A)  | 129.71(9) |
| C(20B)-H(20D)      | 0.944(19)  | C(1A)-C(7A)-H(7A)   | 109.6(8)  |
| C(20B)-H(20E)      | 0.948(19)  | C(1A)-C(7A)-H(7B)   | 110.4(8)  |
| C(20B)-H(20F)      | 1.02(2)    | H(7A)-C(7A)-H(7B)   | 109.4(11) |
| C(9A)-O(1A)-C(13A) | 115.62(8)  | C(1A)-C(7A)-H(7C)   | 109.7(9)  |

|                      |           |                      |            |
|----------------------|-----------|----------------------|------------|
| H(7A)-C(7A)-H(7C)    | 108.6(12) | C(15A)-C(16A)-C(17A) | 122.71(9)  |
| H(7B)-C(7A)-H(7C)    | 109.3(12) | C(18A)-C(17A)-C(16A) | 118.52(9)  |
| C(2A)-C(8A)-H(8A)    | 108.9(9)  | C(18A)-C(17A)-H(17A) | 122.3(9)   |
| C(2A)-C(8A)-H(8B)    | 111.7(9)  | C(16A)-C(17A)-H(17A) | 119.2(9)   |
| H(8A)-C(8A)-H(8B)    | 110.0(13) | O(4A)-C(18A)-C(6A)   | 115.09(9)  |
| C(2A)-C(8A)-H(8C)    | 111.0(9)  | O(4A)-C(18A)-C(17A)  | 124.85(9)  |
| H(8A)-C(8A)-H(8C)    | 109.2(13) | C(6A)-C(18A)-C(17A)  | 120.02(9)  |
| H(8B)-C(8A)-H(8C)    | 105.9(12) | O(3A)-C(19A)-H(19A)  | 104.2(9)   |
| O(1A)-C(9A)-C(10A)   | 123.69(9) | O(3A)-C(19A)-H(19B)  | 112.0(8)   |
| O(1A)-C(9A)-C(3A)    | 116.13(9) | H(19A)-C(19A)-H(19B) | 111.5(12)  |
| C(10A)-C(9A)-C(3A)   | 120.17(9) | O(3A)-C(19A)-H(19C)  | 111.4(9)   |
| C(9A)-C(10A)-C(11A)  | 119.40(9) | H(19A)-C(19A)-H(19C) | 109.2(13)  |
| C(9A)-C(10A)-H(10A)  | 123.1(9)  | H(19B)-C(19A)-H(19C) | 108.6(13)  |
| C(11A)-C(10A)-H(10A) | 117.5(9)  | O(4A)-C(20A)-H(20A)  | 106.1(9)   |
| O(2A)-C(11A)-C(12A)  | 124.03(9) | O(4A)-C(20A)-H(20B)  | 111.8(10)  |
| O(2A)-C(11A)-C(10A)  | 114.14(8) | H(20A)-C(20A)-H(20B) | 112.0(14)  |
| C(12A)-C(11A)-C(10A) | 121.83(9) | O(4A)-C(20A)-H(20C)  | 110.7(9)   |
| C(11A)-C(12A)-C(4A)  | 116.68(9) | H(20A)-C(20A)-H(20C) | 110.0(13)  |
| C(11A)-C(12A)-H(12A) | 122.9(8)  | H(20B)-C(20A)-H(20C) | 106.3(13)  |
| C(4A)-C(12A)-H(12A)  | 120.4(8)  | C(9B)-O(1B)-C(13B)   | 117.11(9)  |
| O(1A)-C(13A)-H(13A)  | 104.0(10) | C(11B)-O(2B)-C(14B)  | 117.55(9)  |
| O(1A)-C(13A)-H(13B)  | 109.3(10) | C(16B)-O(3B)-C(19B)  | 118.26(12) |
| H(13A)-C(13A)-H(13B) | 111.3(14) | C(18B)-O(4B)-C(20B)  | 117.42(10) |
| O(1A)-C(13A)-H(13C)  | 109.8(9)  | C(4B)-N(1B)-C(1B)    | 108.49(8)  |
| H(13A)-C(13A)-H(13C) | 107.6(13) | C(4B)-N(1B)-H(1B)    | 116.7(11)  |
| H(13B)-C(13A)-H(13C) | 114.3(14) | C(1B)-N(1B)-H(1B)    | 117.5(11)  |
| O(2A)-C(14A)-H(14A)  | 105.8(8)  | C(5B)-N(2B)-C(2B)    | 107.77(9)  |
| O(2A)-C(14A)-H(14B)  | 108.9(8)  | C(5B)-N(2B)-H(2B)    | 115.4(11)  |
| H(14A)-C(14A)-H(14B) | 110.2(11) | C(2B)-N(2B)-H(2B)    | 114.8(11)  |
| O(2A)-C(14A)-H(14C)  | 113.2(8)  | N(1B)-C(1B)-C(6B)    | 115.65(9)  |
| H(14A)-C(14A)-H(14C) | 109.4(11) | N(1B)-C(1B)-C(7B)    | 110.81(9)  |
| H(14B)-C(14A)-H(14C) | 109.3(12) | C(6B)-C(1B)-C(7B)    | 110.93(9)  |
| C(16A)-C(15A)-C(5A)  | 116.68(9) | N(1B)-C(1B)-C(2B)    | 103.37(8)  |
| C(16A)-C(15A)-H(15A) | 122.3(8)  | C(6B)-C(1B)-C(2B)    | 100.35(8)  |
| C(5A)-C(15A)-H(15A)  | 121.0(8)  | C(7B)-C(1B)-C(2B)    | 115.30(9)  |
| O(3A)-C(16A)-C(15A)  | 123.01(9) | N(2B)-C(2B)-C(3B)    | 115.77(8)  |
| O(3A)-C(16A)-C(17A)  | 114.29(9) | N(2B)-C(2B)-C(8B)    | 110.85(9)  |

|                      |            |                      |            |
|----------------------|------------|----------------------|------------|
| C(3B)-C(2B)-C(8B)    | 110.90(9)  | C(11B)-C(12B)-C(4B)  | 116.88(9)  |
| N(2B)-C(2B)-C(1B)    | 103.55(8)  | C(11B)-C(12B)-H(12B) | 121.9(8)   |
| C(3B)-C(2B)-C(1B)    | 100.21(8)  | C(4B)-C(12B)-H(12B)  | 121.2(8)   |
| C(8B)-C(2B)-C(1B)    | 115.12(9)  | O(1B)-C(13B)-H(13D)  | 104.9(10)  |
| C(4B)-C(3B)-C(9B)    | 118.98(9)  | O(1B)-C(13B)-H(13E)  | 113.1(9)   |
| C(4B)-C(3B)-C(2B)    | 109.59(9)  | H(13D)-C(13B)-H(13E) | 111.4(13)  |
| C(9B)-C(3B)-C(2B)    | 131.12(9)  | O(1B)-C(13B)-H(13F)  | 109.3(9)   |
| N(1B)-C(4B)-C(3B)    | 110.60(9)  | H(13D)-C(13B)-H(13F) | 109.3(13)  |
| N(1B)-C(4B)-C(12B)   | 126.75(9)  | H(13E)-C(13B)-H(13F) | 108.8(13)  |
| C(3B)-C(4B)-C(12B)   | 122.55(9)  | O(2B)-C(14B)-H(14D)  | 105.0(9)   |
| C(15B)-C(5B)-C(6B)   | 122.23(11) | O(2B)-C(14B)-H(14E)  | 110.7(9)   |
| C(15B)-C(5B)-N(2B)   | 127.16(11) | H(14D)-C(14B)-H(14E) | 110.8(13)  |
| C(6B)-C(5B)-N(2B)    | 110.54(9)  | O(2B)-C(14B)-H(14F)  | 110.9(9)   |
| C(18B)-C(6B)-C(5B)   | 119.25(10) | H(14D)-C(14B)-H(14F) | 112.1(13)  |
| C(18B)-C(6B)-C(1B)   | 130.82(10) | H(14E)-C(14B)-H(14F) | 107.4(13)  |
| C(5B)-C(6B)-C(1B)    | 109.84(9)  | C(5B)-C(15B)-C(16B)  | 117.25(11) |
| C(1B)-C(7B)-H(7D)    | 108.8(9)   | C(5B)-C(15B)-H(15B)  | 123.9(10)  |
| C(1B)-C(7B)-H(7E)    | 111.6(8)   | C(16B)-C(15B)-H(15B) | 118.8(9)   |
| H(7D)-C(7B)-H(7E)    | 108.1(12)  | O(3B)-C(16B)-C(15B)  | 115.11(12) |
| C(1B)-C(7B)-H(7F)    | 109.7(9)   | O(3B)-C(16B)-C(17B)  | 122.58(12) |
| H(7D)-C(7B)-H(7F)    | 108.7(12)  | C(15B)-C(16B)-C(17B) | 122.30(11) |
| H(7E)-C(7B)-H(7F)    | 109.9(12)  | C(16B)-C(17B)-C(18B) | 118.79(11) |
| C(2B)-C(8B)-H(8D)    | 109.4(9)   | C(16B)-C(17B)-H(17B) | 121.0(10)  |
| C(2B)-C(8B)-H(8E)    | 110.6(9)   | C(18B)-C(17B)-H(17B) | 120.2(10)  |
| H(8D)-C(8B)-H(8E)    | 110.3(13)  | O(4B)-C(18B)-C(6B)   | 116.48(10) |
| C(2B)-C(8B)-H(8F)    | 111.2(9)   | O(4B)-C(18B)-C(17B)  | 123.35(11) |
| H(8D)-C(8B)-H(8F)    | 108.2(13)  | C(6B)-C(18B)-C(17B)  | 120.17(11) |
| H(8E)-C(8B)-H(8F)    | 107.1(13)  | O(3B)-C(19B)-H(19D)  | 104.9(11)  |
| O(1B)-C(9B)-C(10B)   | 123.54(9)  | O(3B)-C(19B)-H(19E)  | 111.7(10)  |
| O(1B)-C(9B)-C(3B)    | 116.10(9)  | H(19D)-C(19B)-H(19E) | 110.0(14)  |
| C(10B)-C(9B)-C(3B)   | 120.36(9)  | O(3B)-C(19B)-H(19F)  | 112.1(10)  |
| C(9B)-C(10B)-C(11B)  | 119.14(10) | H(19D)-C(19B)-H(19F) | 110.8(15)  |
| C(9B)-C(10B)-H(10B)  | 122.7(9)   | H(19E)-C(19B)-H(19F) | 107.5(14)  |
| C(11B)-C(10B)-H(10B) | 118.1(9)   | O(4B)-C(20B)-H(20D)  | 107.6(11)  |
| O(2B)-C(11B)-C(12B)  | 124.07(9)  | O(4B)-C(20B)-H(20E)  | 111.2(11)  |
| O(2B)-C(11B)-C(10B)  | 113.87(9)  | H(20D)-C(20B)-H(20E) | 112.9(16)  |
| C(12B)-C(11B)-C(10B) | 122.06(10) | O(4B)-C(20B)-H(20F)  | 108.5(11)  |

H(20D)-C(20B)-H(20F) 106.3(15) H(20E)-C(20B)-H(20F) 110.1(15)

**Table S11.** Anisotropic displacement parameters ( $\text{\AA}^2 \times 10^3$ ) for (+/-)-**1** [*P*-1]. The anisotropic displacement factor exponent takes the form:  $-2\pi^2 [ h^2 a^{*2} U_{11} + \dots + 2 h k a^* b^* U_{12} ]$

|      | U <sub>11</sub> | U <sub>22</sub> | U <sub>33</sub> | U <sub>23</sub> | U <sub>13</sub> | U <sub>12</sub> |
|------|-----------------|-----------------|-----------------|-----------------|-----------------|-----------------|
| O1A  | 18(1)           | 15(1)           | 27(1)           | -5(1)           | 11(1)           | -3(1)           |
| O2A  | 20(1)           | 16(1)           | 17(1)           | 0(1)            | 9(1)            | 3(1)            |
| O3A  | 18(1)           | 21(1)           | 27(1)           | 6(1)            | 6(1)            | 6(1)            |
| O4A  | 15(1)           | 17(1)           | 26(1)           | 3(1)            | 3(1)            | -1(1)           |
| N1A  | 14(1)           | 15(1)           | 17(1)           | 2(1)            | 5(1)            | 0(1)            |
| N2A  | 14(1)           | 15(1)           | 18(1)           | 0(1)            | 4(1)            | 1(1)            |
| C1A  | 14(1)           | 17(1)           | 15(1)           | 3(1)            | 5(1)            | 1(1)            |
| C2A  | 13(1)           | 16(1)           | 15(1)           | 0(1)            | 4(1)            | 2(1)            |
| C3A  | 13(1)           | 15(1)           | 14(1)           | 2(1)            | 4(1)            | 2(1)            |
| C4A  | 13(1)           | 14(1)           | 15(1)           | 4(1)            | 3(1)            | 2(1)            |
| C5A  | 14(1)           | 19(1)           | 15(1)           | 1(1)            | 6(1)            | 2(1)            |
| C6A  | 13(1)           | 18(1)           | 15(1)           | 3(1)            | 6(1)            | 2(1)            |
| C7A  | 19(1)           | 26(1)           | 19(1)           | 8(1)            | 8(1)            | 2(1)            |
| C8A  | 17(1)           | 24(1)           | 15(1)           | 2(1)            | 3(1)            | 2(1)            |
| C9A  | 13(1)           | 12(1)           | 18(1)           | 0(1)            | 5(1)            | 1(1)            |
| C10A | 15(1)           | 14(1)           | 19(1)           | 2(1)            | 7(1)            | 2(1)            |

|      |       |       |       |        |        |        |
|------|-------|-------|-------|--------|--------|--------|
| C11A | 15(1) | 16(1) | 14(1) | 3(1)   | 5(1)   | 5(1)   |
| C12A | 15(1) | 13(1) | 16(1) | 1(1)   | 4(1)   | 2(1)   |
| C13A | 27(1) | 20(1) | 48(1) | -10(1) | 23(1)  | -8(1)  |
| C14A | 20(1) | 17(1) | 17(1) | -1(1)  | 6(1)   | 4(1)   |
| C15A | 17(1) | 17(1) | 20(1) | 2(1)   | 8(1)   | 2(1)   |
| C16A | 16(1) | 21(1) | 18(1) | 5(1)   | 8(1)   | 5(1)   |
| C17A | 13(1) | 22(1) | 18(1) | 3(1)   | 5(1)   | 2(1)   |
| C18A | 15(1) | 17(1) | 16(1) | 3(1)   | 6(1)   | 0(1)   |
| C19A | 23(1) | 21(1) | 37(1) | 10(1)  | 8(1)   | 5(1)   |
| C20A | 16(1) | 23(1) | 30(1) | 3(1)   | 2(1)   | -4(1)  |
| O1B  | 17(1) | 15(1) | 32(1) | 5(1)   | 6(1)   | 6(1)   |
| O2B  | 21(1) | 18(1) | 36(1) | 8(1)   | 10(1)  | 2(1)   |
| O3B  | 56(1) | 23(1) | 30(1) | -8(1)  | 23(1)  | -11(1) |
| O4B  | 27(1) | 27(1) | 23(1) | 0(1)   | 0(1)   | 5(1)   |
| N1B  | 16(1) | 16(1) | 22(1) | 3(1)   | 5(1)   | 5(1)   |
| N2B  | 22(1) | 15(1) | 30(1) | 3(1)   | 12(1)  | 4(1)   |
| C1B  | 17(1) | 17(1) | 20(1) | 1(1)   | 7(1)   | 3(1)   |
| C2B  | 20(1) | 16(1) | 23(1) | 3(1)   | 9(1)   | 4(1)   |
| C3B  | 18(1) | 16(1) | 18(1) | 2(1)   | 6(1)   | 4(1)   |
| C4B  | 17(1) | 17(1) | 15(1) | 1(1)   | 4(1)   | 4(1)   |
| C5B  | 21(1) | 16(1) | 28(1) | 2(1)   | 14(1)  | -1(1)  |
| C6B  | 18(1) | 18(1) | 22(1) | 0(1)   | 9(1)   | -1(1)  |
| C7B  | 20(1) | 25(1) | 27(1) | 3(1)   | 12(1)  | 5(1)   |
| C8B  | 27(1) | 28(1) | 25(1) | 10(1)  | 12(1)  | 10(1)  |
| C9B  | 18(1) | 14(1) | 19(1) | 2(1)   | 5(1)   | 4(1)   |
| C10B | 16(1) | 18(1) | 22(1) | 3(1)   | 5(1)   | 3(1)   |
| C11B | 19(1) | 17(1) | 18(1) | 2(1)   | 6(1)   | 1(1)   |
| C12B | 20(1) | 16(1) | 18(1) | 3(1)   | 5(1)   | 4(1)   |
| C13B | 18(1) | 21(1) | 43(1) | 7(1)   | 4(1)   | 6(1)   |
| C14B | 29(1) | 18(1) | 32(1) | 7(1)   | 12(1)  | 2(1)   |
| C15B | 32(1) | 16(1) | 32(1) | -2(1)  | 19(1)  | -3(1)  |
| C16B | 36(1) | 19(1) | 27(1) | -5(1)  | 19(1)  | -10(1) |
| C17B | 30(1) | 24(1) | 21(1) | -1(1)  | 10(1)  | -8(1)  |
| C18B | 22(1) | 20(1) | 23(1) | 0(1)   | 8(1)   | -2(1)  |
| C19B | 62(1) | 30(1) | 27(1) | -6(1)  | 22(1)  | -20(1) |
| C20B | 53(1) | 35(1) | 28(1) | 0(1)   | -12(1) | 9(1)   |

---

**Table S12.** Hydrogen coordinates ( $\times 10^4$ ) and isotropic displacement parameters ( $\text{\AA}^2 \times 10^3$ ) for (+/-)-**1** [*P*-1].

|      | x        | y         | z        | $U_{\text{(eq)}}$ |
|------|----------|-----------|----------|-------------------|
| H1A  | 3708(15) | -899(12)  | 6912(10) | 22(3)             |
| H2A  | 5312(15) | 2999(12)  | 8407(10) | 25(3)             |
| H7A  | 2899(14) | -621(12)  | 8494(10) | 23(3)             |
| H7B  | 4516(15) | -444(12)  | 9113(10) | 25(4)             |
| H7C  | 3676(15) | 503(13)   | 9254(11) | 29(4)             |
| H8A  | 7256(16) | 1935(13)  | 9450(11) | 33(4)             |
| H8B  | 6117(15) | 1477(12)  | 9853(11) | 28(4)             |
| H8C  | 6779(15) | 640(13)   | 9314(11) | 30(4)             |
| H10A | 7957(15) | 1791(12)  | 6369(11) | 29(4)             |
| H12A | 5300(13) | -1116(11) | 5859(9)  | 16(3)             |
| H13A | 8864(17) | 4099(14)  | 8225(12) | 41(4)             |
| H13B | 9346(17) | 3013(13)  | 7838(12) | 38(4)             |
| H13C | 8240(17) | 3597(13)  | 7076(13) | 40(4)             |
| H14A | 7113(13) | -1223(11) | 4282(10) | 18(3)             |
| H14B | 6960(15) | -1616(12) | 5216(11) | 26(4)             |
| H14C | 5672(15) | -1323(11) | 4439(10) | 23(3)             |
| H15A | 2990(14) | 3623(12)  | 7582(10) | 23(3)             |
| H17A | -115(15) | 967(12)   | 6094(11) | 27(4)             |
| H19A | 75(16)   | 4437(12)  | 6254(11) | 29(4)             |
| H19B | 1143(15) | 4450(12)  | 7308(11) | 27(4)             |
| H19C | 1628(16) | 4367(13)  | 6401(12) | 34(4)             |
| H20A | -162(17) | -1871(14) | 6122(12) | 38(4)             |
| H20B | -675(16) | -773(13)  | 6490(12) | 35(4)             |
| H20C | -390(15) | -896(12)  | 5533(12) | 30(4)             |
| H1B  | 4739(18) | 1847(14)  | 1987(13) | 41(4)             |
| H2B  | 3158(17) | 5307(13)  | 1691(12) | 34(4)             |
| H7D  | 6788(15) | 3147(12)  | 1731(11) | 29(4)             |
| H7E  | 5749(15) | 3075(12)  | 667(11)  | 26(4)             |
| H7F  | 6402(15) | 4265(13)  | 1398(11) | 30(4)             |
| H8D  | 2502(16) | 4119(13)  | -164(11) | 34(4)             |
| H8E  | 4150(17) | 4328(13)  | 78(11)   | 36(4)             |
| H8F  | 3302(16) | 3111(14)  | -233(12) | 36(4)             |
| H10B | -807(16) | 2245(12)  | 1001(11) | 30(4)             |



|      |           |           |          |       |
|------|-----------|-----------|----------|-------|
| H12B | 2364(14)  | 582(11)   | 1704(10) | 22(3) |
| H13D | -814(17)  | 4836(14)  | 459(12)  | 38(4) |
| H13E | -1317(16) | 3545(13)  | 24(11)   | 31(4) |
| H13F | -1045(16) | 4023(12)  | 1126(11) | 31(4) |
| H14D | -831(17)  | -1063(13) | 1289(11) | 34(4) |
| H14E | 323(16)   | -831(13)  | 831(12)  | 38(4) |
| H14F | 760(16)   | -582(12)  | 1964(11) | 31(4) |
| H15B | 4601(16)  | 6490(13)  | 3501(11) | 32(4) |
| H17B | 7077(16)  | 4686(13)  | 5036(12) | 34(4) |
| H19D | 7118(18)  | 7146(15)  | 6467(13) | 43(5) |
| H19E | 6827(17)  | 5843(14)  | 6270(12) | 41(4) |
| H19F | 8010(19)  | 6459(14)  | 5980(13) | 46(5) |
| H20D | 7793(19)  | 2160(16)  | 4355(13) | 50(5) |
| H20E | 8379(19)  | 3432(16)  | 4738(14) | 49(5) |
| H20F | 7051(19)  | 2861(15)  | 4924(14) | 50(5) |

---

**Table S13.** Torsion angles [°] for (+/-)-**1** [*P*-1].

|                   |            |                     |            |
|-------------------|------------|---------------------|------------|
| C4A-N1A-C1A-C6A   | 82.89(10)  | C2A-C1A-C6A-C5A     | -14.72(10) |
| C4A-N1A-C1A-C7A   | -150.72(8) | N1A-C1A-C6A-C18A    | 57.35(13)  |
| C4A-N1A-C1A-C2A   | -25.70(10) | C7A-C1A-C6A-C18A    | -68.47(13) |
| C5A-N2A-C2A-C3A   | 82.10(10)  | C2A-C1A-C6A-C18A    | 167.85(10) |
| C5A-N2A-C2A-C8A   | -150.73(8) | C13A-O1A-C9A-C10A   | -5.70(15)  |
| C5A-N2A-C2A-C1A   | -26.46(10) | C13A-O1A-C9A-C3A    | 174.89(10) |
| N1A-C1A-C2A-N2A   | 142.59(8)  | C4A-C3A-C9A-O1A     | -178.75(9) |
| C6A-C1A-C2A-N2A   | 24.12(9)   | C2A-C3A-C9A-O1A     | -2.36(15)  |
| C7A-C1A-C2A-N2A   | -96.22(10) | C4A-C3A-C9A-C10A    | 1.82(14)   |
| N1A-C1A-C2A-C3A   | 23.92(9)   | C2A-C3A-C9A-C10A    | 178.21(9)  |
| C6A-C1A-C2A-C3A   | -94.56(8)  | O1A-C9A-C10A-C11A   | 178.09(9)  |
| C7A-C1A-C2A-C3A   | 145.10(9)  | C3A-C9A-C10A-C11A   | -2.52(15)  |
| N1A-C1A-C2A-C8A   | -95.60(9)  | C14A-O2A-C11A-C12A  | -6.52(13)  |
| C6A-C1A-C2A-C8A   | 145.93(8)  | C14A-O2A-C11A-C10A  | 173.65(8)  |
| C7A-C1A-C2A-C8A   | 25.59(12)  | C9A-C10A-C11A-O2A   | -179.36(9) |
| N2A-C2A-C3A-C4A   | -125.58(9) | C9A-C10A-C11A-C12A  | 0.80(15)   |
| C8A-C2A-C3A-C4A   | 107.14(9)  | O2A-C11A-C12A-C4A   | -178.28(9) |
| C1A-C2A-C3A-C4A   | -15.20(10) | C10A-C11A-C12A-C4A  | 1.53(14)   |
| N2A-C2A-C3A-C9A   | 57.80(13)  | C3A-C4A-C12A-C11A   | -2.28(14)  |
| C8A-C2A-C3A-C9A   | -69.49(13) | N1A-C4A-C12A-C11A   | -177.94(9) |
| C1A-C2A-C3A-C9A   | 168.17(10) | C6A-C5A-C15A-C16A   | 0.10(14)   |
| C9A-C3A-C4A-C12A  | 0.65(14)   | N2A-C5A-C15A-C16A   | -177.70(9) |
| C2A-C3A-C4A-C12A  | -176.42(9) | C19A-O3A-C16A-C15A  | -1.48(14)  |
| C9A-C3A-C4A-N1A   | 176.93(8)  | C19A-O3A-C16A-C17A  | 178.85(10) |
| C2A-C3A-C4A-N1A   | -0.14(11)  | C5A-C15A-C16A-O3A   | -178.42(9) |
| C1A-N1A-C4A-C3A   | 16.94(10)  | C5A-C15A-C16A-C17A  | 1.22(15)   |
| C1A-N1A-C4A-C12A  | -166.95(9) | O3A-C16A-C17A-C18A  | 178.60(9)  |
| C2A-N2A-C5A-C6A   | 18.11(11)  | C15A-C16A-C17A-C18A | -1.07(15)  |
| C2A-N2A-C5A-C15A  | -163.88(9) | C20A-O4A-C18A-C6A   | 171.95(9)  |
| C15A-C5A-C6A-C18A | -1.55(15)  | C20A-O4A-C18A-C17A  | -10.25(15) |
| N2A-C5A-C6A-C18A  | 176.58(9)  | C5A-C6A-C18A-O4A    | 179.61(9)  |
| C15A-C5A-C6A-C1A  | -179.27(9) | C1A-C6A-C18A-O4A    | -3.17(15)  |
| N2A-C5A-C6A-C1A   | -1.14(11)  | C5A-C6A-C18A-C17A   | 1.70(15)   |
| N1A-C1A-C6A-C5A   | -125.22(9) | C1A-C6A-C18A-C17A   | 178.92(9)  |
| C7A-C1A-C6A-C5A   | 108.96(10) | C16A-C17A-C18A-O4A  | -178.12(9) |

|                    |             |                     |             |
|--------------------|-------------|---------------------|-------------|
| C16A-C17A-C18A-C6A | -0.42(15)   | C2B-C1B-C6B-C18B    | 166.64(11)  |
| C4B-N1B-C1B-C6B    | 81.76(11)   | N1B-C1B-C6B-C5B     | -127.33(9)  |
| C4B-N1B-C1B-C7B    | -150.91(9)  | C7B-C1B-C6B-C5B     | 105.39(10)  |
| C4B-N1B-C1B-C2B    | -26.84(10)  | C2B-C1B-C6B-C5B     | -16.94(10)  |
| C5B-N2B-C2B-C3B    | 81.08(11)   | C13B-O1B-C9B-C10B   | -3.42(15)   |
| C5B-N2B-C2B-C8B    | -151.50(9)  | C13B-O1B-C9B-C3B    | 176.13(10)  |
| C5B-N2B-C2B-C1B    | -27.51(10)  | C4B-C3B-C9B-O1B     | -178.46(9)  |
| N1B-C1B-C2B-N2B    | 145.76(8)   | C2B-C3B-C9B-O1B     | -5.60(16)   |
| C6B-C1B-C2B-N2B    | 26.04(10)   | C4B-C3B-C9B-C10B    | 1.10(15)    |
| C7B-C1B-C2B-N2B    | -93.16(10)  | C2B-C3B-C9B-C10B    | 173.96(10)  |
| N1B-C1B-C2B-C3B    | 25.90(9)    | O1B-C9B-C10B-C11B   | 177.70(9)   |
| C6B-C1B-C2B-C3B    | -93.81(9)   | C3B-C9B-C10B-C11B   | -1.83(16)   |
| C7B-C1B-C2B-C3B    | 146.99(9)   | C14B-O2B-C11B-C12B  | -13.14(15)  |
| N1B-C1B-C2B-C8B    | -93.09(10)  | C14B-O2B-C11B-C10B  | 166.71(10)  |
| C6B-C1B-C2B-C8B    | 147.20(9)   | C9B-C10B-C11B-O2B   | -177.93(9)  |
| C7B-C1B-C2B-C8B    | 27.99(13)   | C9B-C10B-C11B-C12B  | 1.92(16)    |
| N2B-C2B-C3B-C4B    | -128.10(10) | O2B-C11B-C12B-C4B   | 178.62(9)   |
| C8B-C2B-C3B-C4B    | 104.50(10)  | C10B-C11B-C12B-C4B  | -1.22(15)   |
| C1B-C2B-C3B-C4B    | -17.54(10)  | N1B-C4B-C12B-C11B   | -175.57(10) |
| N2B-C2B-C3B-C9B    | 58.54(15)   | C3B-C4B-C12B-C11B   | 0.47(15)    |
| C8B-C2B-C3B-C9B    | -68.86(14)  | C6B-C5B-C15B-C16B   | -0.21(16)   |
| C1B-C2B-C3B-C9B    | 169.10(11)  | N2B-C5B-C15B-C16B   | -176.98(10) |
| C1B-N1B-C4B-C3B    | 16.52(11)   | C19B-O3B-C16B-C15B  | -174.31(10) |
| C1B-N1B-C4B-C12B   | -167.05(10) | C19B-O3B-C16B-C17B  | 6.20(17)    |
| C9B-C3B-C4B-N1B    | 176.19(9)   | C5B-C15B-C16B-O3B   | -179.63(10) |
| C2B-C3B-C4B-N1B    | 1.90(12)    | C5B-C15B-C16B-C17B  | -0.14(17)   |
| C9B-C3B-C4B-C12B   | -0.42(15)   | O3B-C16B-C17B-C18B  | 179.80(10)  |
| C2B-C3B-C4B-C12B   | -174.71(9)  | C15B-C16B-C17B-C18B | 0.35(17)    |
| C2B-N2B-C5B-C15B   | -165.30(10) | C20B-O4B-C18B-C6B   | -177.93(13) |
| C2B-N2B-C5B-C6B    | 17.62(11)   | C20B-O4B-C18B-C17B  | 1.69(18)    |
| C15B-C5B-C6B-C18B  | 0.33(16)    | C5B-C6B-C18B-O4B    | 179.52(9)   |
| N2B-C5B-C6B-C18B   | 177.58(9)   | C1B-C6B-C18B-O4B    | -4.34(17)   |
| C15B-C5B-C6B-C1B   | -176.56(10) | C5B-C6B-C18B-C17B   | -0.11(16)   |
| N2B-C5B-C6B-C1B    | 0.69(12)    | C1B-C6B-C18B-C17B   | 176.03(10)  |
| N1B-C1B-C6B-C18B   | 56.25(15)   | C16B-C17B-C18B-O4B  | -179.82(10) |
| C7B-C1B-C6B-C18B   | -71.03(14)  | C16B-C17B-C18B-C6B  | -0.22(16)   |

**Table S14.** Hydrogen bonds and close contacts for (+/-)-**1** [*P*-1] [Å and °].

| D-H...A         | d(D-H)    | d(H...A)  | d(D...A)   | <(DHA)    |
|-----------------|-----------|-----------|------------|-----------|
| N2A-H2A...N2B#1 | 0.896(15) | 2.626(15) | 3.4956(13) | 164.1(12) |
| N2A-H2A...O1A   | 0.896(15) | 2.659(15) | 3.1569(12) | 116.1(11) |
| N1A-H1A...O4A   | 0.895(14) | 2.527(14) | 3.0904(12) | 121.5(11) |
| N1A-H1A...O4B#2 | 0.895(14) | 2.593(14) | 3.2205(13) | 127.8(11) |
| N1B-H1B...N1A#2 | 0.870(17) | 2.291(17) | 3.1324(13) | 162.8(16) |
| N2B-H2B...O1A#1 | 0.882(17) | 2.590(16) | 3.3220(13) | 141.0(13) |
| N2B-H2B...O1B   | 0.882(17) | 2.659(16) | 3.1895(13) | 119.7(13) |

Symmetry transformations used to generate equivalent atoms:

#1 -x+1,-y+1,-z+1 #2 -x+1,-y,-z+1

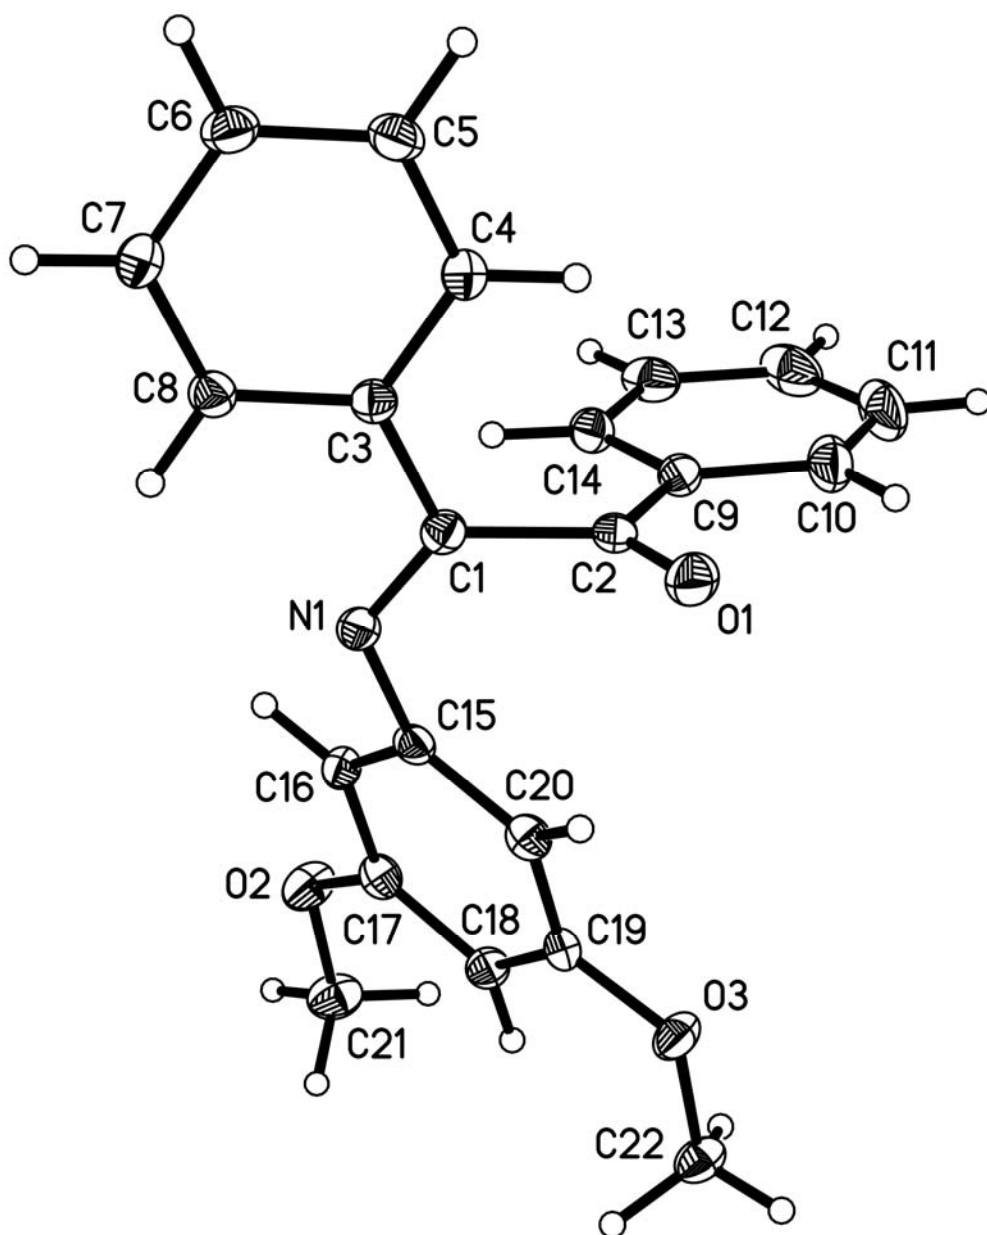

**Figure S51.** ORTEP diagram of **2** with thermal ellipsoids drawn at 50% probability level.

## Experimental Details for the Structure Determination of 2.

### Data collection

A crystal (0.36 x 0.22 x 0.04 mm<sup>3</sup>) was placed onto the tip of a 0.1 mm diameter glass capillary tube or fiber and mounted on a Bruker SMART APEX II CCD Platform diffractometer for a data collection at 100.0(1) K.<sup>1</sup> A preliminary set of cell constants and an orientation matrix were calculated from reflections harvested from three orthogonal wedges of reciprocal space. The full data collection was carried out using MoK $\alpha$  radiation (graphite monochromator) with a frame time of 60 seconds and a detector distance of 3.96 cm. A randomly oriented region of reciprocal space was surveyed: three major sections of frames were collected with 0.50° steps in  $\omega$  at three different  $\phi$  settings and a detector position of -38° in  $2\theta$ . The intensity data were corrected for absorption.<sup>2</sup> Final cell constants were calculated from the xyz centroids of 3489 strong reflections from the actual data collection after integration.<sup>3</sup> See Table S15 for additional crystal and refinement information.

### Structure solution and refinement

The structure was solved using SIR97<sup>4</sup> and refined using SHELXL-97.<sup>5</sup> The space group  $P2_1/c$  was determined based on systematic absences and intensity statistics. A direct-methods solution was calculated which provided most non-hydrogen atoms from the E-map. Full-matrix least squares / difference Fourier cycles were performed which located the remaining non-hydrogen atoms. All non-hydrogen atoms were refined with anisotropic displacement parameters. All hydrogen atoms were found from the difference Fourier map and refined independently from their bonded atoms with individual isotropic displacement parameters. The final full matrix least squares refinement converged to  $R1 = 0.0516$  ( $F^2$ ,  $I > 2\sigma(I)$ ) and  $wR2 = 0.1126$  ( $F^2$ , all data).

### Structure description

The structure is the one suggested with all atoms in general positions.

### References

- <sup>1</sup> APEX2, version 2009.3-0; Bruker AXS: Madison, WI, 2009.
- <sup>2</sup> Sheldrick, G. M. *SADABS*, version 2008/1; University of Göttingen: Göttingen, Germany, 2008.
- <sup>3</sup> SAINT, version 7.60A; Bruker AXS: Madison, WI, 2008.
- <sup>4</sup> Altomare, A.; Burla, M. C.; Camalli, M.; Cascarano, G. L.; Giacovazzo, C.; Guagliardi, A.; Moliterni, A. G. G.; Polidori, G.; Spagna, R. *SIR97: A new program for solving and refining crystal structures*; Istituto di Cristallografia, CNR: Bari, Italy, 1999.
- <sup>5</sup> Sheldrick, G. M. *Acta. Cryst.* **2008**, *A64*, 112-122.

### Some equations of interest:

$$R_{\text{int}} = \frac{\sum |F_o^2 - \langle F_o^2 \rangle|}{\sum F_o^2}$$
$$R1 = \frac{\sum ||F_o| - |F_c||}{\sum F_o}$$
$$wR2 = \frac{[\sum [w(F_o^2 - F_c^2)^2]]^{1/2}}{[\sum w(F_o^2)^2]^{1/2}}$$

where  $w = 1 / [\sigma^2(F_o^2) + (aP)^2 + bP]$  and

$$P = 1/3 \max(0, F_o^2) + 2/3 F_c^2$$
$$\text{GooF} = S = \frac{[\sum [w(F_o^2 - F_c^2)^2]]^{1/2}}{(m-n)^{1/2}}$$

where  $m$  = number of reflections and  $n$  = number of parameters

**Table S15.** Crystal data and structure refinement for **2**.

|                                                     |                                                               |                           |
|-----------------------------------------------------|---------------------------------------------------------------|---------------------------|
| Identification code                                 | <b>2</b> , JONJK48                                            |                           |
| Empirical formula                                   | C <sub>22</sub> H <sub>19</sub> N O <sub>3</sub>              |                           |
| Formula weight                                      | 345.38                                                        |                           |
| Temperature                                         | 100.0(1) K                                                    |                           |
| Wavelength                                          | 0.71073 Å                                                     |                           |
| Crystal system                                      | Monoclinic                                                    |                           |
| Space group                                         | <i>P</i> 2 <sub>1</sub> / <i>c</i>                            |                           |
| Unit cell dimensions                                | <i>a</i> = 8.4671(19) Å                                       | $\alpha = 90^\circ$       |
|                                                     | <i>b</i> = 23.820(5) Å                                        | $\beta = 99.090(5)^\circ$ |
|                                                     | <i>c</i> = 8.7557(18) Å                                       | $\gamma = 90^\circ$       |
| Volume                                              | 1743.7(6) Å <sup>3</sup>                                      |                           |
| <i>Z</i>                                            | 4                                                             |                           |
| Density (calculated)                                | 1.316 Mg/m <sup>3</sup>                                       |                           |
| Absorption coefficient                              | 0.088 mm <sup>-1</sup>                                        |                           |
| <i>F</i> (000)                                      | 728                                                           |                           |
| Crystal color, morphology                           | colorless, plate                                              |                           |
| Crystal size                                        | 0.36 x 0.22 x 0.04 mm <sup>3</sup>                            |                           |
| Theta range for data collection                     | 2.44 to 29.57°                                                |                           |
| Index ranges                                        | -11 ≤ <i>h</i> ≤ 11, -29 ≤ <i>k</i> ≤ 33, -12 ≤ <i>l</i> ≤ 11 |                           |
| Reflections collected                               | 17805                                                         |                           |
| Independent reflections                             | 4890 [ <i>R</i> (int) = 0.0851]                               |                           |
| Observed reflections                                | 2930                                                          |                           |
| Completeness to theta = 29.57°                      | 100.0%                                                        |                           |
| Absorption correction                               | Multi-scan                                                    |                           |
| Max. and min. transmission                          | 0.9965 and 0.9691                                             |                           |
| Refinement method                                   | Full-matrix least-squares on <i>F</i> <sup>2</sup>            |                           |
| Data / restraints / parameters                      | 4890 / 0 / 311                                                |                           |
| Goodness-of-fit on <i>F</i> <sup>2</sup>            | 1.006                                                         |                           |
| Final <i>R</i> indices [ <i>I</i> > 2σ( <i>I</i> )] | <i>R</i> 1 = 0.0516, <i>wR</i> 2 = 0.0938                     |                           |
| <i>R</i> indices (all data)                         | <i>R</i> 1 = 0.1076, <i>wR</i> 2 = 0.1126                     |                           |
| Largest diff. peak and hole                         | 0.289 and -0.249 e.Å <sup>-3</sup>                            |                           |

**Table S16.** Atomic coordinates ( $\times 10^4$ ) and equivalent isotropic displacement parameters ( $\text{\AA}^2 \times 10^3$ ) for **2**.  $U_{\text{eq}}$  is defined as one third of the trace of the orthogonalized  $U_{ij}$  tensor.

|     | x       | y       | z        | $U_{\text{eq}}$ |
|-----|---------|---------|----------|-----------------|
| O1  | 518(2)  | 3482(1) | 1455(1)  | 24(1)           |
| O2  | 5336(2) | 5904(1) | 2903(1)  | 24(1)           |
| O3  | 2004(2) | 5011(1) | -1436(1) | 21(1)           |
| N1  | 1578(2) | 4537(1) | 3806(2)  | 16(1)           |
| C1  | 1274(2) | 4010(1) | 3738(2)  | 16(1)           |
| C2  | 1627(2) | 3621(1) | 2457(2)  | 17(1)           |
| C3  | 563(2)  | 3740(1) | 4993(2)  | 16(1)           |
| C4  | 423(2)  | 3158(1) | 5074(2)  | 18(1)           |
| C5  | -143(2) | 2905(1) | 6307(2)  | 22(1)           |
| C6  | -573(2) | 3236(1) | 7479(2)  | 22(1)           |
| C7  | -459(2) | 3815(1) | 7402(2)  | 20(1)           |
| C8  | 102(2)  | 4067(1) | 6172(2)  | 18(1)           |
| C9  | 3275(2) | 3407(1) | 2521(2)  | 19(1)           |
| C10 | 3612(2) | 3015(1) | 1436(2)  | 27(1)           |
| C11 | 5145(3) | 2805(1) | 1518(2)  | 34(1)           |
| C12 | 6354(3) | 2986(1) | 2676(2)  | 32(1)           |
| C13 | 6032(2) | 3371(1) | 3759(2)  | 26(1)           |
| C14 | 4492(2) | 3581(1) | 3689(2)  | 21(1)           |
| C15 | 2319(2) | 4823(1) | 2684(2)  | 16(1)           |
| C16 | 3488(2) | 5212(1) | 3253(2)  | 17(1)           |
| C17 | 4185(2) | 5537(1) | 2235(2)  | 18(1)           |
| C18 | 3721(2) | 5490(1) | 644(2)   | 18(1)           |
| C19 | 2544(2) | 5098(1) | 99(2)    | 17(1)           |
| C20 | 1834(2) | 4765(1) | 1098(2)  | 18(1)           |
| C21 | 5978(2) | 6288(1) | 1907(2)  | 26(1)           |
| C22 | 2523(2) | 5397(1) | -2504(2) | 21(1)           |



**Table S17.** Bond lengths [Å] and angles [°] for **2**.

|             |            |                  |            |
|-------------|------------|------------------|------------|
| O(1)-C(2)   | 1.2243(19) | C(16)-H(16)      | 0.973(15)  |
| O(2)-C(17)  | 1.3706(19) | C(17)-C(18)      | 1.391(2)   |
| O(2)-C(21)  | 1.428(2)   | C(18)-C(19)      | 1.393(2)   |
| O(3)-C(19)  | 1.3651(19) | C(18)-H(18)      | 0.954(17)  |
| O(3)-C(22)  | 1.428(2)   | C(19)-C(20)      | 1.386(2)   |
| N(1)-C(1)   | 1.280(2)   | C(20)-H(20)      | 0.967(18)  |
| N(1)-C(15)  | 1.420(2)   | C(21)-H(21A)     | 0.996(19)  |
| C(1)-C(3)   | 1.481(2)   | C(21)-H(21B)     | 1.02(2)    |
| C(1)-C(2)   | 1.521(2)   | C(21)-H(21C)     | 1.01(2)    |
| C(2)-C(9)   | 1.478(2)   | C(22)-H(22A)     | 0.946(18)  |
| C(3)-C(4)   | 1.394(2)   | C(22)-H(22B)     | 1.01(2)    |
| C(3)-C(8)   | 1.397(2)   | C(22)-H(22C)     | 0.977(19)  |
| C(4)-C(5)   | 1.387(2)   | C(17)-O(2)-C(21) | 117.51(13) |
| C(4)-H(4)   | 0.969(18)  | C(19)-O(3)-C(22) | 117.25(13) |
| C(5)-C(6)   | 1.387(3)   | C(1)-N(1)-C(15)  | 123.05(14) |
| C(5)-H(5)   | 0.991(19)  | N(1)-C(1)-C(3)   | 119.57(15) |
| C(6)-C(7)   | 1.385(3)   | N(1)-C(1)-C(2)   | 124.76(15) |
| C(6)-H(6)   | 0.957(19)  | C(3)-C(1)-C(2)   | 115.65(14) |
| C(7)-C(8)   | 1.381(2)   | O(1)-C(2)-C(9)   | 123.18(15) |
| C(7)-H(7)   | 0.956(18)  | O(1)-C(2)-C(1)   | 118.31(15) |
| C(8)-H(8)   | 0.99(2)    | C(9)-C(2)-C(1)   | 118.45(14) |
| C(9)-C(10)  | 1.394(2)   | C(4)-C(3)-C(8)   | 118.72(16) |
| C(9)-C(14)  | 1.395(2)   | C(4)-C(3)-C(1)   | 121.16(15) |
| C(10)-C(11) | 1.382(3)   | C(8)-C(3)-C(1)   | 120.02(15) |
| C(10)-H(10) | 1.004(17)  | C(5)-C(4)-C(3)   | 121.01(17) |
| C(11)-C(12) | 1.390(3)   | C(5)-C(4)-H(4)   | 119.4(11)  |
| C(11)-H(11) | 0.92(2)    | C(3)-C(4)-H(4)   | 119.6(11)  |
| C(12)-C(13) | 1.377(3)   | C(4)-C(5)-C(6)   | 119.46(18) |
| C(12)-H(12) | 0.94(2)    | C(4)-C(5)-H(5)   | 121.2(10)  |
| C(13)-C(14) | 1.389(3)   | C(6)-C(5)-H(5)   | 119.3(10)  |
| C(13)-H(13) | 0.99(2)    | C(7)-C(6)-C(5)   | 120.09(17) |
| C(14)-H(14) | 0.949(18)  | C(7)-C(6)-H(6)   | 120.7(11)  |
| C(15)-C(16) | 1.391(2)   | C(5)-C(6)-H(6)   | 119.2(11)  |
| C(15)-C(20) | 1.392(2)   | C(8)-C(7)-C(6)   | 120.43(17) |
| C(16)-C(17) | 1.380(2)   | C(8)-C(7)-H(7)   | 117.7(11)  |

|                   |            |                     |            |
|-------------------|------------|---------------------|------------|
| C(6)-C(7)-H(7)    | 121.9(11)  | C(17)-C(16)-H(16)   | 122.4(10)  |
| C(7)-C(8)-C(3)    | 120.28(17) | C(15)-C(16)-H(16)   | 118.0(10)  |
| C(7)-C(8)-H(8)    | 121.1(11)  | O(2)-C(17)-C(16)    | 115.45(14) |
| C(3)-C(8)-H(8)    | 118.7(11)  | O(2)-C(17)-C(18)    | 123.26(15) |
| C(10)-C(9)-C(14)  | 119.42(17) | C(16)-C(17)-C(18)   | 121.29(16) |
| C(10)-C(9)-C(2)   | 119.91(16) | C(17)-C(18)-C(19)   | 118.10(16) |
| C(14)-C(9)-C(2)   | 120.64(15) | C(17)-C(18)-H(18)   | 121.4(10)  |
| C(11)-C(10)-C(9)  | 119.96(18) | C(19)-C(18)-H(18)   | 120.5(10)  |
| C(11)-C(10)-H(10) | 123.5(11)  | O(3)-C(19)-C(20)    | 115.08(15) |
| C(9)-C(10)-H(10)  | 116.6(11)  | O(3)-C(19)-C(18)    | 123.26(15) |
| C(10)-C(11)-C(12) | 120.16(19) | C(20)-C(19)-C(18)   | 121.66(15) |
| C(10)-C(11)-H(11) | 121.2(14)  | C(19)-C(20)-C(15)   | 118.97(16) |
| C(12)-C(11)-H(11) | 118.7(14)  | C(19)-C(20)-H(20)   | 119.8(10)  |
| C(13)-C(12)-C(11) | 120.4(2)   | C(15)-C(20)-H(20)   | 121.0(10)  |
| C(13)-C(12)-H(12) | 119.4(13)  | O(2)-C(21)-H(21A)   | 107.2(11)  |
| C(11)-C(12)-H(12) | 120.2(13)  | O(2)-C(21)-H(21B)   | 111.7(12)  |
| C(12)-C(13)-C(14) | 119.73(19) | H(21A)-C(21)-H(21B) | 108.9(16)  |
| C(12)-C(13)-H(13) | 121.7(12)  | O(2)-C(21)-H(21C)   | 110.0(12)  |
| C(14)-C(13)-H(13) | 118.6(12)  | H(21A)-C(21)-H(21C) | 107.9(15)  |
| C(13)-C(14)-C(9)  | 120.34(17) | H(21B)-C(21)-H(21C) | 111.0(15)  |
| C(13)-C(14)-H(14) | 121.7(11)  | O(3)-C(22)-H(22A)   | 105.8(12)  |
| C(9)-C(14)-H(14)  | 117.9(11)  | O(3)-C(22)-H(22B)   | 110.1(11)  |
| C(16)-C(15)-C(20) | 120.29(16) | H(22A)-C(22)-H(22B) | 110.7(15)  |
| C(16)-C(15)-N(1)  | 116.08(14) | O(3)-C(22)-H(22C)   | 109.1(10)  |
| C(20)-C(15)-N(1)  | 123.38(15) | H(22A)-C(22)-H(22C) | 109.9(15)  |
| C(17)-C(16)-C(15) | 119.68(15) | H(22B)-C(22)-H(22C) | 111.1(15)  |

---

**Table S18.** Anisotropic displacement parameters ( $\text{\AA}^2 \times 10^3$ ) for **2**. The anisotropic displacement factor exponent takes the form:  $-2\pi^2 [ h^2 a^{*2} U_{11} + \dots + 2 h k a^* b^* U_{12} ]$

|     | $U_{11}$ | $U_{22}$ | $U_{33}$ | $U_{23}$ | $U_{13}$ | $U_{12}$ |
|-----|----------|----------|----------|----------|----------|----------|
| O1  | 30(1)    | 22(1)    | 20(1)    | -1(1)    | 0(1)     | -4(1)    |
| O2  | 27(1)    | 26(1)    | 19(1)    | 1(1)     | 2(1)     | -11(1)   |
| O3  | 28(1)    | 22(1)    | 13(1)    | 1(1)     | 3(1)     | -6(1)    |
| N1  | 17(1)    | 17(1)    | 16(1)    | 1(1)     | 5(1)     | 1(1)     |
| C1  | 15(1)    | 18(1)    | 15(1)    | 1(1)     | 2(1)     | 2(1)     |
| C2  | 23(1)    | 13(1)    | 16(1)    | 2(1)     | 6(1)     | -2(1)    |
| C3  | 15(1)    | 16(1)    | 16(1)    | 1(1)     | 2(1)     | 0(1)     |
| C4  | 20(1)    | 18(1)    | 18(1)    | -1(1)    | 5(1)     | 2(1)     |
| C5  | 25(1)    | 16(1)    | 24(1)    | 3(1)     | 5(1)     | 1(1)     |
| C6  | 24(1)    | 22(1)    | 20(1)    | 5(1)     | 6(1)     | 0(1)     |
| C7  | 20(1)    | 22(1)    | 18(1)    | -1(1)    | 7(1)     | 1(1)     |
| C8  | 18(1)    | 17(1)    | 19(1)    | 1(1)     | 4(1)     | 2(1)     |
| C9  | 26(1)    | 16(1)    | 18(1)    | 1(1)     | 10(1)    | 0(1)     |
| C10 | 36(1)    | 22(1)    | 25(1)    | -4(1)    | 13(1)    | -2(1)    |
| C11 | 47(1)    | 23(1)    | 39(1)    | -4(1)    | 27(1)    | 6(1)     |
| C12 | 31(1)    | 26(1)    | 45(1)    | 8(1)     | 19(1)    | 10(1)    |
| C13 | 26(1)    | 24(1)    | 31(1)    | 8(1)     | 9(1)     | 2(1)     |
| C14 | 24(1)    | 18(1)    | 20(1)    | 1(1)     | 8(1)     | 2(1)     |
| C15 | 18(1)    | 14(1)    | 18(1)    | 2(1)     | 7(1)     | 3(1)     |
| C16 | 19(1)    | 18(1)    | 14(1)    | -2(1)    | 2(1)     | 2(1)     |
| C17 | 17(1)    | 16(1)    | 21(1)    | -1(1)    | 3(1)     | -1(1)    |
| C18 | 20(1)    | 17(1)    | 18(1)    | 2(1)     | 6(1)     | -1(1)    |
| C19 | 21(1)    | 14(1)    | 16(1)    | -2(1)    | 4(1)     | 4(1)     |
| C20 | 17(1)    | 16(1)    | 20(1)    | 0(1)     | 4(1)     | 0(1)     |
| C21 | 26(1)    | 25(1)    | 25(1)    | 5(1)     | 3(1)     | -8(1)    |
| C22 | 24(1)    | 24(1)    | 16(1)    | 4(1)     | 4(1)     | -3(1)    |

**Table S19.** Hydrogen coordinates ( $\times 10^4$ ) and isotropic displacement parameters ( $\text{\AA}^2 \times 10^3$ ) for **2**.

|      | x        | y       | z         | $U_{\text{(eq)}}$ |
|------|----------|---------|-----------|-------------------|
| H4   | 760(20)  | 2926(7) | 4276(19)  | 17(5)             |
| H5   | -250(20) | 2492(8) | 6366(19)  | 23(5)             |
| H6   | -940(20) | 3059(8) | 8340(20)  | 27(5)             |
| H7   | -760(20) | 4054(7) | 8190(20)  | 20(5)             |
| H8   | 190(20)  | 4482(9) | 6110(20)  | 34(6)             |
| H10  | 2700(20) | 2901(8) | 620(20)   | 23(5)             |
| H11  | 5390(30) | 2545(9) | 820(20)   | 47(7)             |
| H12  | 7390(30) | 2841(9) | 2740(20)  | 42(6)             |
| H13  | 6870(20) | 3499(8) | 4600(20)  | 32(6)             |
| H14  | 4220(20) | 3834(7) | 4440(20)  | 20(5)             |
| H16  | 3772(19) | 5249(7) | 4370(18)  | 10(4)             |
| H18  | 4200(20) | 5715(7) | -61(18)   | 13(4)             |
| H20  | 960(20)  | 4520(7) | 691(19)   | 19(5)             |
| H21A | 6720(20) | 6542(8) | 2580(20)  | 27(5)             |
| H21B | 6600(30) | 6085(9) | 1160(20)  | 38(6)             |
| H21C | 5090(30) | 6525(8) | 1330(20)  | 31(5)             |
| H22A | 2020(20) | 5281(8) | -3500(20) | 25(5)             |
| H22B | 2190(20) | 5792(9) | -2270(20) | 26(5)             |
| H22C | 3680(20) | 5369(7) | -2436(18) | 19(5)             |

**Table S20.** Torsion angles [°] for **2**.

|                |             |                 |             |
|----------------|-------------|-----------------|-------------|
| C15-N1-C1-C3   | 177.33(14)  | C9-C10-C11-C12  | -0.4(3)     |
| C15-N1-C1-C2   | -1.0(2)     | C10-C11-C12-C13 | 0.8(3)      |
| N1-C1-C2-O1    | -102.2(2)   | C11-C12-C13-C14 | -0.3(3)     |
| C3-C1-C2-O1    | 79.36(19)   | C12-C13-C14-C9  | -0.4(3)     |
| N1-C1-C2-C9    | 80.6(2)     | C10-C9-C14-C13  | 0.8(3)      |
| C3-C1-C2-C9    | -97.83(18)  | C2-C9-C14-C13   | 178.81(16)  |
| N1-C1-C3-C4    | -170.83(15) | C1-N1-C15-C16   | -137.82(17) |
| C2-C1-C3-C4    | 7.7(2)      | C1-N1-C15-C20   | 47.9(2)     |
| N1-C1-C3-C8    | 5.5(2)      | C20-C15-C16-C17 | -1.0(3)     |
| C2-C1-C3-C8    | -176.01(15) | N1-C15-C16-C17  | -175.43(15) |
| C8-C3-C4-C5    | -0.7(3)     | C21-O2-C17-C16  | -173.86(16) |
| C1-C3-C4-C5    | 175.61(16)  | C21-O2-C17-C18  | 5.5(2)      |
| C3-C4-C5-C6    | -0.2(3)     | C15-C16-C17-O2  | -179.34(15) |
| C4-C5-C6-C7    | 1.0(3)      | C15-C16-C17-C18 | 1.3(3)      |
| C5-C6-C7-C8    | -0.8(3)     | O2-C17-C18-C19  | 179.60(15)  |
| C6-C7-C8-C3    | -0.1(3)     | C16-C17-C18-C19 | -1.1(3)     |
| C4-C3-C8-C7    | 0.9(3)      | C22-O3-C19-C20  | 171.22(16)  |
| C1-C3-C8-C7    | -175.50(15) | C22-O3-C19-C18  | -8.8(2)     |
| O1-C2-C9-C10   | -2.1(3)     | C17-C18-C19-O3  | -179.43(16) |
| C1-C2-C9-C10   | 174.93(16)  | C17-C18-C19-C20 | 0.6(2)      |
| O1-C2-C9-C14   | 179.85(16)  | O3-C19-C20-C15  | 179.68(15)  |
| C1-C2-C9-C14   | -3.1(2)     | C18-C19-C20-C15 | -0.3(2)     |
| C14-C9-C10-C11 | -0.3(3)     | C16-C15-C20-C19 | 0.5(2)      |
| C2-C9-C10-C11  | -178.38(17) | N1-C15-C20-C19  | 174.55(15)  |

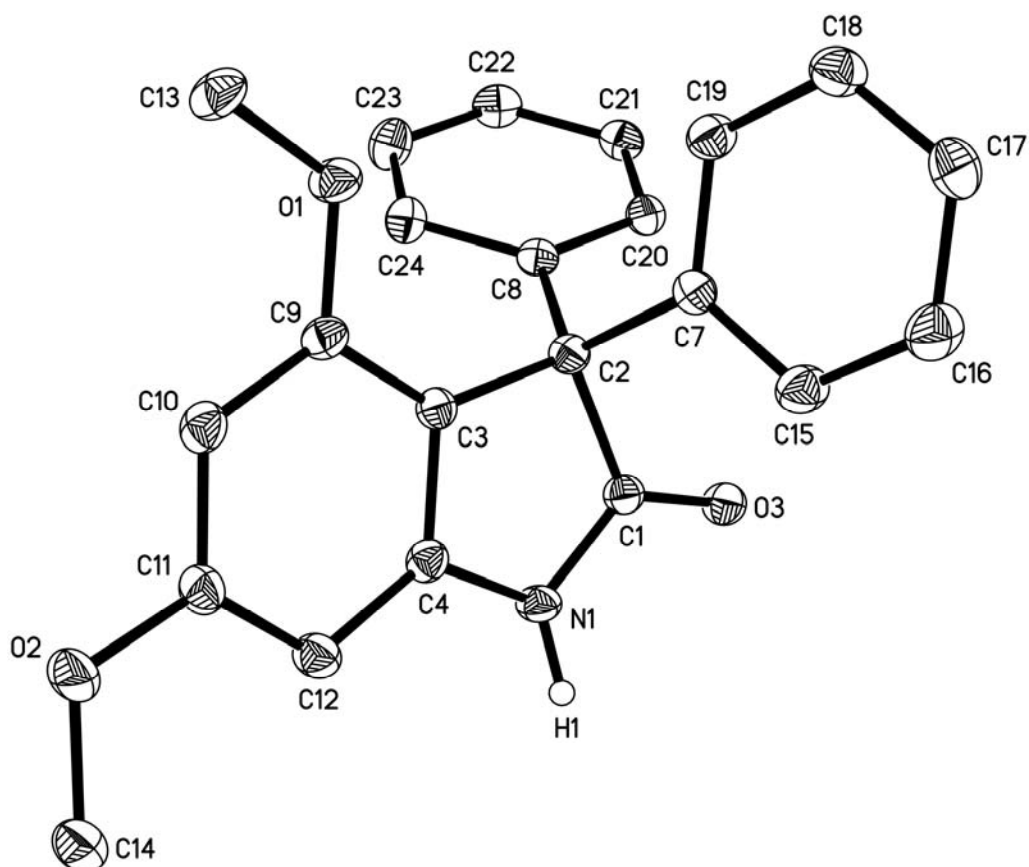

**Figure S52.** ORTEP diagram of **3** [*P*-1] with thermal ellipsoids drawn at 50% probability level. Hydrogen atoms were omitted for clarity, except for H1, to emphasize valency of the nitrogen atoms.

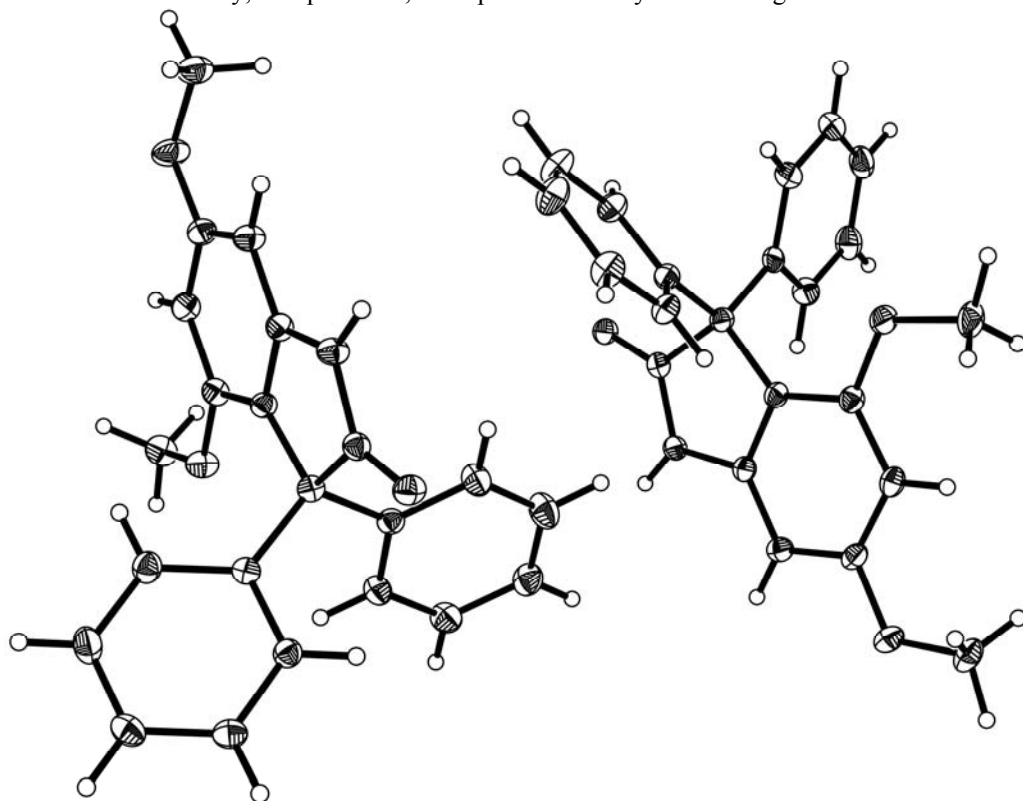

**Figure S53.** ORTEP diagram of asymmetric unit of **3** [*P*-1] with thermal ellipsoids drawn at 50% probability level.

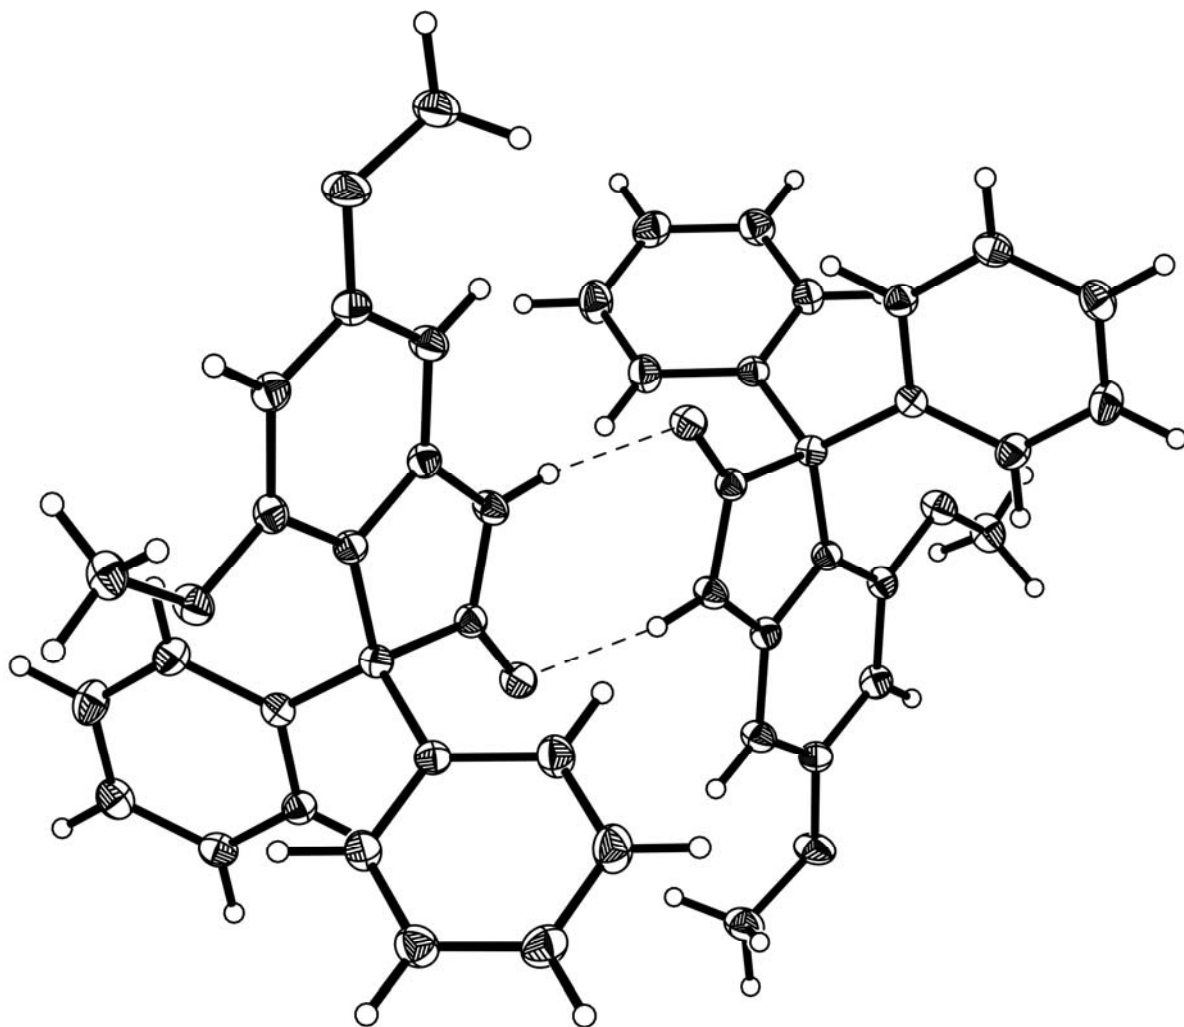

**Figure S54.** ORTEP diagram of **3** [*P*-1] showing intermolecular hydrogen bonding with thermal ellipsoids drawn at 50% probability level.

## Experimental Details for the Structure Determination of **3** [*P*-1].

### Data collection

A crystal (0.26 x 0.24 x 0.18 mm<sup>3</sup>) was placed onto the tip of a 0.1 mm diameter glass capillary tube or fiber and mounted on a Bruker SMART APEX II CCD Platform diffractometer for a data collection at 100.0(1) K.<sup>1</sup> A preliminary set of cell constants and an orientation matrix were calculated from reflections harvested from three orthogonal wedges of reciprocal space. The full data collection was carried out using MoK $\alpha$  radiation (graphite monochromator) with a frame time of 60 seconds and a detector distance of 4.00 cm. A randomly oriented region of reciprocal space was surveyed: four major sections of frames were collected with 0.50° steps in  $\omega$  at four different  $\phi$  settings and a detector position of -38° in  $2\theta$ . The intensity data were corrected for absorption.<sup>2</sup> Final cell constants were calculated from the xyz centroids of 4077 strong reflections from the actual data collection after integration.<sup>3</sup> See Table S21 for additional crystal and refinement information.

### Structure solution and refinement

The structure was solved using SIR97<sup>4</sup> and refined using SHELXL-97.<sup>5</sup> The space group *P*-1 was determined based on intensity statistics. A direct-methods solution was calculated which provided most non-hydrogen atoms from the E-map. Full-matrix least squares / difference Fourier cycles were performed which located the remaining non-hydrogen atoms. All non-hydrogen atoms were refined with anisotropic displacement parameters. All hydrogen atoms were placed in ideal positions and refined as riding atoms with relative isotropic displacement parameters. The final full matrix least squares refinement converged to  $R1 = 0.0620$  ( $F^2$ ,  $I > 2\sigma(I)$ ) and  $wR2 = 0.1631$  ( $F^2$ , all data).

### Structure description

The structure is the one suggested. There are two independent molecules in the asymmetric unit with all atoms in general positions. Each independent molecule is linked via moderate intermolecular hydrogen bonding to its symmetry equivalent (see Figure S54 and Table S27).

### References

- <sup>1</sup> APEX2, version 2011.4-1; Bruker AXS: Madison, WI, 2011.
- <sup>2</sup> Sheldrick, G. M. *SADABS*, version 2008/1; University of Göttingen: Göttingen, Germany, 2008.
- <sup>3</sup> SAINTE, version 7.68A; Bruker AXS: Madison, WI, 2009.
- <sup>4</sup> Altomare, A.; Burla, M. C.; Camalli, M.; Cascarano, G. L.; Giacovazzo, C.; Guagliardi, A.; Moliterni, A. G. G.; Polidori, G.; Spagna, R. *SIR97: A new program for solving and refining crystal structures*; Istituto di Cristallografia, CNR: Bari, Italy, 1999.
- <sup>5</sup> Sheldrick, G. M. *Acta. Cryst.* **2008**, *A64*, 112-122.

### Some equations of interest:

$$R_{\text{int}} = \frac{\sum |F_o^2 - \langle F_o^2 \rangle|}{\sum F_o^2}$$
$$R1 = \frac{\sum ||F_o| - |F_c||}{\sum |F_o|}$$
$$wR2 = \frac{[\sum [w(F_o^2 - F_c^2)^2]]}{\sum [w(F_o^2)^2]}^{1/2}$$

where  $w = 1 / [\sigma^2(F_o^2) + (aP)^2 + bP]$  and

$$P = 1/3 \max(0, F_o^2) + 2/3 F_c^2$$
$$\text{Goof} = S = \frac{[\sum [w(F_o^2 - F_c^2)^2]]}{(m-n)}^{1/2}$$

where  $m$  = number of reflections and  $n$  = number of parameters



**Table S21.** Crystal data and structure refinement for **3** [*P*-1].

|                                                     |                                                               |                       |
|-----------------------------------------------------|---------------------------------------------------------------|-----------------------|
| Identification code                                 | <b>3</b> , JONJK59                                            |                       |
| Empirical formula                                   | C <sub>22</sub> H <sub>19</sub> N O <sub>3</sub>              |                       |
| Formula weight                                      | 345.38                                                        |                       |
| Temperature                                         | 100.0(1) K                                                    |                       |
| Wavelength                                          | 0.71073 Å                                                     |                       |
| Crystal system                                      | Triclinic                                                     |                       |
| Space group                                         | <i>P</i> -1                                                   |                       |
| Unit cell dimensions                                | <i>a</i> = 9.9208(19) Å                                       | $\alpha$ = 78.473(4)° |
|                                                     | <i>b</i> = 13.015(3) Å                                        | $\beta$ = 82.317(4)°  |
|                                                     | <i>c</i> = 13.699(3) Å                                        | $\gamma$ = 83.248(4)° |
| Volume                                              | 1710.0(6) Å <sup>3</sup>                                      |                       |
| <i>Z</i>                                            | 4                                                             |                       |
| Density (calculated)                                | 1.342 Mg/m <sup>3</sup>                                       |                       |
| Absorption coefficient                              | 0.089 mm <sup>-1</sup>                                        |                       |
| <i>F</i> (000)                                      | 728                                                           |                       |
| Crystal color, morphology                           | colorless, block                                              |                       |
| Crystal size                                        | 0.26 x 0.24 x 0.18 mm <sup>3</sup>                            |                       |
| Theta range for data collection                     | 1.60 to 34.97°                                                |                       |
| Index ranges                                        | -15 ≤ <i>h</i> ≤ 15, -20 ≤ <i>k</i> ≤ 20, -22 ≤ <i>l</i> ≤ 22 |                       |
| Reflections collected                               | 37134                                                         |                       |
| Independent reflections                             | 14795 [ <i>R</i> (int) = 0.0768]                              |                       |
| Observed reflections                                | 8102                                                          |                       |
| Completeness to theta = 34.97°                      | 98.7%                                                         |                       |
| Absorption correction                               | Multi-scan                                                    |                       |
| Max. and min. transmission                          | 0.9841 and 0.9771                                             |                       |
| Refinement method                                   | Full-matrix least-squares on <i>F</i> <sup>2</sup>            |                       |
| Data / restraints / parameters                      | 14795 / 0 / 477                                               |                       |
| Goodness-of-fit on <i>F</i> <sup>2</sup>            | 0.992                                                         |                       |
| Final <i>R</i> indices [ <i>I</i> > 2σ( <i>I</i> )] | <i>R</i> 1 = 0.0620, <i>wR</i> 2 = 0.1337                     |                       |
| <i>R</i> indices (all data)                         | <i>R</i> 1 = 0.1231, <i>wR</i> 2 = 0.1631                     |                       |
| Largest diff. peak and hole                         | 0.502 and -0.336 e.Å <sup>-3</sup>                            |                       |

**Table S22.** Atomic coordinates ( $\times 10^4$ ) and equivalent isotropic displacement parameters ( $\text{\AA}^2 \times 10^3$ ) for **3** [*P*-1].  $U_{\text{eq}}$  is defined as one third of the trace of the orthogonalized  $U_{ij}$  tensor.

|     | x        | y       | z       | $U_{\text{eq}}$ |
|-----|----------|---------|---------|-----------------|
| O1  | 623(1)   | 4370(1) | 3699(1) | 20(1)           |
| O2  | -844(1)  | 3181(1) | 965(1)  | 25(1)           |
| O3  | 5150(1)  | 5592(1) | 1096(1) | 19(1)           |
| N1  | 3359(1)  | 4889(1) | 657(1)  | 17(1)           |
| C1  | 4033(1)  | 5238(1) | 1302(1) | 16(1)           |
| C2  | 3176(1)  | 5094(1) | 2346(1) | 15(1)           |
| C3  | 1959(1)  | 4601(1) | 2133(1) | 15(1)           |
| C4  | 2146(1)  | 4478(1) | 1140(1) | 16(1)           |
| C7  | 4040(1)  | 4328(1) | 3080(1) | 16(1)           |
| C8  | 2883(1)  | 6182(1) | 2629(1) | 14(1)           |
| C9  | 790(1)   | 4234(1) | 2725(1) | 16(1)           |
| C10 | -134(2)  | 3762(1) | 2306(1) | 18(1)           |
| C11 | 111(2)   | 3662(1) | 1299(1) | 19(1)           |
| C12 | 1260(2)  | 4028(1) | 689(1)  | 19(1)           |
| C13 | -529(2)  | 3948(1) | 4336(1) | 22(1)           |
| C14 | -534(2)  | 2972(1) | -32(1)  | 25(1)           |
| C15 | 5003(2)  | 3576(1) | 2740(1) | 22(1)           |
| C16 | 5821(2)  | 2910(1) | 3390(1) | 26(1)           |
| C17 | 5680(2)  | 2980(1) | 4392(1) | 24(1)           |
| C18 | 4700(2)  | 3707(1) | 4744(1) | 23(1)           |
| C19 | 3885(2)  | 4376(1) | 4092(1) | 19(1)           |
| C20 | 3978(2)  | 6675(1) | 2808(1) | 16(1)           |
| C21 | 3776(2)  | 7670(1) | 3047(1) | 19(1)           |
| C22 | 2476(2)  | 8193(1) | 3108(1) | 21(1)           |
| C23 | 1383(2)  | 7719(1) | 2919(1) | 24(1)           |
| C24 | 1583(2)  | 6714(1) | 2684(1) | 19(1)           |
| O4  | 9752(1)  | 37(1)   | 1478(1) | 21(1)           |
| O5  | 11178(1) | 1528(1) | 4120(1) | 21(1)           |
| O6  | 4926(1)  | -409(1) | 3865(1) | 18(1)           |
| N2  | 6732(1)  | 299(1)  | 4296(1) | 15(1)           |
| C31 | 6081(1)  | -123(1) | 3680(1) | 15(1)           |
| C32 | 7050(1)  | -192(1) | 2700(1) | 15(1)           |
| C33 | 8300(1)  | 234(1)  | 2930(1) | 15(1)           |

|     |          |          |         |       |
|-----|----------|----------|---------|-------|
| C34 | 8060(1)  | 522(1)   | 3867(1) | 15(1) |
| C37 | 7332(1)  | -1358(1) | 2622(1) | 16(1) |
| C38 | 6338(1)  | 520(1)   | 1844(1) | 16(1) |
| C39 | 9571(1)  | 356(1)   | 2380(1) | 16(1) |
| C40 | 10566(1) | 795(1)   | 2760(1) | 17(1) |
| C41 | 10274(1) | 1094(1)  | 3693(1) | 17(1) |
| C42 | 9010(2)  | 953(1)   | 4273(1) | 17(1) |
| C43 | 11082(2) | 76(1)    | 928(1)  | 25(1) |
| C44 | 12473(2) | 1739(1)  | 3551(1) | 24(1) |
| C45 | 7712(2)  | -2079(1) | 3464(1) | 21(1) |
| C46 | 7967(2)  | -3144(1) | 3443(1) | 25(1) |
| C47 | 7838(2)  | -3516(1) | 2586(1) | 25(1) |
| C48 | 7465(2)  | -2812(1) | 1746(1) | 26(1) |
| C49 | 7237(2)  | -1737(1) | 1757(1) | 21(1) |
| C50 | 5153(2)  | 239(1)   | 1562(1) | 20(1) |
| C51 | 4487(2)  | 898(1)   | 810(1)  | 25(1) |
| C52 | 4968(2)  | 1854(1)  | 343(1)  | 26(1) |
| C53 | 6121(2)  | 2144(1)  | 637(1)  | 23(1) |
| C54 | 6812(2)  | 1482(1)  | 1374(1) | 19(1) |

---

**Table S23.** Bond lengths [Å] and angles [°] for **3** [*P*-1].

|              |            |             |            |
|--------------|------------|-------------|------------|
| O(1)-C(9)    | 1.3663(17) | C(17)-H(17) | 0.9500     |
| O(1)-C(13)   | 1.4346(17) | C(18)-C(19) | 1.388(2)   |
| O(2)-C(11)   | 1.3668(18) | C(18)-H(18) | 0.9500     |
| O(2)-C(14)   | 1.433(2)   | C(19)-H(19) | 0.9500     |
| O(3)-C(1)    | 1.2272(17) | C(20)-C(21) | 1.384(2)   |
| N(1)-C(1)    | 1.3504(19) | C(20)-H(20) | 0.9500     |
| N(1)-C(4)    | 1.4029(18) | C(21)-C(22) | 1.386(2)   |
| N(1)-H(1)    | 0.89(2)    | C(21)-H(21) | 0.9500     |
| C(1)-C(2)    | 1.552(2)   | C(22)-C(23) | 1.386(2)   |
| C(2)-C(3)    | 1.5179(19) | C(22)-H(22) | 0.9500     |
| C(2)-C(8)    | 1.527(2)   | C(23)-C(24) | 1.395(2)   |
| C(2)-C(7)    | 1.539(2)   | C(23)-H(23) | 0.9500     |
| C(3)-C(4)    | 1.386(2)   | C(24)-H(24) | 0.9500     |
| C(3)-C(9)    | 1.3986(19) | O(4)-C(39)  | 1.3639(17) |
| C(4)-C(12)   | 1.382(2)   | O(4)-C(43)  | 1.4300(18) |
| C(7)-C(19)   | 1.388(2)   | O(5)-C(41)  | 1.3629(17) |
| C(7)-C(15)   | 1.390(2)   | O(5)-C(44)  | 1.4354(18) |
| C(8)-C(24)   | 1.390(2)   | O(6)-C(31)  | 1.2256(17) |
| C(8)-C(20)   | 1.396(2)   | N(2)-C(31)  | 1.3572(19) |
| C(9)-C(10)   | 1.401(2)   | N(2)-C(34)  | 1.4080(18) |
| C(10)-C(11)  | 1.398(2)   | N(2)-H(2)   | 0.909(19)  |
| C(10)-H(10)  | 0.9500     | C(31)-C(32) | 1.5556(19) |
| C(11)-C(12)  | 1.392(2)   | C(32)-C(33) | 1.5102(19) |
| C(12)-H(12)  | 0.9500     | C(32)-C(37) | 1.534(2)   |
| C(13)-H(13A) | 0.9800     | C(32)-C(38) | 1.537(2)   |
| C(13)-H(13B) | 0.9800     | C(33)-C(39) | 1.3886(19) |
| C(13)-H(13C) | 0.9800     | C(33)-C(34) | 1.391(2)   |
| C(14)-H(14A) | 0.9800     | C(34)-C(42) | 1.379(2)   |
| C(14)-H(14B) | 0.9800     | C(37)-C(49) | 1.388(2)   |
| C(14)-H(14C) | 0.9800     | C(37)-C(45) | 1.398(2)   |
| C(15)-C(16)  | 1.387(2)   | C(38)-C(54) | 1.393(2)   |
| C(15)-H(15)  | 0.9500     | C(38)-C(50) | 1.395(2)   |
| C(16)-C(17)  | 1.381(2)   | C(39)-C(40) | 1.401(2)   |
| C(16)-H(16)  | 0.9500     | C(40)-C(41) | 1.393(2)   |
| C(17)-C(18)  | 1.384(2)   | C(40)-H(40) | 0.9500     |

|                  |            |                     |            |
|------------------|------------|---------------------|------------|
| C(41)-C(42)      | 1.402(2)   | C(3)-C(2)-C(1)      | 100.98(11) |
| C(42)-H(42)      | 0.9500     | C(8)-C(2)-C(1)      | 106.99(11) |
| C(43)-H(43A)     | 0.9800     | C(7)-C(2)-C(1)      | 107.13(11) |
| C(43)-H(43B)     | 0.9800     | C(4)-C(3)-C(9)      | 117.52(13) |
| C(43)-H(43C)     | 0.9800     | C(4)-C(3)-C(2)      | 108.89(12) |
| C(44)-H(44A)     | 0.9800     | C(9)-C(3)-C(2)      | 133.54(13) |
| C(44)-H(44B)     | 0.9800     | C(12)-C(4)-C(3)     | 125.03(13) |
| C(44)-H(44C)     | 0.9800     | C(12)-C(4)-N(1)     | 124.90(13) |
| C(45)-C(46)      | 1.385(2)   | C(3)-C(4)-N(1)      | 110.06(12) |
| C(45)-H(45)      | 0.9500     | C(19)-C(7)-C(15)    | 118.47(14) |
| C(46)-C(47)      | 1.383(2)   | C(19)-C(7)-C(2)     | 120.97(13) |
| C(46)-H(46)      | 0.9500     | C(15)-C(7)-C(2)     | 120.56(13) |
| C(47)-C(48)      | 1.383(2)   | C(24)-C(8)-C(20)    | 118.83(13) |
| C(47)-H(47)      | 0.9500     | C(24)-C(8)-C(2)     | 122.78(13) |
| C(48)-C(49)      | 1.393(2)   | C(20)-C(8)-C(2)     | 118.36(12) |
| C(48)-H(48)      | 0.9500     | O(1)-C(9)-C(3)      | 116.49(13) |
| C(49)-H(49)      | 0.9500     | O(1)-C(9)-C(10)     | 123.81(13) |
| C(50)-C(51)      | 1.390(2)   | C(3)-C(9)-C(10)     | 119.70(13) |
| C(50)-H(50)      | 0.9500     | C(11)-C(10)-C(9)    | 120.07(13) |
| C(51)-C(52)      | 1.387(2)   | C(11)-C(10)-H(10)   | 120.0      |
| C(51)-H(51)      | 0.9500     | C(9)-C(10)-H(10)    | 120.0      |
| C(52)-C(53)      | 1.378(2)   | O(2)-C(11)-C(12)    | 122.99(13) |
| C(52)-H(52)      | 0.9500     | O(2)-C(11)-C(10)    | 115.53(13) |
| C(53)-C(54)      | 1.390(2)   | C(12)-C(11)-C(10)   | 121.48(13) |
| C(53)-H(53)      | 0.9500     | C(4)-C(12)-C(11)    | 116.19(14) |
| C(54)-H(54)      | 0.9500     | C(4)-C(12)-H(12)    | 121.9      |
| C(9)-O(1)-C(13)  | 117.48(12) | C(11)-C(12)-H(12)   | 121.9      |
| C(11)-O(2)-C(14) | 116.09(12) | O(1)-C(13)-H(13A)   | 109.5      |
| C(1)-N(1)-C(4)   | 111.24(12) | O(1)-C(13)-H(13B)   | 109.5      |
| C(1)-N(1)-H(1)   | 122.0(13)  | H(13A)-C(13)-H(13B) | 109.5      |
| C(4)-N(1)-H(1)   | 125.3(13)  | O(1)-C(13)-H(13C)   | 109.5      |
| O(3)-C(1)-N(1)   | 125.36(13) | H(13A)-C(13)-H(13C) | 109.5      |
| O(3)-C(1)-C(2)   | 125.88(13) | H(13B)-C(13)-H(13C) | 109.5      |
| N(1)-C(1)-C(2)   | 108.75(12) | O(2)-C(14)-H(14A)   | 109.5      |
| C(3)-C(2)-C(8)   | 116.49(12) | O(2)-C(14)-H(14B)   | 109.5      |
| C(3)-C(2)-C(7)   | 112.05(11) | H(14A)-C(14)-H(14B) | 109.5      |
| C(8)-C(2)-C(7)   | 112.03(11) | O(2)-C(14)-H(14C)   | 109.5      |

|                     |            |                     |            |
|---------------------|------------|---------------------|------------|
| H(14A)-C(14)-H(14C) | 109.5      | O(6)-C(31)-N(2)     | 125.91(13) |
| H(14B)-C(14)-H(14C) | 109.5      | O(6)-C(31)-C(32)    | 125.37(13) |
| C(16)-C(15)-C(7)    | 120.80(15) | N(2)-C(31)-C(32)    | 108.72(12) |
| C(16)-C(15)-H(15)   | 119.6      | C(33)-C(32)-C(37)   | 111.38(11) |
| C(7)-C(15)-H(15)    | 119.6      | C(33)-C(32)-C(38)   | 113.84(12) |
| C(17)-C(16)-C(15)   | 120.24(15) | C(37)-C(32)-C(38)   | 115.64(12) |
| C(17)-C(16)-H(16)   | 119.9      | C(33)-C(32)-C(31)   | 100.57(11) |
| C(15)-C(16)-H(16)   | 119.9      | C(37)-C(32)-C(31)   | 107.56(11) |
| C(16)-C(17)-C(18)   | 119.49(15) | C(38)-C(32)-C(31)   | 106.38(11) |
| C(16)-C(17)-H(17)   | 120.3      | C(39)-C(33)-C(34)   | 118.83(13) |
| C(18)-C(17)-H(17)   | 120.3      | C(39)-C(33)-C(32)   | 130.95(13) |
| C(17)-C(18)-C(19)   | 120.26(15) | C(34)-C(33)-C(32)   | 110.21(12) |
| C(17)-C(18)-H(18)   | 119.9      | C(42)-C(34)-C(33)   | 123.41(13) |
| C(19)-C(18)-H(18)   | 119.9      | C(42)-C(34)-N(2)    | 127.73(13) |
| C(18)-C(19)-C(7)    | 120.71(14) | C(33)-C(34)-N(2)    | 108.86(12) |
| C(18)-C(19)-H(19)   | 119.6      | C(49)-C(37)-C(45)   | 118.19(14) |
| C(7)-C(19)-H(19)    | 119.6      | C(49)-C(37)-C(32)   | 123.52(13) |
| C(21)-C(20)-C(8)    | 120.82(14) | C(45)-C(37)-C(32)   | 118.29(13) |
| C(21)-C(20)-H(20)   | 119.6      | C(54)-C(38)-C(50)   | 118.54(13) |
| C(8)-C(20)-H(20)    | 119.6      | C(54)-C(38)-C(32)   | 121.09(13) |
| C(20)-C(21)-C(22)   | 120.14(14) | C(50)-C(38)-C(32)   | 120.27(13) |
| C(20)-C(21)-H(21)   | 119.9      | O(4)-C(39)-C(33)    | 116.01(12) |
| C(22)-C(21)-H(21)   | 119.9      | O(4)-C(39)-C(40)    | 124.26(13) |
| C(21)-C(22)-C(23)   | 119.68(14) | C(33)-C(39)-C(40)   | 119.72(13) |
| C(21)-C(22)-H(22)   | 120.2      | C(41)-C(40)-C(39)   | 119.56(13) |
| C(23)-C(22)-H(22)   | 120.2      | C(41)-C(40)-H(40)   | 120.2      |
| C(22)-C(23)-C(24)   | 120.27(14) | C(39)-C(40)-H(40)   | 120.2      |
| C(22)-C(23)-H(23)   | 119.9      | O(5)-C(41)-C(40)    | 123.49(13) |
| C(24)-C(23)-H(23)   | 119.9      | O(5)-C(41)-C(42)    | 114.81(13) |
| C(8)-C(24)-C(23)    | 120.27(14) | C(40)-C(41)-C(42)   | 121.69(13) |
| C(8)-C(24)-H(24)    | 119.9      | C(34)-C(42)-C(41)   | 116.74(13) |
| C(23)-C(24)-H(24)   | 119.9      | C(34)-C(42)-H(42)   | 121.6      |
| C(39)-O(4)-C(43)    | 117.37(12) | C(41)-C(42)-H(42)   | 121.6      |
| C(41)-O(5)-C(44)    | 117.98(12) | O(4)-C(43)-H(43A)   | 109.5      |
| C(31)-N(2)-C(34)    | 111.62(12) | O(4)-C(43)-H(43B)   | 109.5      |
| C(31)-N(2)-H(2)     | 122.7(12)  | H(43A)-C(43)-H(43B) | 109.5      |
| C(34)-N(2)-H(2)     | 125.7(12)  | O(4)-C(43)-H(43C)   | 109.5      |

|                     |            |                   |            |
|---------------------|------------|-------------------|------------|
| H(43A)-C(43)-H(43C) | 109.5      | C(49)-C(48)-H(48) | 119.7      |
| H(43B)-C(43)-H(43C) | 109.5      | C(37)-C(49)-C(48) | 120.64(15) |
| O(5)-C(44)-H(44A)   | 109.5      | C(37)-C(49)-H(49) | 119.7      |
| O(5)-C(44)-H(44B)   | 109.5      | C(48)-C(49)-H(49) | 119.7      |
| H(44A)-C(44)-H(44B) | 109.5      | C(51)-C(50)-C(38) | 120.23(14) |
| O(5)-C(44)-H(44C)   | 109.5      | C(51)-C(50)-H(50) | 119.9      |
| H(44A)-C(44)-H(44C) | 109.5      | C(38)-C(50)-H(50) | 119.9      |
| H(44B)-C(44)-H(44C) | 109.5      | C(52)-C(51)-C(50) | 120.81(15) |
| C(46)-C(45)-C(37)   | 120.98(15) | C(52)-C(51)-H(51) | 119.6      |
| C(46)-C(45)-H(45)   | 119.5      | C(50)-C(51)-H(51) | 119.6      |
| C(37)-C(45)-H(45)   | 119.5      | C(53)-C(52)-C(51) | 119.06(14) |
| C(47)-C(46)-C(45)   | 120.36(15) | C(53)-C(52)-H(52) | 120.5      |
| C(47)-C(46)-H(46)   | 119.8      | C(51)-C(52)-H(52) | 120.5      |
| C(45)-C(46)-H(46)   | 119.8      | C(52)-C(53)-C(54) | 120.68(15) |
| C(46)-C(47)-C(48)   | 119.26(15) | C(52)-C(53)-H(53) | 119.7      |
| C(46)-C(47)-H(47)   | 120.4      | C(54)-C(53)-H(53) | 119.7      |
| C(48)-C(47)-H(47)   | 120.4      | C(53)-C(54)-C(38) | 120.65(14) |
| C(47)-C(48)-C(49)   | 120.52(15) | C(53)-C(54)-H(54) | 119.7      |
| C(47)-C(48)-H(48)   | 119.7      | C(38)-C(54)-H(54) | 119.7      |

---

**Table S24.** Anisotropic displacement parameters ( $\text{\AA}^2 \times 10^3$ ) for **3** [*P*-1]. The anisotropic displacement factor exponent takes the form:  $-2\pi^2 [h^2 a^{*2} U_{11} + \dots + 2 h k a^* b^* U_{12}]$

|     | $U_{11}$ | $U_{22}$ | $U_{33}$ | $U_{23}$ | $U_{13}$ | $U_{12}$ |
|-----|----------|----------|----------|----------|----------|----------|
| O1  | 20(1)    | 24(1)    | 15(1)    | -4(1)    | 3(1)     | -8(1)    |
| O2  | 22(1)    | 33(1)    | 24(1)    | -11(1)   | -1(1)    | -13(1)   |
| O3  | 17(1)    | 21(1)    | 18(1)    | -4(1)    | 0(1)     | -6(1)    |
| N1  | 18(1)    | 21(1)    | 13(1)    | -4(1)    | 1(1)     | -5(1)    |
| C1  | 16(1)    | 16(1)    | 14(1)    | -3(1)    | -1(1)    | -1(1)    |
| C2  | 15(1)    | 15(1)    | 14(1)    | -2(1)    | -1(1)    | -3(1)    |
| C3  | 14(1)    | 15(1)    | 16(1)    | -4(1)    | -1(1)    | -3(1)    |
| C4  | 14(1)    | 16(1)    | 17(1)    | -4(1)    | 0(1)     | -3(1)    |
| C7  | 16(1)    | 14(1)    | 17(1)    | -3(1)    | -2(1)    | -3(1)    |
| C8  | 17(1)    | 13(1)    | 13(1)    | -1(1)    | -1(1)    | -3(1)    |
| C9  | 16(1)    | 16(1)    | 15(1)    | -3(1)    | 1(1)     | -3(1)    |
| C10 | 16(1)    | 19(1)    | 21(1)    | -4(1)    | 1(1)     | -5(1)    |
| C11 | 17(1)    | 19(1)    | 22(1)    | -6(1)    | -3(1)    | -4(1)    |
| C12 | 19(1)    | 20(1)    | 18(1)    | -6(1)    | -2(1)    | -5(1)    |
| C13 | 21(1)    | 24(1)    | 20(1)    | -4(1)    | 6(1)     | -7(1)    |
| C14 | 24(1)    | 31(1)    | 24(1)    | -10(1)   | -3(1)    | -8(1)    |
| C15 | 25(1)    | 20(1)    | 19(1)    | -4(1)    | -2(1)    | 3(1)     |
| C16 | 29(1)    | 20(1)    | 25(1)    | -3(1)    | -2(1)    | 6(1)     |
| C17 | 24(1)    | 21(1)    | 24(1)    | 0(1)     | -8(1)    | 1(1)     |
| C18 | 27(1)    | 22(1)    | 18(1)    | -3(1)    | -4(1)    | 0(1)     |
| C19 | 20(1)    | 19(1)    | 18(1)    | -4(1)    | -1(1)    | 0(1)     |
| C20 | 16(1)    | 16(1)    | 17(1)    | -3(1)    | -2(1)    | -2(1)    |
| C21 | 22(1)    | 18(1)    | 18(1)    | -3(1)    | -2(1)    | -5(1)    |
| C22 | 27(1)    | 15(1)    | 22(1)    | -4(1)    | -2(1)    | -2(1)    |
| C23 | 20(1)    | 19(1)    | 30(1)    | -4(1)    | -2(1)    | 2(1)     |
| C24 | 17(1)    | 19(1)    | 22(1)    | -2(1)    | -2(1)    | -2(1)    |
| O4  | 15(1)    | 34(1)    | 16(1)    | -8(1)    | 2(1)     | -5(1)    |
| O5  | 18(1)    | 23(1)    | 25(1)    | -7(1)    | -4(1)    | -6(1)    |
| O6  | 15(1)    | 20(1)    | 18(1)    | -4(1)    | 1(1)     | -4(1)    |
| N2  | 14(1)    | 18(1)    | 13(1)    | -4(1)    | 1(1)     | -2(1)    |
| C31 | 15(1)    | 13(1)    | 15(1)    | -1(1)    | 0(1)     | -1(1)    |
| C32 | 14(1)    | 18(1)    | 14(1)    | -3(1)    | 0(1)     | -3(1)    |
| C33 | 13(1)    | 16(1)    | 15(1)    | -2(1)    | -1(1)    | -2(1)    |



|     |       |       |       |        |       |       |
|-----|-------|-------|-------|--------|-------|-------|
| C34 | 14(1) | 14(1) | 15(1) | -1(1)  | -2(1) | -1(1) |
| C37 | 12(1) | 18(1) | 18(1) | -5(1)  | 2(1)  | -2(1) |
| C38 | 15(1) | 18(1) | 13(1) | -2(1)  | -1(1) | -2(1) |
| C39 | 14(1) | 18(1) | 15(1) | -2(1)  | -1(1) | -2(1) |
| C40 | 13(1) | 18(1) | 19(1) | 0(1)   | -1(1) | -3(1) |
| C41 | 15(1) | 15(1) | 21(1) | -2(1)  | -6(1) | -2(1) |
| C42 | 18(1) | 16(1) | 17(1) | -3(1)  | -4(1) | -2(1) |
| C43 | 14(1) | 39(1) | 19(1) | -4(1)  | 3(1)  | -2(1) |
| C44 | 15(1) | 26(1) | 30(1) | -4(1)  | -3(1) | -6(1) |
| C45 | 21(1) | 21(1) | 20(1) | -3(1)  | -2(1) | -1(1) |
| C46 | 23(1) | 20(1) | 30(1) | -1(1)  | -1(1) | 2(1)  |
| C47 | 19(1) | 19(1) | 39(1) | -10(1) | 1(1)  | 0(1)  |
| C48 | 22(1) | 28(1) | 30(1) | -15(1) | -2(1) | 2(1)  |
| C49 | 21(1) | 24(1) | 18(1) | -8(1)  | -2(1) | 0(1)  |
| C50 | 18(1) | 21(1) | 20(1) | 0(1)   | -3(1) | -5(1) |
| C51 | 18(1) | 32(1) | 25(1) | 2(1)   | -8(1) | -6(1) |
| C52 | 23(1) | 27(1) | 23(1) | 6(1)   | -7(1) | -2(1) |
| C53 | 23(1) | 20(1) | 24(1) | 2(1)   | -4(1) | -4(1) |
| C54 | 16(1) | 20(1) | 21(1) | -2(1)  | -3(1) | -3(1) |

---

**Table S25.** Hydrogen coordinates ( $\times 10^4$ ) and isotropic displacement parameters ( $\text{\AA}^2 \times 10^3$ ) for **3** [*P*-1].

|      | x        | y        | z        | $U_{\text{(eq)}}$ |
|------|----------|----------|----------|-------------------|
| H1   | 3750(20) | 4799(15) | 55(15)   | 31(5)             |
| H10  | -928     | 3510     | 2707     | 22                |
| H12  | 1425     | 3971     | 2        | 22                |
| H13A | -535     | 4100     | 5009     | 33                |
| H13B | -466     | 3185     | 4374     | 33                |
| H13C | -1373    | 4273     | 4060     | 33                |
| H14A | -1283    | 2633     | -198     | 38                |
| H14B | 313      | 2504     | -75      | 38                |
| H14C | -419     | 3635     | -507     | 38                |
| H15  | 5103     | 3517     | 2053     | 26                |
| H16  | 6481     | 2404     | 3146     | 31                |
| H17  | 6250     | 2532     | 4836     | 29                |
| H18  | 4585     | 3749     | 5436     | 27                |
| H19  | 3214     | 4872     | 4342     | 23                |
| H20  | 4873     | 6323     | 2765     | 20                |
| H21  | 4530     | 7995     | 3170     | 23                |
| H22  | 2336     | 8873     | 3280     | 26                |
| H23  | 493      | 8081     | 2949     | 28                |
| H24  | 828      | 6391     | 2561     | 23                |
| H2   | 6330(20) | 420(15)  | 4905(15) | 28(5)             |
| H40  | 11434    | 889      | 2385     | 21                |
| H42  | 8818     | 1144     | 4915     | 20                |
| H43A | 11080    | -174     | 299      | 37                |
| H43B | 11749    | -374     | 1329     | 37                |
| H43C | 11328    | 803      | 779      | 37                |
| H44A | 13017    | 2052     | 3941     | 35                |
| H44B | 12325    | 2229     | 2923     | 35                |
| H44C | 12960    | 1079     | 3400     | 35                |
| H45  | 7797     | -1835    | 4060     | 25                |
| H46  | 8231     | -3622    | 4021     | 30                |
| H47  | 8005     | -4248    | 2573     | 30                |
| H48  | 7364     | -3062    | 1157     | 31                |
| H49  | 7015     | -1259    | 1168     | 25                |

|     |      |      |      |    |
|-----|------|------|------|----|
| H50 | 4799 | -406 | 1886 | 24 |
| H51 | 3693 | 692  | 612  | 30 |
| H52 | 4510 | 2301 | -171 | 31 |
| H53 | 6446 | 2805 | 332  | 28 |
| H54 | 7616 | 1688 | 1559 | 23 |

---

**Table S26.** Torsion angles [°] for **3** [*P*-1].

|               |             |                 |             |
|---------------|-------------|-----------------|-------------|
| C4-N1-C1-O3   | 176.59(14)  | C2-C3-C9-O1     | 3.5(2)      |
| C4-N1-C1-C2   | -2.19(16)   | C4-C3-C9-C10    | 0.1(2)      |
| O3-C1-C2-C3   | -178.13(14) | C2-C3-C9-C10    | -176.81(14) |
| N1-C1-C2-C3   | 0.65(14)    | O1-C9-C10-C11   | 179.51(14)  |
| O3-C1-C2-C8   | 59.56(18)   | C3-C9-C10-C11   | -0.2(2)     |
| N1-C1-C2-C8   | -121.66(13) | C14-O2-C11-C12  | 6.1(2)      |
| O3-C1-C2-C7   | -60.74(18)  | C14-O2-C11-C10  | -173.58(14) |
| N1-C1-C2-C7   | 118.04(13)  | C9-C10-C11-O2   | 179.35(13)  |
| C8-C2-C3-C4   | 116.53(14)  | C9-C10-C11-C12  | -0.4(2)     |
| C7-C2-C3-C4   | -112.62(13) | C3-C4-C12-C11   | -1.0(2)     |
| C1-C2-C3-C4   | 1.11(15)    | N1-C4-C12-C11   | 179.71(14)  |
| C8-C2-C3-C9   | -66.3(2)    | O2-C11-C12-C4   | -178.77(14) |
| C7-C2-C3-C9   | 64.5(2)     | C10-C11-C12-C4  | 0.9(2)      |
| C1-C2-C3-C9   | 178.25(15)  | C19-C7-C15-C16  | -1.9(2)     |
| C9-C3-C4-C12  | 0.5(2)      | C2-C7-C15-C16   | 177.51(14)  |
| C2-C3-C4-C12  | 178.15(13)  | C7-C15-C16-C17  | 0.6(3)      |
| C9-C3-C4-N1   | 179.86(12)  | C15-C16-C17-C18 | 1.1(3)      |
| C2-C3-C4-N1   | -2.48(16)   | C16-C17-C18-C19 | -1.3(3)     |
| C1-N1-C4-C12  | -177.62(14) | C17-C18-C19-C7  | -0.1(2)     |
| C1-N1-C4-C3   | 3.00(17)    | C15-C7-C19-C18  | 1.7(2)      |
| C3-C2-C7-C19  | -98.58(16)  | C2-C7-C19-C18   | -177.74(14) |
| C8-C2-C7-C19  | 34.51(18)   | C24-C8-C20-C21  | 0.8(2)      |
| C1-C2-C7-C19  | 151.54(13)  | C2-C8-C20-C21   | 178.67(13)  |
| C3-C2-C7-C15  | 81.98(17)   | C8-C20-C21-C22  | -0.3(2)     |
| C8-C2-C7-C15  | -144.93(14) | C20-C21-C22-C23 | -0.7(2)     |
| C1-C2-C7-C15  | -27.90(18)  | C21-C22-C23-C24 | 1.1(2)      |
| C3-C2-C8-C24  | -0.67(19)   | C20-C8-C24-C23  | -0.3(2)     |
| C7-C2-C8-C24  | -131.53(14) | C2-C8-C24-C23   | -178.17(14) |
| C1-C2-C8-C24  | 111.35(15)  | C22-C23-C24-C8  | -0.6(2)     |
| C3-C2-C8-C20  | -178.50(12) | C34-N2-C31-O6   | 178.69(13)  |
| C7-C2-C8-C20  | 50.64(16)   | C34-N2-C31-C32  | -0.87(16)   |
| C1-C2-C8-C20  | -66.48(15)  | O6-C31-C32-C33  | -178.15(14) |
| C13-O1-C9-C3  | -176.66(13) | N2-C31-C32-C33  | 1.42(14)    |
| C13-O1-C9-C10 | 3.6(2)      | O6-C31-C32-C37  | -61.53(17)  |
| C4-C3-C9-O1   | -179.59(13) | N2-C31-C32-C37  | 118.03(12)  |

|                 |             |                 |             |
|-----------------|-------------|-----------------|-------------|
| O6-C31-C32-C38  | 62.94(17)   | C32-C33-C39-O4  | -0.5(2)     |
| N2-C31-C32-C38  | -117.49(12) | C34-C33-C39-C40 | -2.1(2)     |
| C37-C32-C33-C39 | 63.86(19)   | C32-C33-C39-C40 | 178.87(14)  |
| C38-C32-C33-C39 | -69.06(19)  | O4-C39-C40-C41  | -179.92(13) |
| C31-C32-C33-C39 | 177.61(15)  | C33-C39-C40-C41 | 0.7(2)      |
| C37-C32-C33-C34 | -115.26(13) | C44-O5-C41-C40  | 3.4(2)      |
| C38-C32-C33-C34 | 111.82(13)  | C44-O5-C41-C42  | -177.35(13) |
| C31-C32-C33-C34 | -1.51(14)   | C39-C40-C41-O5  | -179.89(13) |
| C39-C33-C34-C42 | 1.9(2)      | C39-C40-C41-C42 | 0.9(2)      |
| C32-C33-C34-C42 | -178.91(13) | C33-C34-C42-C41 | -0.2(2)     |
| C39-C33-C34-N2  | -178.12(12) | N2-C34-C42-C41  | 179.75(14)  |
| C32-C33-C34-N2  | 1.12(16)    | O5-C41-C42-C34  | 179.58(12)  |
| C31-N2-C34-C42  | 179.89(14)  | C40-C41-C42-C34 | -1.2(2)     |
| C31-N2-C34-C33  | -0.13(16)   | C49-C37-C45-C46 | -1.0(2)     |
| C33-C32-C37-C49 | -118.66(15) | C32-C37-C45-C46 | 179.35(14)  |
| C38-C32-C37-C49 | 13.36(19)   | C37-C45-C46-C47 | -0.5(2)     |
| C31-C32-C37-C49 | 132.04(14)  | C45-C46-C47-C48 | 0.6(2)      |
| C33-C32-C37-C45 | 60.93(16)   | C46-C47-C48-C49 | 0.8(2)      |
| C38-C32-C37-C45 | -167.05(13) | C45-C37-C49-C48 | 2.4(2)      |
| C31-C32-C37-C45 | -48.37(16)  | C32-C37-C49-C48 | -177.97(14) |
| C33-C32-C38-C54 | -2.36(19)   | C47-C48-C49-C37 | -2.4(2)     |
| C37-C32-C38-C54 | -133.21(14) | C54-C38-C50-C51 | 1.6(2)      |
| C31-C32-C38-C54 | 107.45(15)  | C32-C38-C50-C51 | 178.04(14)  |
| C33-C32-C38-C50 | -178.66(13) | C38-C50-C51-C52 | -1.5(3)     |
| C37-C32-C38-C50 | 50.48(18)   | C50-C51-C52-C53 | 0.0(3)      |
| C31-C32-C38-C50 | -68.85(16)  | C51-C52-C53-C54 | 1.4(3)      |
| C43-O4-C39-C33  | -175.30(13) | C52-C53-C54-C38 | -1.2(2)     |
| C43-O4-C39-C40  | 5.3(2)      | C50-C38-C54-C53 | -0.3(2)     |
| C34-C33-C39-O4  | 178.53(12)  | C32-C38-C54-C53 | -176.67(14) |

---

**Table S27.** Hydrogen bonds and close contacts for **3** [*P*-1] [Å and °].

| D-H...A      | d(D-H)    | d(H...A) | d(D...A)   | <(DHA)    |
|--------------|-----------|----------|------------|-----------|
| N1-H1...O3#1 | 0.89(2)   | 1.92(2)  | 2.7893(17) | 168.3(19) |
| N2-H2...O6#2 | 0.909(19) | 1.96(2)  | 2.8374(16) | 162.4(17) |

Symmetry transformations used to generate equivalent atoms:

#1 -x+1,-y+1,-z #2 -x+1,-y,-z+1

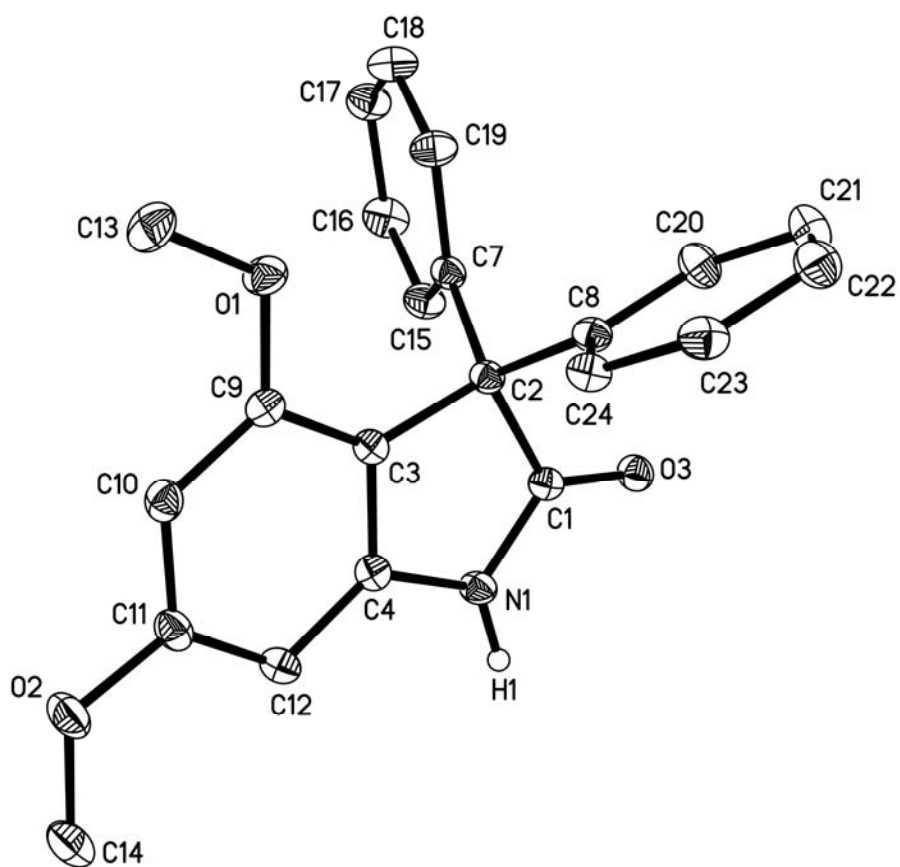

**Figure S55.** ORTEP diagram of **3** [ $P2_1/c$ ] with thermal ellipsoids drawn at 50% probability level. Hydrogen atoms were omitted for clarity, except for H1, to emphasize valency of the nitrogen atoms.

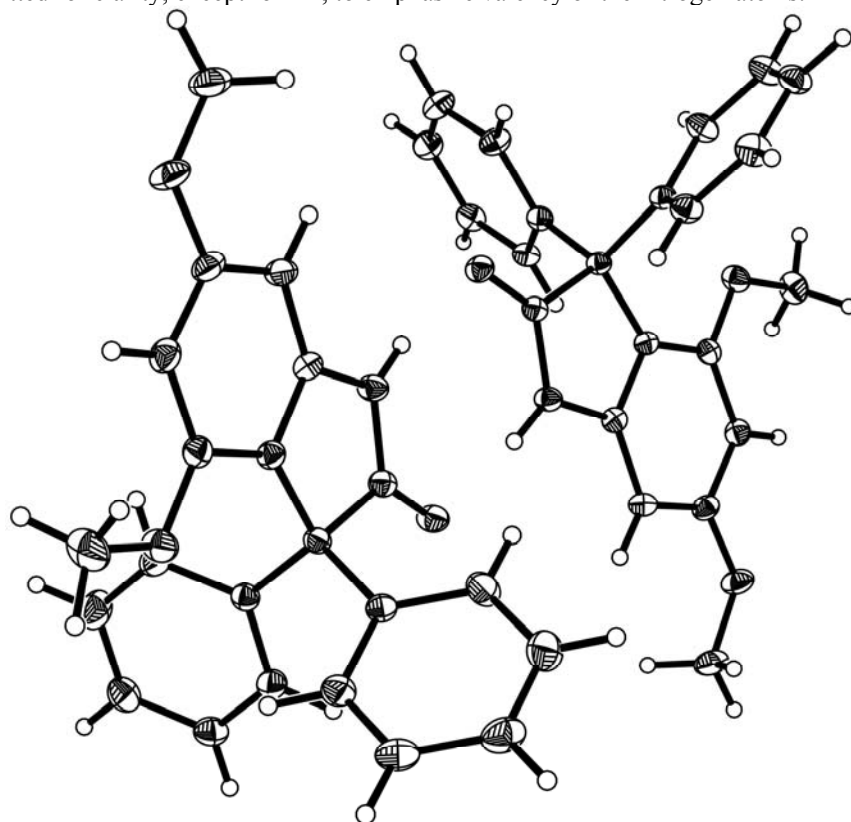

**Figure S56.** ORTEP diagram of asymmetric unit of **3** [ $P2_1/c$ ] with thermal ellipsoids drawn at 50% probability level.

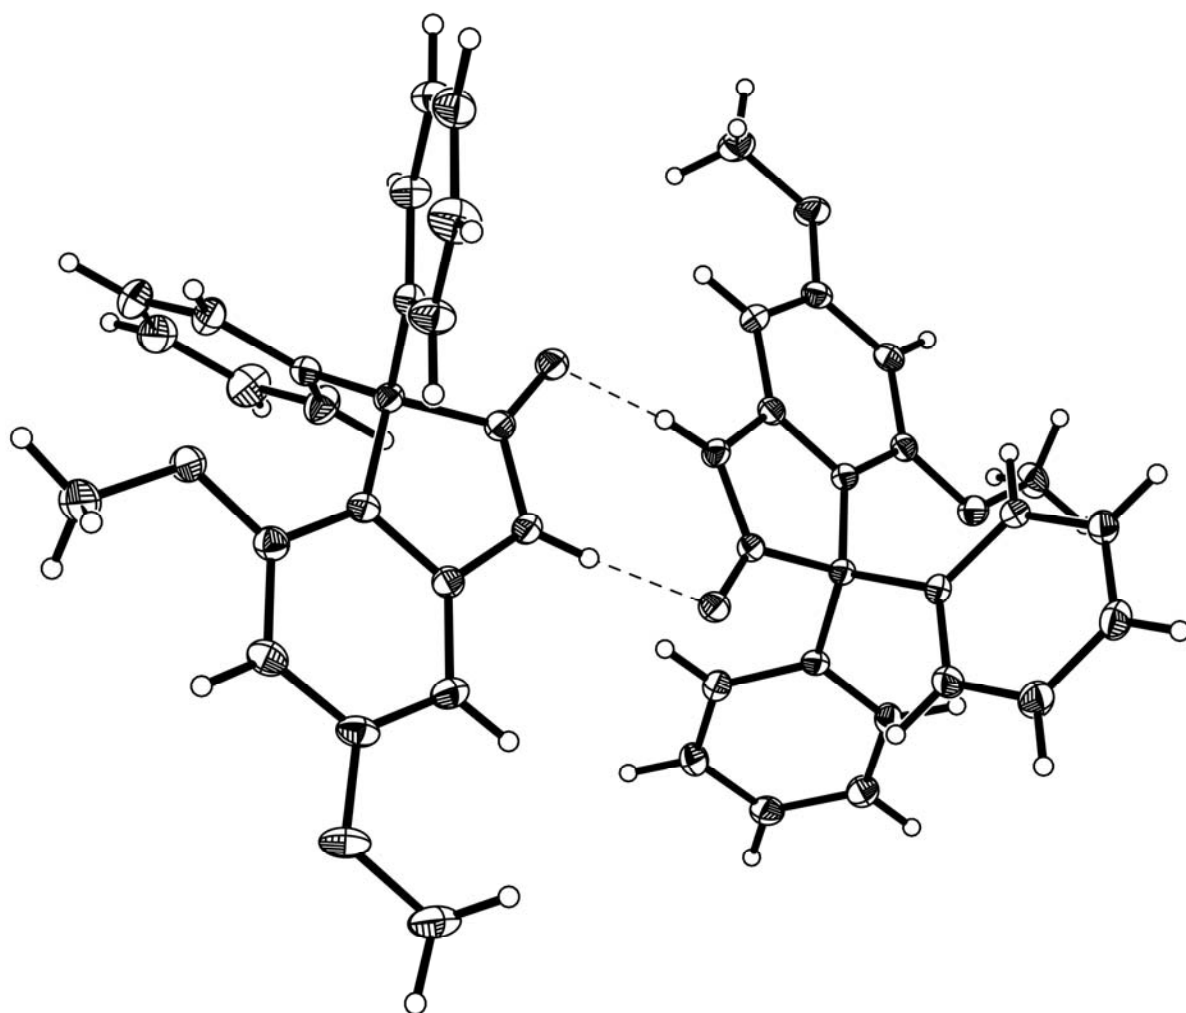

**Figure S57.** ORTEP diagram of **3** [ $P2_1/c$ ] showing intermolecular hydrogen bonding with thermal ellipsoids drawn at 50% probability level.



## Experimental Details for the Structure Determination of **3** [ $P2_1/c$ ].

### Data collection

A crystal (0.36 x 0.14 x 0.12 mm<sup>3</sup>) was placed onto the tip of a 0.1 mm diameter glass capillary tube or fiber and mounted on a Bruker SMART APEX II CCD Platform diffractometer for a data collection at 100.0(1) K.<sup>1</sup> A preliminary set of cell constants and an orientation matrix were calculated from reflections harvested from three orthogonal wedges of reciprocal space. The full data collection was carried out using MoK $\alpha$  radiation (graphite monochromator) with a frame time of 45 seconds and a detector distance of 3.99 cm. A randomly oriented region of reciprocal space was surveyed: five major sections of frames were collected with 0.50° steps in  $\omega$  at five different  $\phi$  settings and a detector position of -38° in  $2\theta$ . The intensity data were corrected for absorption.<sup>2</sup> Final cell constants were calculated from the xyz centroids of 4082 strong reflections from the actual data collection after integration.<sup>3</sup> See Table S28 for additional crystal and refinement information.

### Structure solution and refinement

The structure was solved using SIR97<sup>4</sup> and refined using SHELXL-97.<sup>5</sup> The space group  $P2_1/c$  was determined based on systematic absences. A direct-methods solution was calculated which provided most non-hydrogen atoms from the E-map. Full-matrix least squares / difference Fourier cycles were performed which located the remaining non-hydrogen atoms. All non-hydrogen atoms were refined with anisotropic displacement parameters. Amine hydrogen atoms H1 and H2 were found from the difference Fourier map, and their positional and isotropic displacement parameters were refined independently from those of all other atoms. All other hydrogen atoms were placed in ideal positions and refined as riding atoms with relative isotropic displacement parameters. The final full matrix least squares refinement converged to  $R1 = 0.0584$  ( $F^2$ ,  $I > 2\sigma(I)$ ) and  $wR2 = 0.1503$  ( $F^2$ , all data).

### Structure description

The structure is the one suggested. There are two independent molecules in the asymmetric unit with all atoms in general positions. Moderate hydrogen bonding links pairs of molecules (see Figure S57 and Table S34).

### References

- <sup>1</sup> APEX2, version 2011.4-1; Bruker AXS: Madison, WI, 2011.
- <sup>2</sup> Sheldrick, G. M. *SADABS*, version 2008/1; University of Göttingen: Göttingen, Germany, 2008.
- <sup>3</sup> SAINT, version 7.68A; Bruker AXS: Madison, WI, 2009.
- <sup>4</sup> Altomare, A.; Burla, M. C.; Camalli, M.; Cascarano, G. L.; Giacovazzo, C.; Guagliardi, A.; Moliterni, A. G. G.; Polidori, G.; Spagna, R. *SIR97: A new program for solving and refining crystal structures*; Istituto di Cristallografia, CNR: Bari, Italy, 1999.
- <sup>5</sup> Sheldrick, G. M. *Acta. Cryst.* **2008**, *A64*, 112-122.

### Some equations of interest:

$$\begin{aligned}R_{\text{int}} &= \Sigma |F_o^2 - \langle F_o^2 \rangle| / \Sigma |F_o^2| \\R1 &= \Sigma ||F_o| - |F_c|| / \Sigma |F_o| \\wR2 &= [\Sigma [w(F_o^2 - F_c^2)^2] / \Sigma [w(F_o^2)^2]]^{1/2} \\ \text{where } w &= 1 / [\sigma^2(F_o^2) + (aP)^2 + bP] \text{ and} \\ P &= 1/3 \max(0, F_o^2) + 2/3 F_c^2 \\ \text{Goof} = S &= [\Sigma [w(F_o^2 - F_c^2)^2] / (m-n)]^{1/2} \\ \text{where } m &= \text{number of reflections and } n = \text{number of parameters}\end{aligned}$$

**Table S28.** Crystal data and structure refinement for **3** [ $P2_1/c$ ].

|                                             |                                                                    |                           |
|---------------------------------------------|--------------------------------------------------------------------|---------------------------|
| Identification code                         | <b>3</b> , JONJK60                                                 |                           |
| Empirical formula                           | C <sub>22</sub> H <sub>19</sub> N O <sub>3</sub>                   |                           |
| Formula weight                              | 345.38                                                             |                           |
| Temperature                                 | 100.0(1) K                                                         |                           |
| Wavelength                                  | 0.71073 Å                                                          |                           |
| Crystal system                              | Monoclinic                                                         |                           |
| Space group                                 | $P2_1/c$                                                           |                           |
| Unit cell dimensions                        | $a = 13.3622(17)$ Å                                                | $\alpha = 90^\circ$       |
|                                             | $b = 30.607(4)$ Å                                                  | $\beta = 92.242(3)^\circ$ |
|                                             | $c = 8.5678(11)$ Å                                                 | $\gamma = 90^\circ$       |
| Volume                                      | 3501.4(8) Å <sup>3</sup>                                           |                           |
| <i>Z</i>                                    | 8                                                                  |                           |
| Density (calculated)                        | 1.310 Mg/m <sup>3</sup>                                            |                           |
| Absorption coefficient                      | 0.087 mm <sup>-1</sup>                                             |                           |
| <i>F</i> (000)                              | 1456                                                               |                           |
| Crystal color, morphology                   | colorless, rod                                                     |                           |
| Crystal size                                | 0.36 x 0.14 x 0.12 mm <sup>3</sup>                                 |                           |
| Theta range for data collection             | 1.53 to 36.32°                                                     |                           |
| Index ranges                                | $-22 \leq h \leq 22$ , $-50 \leq k \leq 51$ , $-14 \leq l \leq 14$ |                           |
| Reflections collected                       | 83564                                                              |                           |
| Independent reflections                     | 16949 [ $R(\text{int}) = 0.0920$ ]                                 |                           |
| Observed reflections                        | 9386                                                               |                           |
| Completeness to theta = 36.32°              | 99.9%                                                              |                           |
| Absorption correction                       | Multi-scan                                                         |                           |
| Max. and min. transmission                  | 0.9896 and 0.9693                                                  |                           |
| Refinement method                           | Full-matrix least-squares on $F^2$                                 |                           |
| Data / restraints / parameters              | 16949 / 0 / 481                                                    |                           |
| Goodness-of-fit on $F^2$                    | 0.931                                                              |                           |
| Final <i>R</i> indices [ $I > 2\sigma(I)$ ] | $R1 = 0.0584$ , $wR2 = 0.1282$                                     |                           |
| <i>R</i> indices (all data)                 | $R1 = 0.1191$ , $wR2 = 0.1503$                                     |                           |
| Largest diff. peak and hole                 | 0.646 and -0.281 e.Å <sup>-3</sup>                                 |                           |

**Table S29.** Atomic coordinates ( $\times 10^4$ ) and equivalent isotropic displacement parameters ( $\text{\AA}^2 \times 10^3$ ) for **3** [ $P2_1/c$ ].  $U_{\text{eq}}$  is defined as one third of the trace of the orthogonalized  $U_{ij}$  tensor.

|     | x        | y       | z        | $U_{\text{eq}}$ |
|-----|----------|---------|----------|-----------------|
| O1  | 3709(1)  | 5888(1) | 9192(1)  | 19(1)           |
| O2  | 5062(1)  | 4557(1) | 7340(1)  | 22(1)           |
| O3  | 6847(1)  | 6722(1) | 6438(1)  | 17(1)           |
| N1  | 6596(1)  | 5981(1) | 6398(1)  | 15(1)           |
| C1  | 6370(1)  | 6396(1) | 6790(1)  | 14(1)           |
| C2  | 5403(1)  | 6392(1) | 7748(1)  | 13(1)           |
| C3  | 5168(1)  | 5906(1) | 7744(1)  | 14(1)           |
| C4  | 5896(1)  | 5683(1) | 6951(1)  | 14(1)           |
| C7  | 4588(1)  | 6660(1) | 6880(1)  | 14(1)           |
| C8  | 5703(1)  | 6578(1) | 9357(1)  | 15(1)           |
| C9  | 4405(1)  | 5661(1) | 8397(1)  | 15(1)           |
| C10 | 4395(1)  | 5209(1) | 8217(1)  | 16(1)           |
| C11 | 5143(1)  | 5000(1) | 7402(1)  | 17(1)           |
| C12 | 5916(1)  | 5234(1) | 6738(1)  | 17(1)           |
| C13 | 2945(1)  | 5641(1) | 9920(2)  | 22(1)           |
| C14 | 5770(1)  | 4325(1) | 6451(2)  | 24(1)           |
| C15 | 4606(1)  | 6715(1) | 5273(1)  | 19(1)           |
| C16 | 3840(1)  | 6933(1) | 4452(2)  | 22(1)           |
| C17 | 3040(1)  | 7102(1) | 5244(2)  | 22(1)           |
| C18 | 3030(1)  | 7059(1) | 6851(2)  | 23(1)           |
| C19 | 3797(1)  | 6842(1) | 7668(2)  | 19(1)           |
| C20 | 5899(1)  | 7024(1) | 9514(2)  | 20(1)           |
| C21 | 6243(1)  | 7197(1) | 10933(2) | 22(1)           |
| C22 | 6395(1)  | 6924(1) | 12220(2) | 22(1)           |
| C23 | 6196(1)  | 6482(1) | 12073(2) | 19(1)           |
| C24 | 5849(1)  | 6307(1) | 10654(1) | 16(1)           |
| O4  | 11190(1) | 6601(1) | 1336(1)  | 22(1)           |
| O5  | 9780(1)  | 7972(1) | 2709(1)  | 27(1)           |
| O6  | 8366(1)  | 5823(1) | 4846(1)  | 19(1)           |
| N2  | 8514(1)  | 6564(1) | 4541(1)  | 17(1)           |
| C31 | 8775(1)  | 6145(1) | 4294(1)  | 15(1)           |
| C32 | 9674(1)  | 6134(1) | 3194(1)  | 14(1)           |
| C33 | 9817(1)  | 6620(1) | 2932(1)  | 15(1)           |

|     |          |         |          |       |
|-----|----------|---------|----------|-------|
| C34 | 9116(1)  | 6856(1) | 3733(1)  | 16(1) |
| C37 | 10551(1) | 5915(1) | 4098(1)  | 16(1) |
| C38 | 9372(1)  | 5897(1) | 1670(1)  | 15(1) |
| C39 | 10509(1) | 6849(1) | 2078(2)  | 17(1) |
| C40 | 10467(1) | 7304(1) | 2031(2)  | 20(1) |
| C41 | 9739(1)  | 7528(1) | 2843(2)  | 20(1) |
| C42 | 9042(1)  | 7308(1) | 3718(2)  | 19(1) |
| C43 | 11829(1) | 6816(1) | 298(2)   | 31(1) |
| C44 | 9059(1)  | 8223(1) | 3522(2)  | 28(1) |
| C45 | 11265(1) | 6161(1) | 4925(2)  | 23(1) |
| C46 | 12047(1) | 5958(1) | 5765(2)  | 28(1) |
| C47 | 12112(1) | 5507(1) | 5791(2)  | 24(1) |
| C48 | 11395(1) | 5258(1) | 4992(2)  | 22(1) |
| C49 | 10620(1) | 5462(1) | 4150(2)  | 20(1) |
| C50 | 10100(1) | 5744(1) | 683(2)   | 21(1) |
| C51 | 9836(1)  | 5550(1) | -736(2)  | 26(1) |
| C52 | 8839(1)  | 5500(1) | -1195(2) | 28(1) |
| C53 | 8110(1)  | 5650(1) | -227(2)  | 29(1) |
| C54 | 8373(1)  | 5847(1) | 1195(2)  | 23(1) |

---

**Table S30.** Bond lengths [Å] and angles [°] for **3** [ $P2_1/c$ ].

|              |            |             |            |
|--------------|------------|-------------|------------|
| O(1)-C(9)    | 1.3637(14) | C(17)-H(17) | 0.9500     |
| O(1)-C(13)   | 1.4333(15) | C(18)-C(19) | 1.3886(18) |
| O(2)-C(11)   | 1.3606(14) | C(18)-H(18) | 0.9500     |
| O(2)-C(14)   | 1.4259(16) | C(19)-H(19) | 0.9500     |
| O(3)-C(1)    | 1.2274(14) | C(20)-C(21) | 1.3884(18) |
| N(1)-C(1)    | 1.3506(15) | C(20)-H(20) | 0.9500     |
| N(1)-C(4)    | 1.4007(15) | C(21)-C(22) | 1.3911(19) |
| N(1)-H(1)    | 0.913(19)  | C(21)-H(21) | 0.9500     |
| C(1)-C(2)    | 1.5573(16) | C(22)-C(23) | 1.3838(18) |
| C(2)-C(3)    | 1.5201(16) | C(22)-H(22) | 0.9500     |
| C(2)-C(8)    | 1.5303(16) | C(23)-C(24) | 1.3914(17) |
| C(2)-C(7)    | 1.5322(16) | C(23)-H(23) | 0.9500     |
| C(3)-C(4)    | 1.3885(16) | C(24)-H(24) | 0.9500     |
| C(3)-C(9)    | 1.4004(16) | O(4)-C(39)  | 1.3610(15) |
| C(4)-C(12)   | 1.3878(16) | O(4)-C(43)  | 1.4192(16) |
| C(7)-C(15)   | 1.3879(17) | O(5)-C(41)  | 1.3636(15) |
| C(7)-C(19)   | 1.3919(16) | O(5)-C(44)  | 1.4347(18) |
| C(8)-C(24)   | 1.3943(16) | O(6)-C(31)  | 1.2296(14) |
| C(8)-C(20)   | 1.3946(17) | N(2)-C(31)  | 1.3497(15) |
| C(9)-C(10)   | 1.3915(16) | N(2)-C(34)  | 1.4025(16) |
| C(10)-C(11)  | 1.3982(17) | N(2)-H(2)   | 0.898(17)  |
| C(10)-H(10)  | 0.9500     | C(31)-C(32) | 1.5552(16) |
| C(11)-C(12)  | 1.3955(17) | C(32)-C(33) | 1.5154(16) |
| C(12)-H(12)  | 0.9500     | C(32)-C(37) | 1.5332(17) |
| C(13)-H(13A) | 0.9800     | C(32)-C(38) | 1.5341(17) |
| C(13)-H(13B) | 0.9800     | C(33)-C(34) | 1.3856(17) |
| C(13)-H(13C) | 0.9800     | C(33)-C(39) | 1.3916(17) |
| C(14)-H(14A) | 0.9800     | C(34)-C(42) | 1.3863(16) |
| C(14)-H(14B) | 0.9800     | C(37)-C(45) | 1.3880(18) |
| C(14)-H(14C) | 0.9800     | C(37)-C(49) | 1.3917(17) |
| C(15)-C(16)  | 1.3895(18) | C(38)-C(54) | 1.3889(18) |
| C(15)-H(15)  | 0.9500     | C(38)-C(50) | 1.3953(17) |
| C(16)-C(17)  | 1.3886(19) | C(39)-C(40) | 1.3943(17) |
| C(16)-H(16)  | 0.9500     | C(40)-C(41) | 1.3988(18) |
| C(17)-C(18)  | 1.3835(19) | C(40)-H(40) | 0.9500     |

|                  |            |                     |            |
|------------------|------------|---------------------|------------|
| C(41)-C(42)      | 1.3927(18) | C(3)-C(2)-C(1)      | 100.43(9)  |
| C(42)-H(42)      | 0.9500     | C(8)-C(2)-C(1)      | 106.16(9)  |
| C(43)-H(43A)     | 0.9800     | C(7)-C(2)-C(1)      | 109.23(9)  |
| C(43)-H(43B)     | 0.9800     | C(4)-C(3)-C(9)      | 117.86(10) |
| C(43)-H(43C)     | 0.9800     | C(4)-C(3)-C(2)      | 109.52(10) |
| C(44)-H(44A)     | 0.9800     | C(9)-C(3)-C(2)      | 132.61(10) |
| C(44)-H(44B)     | 0.9800     | C(12)-C(4)-C(3)     | 124.68(11) |
| C(44)-H(44C)     | 0.9800     | C(12)-C(4)-N(1)     | 125.78(11) |
| C(45)-C(46)      | 1.3914(19) | C(3)-C(4)-N(1)      | 109.54(10) |
| C(45)-H(45)      | 0.9500     | C(15)-C(7)-C(19)    | 118.41(11) |
| C(46)-C(47)      | 1.384(2)   | C(15)-C(7)-C(2)     | 120.42(10) |
| C(46)-H(46)      | 0.9500     | C(19)-C(7)-C(2)     | 121.13(10) |
| C(47)-C(48)      | 1.3846(19) | C(24)-C(8)-C(20)    | 119.02(11) |
| C(47)-H(47)      | 0.9500     | C(24)-C(8)-C(2)     | 121.40(10) |
| C(48)-C(49)      | 1.3859(18) | C(20)-C(8)-C(2)     | 119.45(10) |
| C(48)-H(48)      | 0.9500     | O(1)-C(9)-C(10)     | 123.92(11) |
| C(49)-H(49)      | 0.9500     | O(1)-C(9)-C(3)      | 116.60(10) |
| C(50)-C(51)      | 1.3861(19) | C(10)-C(9)-C(3)     | 119.47(11) |
| C(50)-H(50)      | 0.9500     | C(9)-C(10)-C(11)    | 120.54(11) |
| C(51)-C(52)      | 1.383(2)   | C(9)-C(10)-H(10)    | 119.7      |
| C(51)-H(51)      | 0.9500     | C(11)-C(10)-H(10)   | 119.7      |
| C(52)-C(53)      | 1.382(2)   | O(2)-C(11)-C(12)    | 123.67(11) |
| C(52)-H(52)      | 0.9500     | O(2)-C(11)-C(10)    | 114.83(11) |
| C(53)-C(54)      | 1.3924(19) | C(12)-C(11)-C(10)   | 121.49(11) |
| C(53)-H(53)      | 0.9500     | C(4)-C(12)-C(11)    | 115.96(11) |
| C(54)-H(54)      | 0.9500     | C(4)-C(12)-H(12)    | 122.0      |
| C(9)-O(1)-C(13)  | 117.31(10) | C(11)-C(12)-H(12)   | 122.0      |
| C(11)-O(2)-C(14) | 117.54(10) | O(1)-C(13)-H(13A)   | 109.5      |
| C(1)-N(1)-C(4)   | 111.69(10) | O(1)-C(13)-H(13B)   | 109.5      |
| C(1)-N(1)-H(1)   | 124.1(11)  | H(13A)-C(13)-H(13B) | 109.5      |
| C(4)-N(1)-H(1)   | 124.1(11)  | O(1)-C(13)-H(13C)   | 109.5      |
| O(3)-C(1)-N(1)   | 125.46(11) | H(13A)-C(13)-H(13C) | 109.5      |
| O(3)-C(1)-C(2)   | 125.73(10) | H(13B)-C(13)-H(13C) | 109.5      |
| N(1)-C(1)-C(2)   | 108.81(10) | O(2)-C(14)-H(14A)   | 109.5      |
| C(3)-C(2)-C(8)   | 114.33(9)  | O(2)-C(14)-H(14B)   | 109.5      |
| C(3)-C(2)-C(7)   | 112.36(9)  | H(14A)-C(14)-H(14B) | 109.5      |
| C(8)-C(2)-C(7)   | 113.22(9)  | O(2)-C(14)-H(14C)   | 109.5      |

|                     |            |                     |            |
|---------------------|------------|---------------------|------------|
| H(14A)-C(14)-H(14C) | 109.5      | O(6)-C(31)-N(2)     | 125.39(11) |
| H(14B)-C(14)-H(14C) | 109.5      | O(6)-C(31)-C(32)    | 125.66(10) |
| C(7)-C(15)-C(16)    | 121.28(12) | N(2)-C(31)-C(32)    | 108.95(10) |
| C(7)-C(15)-H(15)    | 119.4      | C(33)-C(32)-C(37)   | 113.92(10) |
| C(16)-C(15)-H(15)   | 119.4      | C(33)-C(32)-C(38)   | 111.59(10) |
| C(17)-C(16)-C(15)   | 119.85(12) | C(37)-C(32)-C(38)   | 113.13(9)  |
| C(17)-C(16)-H(16)   | 120.1      | C(33)-C(32)-C(31)   | 100.06(9)  |
| C(15)-C(16)-H(16)   | 120.1      | C(37)-C(32)-C(31)   | 107.21(9)  |
| C(18)-C(17)-C(16)   | 119.22(12) | C(38)-C(32)-C(31)   | 110.00(9)  |
| C(18)-C(17)-H(17)   | 120.4      | C(34)-C(33)-C(39)   | 118.27(11) |
| C(16)-C(17)-H(17)   | 120.4      | C(34)-C(33)-C(32)   | 110.28(10) |
| C(17)-C(18)-C(19)   | 120.78(12) | C(39)-C(33)-C(32)   | 131.45(11) |
| C(17)-C(18)-H(18)   | 119.6      | C(33)-C(34)-C(42)   | 124.41(11) |
| C(19)-C(18)-H(18)   | 119.6      | C(33)-C(34)-N(2)    | 108.90(10) |
| C(18)-C(19)-C(7)    | 120.42(12) | C(42)-C(34)-N(2)    | 126.69(11) |
| C(18)-C(19)-H(19)   | 119.8      | C(45)-C(37)-C(49)   | 118.71(11) |
| C(7)-C(19)-H(19)    | 119.8      | C(45)-C(37)-C(32)   | 121.15(11) |
| C(21)-C(20)-C(8)    | 120.80(12) | C(49)-C(37)-C(32)   | 120.09(11) |
| C(21)-C(20)-H(20)   | 119.6      | C(54)-C(38)-C(50)   | 118.03(11) |
| C(8)-C(20)-H(20)    | 119.6      | C(54)-C(38)-C(32)   | 121.29(11) |
| C(20)-C(21)-C(22)   | 119.89(12) | C(50)-C(38)-C(32)   | 120.62(11) |
| C(20)-C(21)-H(21)   | 120.1      | O(4)-C(39)-C(33)    | 115.82(10) |
| C(22)-C(21)-H(21)   | 120.1      | O(4)-C(39)-C(40)    | 124.72(11) |
| C(23)-C(22)-C(21)   | 119.56(12) | C(33)-C(39)-C(40)   | 119.46(11) |
| C(23)-C(22)-H(22)   | 120.2      | C(39)-C(40)-C(41)   | 120.27(12) |
| C(21)-C(22)-H(22)   | 120.2      | C(39)-C(40)-H(40)   | 119.9      |
| C(22)-C(23)-C(24)   | 120.77(12) | C(41)-C(40)-H(40)   | 119.9      |
| C(22)-C(23)-H(23)   | 119.6      | O(5)-C(41)-C(42)    | 123.90(12) |
| C(24)-C(23)-H(23)   | 119.6      | O(5)-C(41)-C(40)    | 114.60(11) |
| C(23)-C(24)-C(8)    | 119.96(11) | C(42)-C(41)-C(40)   | 121.50(11) |
| C(23)-C(24)-H(24)   | 120.0      | C(34)-C(42)-C(41)   | 116.09(11) |
| C(8)-C(24)-H(24)    | 120.0      | C(34)-C(42)-H(42)   | 122.0      |
| C(39)-O(4)-C(43)    | 117.59(10) | C(41)-C(42)-H(42)   | 122.0      |
| C(41)-O(5)-C(44)    | 117.63(11) | O(4)-C(43)-H(43A)   | 109.5      |
| C(31)-N(2)-C(34)    | 111.80(10) | O(4)-C(43)-H(43B)   | 109.5      |
| C(31)-N(2)-H(2)     | 122.7(11)  | H(43A)-C(43)-H(43B) | 109.5      |
| C(34)-N(2)-H(2)     | 125.4(11)  | O(4)-C(43)-H(43C)   | 109.5      |

|                     |            |                   |            |
|---------------------|------------|-------------------|------------|
| H(43A)-C(43)-H(43C) | 109.5      | C(49)-C(48)-H(48) | 120.1      |
| H(43B)-C(43)-H(43C) | 109.5      | C(48)-C(49)-C(37) | 120.83(12) |
| O(5)-C(44)-H(44A)   | 109.5      | C(48)-C(49)-H(49) | 119.6      |
| O(5)-C(44)-H(44B)   | 109.5      | C(37)-C(49)-H(49) | 119.6      |
| H(44A)-C(44)-H(44B) | 109.5      | C(51)-C(50)-C(38) | 121.10(12) |
| O(5)-C(44)-H(44C)   | 109.5      | C(51)-C(50)-H(50) | 119.4      |
| H(44A)-C(44)-H(44C) | 109.5      | C(38)-C(50)-H(50) | 119.4      |
| H(44B)-C(44)-H(44C) | 109.5      | C(52)-C(51)-C(50) | 120.34(13) |
| C(37)-C(45)-C(46)   | 120.70(12) | C(52)-C(51)-H(51) | 119.8      |
| C(37)-C(45)-H(45)   | 119.6      | C(50)-C(51)-H(51) | 119.8      |
| C(46)-C(45)-H(45)   | 119.6      | C(53)-C(52)-C(51) | 119.19(13) |
| C(47)-C(46)-C(45)   | 119.86(13) | C(53)-C(52)-H(52) | 120.4      |
| C(47)-C(46)-H(46)   | 120.1      | C(51)-C(52)-H(52) | 120.4      |
| C(45)-C(46)-H(46)   | 120.1      | C(52)-C(53)-C(54) | 120.55(13) |
| C(46)-C(47)-C(48)   | 120.01(12) | C(52)-C(53)-H(53) | 119.7      |
| C(46)-C(47)-H(47)   | 120.0      | C(54)-C(53)-H(53) | 119.7      |
| C(48)-C(47)-H(47)   | 120.0      | C(38)-C(54)-C(53) | 120.78(12) |
| C(47)-C(48)-C(49)   | 119.88(12) | C(38)-C(54)-H(54) | 119.6      |
| C(47)-C(48)-H(48)   | 120.1      | C(53)-C(54)-H(54) | 119.6      |

---



**Table S31.** Anisotropic displacement parameters ( $\text{\AA}^2 \times 10^3$ ) for **3** [ $P2_1/c$ ]. The anisotropic displacement factor exponent takes the form:  $-2\pi^2 [h^2 a^{*2} U_{11} + \dots + 2 h k a^* b^* U_{12}]$

|     | $U_{11}$ | $U_{22}$ | $U_{33}$ | $U_{23}$ | $U_{13}$ | $U_{12}$ |
|-----|----------|----------|----------|----------|----------|----------|
| O1  | 16(1)    | 19(1)    | 22(1)    | 2(1)     | 6(1)     | 0(1)     |
| O2  | 28(1)    | 12(1)    | 28(1)    | 0(1)     | 4(1)     | -2(1)    |
| O3  | 18(1)    | 14(1)    | 18(1)    | 1(1)     | 4(1)     | -2(1)    |
| N1  | 16(1)    | 14(1)    | 17(1)    | 0(1)     | 5(1)     | 0(1)     |
| C1  | 15(1)    | 14(1)    | 12(1)    | 0(1)     | 0(1)     | 1(1)     |
| C2  | 14(1)    | 12(1)    | 13(1)    | 0(1)     | 2(1)     | 0(1)     |
| C3  | 15(1)    | 13(1)    | 13(1)    | 0(1)     | 0(1)     | 0(1)     |
| C4  | 16(1)    | 14(1)    | 13(1)    | 1(1)     | 0(1)     | 0(1)     |
| C7  | 16(1)    | 11(1)    | 15(1)    | 1(1)     | 2(1)     | 0(1)     |
| C8  | 15(1)    | 16(1)    | 13(1)    | 0(1)     | 3(1)     | 1(1)     |
| C9  | 14(1)    | 17(1)    | 13(1)    | 2(1)     | 0(1)     | 1(1)     |
| C10 | 17(1)    | 15(1)    | 18(1)    | 3(1)     | 1(1)     | -2(1)    |
| C11 | 21(1)    | 13(1)    | 16(1)    | 1(1)     | -2(1)    | 0(1)     |
| C12 | 19(1)    | 15(1)    | 17(1)    | -1(1)    | 2(1)     | 2(1)     |
| C13 | 18(1)    | 26(1)    | 23(1)    | 5(1)     | 6(1)     | -3(1)    |
| C14 | 32(1)    | 15(1)    | 27(1)    | -4(1)    | 0(1)     | 2(1)     |
| C15 | 22(1)    | 20(1)    | 16(1)    | -1(1)    | 2(1)     | 3(1)     |
| C16 | 29(1)    | 25(1)    | 14(1)    | 1(1)     | -1(1)    | 5(1)     |
| C17 | 23(1)    | 20(1)    | 22(1)    | 2(1)     | -2(1)    | 6(1)     |
| C18 | 22(1)    | 24(1)    | 22(1)    | 2(1)     | 4(1)     | 8(1)     |
| C19 | 20(1)    | 22(1)    | 16(1)    | 2(1)     | 4(1)     | 5(1)     |
| C20 | 26(1)    | 16(1)    | 17(1)    | 0(1)     | 1(1)     | -1(1)    |
| C21 | 29(1)    | 18(1)    | 21(1)    | -4(1)    | 2(1)     | -4(1)    |
| C22 | 24(1)    | 24(1)    | 16(1)    | -4(1)    | 1(1)     | 1(1)     |
| C23 | 21(1)    | 22(1)    | 15(1)    | 0(1)     | 1(1)     | 4(1)     |
| C24 | 18(1)    | 16(1)    | 16(1)    | 0(1)     | 2(1)     | 3(1)     |
| O4  | 21(1)    | 17(1)    | 28(1)    | 4(1)     | 11(1)    | 0(1)     |
| O5  | 33(1)    | 11(1)    | 36(1)    | 0(1)     | -1(1)    | -1(1)    |
| O6  | 20(1)    | 15(1)    | 22(1)    | 2(1)     | 7(1)     | 1(1)     |
| N2  | 18(1)    | 15(1)    | 17(1)    | 0(1)     | 5(1)     | 1(1)     |
| C31 | 16(1)    | 15(1)    | 15(1)    | -1(1)    | 0(1)     | 1(1)     |
| C32 | 14(1)    | 13(1)    | 16(1)    | 0(1)     | 2(1)     | 1(1)     |
| C33 | 16(1)    | 13(1)    | 16(1)    | 0(1)     | 0(1)     | 0(1)     |

|     |       |       |       |       |        |       |
|-----|-------|-------|-------|-------|--------|-------|
| C34 | 18(1) | 14(1) | 15(1) | -1(1) | 0(1)   | -1(1) |
| C37 | 16(1) | 16(1) | 15(1) | 0(1)  | 2(1)   | 0(1)  |
| C38 | 18(1) | 13(1) | 15(1) | 1(1)  | 1(1)   | 1(1)  |
| C39 | 16(1) | 16(1) | 19(1) | 1(1)  | 1(1)   | -1(1) |
| C40 | 20(1) | 16(1) | 23(1) | 3(1)  | -1(1)  | -3(1) |
| C41 | 24(1) | 12(1) | 22(1) | 0(1)  | -5(1)  | -1(1) |
| C42 | 21(1) | 14(1) | 21(1) | -2(1) | 0(1)   | 2(1)  |
| C43 | 26(1) | 26(1) | 43(1) | 10(1) | 18(1)  | 0(1)  |
| C44 | 35(1) | 15(1) | 33(1) | -3(1) | -8(1)  | 5(1)  |
| C45 | 25(1) | 17(1) | 26(1) | 0(1)  | -6(1)  | 0(1)  |
| C46 | 27(1) | 27(1) | 30(1) | -1(1) | -11(1) | -3(1) |
| C47 | 21(1) | 28(1) | 22(1) | 3(1)  | -3(1)  | 4(1)  |
| C48 | 24(1) | 17(1) | 25(1) | 1(1)  | 0(1)   | 4(1)  |
| C49 | 19(1) | 16(1) | 24(1) | 0(1)  | -2(1)  | 1(1)  |
| C50 | 20(1) | 21(1) | 21(1) | -3(1) | 4(1)   | 1(1)  |
| C51 | 32(1) | 25(1) | 21(1) | -5(1) | 5(1)   | 4(1)  |
| C52 | 38(1) | 26(1) | 18(1) | -5(1) | -4(1)  | 4(1)  |
| C53 | 25(1) | 35(1) | 26(1) | -6(1) | -8(1)  | 4(1)  |
| C54 | 19(1) | 29(1) | 21(1) | -4(1) | -1(1)  | 5(1)  |

---

**Table S32.** Hydrogen coordinates ( $\times 10^4$ ) and isotropic displacement parameters ( $\text{\AA}^2 \times 10^3$ ) for **3** [ $P2_1/c$ ].

|      | x        | y       | z        | $U_{\text{(eq)}}$ |
|------|----------|---------|----------|-------------------|
| H1   | 7159(14) | 5902(6) | 5900(20) | 40(5)             |
| H10  | 3875     | 5042    | 8651     | 20                |
| H12  | 6423     | 5094    | 6175     | 20                |
| H13A | 2567     | 5833    | 10596    | 33                |
| H13B | 3255     | 5406    | 10546    | 33                |
| H13C | 2491     | 5515    | 9114     | 33                |
| H14A | 5671     | 4010    | 6580     | 37                |
| H14B | 6451     | 4404    | 6818     | 37                |
| H14C | 5676     | 4403    | 5345     | 37                |
| H15  | 5153     | 6602    | 4724     | 23                |
| H16  | 3863     | 6966    | 3352     | 27                |
| H17  | 2505     | 7246    | 4689     | 26                |
| H18  | 2493     | 7180    | 7402     | 27                |
| H19  | 3781     | 6816    | 8772     | 23                |
| H20  | 5796     | 7211    | 8638     | 23                |
| H21  | 6375     | 7501    | 11026    | 27                |
| H22  | 6634     | 7041    | 13192    | 26                |
| H23  | 6298     | 6296    | 12952    | 23                |
| H24  | 5712     | 6003    | 10569    | 20                |
| H2   | 8030(13) | 6640(5) | 5190(20) | 30(4)             |
| H40  | 10936    | 7462    | 1445     | 24                |
| H42  | 8545     | 7458    | 4271     | 23                |
| H43A | 12200    | 6599    | -287     | 47                |
| H43B | 12302    | 7002    | 897      | 47                |
| H43C | 11426    | 6997    | -432     | 47                |
| H44A | 9168     | 8535    | 3328     | 42                |
| H44B | 9135     | 8165    | 4645     | 42                |
| H44C | 8382     | 8142    | 3148     | 42                |
| H45  | 11219    | 6471    | 4918     | 27                |
| H46  | 12536    | 6130    | 6320     | 34                |
| H47  | 12648    | 5369    | 6358     | 28                |
| H48  | 11434    | 4948    | 5020     | 26                |
| H49  | 10131    | 5289    | 3601     | 24                |

|     |       |      |       |    |
|-----|-------|------|-------|----|
| H50 | 10788 | 5772 | 989   | 25 |
| H51 | 10344 | 5450 | -1397 | 31 |
| H52 | 8657  | 5366 | -2164 | 33 |
| H53 | 7423  | 5618 | -534  | 35 |
| H54 | 7864  | 5949 | 1847  | 28 |

---

**Table S33.** Torsion angles [°] for **3** [ $P2_1/c$ ].

|               |             |                 |             |
|---------------|-------------|-----------------|-------------|
| C4-N1-C1-O3   | -178.92(11) | C2-C3-C9-O1     | 0.83(19)    |
| C4-N1-C1-C2   | 0.59(13)    | C4-C3-C9-C10    | -0.74(17)   |
| O3-C1-C2-C3   | 178.46(11)  | C2-C3-C9-C10    | -178.84(12) |
| N1-C1-C2-C3   | -1.05(12)   | O1-C9-C10-C11   | -179.14(11) |
| O3-C1-C2-C8   | -62.24(14)  | C3-C9-C10-C11   | 0.50(18)    |
| N1-C1-C2-C8   | 118.26(10)  | C14-O2-C11-C12  | -4.56(18)   |
| O3-C1-C2-C7   | 60.17(15)   | C14-O2-C11-C10  | 176.54(11)  |
| N1-C1-C2-C7   | -119.33(10) | C9-C10-C11-O2   | 178.49(11)  |
| C8-C2-C3-C4   | -112.02(11) | C9-C10-C11-C12  | -0.43(19)   |
| C7-C2-C3-C4   | 117.14(11)  | C3-C4-C12-C11   | -0.88(18)   |
| C1-C2-C3-C4   | 1.17(12)    | N1-C4-C12-C11   | 179.60(11)  |
| C8-C2-C3-C9   | 66.20(16)   | O2-C11-C12-C4   | -178.25(11) |
| C7-C2-C3-C9   | -64.64(16)  | C10-C11-C12-C4  | 0.58(18)    |
| C1-C2-C3-C9   | 179.39(12)  | C19-C7-C15-C16  | -2.02(19)   |
| C9-C3-C4-C12  | 0.97(18)    | C2-C7-C15-C16   | 175.74(12)  |
| C2-C3-C4-C12  | 179.49(11)  | C7-C15-C16-C17  | 0.4(2)      |
| C9-C3-C4-N1   | -179.44(10) | C15-C16-C17-C18 | 1.4(2)      |
| C2-C3-C4-N1   | -0.92(13)   | C16-C17-C18-C19 | -1.5(2)     |
| C1-N1-C4-C12  | 179.78(12)  | C17-C18-C19-C7  | -0.2(2)     |
| C1-N1-C4-C3   | 0.20(14)    | C15-C7-C19-C18  | 1.96(19)    |
| C3-C2-C7-C15  | -85.31(13)  | C2-C7-C19-C18   | -175.78(12) |
| C8-C2-C7-C15  | 143.28(11)  | C24-C8-C20-C21  | 0.58(19)    |
| C1-C2-C7-C15  | 25.22(15)   | C2-C8-C20-C21   | -175.30(12) |
| C3-C2-C7-C19  | 92.38(13)   | C8-C20-C21-C22  | -0.1(2)     |
| C8-C2-C7-C19  | -39.02(15)  | C20-C21-C22-C23 | -0.3(2)     |
| C1-C2-C7-C19  | -157.08(11) | C21-C22-C23-C24 | 0.18(19)    |
| C3-C2-C8-C24  | 6.65(15)    | C22-C23-C24-C8  | 0.35(19)    |
| C7-C2-C8-C24  | 137.07(11)  | C20-C8-C24-C23  | -0.72(18)   |
| C1-C2-C8-C24  | -103.10(12) | C2-C8-C24-C23   | 175.07(11)  |
| C3-C2-C8-C20  | -177.58(11) | C34-N2-C31-O6   | -179.21(12) |
| C7-C2-C8-C20  | -47.16(14)  | C34-N2-C31-C32  | 0.58(14)    |
| C1-C2-C8-C20  | 72.68(13)   | O6-C31-C32-C33  | 179.72(12)  |
| C13-O1-C9-C10 | 2.04(17)    | N2-C31-C32-C33  | -0.07(12)   |
| C13-O1-C9-C3  | -177.61(11) | O6-C31-C32-C37  | -61.20(15)  |
| C4-C3-C9-O1   | 178.93(10)  | N2-C31-C32-C37  | 119.00(11)  |

|                 |             |                 |             |
|-----------------|-------------|-----------------|-------------|
| O6-C31-C32-C38  | 62.19(15)   | C32-C33-C39-O4  | -0.2(2)     |
| N2-C31-C32-C38  | -117.61(11) | C34-C33-C39-C40 | -1.06(18)   |
| C37-C32-C33-C34 | -114.50(11) | C32-C33-C39-C40 | 179.80(12)  |
| C38-C32-C33-C34 | 115.88(11)  | O4-C39-C40-C41  | -179.65(12) |
| C31-C32-C33-C34 | -0.46(13)   | C33-C39-C40-C41 | 0.31(19)    |
| C37-C32-C33-C39 | 64.69(17)   | C44-O5-C41-C42  | -0.01(18)   |
| C38-C32-C33-C39 | -64.92(17)  | C44-O5-C41-C40  | -179.55(11) |
| C31-C32-C33-C39 | 178.73(13)  | C39-C40-C41-O5  | 179.76(11)  |
| C39-C33-C34-C42 | 1.39(19)    | C39-C40-C41-C42 | 0.21(19)    |
| C32-C33-C34-C42 | -179.30(11) | C33-C34-C42-C41 | -0.87(19)   |
| C39-C33-C34-N2  | -178.49(11) | N2-C34-C42-C41  | 178.98(12)  |
| C32-C33-C34-N2  | 0.83(14)    | O5-C41-C42-C34  | -179.46(12) |
| C31-N2-C34-C33  | -0.90(14)   | C40-C41-C42-C34 | 0.05(18)    |
| C31-N2-C34-C42  | 179.23(12)  | C49-C37-C45-C46 | 1.3(2)      |
| C33-C32-C37-C45 | 15.63(16)   | C32-C37-C45-C46 | 178.78(13)  |
| C38-C32-C37-C45 | 144.47(12)  | C37-C45-C46-C47 | -0.6(2)     |
| C31-C32-C37-C45 | -94.09(13)  | C45-C46-C47-C48 | -0.4(2)     |
| C33-C32-C37-C49 | -166.90(11) | C46-C47-C48-C49 | 0.8(2)      |
| C38-C32-C37-C49 | -38.06(15)  | C47-C48-C49-C37 | -0.1(2)     |
| C31-C32-C37-C49 | 83.38(13)   | C45-C37-C49-C48 | -0.92(19)   |
| C33-C32-C38-C54 | -89.92(14)  | C32-C37-C49-C48 | -178.45(12) |
| C37-C32-C38-C54 | 140.05(12)  | C54-C38-C50-C51 | 0.52(19)    |
| C31-C32-C38-C54 | 20.19(15)   | C32-C38-C50-C51 | -176.53(12) |
| C33-C32-C38-C50 | 87.03(13)   | C38-C50-C51-C52 | -0.7(2)     |
| C37-C32-C38-C50 | -43.00(15)  | C50-C51-C52-C53 | 0.5(2)      |
| C31-C32-C38-C50 | -162.86(11) | C51-C52-C53-C54 | -0.1(2)     |
| C43-O4-C39-C33  | 172.36(12)  | C50-C38-C54-C53 | -0.1(2)     |
| C43-O4-C39-C40  | -7.69(19)   | C32-C38-C54-C53 | 176.90(12)  |
| C34-C33-C39-O4  | 178.90(11)  | C52-C53-C54-C38 | -0.1(2)     |

**Table S34.** Hydrogen bonds and close contacts for **3** [ $P2_1/c$ ] [ $\text{\AA}$  and  $^\circ$ ].

| D-H...A    | d(D-H)    | d(H...A)  | d(D...A)   | $\angle(\text{DHA})$ |
|------------|-----------|-----------|------------|----------------------|
| N1-H1...O6 | 0.913(19) | 1.893(19) | 2.7999(13) | 172.1(17)            |
| N2-H2...O3 | 0.898(17) | 1.960(17) | 2.8498(14) | 170.2(16)            |

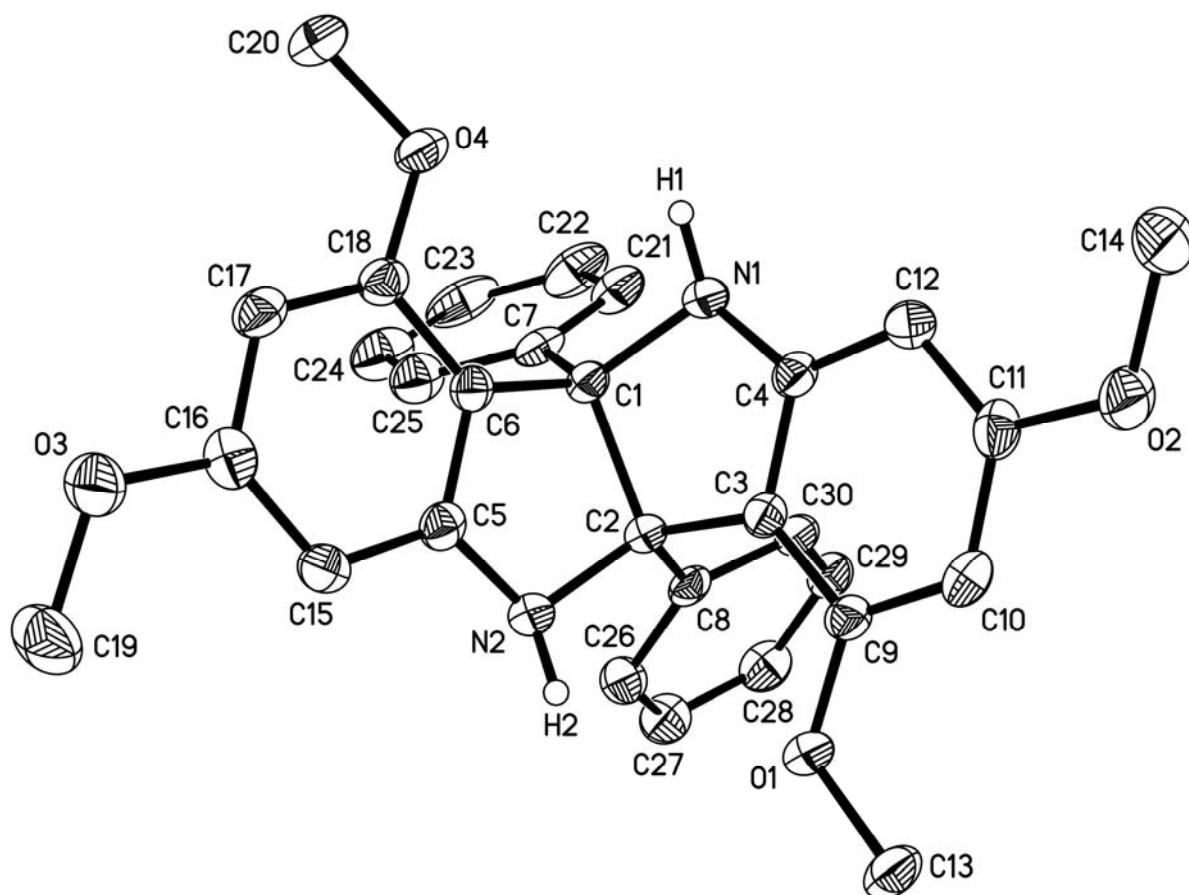

**Figure S58.** ORTEP diagram of **4** with thermal ellipsoids drawn at 50% probability level. Hydrogen atoms were omitted for clarity, except for H1 and H2, to emphasize valency of the nitrogen atoms.

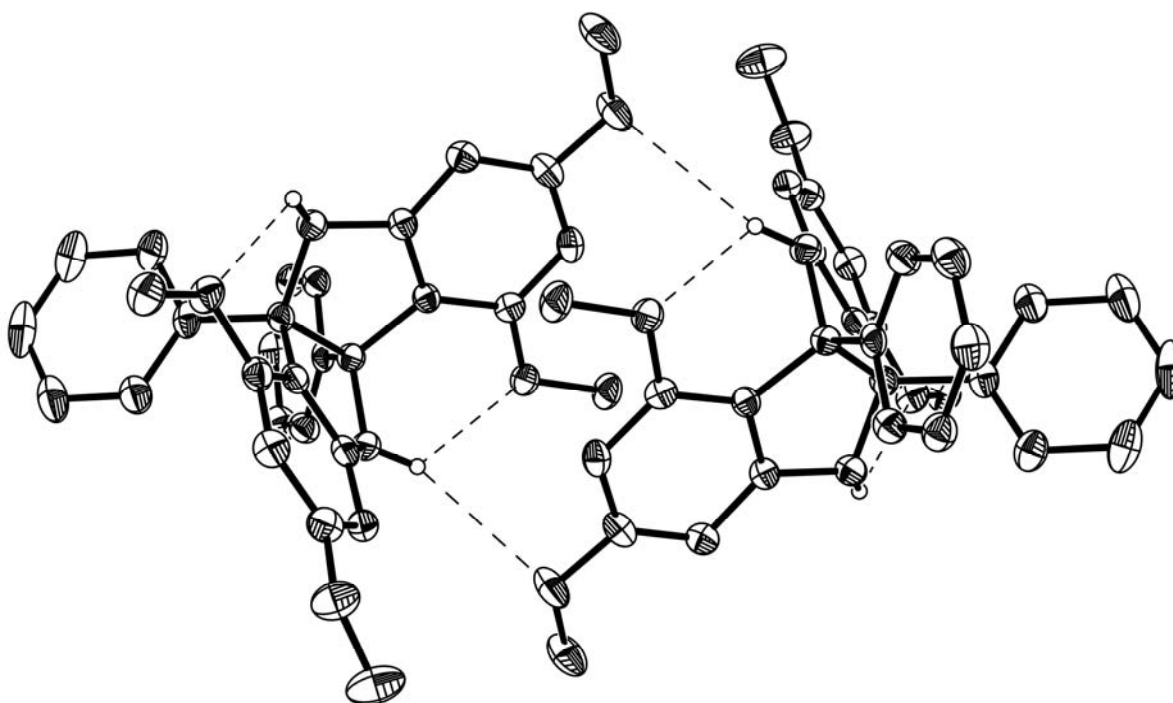

**Figure S59.** ORTEP diagram of (+/-)-**4** with thermal ellipsoids drawn at 50% probability level. Hydrogen atoms were omitted for clarity, except for H1, H2, H1A, and H2A, to emphasize intermolecular and intramolecular hydrogen bonding.

## Experimental Details for the Structure Determination of (+/-)-4.

### Data collection

A crystal (0.20 x 0.14 x 0.10 mm<sup>3</sup>) was placed onto the tip of a 0.1 mm diameter glass capillary tube or fiber and mounted on a Bruker SMART APEX II CCD Platform diffractometer for a data collection at 100.0(1) K.<sup>1</sup> A preliminary set of cell constants and an orientation matrix were calculated from reflections harvested from three orthogonal wedges of reciprocal space. The full data collection was carried out using MoK $\alpha$  radiation (graphite monochromator) with a frame time of 60 seconds and a detector distance of 4.01 cm. A randomly oriented region of reciprocal space was surveyed: four major sections of frames were collected with 0.50° steps in  $\omega$  at four different  $\phi$  settings and a detector position of -38° in  $2\theta$ . The intensity data were corrected for absorption.<sup>2</sup> Final cell constants were calculated from the xyz centroids of 4064 strong reflections from the actual data collection after integration.<sup>3</sup> See Table S35 for additional crystal and refinement information.

### Structure solution and refinement

The structure was solved using SHELXS-97<sup>4</sup> and refined using SHELXL-97.<sup>4</sup> The space group  $P2_1/c$  was determined based on systematic absences. A direct-methods solution was calculated which provided most non-hydrogen atoms from the E-map. Full-matrix least squares / difference Fourier cycles were performed which located the remaining non-hydrogen atoms. Amine hydrogen atoms were found from the difference Fourier map and their positional and isotropic displacement parameters were refined independently from those of all other atoms. All other hydrogen atoms were placed in ideal positions and refined as riding atoms with relative isotropic displacement parameters. The final full matrix least squares refinement converged to  $R1 = 0.0515$  ( $F^2$ ,  $I > 2\sigma(I)$ ) and  $wR2 = 0.1210$  ( $F^2$ , all data).

### Structure description

The structure is the one suggested with all atoms in general positions. Weak intermolecular and intramolecular hydrogen bonding is observed (see Figure S59 and Table S41).

### References

<sup>1</sup> APEX2, version 2010.3-0; Bruker AXS: Madison, WI, 2010.

<sup>2</sup> Sheldrick, G. M. *SADABS*, version 2008/1; University of Göttingen: Göttingen, Germany, 2008.

<sup>3</sup> *SAINT*, version 7.68A; Bruker AXS: Madison, WI, 2009.

<sup>4</sup> Sheldrick, G. M. *Acta. Cryst.* **2008**, *A64*, 112-122.

### Some equations of interest:

$$\begin{aligned}R_{\text{int}} &= \Sigma |F_o^2 - \langle F_o^2 \rangle| / \Sigma |F_o^2| \\R1 &= \Sigma ||F_o| - |F_c|| / \Sigma |F_o| \\wR2 &= [\Sigma [w(F_o^2 - F_c^2)^2] / \Sigma [w(F_o^2)^2]]^{1/2} \\ \text{where } w &= 1 / [\sigma^2(F_o^2) + (aP)^2 + bP] \text{ and} \\ P &= 1/3 \max(0, F_o^2) + 2/3 F_c^2 \\ \text{Goof} = S &= [\Sigma [w(F_o^2 - F_c^2)^2] / (m-n)]^{1/2}\end{aligned}$$

where  $m$  = number of reflections and  $n$  = number of parameters



**Table S35.** Crystal data and structure refinement for (+/-)-**4**.

|                                                     |                                                               |                              |
|-----------------------------------------------------|---------------------------------------------------------------|------------------------------|
| Identification code                                 | (±)- <b>4</b> , JONJK56                                       |                              |
| Empirical formula                                   | C <sub>30</sub> H <sub>28</sub> N <sub>2</sub> O <sub>4</sub> |                              |
| Formula weight                                      | 480.54                                                        |                              |
| Temperature                                         | 100.0(1) K                                                    |                              |
| Wavelength                                          | 0.71073 Å                                                     |                              |
| Crystal system                                      | Monoclinic                                                    |                              |
| Space group                                         | <i>P</i> 2 <sub>1</sub> / <i>c</i>                            |                              |
| Unit cell dimensions                                | <i>a</i> = 10.8867(6) Å                                       | $\alpha = 90^\circ$          |
|                                                     | <i>b</i> = 11.7612(7) Å                                       | $\beta = 100.1780(10)^\circ$ |
|                                                     | <i>c</i> = 19.4486(11) Å                                      | $\gamma = 90^\circ$          |
| Volume                                              | 2451.0(2) Å <sup>3</sup>                                      |                              |
| <i>Z</i>                                            | 4                                                             |                              |
| Density (calculated)                                | 1.302 Mg/m <sup>3</sup>                                       |                              |
| Absorption coefficient                              | 0.087 mm <sup>-1</sup>                                        |                              |
| <i>F</i> (000)                                      | 1016                                                          |                              |
| Crystal color, morphology                           | colorless, plate                                              |                              |
| Crystal size                                        | 0.20 x 0.14 x 0.10 mm <sup>3</sup>                            |                              |
| Theta range for data collection                     | 1.90 to 28.28°                                                |                              |
| Index ranges                                        | -14 ≤ <i>h</i> ≤ 14, -15 ≤ <i>k</i> ≤ 15, -25 ≤ <i>l</i> ≤ 25 |                              |
| Reflections collected                               | 38229                                                         |                              |
| Independent reflections                             | 6096 [ <i>R</i> (int) = 0.1120]                               |                              |
| Observed reflections                                | 3542                                                          |                              |
| Completeness to theta = 28.28°                      | 100.0%                                                        |                              |
| Absorption correction                               | Multi-scan                                                    |                              |
| Max. and min. transmission                          | 0.9914 and 0.9829                                             |                              |
| Refinement method                                   | Full-matrix least-squares on <i>F</i> <sup>2</sup>            |                              |
| Data / restraints / parameters                      | 6096 / 0 / 337                                                |                              |
| Goodness-of-fit on <i>F</i> <sup>2</sup>            | 1.005                                                         |                              |
| Final <i>R</i> indices [ <i>I</i> > 2σ( <i>I</i> )] | <i>R</i> 1 = 0.0515, <i>wR</i> 2 = 0.0969                     |                              |
| <i>R</i> indices (all data)                         | <i>R</i> 1 = 0.1086, <i>wR</i> 2 = 0.1210                     |                              |
| Largest diff. peak and hole                         | 0.289 and -0.257 e.Å <sup>-3</sup>                            |                              |

**Table S36.** Atomic coordinates ( $\times 10^4$ ) and equivalent isotropic displacement parameters ( $\text{\AA}^2 \times 10^3$ ) for (+/-)-4.  $U_{\text{eq}}$  is defined as one third of the trace of the orthogonalized  $U_{ij}$  tensor.

|     | x        | y        | z       | $U_{\text{eq}}$ |
|-----|----------|----------|---------|-----------------|
| O1  | 1184(1)  | 1448(1)  | 5630(1) | 24(1)           |
| O2  | -3115(1) | 1272(1)  | 4606(1) | 35(1)           |
| O3  | 3522(1)  | -1792(1) | 3004(1) | 35(1)           |
| O4  | 1030(1)  | 1400(1)  | 2104(1) | 26(1)           |
| N1  | 132(2)   | 2681(2)  | 3354(1) | 23(1)           |
| N2  | 2715(2)  | 1417(2)  | 4459(1) | 22(1)           |
| C1  | 1493(2)  | 2469(2)  | 3496(1) | 20(1)           |
| C2  | 1803(2)  | 2355(2)  | 4337(1) | 20(1)           |
| C3  | 533(2)   | 2029(2)  | 4479(1) | 20(1)           |
| C4  | -382(2)  | 2211(2)  | 3898(1) | 20(1)           |
| C5  | 2563(2)  | 743(2)   | 3856(1) | 22(1)           |
| C6  | 1875(2)  | 1298(2)  | 3291(1) | 20(1)           |
| C7  | 2205(2)  | 3410(2)  | 3204(1) | 24(1)           |
| C8  | 2299(2)  | 3428(2)  | 4724(1) | 21(1)           |
| C9  | 211(2)   | 1605(2)  | 5088(1) | 21(1)           |
| C10 | -1025(2) | 1364(2)  | 5112(1) | 24(1)           |
| C11 | -1925(2) | 1551(2)  | 4518(1) | 25(1)           |
| C12 | -1640(2) | 1977(2)  | 3901(1) | 24(1)           |
| C13 | 897(2)   | 994(2)   | 6268(1) | 30(1)           |
| C14 | -4085(2) | 1348(2)  | 4015(1) | 39(1)           |
| C15 | 3127(2)  | -304(2)  | 3801(1) | 24(1)           |
| C16 | 2985(2)  | -772(2)  | 3137(1) | 26(1)           |
| C17 | 2296(2)  | -241(2)  | 2552(1) | 26(1)           |
| C18 | 1734(2)  | 800(2)   | 2634(1) | 23(1)           |
| C19 | 4402(2)  | -2257(2) | 3565(1) | 46(1)           |
| C20 | 1079(2)  | 1036(2)  | 1408(1) | 30(1)           |
| C21 | 1706(2)  | 4494(2)  | 3081(1) | 31(1)           |
| C22 | 2398(3)  | 5358(2)  | 2854(1) | 40(1)           |
| C23 | 3583(3)  | 5150(2)  | 2736(1) | 43(1)           |
| C24 | 4089(2)  | 4083(2)  | 2846(1) | 40(1)           |
| C25 | 3403(2)  | 3215(2)  | 3079(1) | 31(1)           |
| C26 | 3527(2)  | 3519(2)  | 5068(1) | 26(1)           |
| C27 | 3949(2)  | 4515(2)  | 5420(1) | 31(1)           |

|     |         |         |         |       |
|-----|---------|---------|---------|-------|
| C28 | 3161(2) | 5436(2) | 5413(1) | 32(1) |
| C29 | 1941(2) | 5362(2) | 5061(1) | 27(1) |
| C30 | 1512(2) | 4360(2) | 4732(1) | 24(1) |

---

**Table S37.** Bond lengths [Å] and angles [°] for (+/-)-4.

|              |          |                 |            |
|--------------|----------|-----------------|------------|
| O(1)-C(9)    | 1.368(2) | C(13)-H(13B)    | 0.9800     |
| O(1)-C(13)   | 1.434(2) | C(13)-H(13C)    | 0.9800     |
| O(2)-C(11)   | 1.376(2) | C(14)-H(14A)    | 0.9800     |
| O(2)-C(14)   | 1.421(2) | C(14)-H(14B)    | 0.9800     |
| O(3)-C(16)   | 1.378(2) | C(14)-H(14C)    | 0.9800     |
| O(3)-C(19)   | 1.428(3) | C(15)-C(16)     | 1.386(3)   |
| O(4)-C(18)   | 1.367(2) | C(15)-H(15A)    | 0.9500     |
| O(4)-C(20)   | 1.431(2) | C(16)-C(17)     | 1.396(3)   |
| N(1)-C(4)    | 1.396(2) | C(17)-C(18)     | 1.390(3)   |
| N(1)-C(1)    | 1.480(2) | C(17)-H(17A)    | 0.9500     |
| N(1)-H(1)    | 0.91(2)  | C(19)-H(19A)    | 0.9800     |
| N(2)-C(5)    | 1.401(2) | C(19)-H(19B)    | 0.9800     |
| N(2)-C(2)    | 1.476(2) | C(19)-H(19C)    | 0.9800     |
| N(2)-H(2)    | 0.89(2)  | C(20)-H(20A)    | 0.9800     |
| C(1)-C(6)    | 1.512(3) | C(20)-H(20B)    | 0.9800     |
| C(1)-C(7)    | 1.518(3) | C(20)-H(20C)    | 0.9800     |
| C(1)-C(2)    | 1.616(2) | C(21)-C(22)     | 1.384(3)   |
| C(2)-C(3)    | 1.506(3) | C(21)-H(21A)    | 0.9500     |
| C(2)-C(8)    | 1.519(3) | C(22)-C(23)     | 1.371(4)   |
| C(3)-C(4)    | 1.384(3) | C(22)-H(22A)    | 0.9500     |
| C(3)-C(9)    | 1.387(3) | C(23)-C(24)     | 1.373(4)   |
| C(4)-C(12)   | 1.397(3) | C(23)-H(23A)    | 0.9500     |
| C(5)-C(6)    | 1.379(3) | C(24)-C(25)     | 1.387(3)   |
| C(5)-C(15)   | 1.389(3) | C(24)-H(24A)    | 0.9500     |
| C(6)-C(18)   | 1.390(3) | C(25)-H(25A)    | 0.9500     |
| C(7)-C(25)   | 1.387(3) | C(26)-C(27)     | 1.393(3)   |
| C(7)-C(21)   | 1.389(3) | C(26)-H(26A)    | 0.9500     |
| C(8)-C(26)   | 1.389(3) | C(27)-C(28)     | 1.381(3)   |
| C(8)-C(30)   | 1.393(3) | C(27)-H(27A)    | 0.9500     |
| C(9)-C(10)   | 1.385(3) | C(28)-C(29)     | 1.386(3)   |
| C(10)-C(11)  | 1.394(3) | C(28)-H(28A)    | 0.9500     |
| C(10)-H(10A) | 0.9500   | C(29)-C(30)     | 1.383(3)   |
| C(11)-C(12)  | 1.385(3) | C(29)-H(29A)    | 0.9500     |
| C(12)-H(12A) | 0.9500   | C(30)-H(30A)    | 0.9500     |
| C(13)-H(13A) | 0.9800   | C(9)-O(1)-C(13) | 117.33(15) |

|                  |            |                     |            |
|------------------|------------|---------------------|------------|
| C(11)-O(2)-C(14) | 117.72(16) | C(26)-C(8)-C(2)     | 122.02(18) |
| C(16)-O(3)-C(19) | 116.05(17) | C(30)-C(8)-C(2)     | 119.55(17) |
| C(18)-O(4)-C(20) | 116.67(16) | O(1)-C(9)-C(10)     | 124.83(17) |
| C(4)-N(1)-C(1)   | 108.33(15) | O(1)-C(9)-C(3)      | 115.42(17) |
| C(4)-N(1)-H(1)   | 116.6(13)  | C(10)-C(9)-C(3)     | 119.74(17) |
| C(1)-N(1)-H(1)   | 112.3(13)  | C(9)-C(10)-C(11)    | 119.01(18) |
| C(5)-N(2)-C(2)   | 108.13(15) | C(9)-C(10)-H(10A)   | 120.5      |
| C(5)-N(2)-H(2)   | 115.4(15)  | C(11)-C(10)-H(10A)  | 120.5      |
| C(2)-N(2)-H(2)   | 114.1(15)  | O(2)-C(11)-C(12)    | 123.69(18) |
| N(1)-C(1)-C(6)   | 114.67(16) | O(2)-C(11)-C(10)    | 113.44(18) |
| N(1)-C(1)-C(7)   | 111.59(16) | C(12)-C(11)-C(10)   | 122.87(18) |
| C(6)-C(1)-C(7)   | 112.54(16) | C(11)-C(12)-C(4)    | 116.41(18) |
| N(1)-C(1)-C(2)   | 103.03(14) | C(11)-C(12)-H(12A)  | 121.8      |
| C(6)-C(1)-C(2)   | 99.94(15)  | C(4)-C(12)-H(12A)   | 121.8      |
| C(7)-C(1)-C(2)   | 114.24(15) | O(1)-C(13)-H(13A)   | 109.5      |
| N(2)-C(2)-C(3)   | 113.19(16) | O(1)-C(13)-H(13B)   | 109.5      |
| N(2)-C(2)-C(8)   | 111.78(15) | H(13A)-C(13)-H(13B) | 109.5      |
| C(3)-C(2)-C(8)   | 112.24(16) | O(1)-C(13)-H(13C)   | 109.5      |
| N(2)-C(2)-C(1)   | 103.84(15) | H(13A)-C(13)-H(13C) | 109.5      |
| C(3)-C(2)-C(1)   | 99.93(14)  | H(13B)-C(13)-H(13C) | 109.5      |
| C(8)-C(2)-C(1)   | 115.11(16) | O(2)-C(14)-H(14A)   | 109.5      |
| C(4)-C(3)-C(9)   | 119.93(17) | O(2)-C(14)-H(14B)   | 109.5      |
| C(4)-C(3)-C(2)   | 111.28(17) | H(14A)-C(14)-H(14B) | 109.5      |
| C(9)-C(3)-C(2)   | 128.78(17) | O(2)-C(14)-H(14C)   | 109.5      |
| C(3)-C(4)-N(1)   | 110.63(17) | H(14A)-C(14)-H(14C) | 109.5      |
| C(3)-C(4)-C(12)  | 122.04(18) | H(14B)-C(14)-H(14C) | 109.5      |
| N(1)-C(4)-C(12)  | 127.29(17) | C(16)-C(15)-C(5)    | 116.55(19) |
| C(6)-C(5)-C(15)  | 122.88(19) | C(16)-C(15)-H(15A)  | 121.7      |
| C(6)-C(5)-N(2)   | 111.51(18) | C(5)-C(15)-H(15A)   | 121.7      |
| C(15)-C(5)-N(2)  | 125.31(18) | O(3)-C(16)-C(15)    | 122.69(19) |
| C(5)-C(6)-C(18)  | 119.30(18) | O(3)-C(16)-C(17)    | 114.89(18) |
| C(5)-C(6)-C(1)   | 110.93(17) | C(15)-C(16)-C(17)   | 122.41(19) |
| C(18)-C(6)-C(1)  | 129.42(18) | C(18)-C(17)-C(16)   | 119.04(19) |
| C(25)-C(7)-C(21) | 118.3(2)   | C(18)-C(17)-H(17A)  | 120.5      |
| C(25)-C(7)-C(1)  | 120.17(19) | C(16)-C(17)-H(17A)  | 120.5      |
| C(21)-C(7)-C(1)  | 121.50(18) | O(4)-C(18)-C(17)    | 124.63(18) |
| C(26)-C(8)-C(30) | 118.43(19) | O(4)-C(18)-C(6)     | 115.56(18) |

|                     |            |                    |            |
|---------------------|------------|--------------------|------------|
| C(17)-C(18)-C(6)    | 119.81(18) | C(23)-C(24)-C(25)  | 119.9(2)   |
| O(3)-C(19)-H(19A)   | 109.5      | C(23)-C(24)-H(24A) | 120.0      |
| O(3)-C(19)-H(19B)   | 109.5      | C(25)-C(24)-H(24A) | 120.0      |
| H(19A)-C(19)-H(19B) | 109.5      | C(7)-C(25)-C(24)   | 120.8(2)   |
| O(3)-C(19)-H(19C)   | 109.5      | C(7)-C(25)-H(25A)  | 119.6      |
| H(19A)-C(19)-H(19C) | 109.5      | C(24)-C(25)-H(25A) | 119.6      |
| H(19B)-C(19)-H(19C) | 109.5      | C(8)-C(26)-C(27)   | 120.5(2)   |
| O(4)-C(20)-H(20A)   | 109.5      | C(8)-C(26)-H(26A)  | 119.8      |
| O(4)-C(20)-H(20B)   | 109.5      | C(27)-C(26)-H(26A) | 119.8      |
| H(20A)-C(20)-H(20B) | 109.5      | C(28)-C(27)-C(26)  | 120.3(2)   |
| O(4)-C(20)-H(20C)   | 109.5      | C(28)-C(27)-H(27A) | 119.8      |
| H(20A)-C(20)-H(20C) | 109.5      | C(26)-C(27)-H(27A) | 119.8      |
| H(20B)-C(20)-H(20C) | 109.5      | C(27)-C(28)-C(29)  | 119.7(2)   |
| C(22)-C(21)-C(7)    | 120.6(2)   | C(27)-C(28)-H(28A) | 120.1      |
| C(22)-C(21)-H(21A)  | 119.7      | C(29)-C(28)-H(28A) | 120.1      |
| C(7)-C(21)-H(21A)   | 119.7      | C(30)-C(29)-C(28)  | 119.9(2)   |
| C(23)-C(22)-C(21)   | 120.3(2)   | C(30)-C(29)-H(29A) | 120.1      |
| C(23)-C(22)-H(22A)  | 119.9      | C(28)-C(29)-H(29A) | 120.1      |
| C(21)-C(22)-H(22A)  | 119.9      | C(29)-C(30)-C(8)   | 121.16(19) |
| C(22)-C(23)-C(24)   | 120.1(2)   | C(29)-C(30)-H(30A) | 119.4      |
| C(22)-C(23)-H(23A)  | 120.0      | C(8)-C(30)-H(30A)  | 119.4      |
| C(24)-C(23)-H(23A)  | 120.0      |                    |            |

---

**Table S38.** Anisotropic displacement parameters ( $\text{\AA}^2 \times 10^3$ ) for (+/-)-**4**. The anisotropic displacement factor exponent takes the form:  $-2\pi^2 [ h^2 a^{*2} U_{11} + \dots + 2 h k a^* b^* U_{12} ]$

|     | $U_{11}$ | $U_{22}$ | $U_{33}$ | $U_{23}$ | $U_{13}$ | $U_{12}$ |
|-----|----------|----------|----------|----------|----------|----------|
| O1  | 26(1)    | 30(1)    | 17(1)    | 2(1)     | 4(1)     | 1(1)     |
| O2  | 21(1)    | 56(1)    | 30(1)    | -2(1)    | 8(1)     | -10(1)   |
| O3  | 41(1)    | 26(1)    | 35(1)    | -6(1)    | 1(1)     | 7(1)     |
| O4  | 33(1)    | 30(1)    | 16(1)    | -1(1)    | 4(1)     | 2(1)     |
| N1  | 21(1)    | 31(1)    | 16(1)    | 1(1)     | 2(1)     | 1(1)     |
| N2  | 23(1)    | 27(1)    | 18(1)    | 2(1)     | 4(1)     | 2(1)     |
| C1  | 20(1)    | 25(1)    | 16(1)    | 1(1)     | 4(1)     | 0(1)     |
| C2  | 20(1)    | 25(1)    | 15(1)    | 0(1)     | 3(1)     | 2(1)     |
| C3  | 20(1)    | 21(1)    | 18(1)    | -1(1)    | 5(1)     | 0(1)     |
| C4  | 22(1)    | 22(1)    | 18(1)    | -2(1)    | 4(1)     | -1(1)    |
| C5  | 18(1)    | 27(1)    | 21(1)    | 0(1)     | 6(1)     | -4(1)    |
| C6  | 17(1)    | 25(1)    | 20(1)    | 1(1)     | 6(1)     | -1(1)    |
| C7  | 29(1)    | 30(1)    | 12(1)    | -1(1)    | 4(1)     | -6(1)    |
| C8  | 22(1)    | 26(1)    | 15(1)    | 3(1)     | 7(1)     | -2(1)    |
| C9  | 24(1)    | 21(1)    | 17(1)    | -3(1)    | 3(1)     | 2(1)     |
| C10 | 29(1)    | 24(1)    | 22(1)    | -1(1)    | 10(1)    | -4(1)    |
| C11 | 21(1)    | 29(1)    | 28(1)    | -6(1)    | 8(1)     | -4(1)    |
| C12 | 23(1)    | 26(1)    | 21(1)    | -2(1)    | 2(1)     | 0(1)     |
| C13 | 39(1)    | 32(1)    | 19(1)    | 4(1)     | 10(1)    | 1(1)     |
| C14 | 22(1)    | 58(2)    | 36(1)    | -8(1)    | 4(1)     | -12(1)   |
| C15 | 21(1)    | 26(1)    | 24(1)    | 4(1)     | 4(1)     | 0(1)     |
| C16 | 24(1)    | 21(1)    | 34(1)    | -3(1)    | 6(1)     | -2(1)    |
| C17 | 28(1)    | 28(1)    | 21(1)    | -5(1)    | 3(1)     | -3(1)    |
| C18 | 22(1)    | 28(1)    | 20(1)    | 1(1)     | 5(1)     | -2(1)    |
| C19 | 52(2)    | 32(1)    | 49(2)    | -7(1)    | -6(1)    | 16(1)    |
| C20 | 38(1)    | 33(1)    | 19(1)    | -3(1)    | 4(1)     | -1(1)    |
| C21 | 42(1)    | 30(1)    | 21(1)    | 1(1)     | 9(1)     | -1(1)    |
| C22 | 67(2)    | 29(1)    | 26(1)    | 1(1)     | 14(1)    | -10(1)   |
| C23 | 63(2)    | 45(2)    | 21(1)    | 0(1)     | 10(1)    | -29(1)   |
| C24 | 35(1)    | 56(2)    | 30(1)    | 2(1)     | 9(1)     | -19(1)   |
| C25 | 29(1)    | 37(1)    | 28(1)    | 1(1)     | 6(1)     | -6(1)    |
| C26 | 22(1)    | 30(1)    | 26(1)    | 0(1)     | 4(1)     | -2(1)    |
| C27 | 26(1)    | 37(1)    | 29(1)    | -4(1)    | 3(1)     | -8(1)    |

|     |       |       |       |       |      |       |
|-----|-------|-------|-------|-------|------|-------|
| C28 | 36(1) | 31(1) | 29(1) | -4(1) | 7(1) | -8(1) |
| C29 | 31(1) | 26(1) | 24(1) | 1(1)  | 8(1) | 0(1)  |
| C30 | 24(1) | 30(1) | 18(1) | 0(1)  | 5(1) | -1(1) |

---



**Table S39.** Hydrogen coordinates ( $\times 10^4$ ) and isotropic displacement parameters ( $\text{\AA}^2 \times 10^3$ ) for (+/-)-**4**.

|      | x        | y        | z        | $U_{\text{(eq)}}$ |
|------|----------|----------|----------|-------------------|
| H1   | -225(19) | 2477(18) | 2914(11) | 26(6)             |
| H2   | 2720(20) | 1043(19) | 4855(12) | 33(6)             |
| H10A | -1257    | 1076     | 5527     | 29                |
| H12A | -2265    | 2103     | 3502     | 28                |
| H13A | 1665     | 932      | 6614     | 44                |
| H13B | 519      | 240      | 6179     | 44                |
| H13C | 310      | 1501     | 6445     | 44                |
| H14A | -4888    | 1186     | 4156     | 58                |
| H14B | -3936    | 793      | 3662     | 58                |
| H14C | -4101    | 2116     | 3818     | 58                |
| H15A | 3586     | -679     | 4197     | 28                |
| H17A | 2211     | -585     | 2104     | 31                |
| H19A | 4827     | -2906    | 3394     | 69                |
| H19B | 3965     | -2511    | 3937     | 69                |
| H19C | 5017     | -1675    | 3748     | 69                |
| H20A | 502      | 1494     | 1075     | 45                |
| H20B | 838      | 233      | 1355     | 45                |
| H20C | 1930     | 1129     | 1316     | 45                |
| H21A | 881      | 4642     | 3154     | 37                |
| H22A | 2051     | 6098     | 2778     | 48                |
| H23A | 4054     | 5746     | 2579     | 51                |
| H24A | 4909     | 3938     | 2763     | 48                |
| H25A | 3757     | 2477     | 3153     | 37                |
| H26A | 4082     | 2897     | 5064     | 31                |
| H27A | 4783     | 4560     | 5665     | 37                |
| H28A | 3455     | 6117     | 5649     | 38                |
| H29A | 1400     | 5999     | 5046     | 32                |
| H30A | 665      | 4305     | 4508     | 28                |

**Table S40.** Torsion angles [°] for (+/-)-4.

|               |             |                |             |
|---------------|-------------|----------------|-------------|
| C4-N1-C1-C6   | 81.54(19)   | C2-C1-C6-C5    | -13.71(19)  |
| C4-N1-C1-C7   | -149.01(16) | N1-C1-C6-C18   | 63.8(3)     |
| C4-N1-C1-C2   | -26.0(2)    | C7-C1-C6-C18   | -65.2(3)    |
| C5-N2-C2-C3   | 84.11(19)   | C2-C1-C6-C18   | 173.24(19)  |
| C5-N2-C2-C8   | -147.97(16) | N1-C1-C7-C25   | -159.25(17) |
| C5-N2-C2-C1   | -23.28(19)  | C6-C1-C7-C25   | -28.7(2)    |
| N1-C1-C2-N2   | 140.09(15)  | C2-C1-C7-C25   | 84.4(2)     |
| C6-C1-C2-N2   | 21.69(17)   | N1-C1-C7-C21   | 23.4(2)     |
| C7-C1-C2-N2   | -98.69(18)  | C6-C1-C7-C21   | 153.97(18)  |
| N1-C1-C2-C3   | 23.03(18)   | C2-C1-C7-C21   | -93.0(2)    |
| C6-C1-C2-C3   | -95.37(16)  | N2-C2-C8-C26   | 7.8(2)      |
| C7-C1-C2-C3   | 144.26(17)  | C3-C2-C8-C26   | 136.18(18)  |
| N1-C1-C2-C8   | -97.40(18)  | C1-C2-C8-C26   | -110.4(2)   |
| C6-C1-C2-C8   | 144.20(16)  | N2-C2-C8-C30   | -172.77(17) |
| C7-C1-C2-C8   | 23.8(2)     | C3-C2-C8-C30   | -44.3(2)    |
| N2-C2-C3-C4   | -123.37(18) | C1-C2-C8-C30   | 69.1(2)     |
| C8-C2-C3-C4   | 108.95(19)  | C13-O1-C9-C10  | 0.3(3)      |
| C1-C2-C3-C4   | -13.5(2)    | C13-O1-C9-C3   | -179.09(17) |
| N2-C2-C3-C9   | 57.1(3)     | C4-C3-C9-O1    | 179.52(17)  |
| C8-C2-C3-C9   | -70.6(3)    | C2-C3-C9-O1    | -1.0(3)     |
| C1-C2-C3-C9   | 166.9(2)    | C4-C3-C9-C10   | 0.1(3)      |
| C9-C3-C4-N1   | 177.58(18)  | C2-C3-C9-C10   | 179.56(19)  |
| C2-C3-C4-N1   | -2.0(2)     | O1-C9-C10-C11  | -179.16(19) |
| C9-C3-C4-C12  | -0.2(3)     | C3-C9-C10-C11  | 0.2(3)      |
| C2-C3-C4-C12  | -179.75(18) | C14-O2-C11-C12 | 4.8(3)      |
| C1-N1-C4-C3   | 18.7(2)     | C14-O2-C11-C10 | -175.20(19) |
| C1-N1-C4-C12  | -163.7(2)   | C9-C10-C11-O2  | 179.55(18)  |
| C2-N2-C5-C6   | 15.6(2)     | C9-C10-C11-C12 | -0.5(3)     |
| C2-N2-C5-C15  | -170.55(18) | O2-C11-C12-C4  | -179.66(19) |
| C15-C5-C6-C18 | -0.2(3)     | C10-C11-C12-C4 | 0.3(3)      |
| N2-C5-C6-C18  | 173.83(17)  | C3-C4-C12-C11  | 0.0(3)      |
| C15-C5-C6-C1  | -174.01(17) | N1-C4-C12-C11  | -177.40(19) |
| N2-C5-C6-C1   | 0.0(2)      | C6-C5-C15-C16  | 1.0(3)      |
| N1-C1-C6-C5   | -123.13(18) | N2-C5-C15-C16  | -172.13(18) |
| C7-C1-C6-C5   | 107.89(18)  | C19-O3-C16-C15 | -9.8(3)     |

|                 |             |                 |             |
|-----------------|-------------|-----------------|-------------|
| C19-O3-C16-C17  | 169.7(2)    | C7-C21-C22-C23  | 0.9(3)      |
| C5-C15-C16-O3   | 178.27(18)  | C21-C22-C23-C24 | -0.2(3)     |
| C5-C15-C16-C17  | -1.1(3)     | C22-C23-C24-C25 | -0.3(3)     |
| O3-C16-C17-C18  | -179.06(18) | C21-C7-C25-C24  | 0.8(3)      |
| C15-C16-C17-C18 | 0.4(3)      | C1-C7-C25-C24   | -176.63(19) |
| C20-O4-C18-C17  | -12.4(3)    | C23-C24-C25-C7  | 0.0(3)      |
| C20-O4-C18-C6   | 167.49(17)  | C30-C8-C26-C27  | 0.8(3)      |
| C16-C17-C18-O4  | -179.54(18) | C2-C8-C26-C27   | -179.75(18) |
| C16-C17-C18-C6  | 0.5(3)      | C8-C26-C27-C28  | -1.8(3)     |
| C5-C6-C18-O4    | 179.43(17)  | C26-C27-C28-C29 | 0.8(3)      |
| C1-C6-C18-O4    | -8.0(3)     | C27-C28-C29-C30 | 1.4(3)      |
| C5-C6-C18-C17   | -0.6(3)     | C28-C29-C30-C8  | -2.5(3)     |
| C1-C6-C18-C17   | 171.91(19)  | C26-C8-C30-C29  | 1.4(3)      |
| C25-C7-C21-C22  | -1.2(3)     | C2-C8-C30-C29   | -178.10(18) |
| C1-C7-C21-C22   | 176.15(19)  |                 |             |

**Table S41.** Hydrogen bonds and close contacts for (+/-)-**4** [Å and °].

| D-H...A      | d(D-H)  | d(H...A) | d(D...A) | <(DHA)    |
|--------------|---------|----------|----------|-----------|
| N1-H1...O4   | 0.91(2) | 2.59(2)  | 3.158(2) | 121.3(16) |
| N2-H2...O1   | 0.89(2) | 2.48(2)  | 3.051(2) | 122.3(18) |
| N2-H2...O2#1 | 0.89(2) | 2.92(2)  | 3.635(2) | 138.6(18) |

Symmetry transformations used to generate equivalent atoms:

#1 -x, -y, -z-1

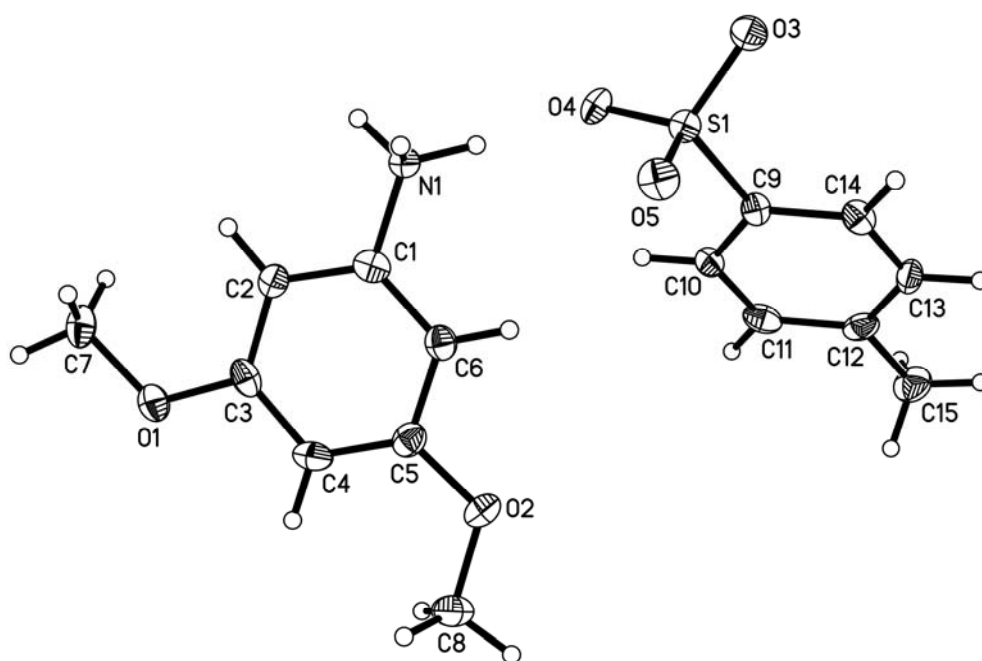

**Figure S60.** ORTEP diagram of **5** with thermal ellipsoids drawn at 50% probability level.

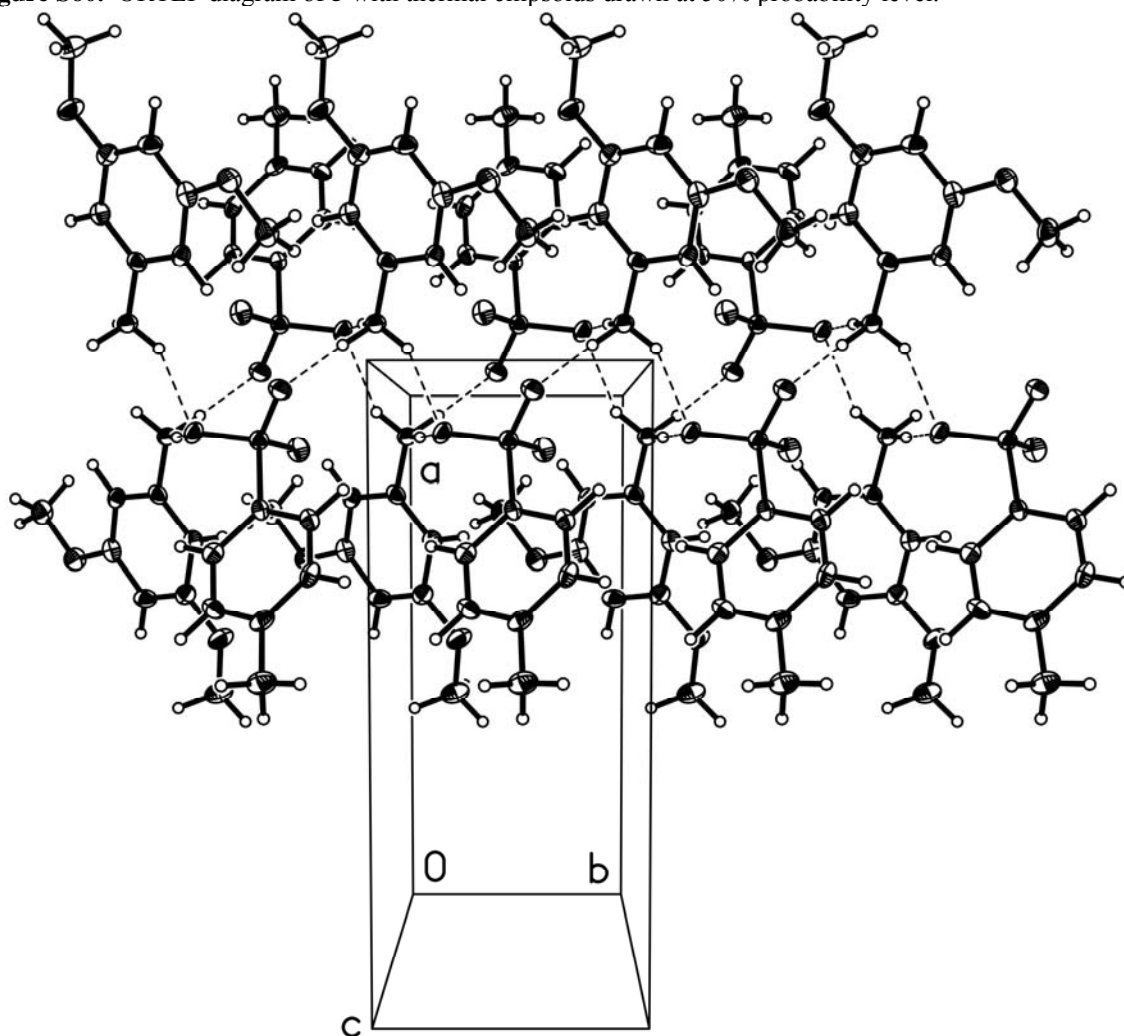

**Figure S61.** ORTEP diagram of **5** with thermal ellipsoids drawn at 50% probability level showing intermolecular hydrogen bonding.

## Experimental Details for the Structure Determination of 5.

### Data collection

A crystal (0.38 x 0.15 x 0.06 mm<sup>3</sup>) was placed onto the tip of a 0.1 mm diameter glass capillary tube or fiber and mounted on a Bruker SMART APEX II CCD Platform diffractometer for a data collection at 100.0(5) K.<sup>1</sup> A preliminary set of cell constants and an orientation matrix were calculated from reflections harvested from three orthogonal wedges of reciprocal space. The full data collection was carried out using MoK $\alpha$  radiation (graphite monochromator) with a frame time of 120 seconds and a detector distance of 4.01 cm. A randomly oriented region of reciprocal space was surveyed: four major sections of frames were collected with 0.50° steps in  $\omega$  at four different  $\phi$  settings and a detector position of -38° in  $2\theta$ . The intensity data were corrected for absorption.<sup>2</sup> Final cell constants were calculated from the xyz centroids of 2539 strong reflections from the actual data collection after integration.<sup>3</sup> See Table S42 for additional crystal and refinement information.

### Structure solution and refinement

The structure was solved using SIR97<sup>4</sup> and refined using SHELXL-97.<sup>5</sup> The space group  $P2_1/n$  was determined based on systematic absences. A direct-methods solution was calculated which provided most non-hydrogen atoms from the E-map. Full-matrix least squares / difference Fourier cycles were performed which located the remaining non-hydrogen atoms. All non-hydrogen atoms were refined with anisotropic displacement parameters. Ammonium hydrogen atoms were found from the difference Fourier map, and their positional and isotropic displacement parameters were refined independently from those of the nitrogen atom. All other hydrogen atoms were placed in ideal positions and refined as riding atoms with relative isotropic displacement parameters.

The refinement stalled at  $R1 = 0.139$ , at which point twin modeling was required. After the non-merohedral twin law, [ 0.571 0 -0.429 / 0 -1 0 / -1.571 0 -0.571 ], a 180° rotation about reciprocal lattice [ -1 0 1 ], was determined,<sup>6</sup> the data were re-integrated,<sup>3</sup> and a new absorption correction was applied.<sup>7</sup> There were 2074 unique reflections solely in the first component, 1960 unique reflections solely in the second component, and 1390 unique overlapping reflections. The mass ratio of the two components refined to 60:40. The final full matrix least squares refinement converged to  $R1 = 0.0528$  ( $F^2$ ,  $I > 2\sigma(I)$ ) and  $wR2 = 0.1117$  ( $F^2$ , all data).

### Structure description

The structure is the one suggested, with all atoms in general positions. Moderate intermolecular hydrogen bonding links the molecules one-dimensionally in the direction parallel to the  $b$ -axis (see Figure S61 and Table S48).

### References

- <sup>1</sup> APEX2, version 2011.4-1; Bruker AXS: Madison, WI, 2011.
- <sup>2</sup> Sheldrick, G. M. *SADABS*, version 2008/1; University of Göttingen: Göttingen, Germany, 2008.
- <sup>3</sup> SAINT, version 7.68A; Bruker AXS: Madison, WI, 2009.
- <sup>4</sup> Altomare, A.; Burla, M. C.; Camalli, M.; Casciarano, G. L.; Giacovazzo, C.; Guagliardi, A.; Moliterni, A. G. G.; Polidori, G.; Spagna, R. *SIR97: A new program for solving and refining crystal structures*; Istituto di Cristallografia, CNR: Bari, Italy, 1999.

<sup>5</sup> Sheldrick, G. M. *Acta. Cryst.* **2008**, *A64*, 112-122.

<sup>6</sup> a) Parsons, S.; Gould, B.; Cooper, R.; Farrugia, L. *ROTAX*; University of Edinburgh: Edinburgh, Scotland, 2003; b) Sheldrick, G. M. *CELL\_NOW: A program that analyzes a list of reflections to find a cell and orientation matrix despite the presence of several twin domains or other junk*, version 2008/2; University of Göttingen: Göttingen, Germany, 2008.

<sup>7</sup> Sheldrick, G. M. *TWINABS*, version 2008/4; University of Göttingen: Göttingen, Germany, 2008.

**Some equations of interest:**

$$R_{\text{int}} = \Sigma |F_o^2 - \langle F_o^2 \rangle| / \Sigma |F_o^2|$$

$$R1 = \Sigma ||F_o| - |F_c|| / \Sigma |F_o|$$

$$wR2 = [\Sigma [w(F_o^2 - F_c^2)^2] / \Sigma [w(F_o^2)^2]]^{1/2}$$

where  $w = 1 / [\sigma^2(F_o^2) + (aP)^2 + bP]$  and

$$P = 1/3 \max(0, F_o^2) + 2/3 F_c^2$$

$$\text{GooF} = S = [\Sigma [w(F_o^2 - F_c^2)^2] / (m-n)]^{1/2}$$

where  $m$  = number of reflections and  $n$  = number of parameters

**Table S42.** Crystal data and structure refinement for **5**.

|                                                     |                                                          |                           |
|-----------------------------------------------------|----------------------------------------------------------|---------------------------|
| Identification code                                 | <b>5</b> , JONJK70                                       |                           |
| Empirical formula                                   | C <sub>15</sub> H <sub>19</sub> N O <sub>5</sub> S       |                           |
| Formula weight                                      | 325.37                                                   |                           |
| Temperature                                         | 100.0(5) K                                               |                           |
| Wavelength                                          | 0.71073 Å                                                |                           |
| Crystal system                                      | Monoclinic                                               |                           |
| Space group                                         | <i>P</i> 2 <sub>1</sub> / <i>n</i>                       |                           |
| Unit cell dimensions                                | <i>a</i> = 13.031(4) Å                                   | $\alpha = 90^\circ$       |
|                                                     | <i>b</i> = 5.3646(17) Å                                  | $\beta = 99.179(6)^\circ$ |
|                                                     | <i>c</i> = 22.323(7) Å                                   | $\gamma = 90^\circ$       |
| Volume                                              | 1540.6(8) Å <sup>3</sup>                                 |                           |
| <i>Z</i>                                            | 4                                                        |                           |
| Density (calculated)                                | 1.403 Mg/m <sup>3</sup>                                  |                           |
| Absorption coefficient                              | 0.233 mm <sup>-1</sup>                                   |                           |
| <i>F</i> (000)                                      | 688                                                      |                           |
| Crystal color, morphology                           | colorless, needle                                        |                           |
| Crystal size                                        | 0.38 x 0.15 x 0.06 mm <sup>3</sup>                       |                           |
| Theta range for data collection                     | 1.85 to 25.03°                                           |                           |
| Index ranges                                        | -15 ≤ <i>h</i> ≤ 15, 0 ≤ <i>k</i> ≤ 6, 0 ≤ <i>l</i> ≤ 26 |                           |
| Reflections collected                               | 24078                                                    |                           |
| Independent reflections                             | 2727 [ <i>R</i> (int) = 0.1286]                          |                           |
| Observed reflections                                | 1902                                                     |                           |
| Completeness to theta = 25.03°                      | 99.8%                                                    |                           |
| Absorption correction                               | Multi-scan                                               |                           |
| Max. and min. transmission                          | 0.9861 and 0.9166                                        |                           |
| Refinement method                                   | Full-matrix least-squares on <i>F</i> <sup>2</sup>       |                           |
| Data / restraints / parameters                      | 2727 / 0 / 215                                           |                           |
| Goodness-of-fit on <i>F</i> <sup>2</sup>            | 1.041                                                    |                           |
| Final <i>R</i> indices [ <i>I</i> > 2σ( <i>I</i> )] | <i>R</i> 1 = 0.0528, <i>wR</i> 2 = 0.0970                |                           |
| <i>R</i> indices (all data)                         | <i>R</i> 1 = 0.0945, <i>wR</i> 2 = 0.1117                |                           |
| Largest diff. peak and hole                         | 0.312 and -0.393 e.Å <sup>-3</sup>                       |                           |

**Table S43.** Atomic coordinates ( $\times 10^4$ ) and equivalent isotropic displacement parameters ( $\text{\AA}^2 \times 10^3$ ) for **5**.  $U_{\text{eq}}$  is defined as one third of the trace of the orthogonalized  $U_{ij}$  tensor.

|     | x       | y        | z       | $U_{\text{eq}}$ |
|-----|---------|----------|---------|-----------------|
| O1  | 6877(2) | 14063(5) | 6667(1) | 26(1)           |
| O2  | 5510(2) | 7315(5)  | 5408(1) | 28(1)           |
| N1  | 9056(2) | 9453(7)  | 5471(2) | 19(1)           |
| C1  | 8057(3) | 9968(7)  | 5664(2) | 19(1)           |
| C2  | 7996(3) | 11911(7) | 6066(2) | 18(1)           |
| C3  | 7048(3) | 12257(7) | 6262(2) | 21(1)           |
| C4  | 6199(3) | 10758(7) | 6052(2) | 23(1)           |
| C5  | 6291(3) | 8867(7)  | 5652(2) | 21(1)           |
| C6  | 7238(3) | 8428(7)  | 5456(2) | 19(1)           |
| C7  | 7739(3) | 15587(8) | 6918(2) | 27(1)           |
| C8  | 4544(3) | 7518(9)  | 5634(2) | 31(1)           |
| S1  | 8954(1) | 5190(2)  | 4166(1) | 18(1)           |
| O3  | 9783(2) | 4230(5)  | 3860(1) | 24(1)           |
| O4  | 9086(2) | 7854(4)  | 4293(1) | 22(1)           |
| O5  | 8806(2) | 3768(5)  | 4697(1) | 24(1)           |
| C9  | 7802(3) | 4991(7)  | 3633(2) | 17(1)           |
| C10 | 7067(3) | 6879(7)  | 3593(2) | 20(1)           |
| C11 | 6170(3) | 6727(8)  | 3165(2) | 22(1)           |
| C12 | 5996(3) | 4698(8)  | 2770(2) | 22(1)           |
| C13 | 6745(3) | 2833(7)  | 2823(2) | 21(1)           |
| C14 | 7634(3) | 2948(7)  | 3254(2) | 20(1)           |
| C15 | 5037(3) | 4588(9)  | 2302(2) | 30(1)           |



**Table S44.** Bond lengths [Å] and angles [°] for **5**.

|              |          |                  |          |
|--------------|----------|------------------|----------|
| O(1)-C(3)    | 1.367(4) | C(13)-C(14)      | 1.386(5) |
| O(1)-C(7)    | 1.430(4) | C(13)-H(13A)     | 0.9500   |
| O(2)-C(5)    | 1.359(4) | C(14)-H(14A)     | 0.9500   |
| O(2)-C(8)    | 1.433(4) | C(15)-H(15A)     | 0.9800   |
| N(1)-C(1)    | 1.462(5) | C(15)-H(15B)     | 0.9800   |
| N(1)-H(1N)   | 1.00(4)  | C(15)-H(15C)     | 0.9800   |
| N(1)-H(2N)   | 0.96(5)  | C(3)-O(1)-C(7)   | 117.7(3) |
| N(1)-H(3N)   | 0.90(4)  | C(5)-O(2)-C(8)   | 117.2(3) |
| C(1)-C(6)    | 1.371(5) | C(1)-N(1)-H(1N)  | 116(2)   |
| C(1)-C(2)    | 1.385(5) | C(1)-N(1)-H(2N)  | 112(3)   |
| C(2)-C(3)    | 1.387(5) | H(1N)-N(1)-H(2N) | 104(3)   |
| C(2)-H(2A)   | 0.9500   | C(1)-N(1)-H(3N)  | 110(3)   |
| C(3)-C(4)    | 1.387(5) | H(1N)-N(1)-H(3N) | 114(3)   |
| C(4)-C(5)    | 1.369(6) | H(2N)-N(1)-H(3N) | 99(3)    |
| C(4)-H(4A)   | 0.9500   | C(6)-C(1)-C(2)   | 123.4(3) |
| C(5)-C(6)    | 1.393(5) | C(6)-C(1)-N(1)   | 117.9(3) |
| C(6)-H(6A)   | 0.9500   | C(2)-C(1)-N(1)   | 118.7(3) |
| C(7)-H(7A)   | 0.9800   | C(1)-C(2)-C(3)   | 116.8(3) |
| C(7)-H(7B)   | 0.9800   | C(1)-C(2)-H(2A)  | 121.6    |
| C(7)-H(7C)   | 0.9800   | C(3)-C(2)-H(2A)  | 121.6    |
| C(8)-H(8A)   | 0.9800   | O(1)-C(3)-C(4)   | 115.4(3) |
| C(8)-H(8B)   | 0.9800   | O(1)-C(3)-C(2)   | 123.4(4) |
| C(8)-H(8C)   | 0.9800   | C(4)-C(3)-C(2)   | 121.2(4) |
| S(1)-O(5)    | 1.448(3) | C(5)-C(4)-C(3)   | 120.1(4) |
| S(1)-O(3)    | 1.461(3) | C(5)-C(4)-H(4A)  | 119.9    |
| S(1)-O(4)    | 1.462(3) | C(3)-C(4)-H(4A)  | 119.9    |
| S(1)-C(9)    | 1.764(4) | O(2)-C(5)-C(4)   | 125.2(3) |
| C(9)-C(14)   | 1.380(5) | O(2)-C(5)-C(6)   | 114.5(3) |
| C(9)-C(10)   | 1.387(5) | C(4)-C(5)-C(6)   | 120.3(4) |
| C(10)-C(11)  | 1.389(5) | C(1)-C(6)-C(5)   | 118.2(4) |
| C(10)-H(10A) | 0.9500   | C(1)-C(6)-H(6A)  | 120.9    |
| C(11)-C(12)  | 1.397(5) | C(5)-C(6)-H(6A)  | 120.9    |
| C(11)-H(11A) | 0.9500   | O(1)-C(7)-H(7A)  | 109.5    |
| C(12)-C(13)  | 1.389(5) | O(1)-C(7)-H(7B)  | 109.5    |
| C(12)-C(15)  | 1.497(5) | H(7A)-C(7)-H(7B) | 109.5    |

|                   |            |                     |          |
|-------------------|------------|---------------------|----------|
| O(1)-C(7)-H(7C)   | 109.5      | C(11)-C(10)-H(10A)  | 120.1    |
| H(7A)-C(7)-H(7C)  | 109.5      | C(10)-C(11)-C(12)   | 120.9(4) |
| H(7B)-C(7)-H(7C)  | 109.5      | C(10)-C(11)-H(11A)  | 119.5    |
| O(2)-C(8)-H(8A)   | 109.5      | C(12)-C(11)-H(11A)  | 119.5    |
| O(2)-C(8)-H(8B)   | 109.5      | C(13)-C(12)-C(11)   | 117.9(3) |
| H(8A)-C(8)-H(8B)  | 109.5      | C(13)-C(12)-C(15)   | 121.8(4) |
| O(2)-C(8)-H(8C)   | 109.5      | C(11)-C(12)-C(15)   | 120.3(4) |
| H(8A)-C(8)-H(8C)  | 109.5      | C(14)-C(13)-C(12)   | 121.7(4) |
| H(8B)-C(8)-H(8C)  | 109.5      | C(14)-C(13)-H(13A)  | 119.2    |
| O(5)-S(1)-O(3)    | 113.71(16) | C(12)-C(13)-H(13A)  | 119.2    |
| O(5)-S(1)-O(4)    | 112.49(16) | C(9)-C(14)-C(13)    | 119.6(4) |
| O(3)-S(1)-O(4)    | 111.31(16) | C(9)-C(14)-H(14A)   | 120.2    |
| O(5)-S(1)-C(9)    | 108.06(16) | C(13)-C(14)-H(14A)  | 120.2    |
| O(3)-S(1)-C(9)    | 106.02(16) | C(12)-C(15)-H(15A)  | 109.5    |
| O(4)-S(1)-C(9)    | 104.56(16) | C(12)-C(15)-H(15B)  | 109.5    |
| C(14)-C(9)-C(10)  | 120.0(3)   | H(15A)-C(15)-H(15B) | 109.5    |
| C(14)-C(9)-S(1)   | 119.7(3)   | C(12)-C(15)-H(15C)  | 109.5    |
| C(10)-C(9)-S(1)   | 120.2(3)   | H(15A)-C(15)-H(15C) | 109.5    |
| C(9)-C(10)-C(11)  | 119.9(4)   | H(15B)-C(15)-H(15C) | 109.5    |
| C(9)-C(10)-H(10A) | 120.1      |                     |          |

---

**Table S45.** Anisotropic displacement parameters ( $\text{\AA}^2 \times 10^3$ ) for **5**. The anisotropic displacement factor exponent takes the form:  $-2\pi^2 [ h^2 a^{*2} U_{11} + \dots + 2 h k a^* b^* U_{12} ]$

|     | $U_{11}$ | $U_{22}$ | $U_{33}$ | $U_{23}$ | $U_{13}$ | $U_{12}$ |
|-----|----------|----------|----------|----------|----------|----------|
| O1  | 28(2)    | 24(2)    | 26(2)    | -8(1)    | 8(1)     | 1(1)     |
| O2  | 21(2)    | 31(2)    | 32(2)    | -7(1)    | 3(1)     | -9(1)    |
| N1  | 16(2)    | 20(2)    | 20(2)    | -2(2)    | 4(1)     | -1(2)    |
| C1  | 20(2)    | 19(2)    | 20(2)    | 6(2)     | 4(2)     | 4(2)     |
| C2  | 22(2)    | 16(2)    | 15(2)    | 3(2)     | 1(2)     | -2(2)    |
| C3  | 30(2)    | 19(2)    | 15(2)    | 1(2)     | 7(2)     | 4(2)     |
| C4  | 17(2)    | 30(2)    | 24(2)    | 5(2)     | 7(2)     | 1(2)     |
| C5  | 21(2)    | 22(2)    | 19(2)    | 2(2)     | 0(2)     | -2(2)    |
| C6  | 23(2)    | 19(2)    | 16(2)    | 1(2)     | 3(2)     | 1(2)     |
| C7  | 33(2)    | 22(2)    | 24(2)    | -7(2)    | 1(2)     | 0(2)     |
| C8  | 23(2)    | 42(3)    | 31(3)    | -1(2)    | 9(2)     | -7(2)    |
| S1  | 19(1)    | 18(1)    | 18(1)    | 0(1)     | 2(1)     | 0(1)     |
| O3  | 19(1)    | 24(2)    | 28(2)    | -2(1)    | 3(1)     | 3(1)     |
| O4  | 23(1)    | 17(1)    | 23(2)    | -2(1)    | -1(1)    | -5(1)    |
| O5  | 29(2)    | 25(2)    | 18(2)    | 8(1)     | 3(1)     | 1(1)     |
| C9  | 20(2)    | 14(2)    | 16(2)    | 2(2)     | 3(2)     | 2(2)     |
| C10 | 21(2)    | 21(2)    | 18(2)    | -2(2)    | 7(2)     | -2(2)    |
| C11 | 19(2)    | 24(2)    | 25(2)    | 8(2)     | 8(2)     | 6(2)     |
| C12 | 20(2)    | 27(2)    | 20(2)    | 4(2)     | 5(2)     | -8(2)    |
| C13 | 28(2)    | 17(2)    | 18(2)    | -4(2)    | 6(2)     | -6(2)    |
| C14 | 23(2)    | 18(2)    | 20(2)    | 2(2)     | 6(2)     | 3(2)     |
| C15 | 23(2)    | 38(3)    | 26(2)    | -1(2)    | -3(2)    | -4(2)    |

**Table S46.** Hydrogen coordinates ( $\times 10^4$ ) and isotropic displacement parameters ( $\text{\AA}^2 \times 10^3$ ) for **5**.

|      | x        | y         | z        | $U_{\text{(eq)}}$ |
|------|----------|-----------|----------|-------------------|
| H1N  | 9030(30) | 8860(70)  | 5040(20) | 28(11)            |
| H2N  | 9440(40) | 8170(90)  | 5720(20) | 53(15)            |
| H3N  | 9490(30) | 10740(80) | 5569(18) | 26(12)            |
| H2A  | 8575     | 12956     | 6201     | 22                |
| H4A  | 5553     | 11044     | 6186     | 28                |
| H6A  | 7314     | 7099      | 5185     | 23                |
| H7A  | 7521     | 16746     | 7213     | 40                |
| H7B  | 7984     | 16532     | 6592     | 40                |
| H7C  | 8302     | 14528     | 7120     | 40                |
| H8A  | 4043     | 6330      | 5420     | 47                |
| H8B  | 4272     | 9216      | 5566     | 47                |
| H8C  | 4656     | 7148      | 6069     | 47                |
| H10A | 7178     | 8274      | 3858     | 23                |
| H11A | 5667     | 8020      | 3141     | 27                |
| H13A | 6644     | 1444      | 2556     | 25                |
| H14A | 8126     | 1627      | 3289     | 24                |
| H15A | 5018     | 6035      | 2033     | 45                |
| H15B | 4422     | 4601      | 2503     | 45                |
| H15C | 5044     | 3055      | 2064     | 45                |

**Table S47.** Torsion angles [°] for **5**.

|             |           |                 |           |
|-------------|-----------|-----------------|-----------|
| C6-C1-C2-C3 | 0.5(6)    | O5-S1-C9-C14    | -83.0(3)  |
| N1-C1-C2-C3 | -176.8(3) | O3-S1-C9-C14    | 39.2(3)   |
| C7-O1-C3-C4 | 177.3(3)  | O4-S1-C9-C14    | 156.9(3)  |
| C7-O1-C3-C2 | -2.9(5)   | O5-S1-C9-C10    | 97.0(3)   |
| C1-C2-C3-O1 | 178.7(3)  | O3-S1-C9-C10    | -140.7(3) |
| C1-C2-C3-C4 | -1.5(6)   | O4-S1-C9-C10    | -23.0(3)  |
| O1-C3-C4-C5 | -179.0(3) | C14-C9-C10-C11  | -1.0(5)   |
| C2-C3-C4-C5 | 1.2(6)    | S1-C9-C10-C11   | 179.0(3)  |
| C8-O2-C5-C4 | -6.5(6)   | C9-C10-C11-C12  | -0.4(5)   |
| C8-O2-C5-C6 | 174.4(3)  | C10-C11-C12-C13 | 0.6(5)    |
| C3-C4-C5-O2 | -178.8(4) | C10-C11-C12-C15 | -178.6(4) |
| C3-C4-C5-C6 | 0.3(6)    | C11-C12-C13-C14 | 0.4(5)    |
| C2-C1-C6-C5 | 1.0(6)    | C15-C12-C13-C14 | 179.6(4)  |
| N1-C1-C6-C5 | 178.2(3)  | C10-C9-C14-C13  | 2.0(5)    |
| O2-C5-C6-C1 | 177.9(3)  | S1-C9-C14-C13   | -177.9(3) |
| C4-C5-C6-C1 | -1.4(6)   | C12-C13-C14-C9  | -1.8(6)   |

**Table S48.** Hydrogen bonds and close contacts for **5** [Å and °].

| D-H...A       | d(D-H)  | d(H...A) | d(D...A) | <(DHA) |
|---------------|---------|----------|----------|--------|
| N1-H1N...O4   | 1.00(4) | 1.78(4)  | 2.772(4) | 176(3) |
| N1-H2N...O3#1 | 0.96(5) | 1.81(5)  | 2.775(4) | 176(4) |
| N1-H3N...O4#2 | 0.90(4) | 1.98(4)  | 2.796(4) | 150(4) |

Symmetry transformations used to generate equivalent atoms:

#1 -x+2,-y+1,-z+1 #2 -x+2,-y+2,-z+1

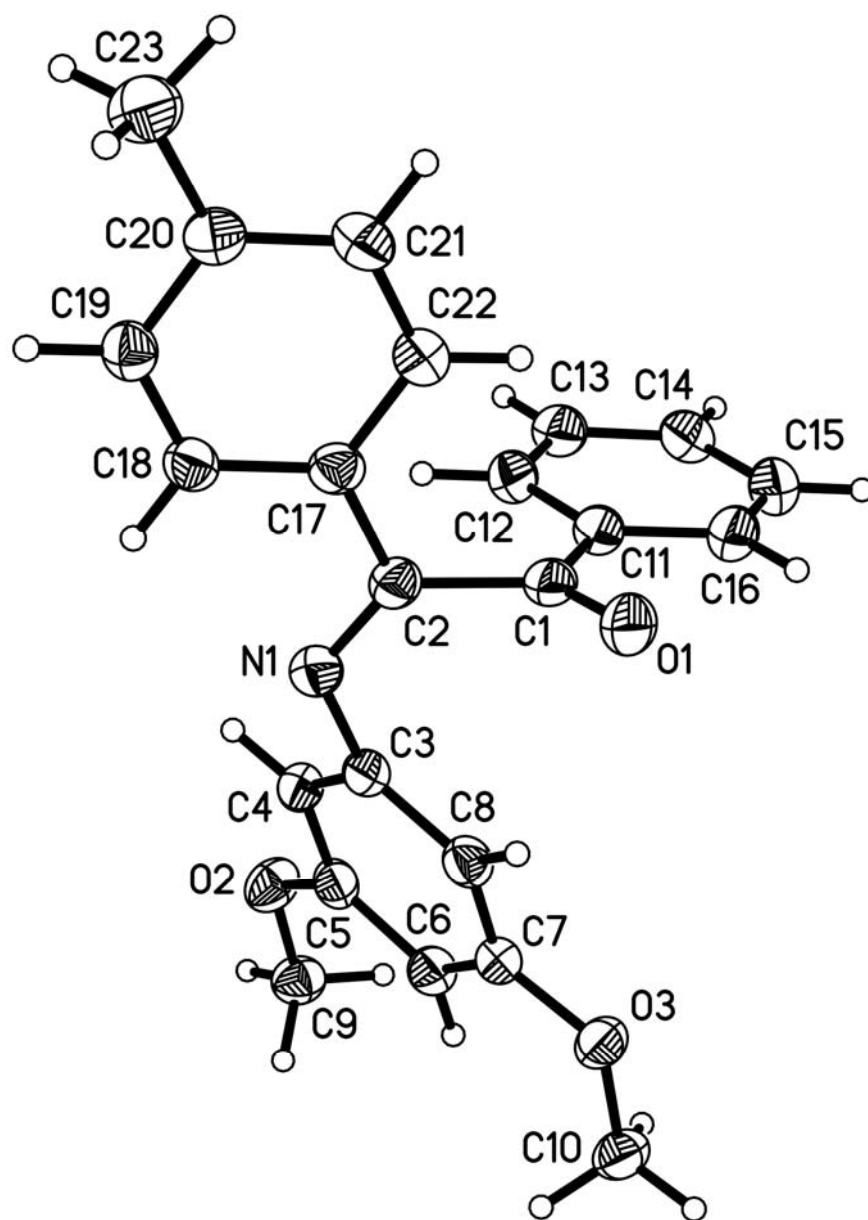

**Figure S62.** ORTEP diagram of **6b** with thermal ellipsoids drawn at 50% probability level.

## Experimental Details for the Structure Determination of **6b**.

### Data collection

A crystal (0.32 x 0.28 x 0.08 mm<sup>3</sup>) was placed onto the tip of a 0.1 mm diameter glass capillary tube or fiber and mounted on a Bruker SMART APEX II CCD Platform diffractometer for a data collection at 100.0(5) K.<sup>1</sup> A preliminary set of cell constants and an orientation matrix were calculated from reflections harvested from three orthogonal wedges of reciprocal space. The full data collection was carried out using MoK $\alpha$  radiation (graphite monochromator) with a frame time of 60 seconds and a detector distance of 3.98 cm. A randomly oriented region of reciprocal space was surveyed: four major sections of frames were collected with 0.50° steps in  $\omega$  at four different  $\phi$  settings and a detector position of -38° in  $2\theta$ . The intensity data were corrected for absorption.<sup>2</sup> Final cell constants were calculated from the xyz centroids of 3346 strong reflections from the actual data collection after integration.<sup>3</sup> See Table S49 for additional crystal and refinement information.

### Structure solution and refinement

The structure was solved using SIR97<sup>4</sup> and refined using SHELXL-97.<sup>5</sup> The space group  $P2_1/c$  was determined based on systematic absences. A direct-methods solution was calculated which provided most non-hydrogen atoms from the E-map. Full-matrix least squares / difference Fourier cycles were performed which located the remaining non-hydrogen atoms. All non-hydrogen atoms were refined with anisotropic displacement parameters. All hydrogen atoms were placed in ideal positions and refined as riding atoms with relative isotropic displacement parameters. The final full matrix least squares refinement converged to  $R1 = 0.0619$  ( $F^2$ ,  $I > 2\sigma(I)$ ) and  $wR2 = 0.1470$  ( $F^2$ , all data).

### Structure description

The structure is the one suggested with all atoms in general positions.

### References

- <sup>1</sup> APEX2, version 2011.4-1; Bruker AXS: Madison, WI, 2011.
- <sup>2</sup> Sheldrick, G. M. *SADABS*, version 2008/1; University of Göttingen: Göttingen, Germany, 2008.
- <sup>3</sup> SAINT, version 7.68A; Bruker AXS: Madison, WI, 2009.
- <sup>4</sup> Altomare, A.; Burla, M. C.; Camalli, M.; Cascarano, G. L.; Giacovazzo, C.; Guagliardi, A.; Moliterni, A. G. G.; Polidori, G.; Spagna, R. *SIR97: A new program for solving and refining crystal structures*; Istituto di Cristallografia, CNR: Bari, Italy, 1999.
- <sup>5</sup> Sheldrick, G. M. *Acta. Cryst.* **2008**, A64, 112-122.

### Some equations of interest:

$$\begin{aligned}R_{\text{int}} &= \Sigma |F_o^2 - \langle F_o^2 \rangle| / \Sigma F_o^2 \\R1 &= \Sigma ||F_o| - |F_c|| / \Sigma |F_o| \\wR2 &= [\Sigma [w(F_o^2 - F_c^2)^2] / \Sigma [w(F_o^2)^2]]^{1/2} \\ \text{where } w &= 1 / [\sigma^2(F_o^2) + (aP)^2 + bP] \text{ and} \\ P &= 1/3 \max(0, F_o^2) + 2/3 F_c^2 \\ \text{Goof} = S &= [\Sigma [w(F_o^2 - F_c^2)^2] / (m-n)]^{1/2} \\ \text{where } m &= \text{number of reflections and } n = \text{number of parameters}\end{aligned}$$

**Table S49.** Crystal data and structure refinement for **6b**.

|                                                     |                                                               |                           |
|-----------------------------------------------------|---------------------------------------------------------------|---------------------------|
| Identification code                                 | <b>6b</b> , JONJK62                                           |                           |
| Empirical formula                                   | C <sub>23</sub> H <sub>21</sub> N O <sub>3</sub>              |                           |
| Formula weight                                      | 359.41                                                        |                           |
| Temperature                                         | 100.0(5) K                                                    |                           |
| Wavelength                                          | 0.71073 Å                                                     |                           |
| Crystal system                                      | Monoclinic                                                    |                           |
| Space group                                         | <i>P</i> 2 <sub>1</sub> / <i>c</i>                            |                           |
| Unit cell dimensions                                | <i>a</i> = 9.0505(18) Å                                       | $\alpha = 90^\circ$       |
|                                                     | <i>b</i> = 23.669(5) Å                                        | $\beta = 97.838(4)^\circ$ |
|                                                     | <i>c</i> = 8.6237(18) Å                                       | $\gamma = 90^\circ$       |
| Volume                                              | 1830.0(6) Å <sup>3</sup>                                      |                           |
| <i>Z</i>                                            | 4                                                             |                           |
| Density (calculated)                                | 1.304 Mg/m <sup>3</sup>                                       |                           |
| Absorption coefficient                              | 0.086 mm <sup>-1</sup>                                        |                           |
| <i>F</i> (000)                                      | 760                                                           |                           |
| Crystal color, morphology                           | pale yellow, plate                                            |                           |
| Crystal size                                        | 0.32 x 0.28 x 0.08 mm <sup>3</sup>                            |                           |
| Theta range for data collection                     | 1.72 to 27.48°                                                |                           |
| Index ranges                                        | -11 ≤ <i>h</i> ≤ 11, -30 ≤ <i>k</i> ≤ 30, -11 ≤ <i>l</i> ≤ 11 |                           |
| Reflections collected                               | 21409                                                         |                           |
| Independent reflections                             | 4191 [ <i>R</i> (int) = 0.0942]                               |                           |
| Observed reflections                                | 2558                                                          |                           |
| Completeness to theta = 27.48°                      | 99.9%                                                         |                           |
| Absorption correction                               | Multi-scan                                                    |                           |
| Max. and min. transmission                          | 0.9931 and 0.9729                                             |                           |
| Refinement method                                   | Full-matrix least-squares on <i>F</i> <sup>2</sup>            |                           |
| Data / restraints / parameters                      | 4191 / 0 / 247                                                |                           |
| Goodness-of-fit on <i>F</i> <sup>2</sup>            | 1.029                                                         |                           |
| Final <i>R</i> indices [ <i>I</i> > 2σ( <i>I</i> )] | <i>R</i> 1 = 0.0619, <i>wR</i> 2 = 0.1275                     |                           |
| <i>R</i> indices (all data)                         | <i>R</i> 1 = 0.1121, <i>wR</i> 2 = 0.1470                     |                           |
| Largest diff. peak and hole                         | 0.480 and -0.307 e.Å <sup>-3</sup>                            |                           |



**Table S50.** Atomic coordinates ( $\times 10^4$ ) and equivalent isotropic displacement parameters ( $\text{\AA}^2 \times 10^3$ ) for **6b**.  $U_{\text{eq}}$  is defined as one third of the trace of the orthogonalized  $U_{ij}$  tensor.

|     | x        | y        | z        | $U_{\text{eq}}$ |
|-----|----------|----------|----------|-----------------|
| O1  | 3386(2)  | 1548(1)  | 9184(2)  | 37(1)           |
| O2  | 2153(2)  | -864(1)  | 4586(2)  | 35(1)           |
| O3  | 6260(2)  | -15(1)   | 8013(2)  | 32(1)           |
| N1  | 1171(2)  | 459(1)   | 8394(2)  | 29(1)           |
| C1  | 2414(3)  | 1381(1)  | 8164(3)  | 31(1)           |
| C2  | 1201(3)  | 992(1)   | 8626(3)  | 28(1)           |
| C3  | 2279(3)  | 180(1)   | 7658(3)  | 26(1)           |
| C4  | 1757(3)  | -198(1)  | 6468(3)  | 28(1)           |
| C5  | 2768(3)  | -515(1)  | 5771(3)  | 28(1)           |
| C6  | 4295(3)  | -476(1)  | 6255(3)  | 29(1)           |
| C7  | 4789(3)  | -99(1)   | 7459(3)  | 28(1)           |
| C8  | 3796(3)  | 228(1)   | 8156(3)  | 28(1)           |
| C9  | 3131(3)  | -1227(1) | 3881(3)  | 33(1)           |
| C10 | 7316(3)  | -402(1)  | 7527(3)  | 34(1)           |
| C11 | 2334(3)  | 1549(1)  | 6506(3)  | 31(1)           |
| C12 | 1137(3)  | 1391(1)  | 5406(3)  | 33(1)           |
| C13 | 1070(3)  | 1565(1)  | 3865(3)  | 36(1)           |
| C14 | 2206(3)  | 1893(1)  | 3400(4)  | 38(1)           |
| C15 | 3396(3)  | 2054(1)  | 4490(4)  | 39(1)           |
| C16 | 3462(3)  | 1885(1)  | 6037(4)  | 37(1)           |
| C17 | 2(3)     | 1268(1)  | 9376(3)  | 28(1)           |
| C18 | -1108(3) | 941(1)   | 9915(3)  | 29(1)           |
| C19 | -2242(3) | 1193(1)  | 10572(3) | 30(1)           |
| C20 | -2303(3) | 1778(1)  | 10738(3) | 30(1)           |
| C21 | -1212(3) | 2102(1)  | 10188(3) | 35(1)           |
| C22 | -74(3)   | 1852(1)  | 9517(3)  | 32(1)           |
| C23 | -3486(3) | 2042(1)  | 11557(4) | 44(1)           |

**Table S51.** Bond lengths [Å] and angles [°] for **6b**.

|              |          |                 |            |
|--------------|----------|-----------------|------------|
| O(1)-C(1)    | 1.223(3) | C(16)-H(16A)    | 0.9500     |
| O(2)-C(5)    | 1.372(3) | C(17)-C(22)     | 1.390(3)   |
| O(2)-C(9)    | 1.427(3) | C(17)-C(18)     | 1.396(3)   |
| O(3)-C(7)    | 1.366(3) | C(18)-C(19)     | 1.375(3)   |
| O(3)-C(10)   | 1.427(3) | C(18)-H(18A)    | 0.9500     |
| N(1)-C(2)    | 1.276(3) | C(19)-C(20)     | 1.393(3)   |
| N(1)-C(3)    | 1.420(3) | C(19)-H(19A)    | 0.9500     |
| C(1)-C(11)   | 1.477(4) | C(20)-C(21)     | 1.384(4)   |
| C(1)-C(2)    | 1.526(3) | C(20)-C(23)     | 1.498(4)   |
| C(2)-C(17)   | 1.488(3) | C(21)-C(22)     | 1.383(4)   |
| C(3)-C(8)    | 1.386(3) | C(21)-H(21A)    | 0.9500     |
| C(3)-C(4)    | 1.395(3) | C(22)-H(22A)    | 0.9500     |
| C(4)-C(5)    | 1.382(3) | C(23)-H(23A)    | 0.9800     |
| C(4)-H(4A)   | 0.9500   | C(23)-H(23B)    | 0.9800     |
| C(5)-C(6)    | 1.392(3) | C(23)-H(23C)    | 0.9800     |
| C(6)-C(7)    | 1.396(3) | C(5)-O(2)-C(9)  | 117.89(19) |
| C(6)-H(6A)   | 0.9500   | C(7)-O(3)-C(10) | 117.70(19) |
| C(7)-C(8)    | 1.384(3) | C(2)-N(1)-C(3)  | 121.9(2)   |
| C(8)-H(8A)   | 0.9500   | O(1)-C(1)-C(11) | 123.0(2)   |
| C(9)-H(9A)   | 0.9800   | O(1)-C(1)-C(2)  | 118.7(2)   |
| C(9)-H(9B)   | 0.9800   | C(11)-C(1)-C(2) | 118.3(2)   |
| C(9)-H(9C)   | 0.9800   | N(1)-C(2)-C(17) | 120.0(2)   |
| C(10)-H(10A) | 0.9800   | N(1)-C(2)-C(1)  | 123.7(2)   |
| C(10)-H(10B) | 0.9800   | C(17)-C(2)-C(1) | 116.3(2)   |
| C(10)-H(10C) | 0.9800   | C(8)-C(3)-C(4)  | 120.1(2)   |
| C(11)-C(12)  | 1.390(4) | C(8)-C(3)-N(1)  | 123.6(2)   |
| C(11)-C(16)  | 1.397(4) | C(4)-C(3)-N(1)  | 116.0(2)   |
| C(12)-C(13)  | 1.385(4) | C(5)-C(4)-C(3)  | 119.4(2)   |
| C(12)-H(12A) | 0.9500   | C(5)-C(4)-H(4A) | 120.3      |
| C(13)-C(14)  | 1.390(4) | C(3)-C(4)-H(4A) | 120.3      |
| C(13)-H(13A) | 0.9500   | O(2)-C(5)-C(4)  | 115.2(2)   |
| C(14)-C(15)  | 1.383(4) | O(2)-C(5)-C(6)  | 123.3(2)   |
| C(14)-H(14A) | 0.9500   | C(4)-C(5)-C(6)  | 121.5(2)   |
| C(15)-C(16)  | 1.385(4) | C(5)-C(6)-C(7)  | 118.0(2)   |
| C(15)-H(15A) | 0.9500   | C(5)-C(6)-H(6A) | 121.0      |

|                     |          |                     |          |
|---------------------|----------|---------------------|----------|
| C(7)-C(6)-H(6A)     | 121.0    | C(14)-C(15)-C(16)   | 120.2(3) |
| O(3)-C(7)-C(8)      | 115.3(2) | C(14)-C(15)-H(15A)  | 119.9    |
| O(3)-C(7)-C(6)      | 123.4(2) | C(16)-C(15)-H(15A)  | 119.9    |
| C(8)-C(7)-C(6)      | 121.3(2) | C(15)-C(16)-C(11)   | 120.3(3) |
| C(7)-C(8)-C(3)      | 119.6(2) | C(15)-C(16)-H(16A)  | 119.8    |
| C(7)-C(8)-H(8A)     | 120.2    | C(11)-C(16)-H(16A)  | 119.8    |
| C(3)-C(8)-H(8A)     | 120.2    | C(22)-C(17)-C(18)   | 118.4(2) |
| O(2)-C(9)-H(9A)     | 109.5    | C(22)-C(17)-C(2)    | 121.4(2) |
| O(2)-C(9)-H(9B)     | 109.5    | C(18)-C(17)-C(2)    | 120.1(2) |
| H(9A)-C(9)-H(9B)    | 109.5    | C(19)-C(18)-C(17)   | 120.5(2) |
| O(2)-C(9)-H(9C)     | 109.5    | C(19)-C(18)-H(18A)  | 119.8    |
| H(9A)-C(9)-H(9C)    | 109.5    | C(17)-C(18)-H(18A)  | 119.8    |
| H(9B)-C(9)-H(9C)    | 109.5    | C(18)-C(19)-C(20)   | 121.1(2) |
| O(3)-C(10)-H(10A)   | 109.5    | C(18)-C(19)-H(19A)  | 119.4    |
| O(3)-C(10)-H(10B)   | 109.5    | C(20)-C(19)-H(19A)  | 119.4    |
| H(10A)-C(10)-H(10B) | 109.5    | C(21)-C(20)-C(19)   | 118.4(2) |
| O(3)-C(10)-H(10C)   | 109.5    | C(21)-C(20)-C(23)   | 121.3(2) |
| H(10A)-C(10)-H(10C) | 109.5    | C(19)-C(20)-C(23)   | 120.3(2) |
| H(10B)-C(10)-H(10C) | 109.5    | C(22)-C(21)-C(20)   | 120.8(2) |
| C(12)-C(11)-C(16)   | 119.2(3) | C(22)-C(21)-H(21A)  | 119.6    |
| C(12)-C(11)-C(1)    | 121.3(2) | C(20)-C(21)-H(21A)  | 119.6    |
| C(16)-C(11)-C(1)    | 119.5(2) | C(21)-C(22)-C(17)   | 120.7(2) |
| C(13)-C(12)-C(11)   | 120.2(3) | C(21)-C(22)-H(22A)  | 119.6    |
| C(13)-C(12)-H(12A)  | 119.9    | C(17)-C(22)-H(22A)  | 119.6    |
| C(11)-C(12)-H(12A)  | 119.9    | C(20)-C(23)-H(23A)  | 109.5    |
| C(12)-C(13)-C(14)   | 120.4(3) | C(20)-C(23)-H(23B)  | 109.5    |
| C(12)-C(13)-H(13A)  | 119.8    | H(23A)-C(23)-H(23B) | 109.5    |
| C(14)-C(13)-H(13A)  | 119.8    | C(20)-C(23)-H(23C)  | 109.5    |
| C(15)-C(14)-C(13)   | 119.7(3) | H(23A)-C(23)-H(23C) | 109.5    |
| C(15)-C(14)-H(14A)  | 120.2    | H(23B)-C(23)-H(23C) | 109.5    |
| C(13)-C(14)-H(14A)  | 120.2    |                     |          |

---

**Table S52.** Anisotropic displacement parameters ( $\text{\AA}^2 \times 10^3$ ) for **6b**. The anisotropic displacement factor exponent takes the form:  $-2\pi^2 [ h^2 a^{*2} U_{11} + \dots + 2 h k a^* b^* U_{12} ]$

|     | $U_{11}$ | $U_{22}$ | $U_{33}$ | $U_{23}$ | $U_{13}$ | $U_{12}$ |
|-----|----------|----------|----------|----------|----------|----------|
| O1  | 32(1)    | 33(1)    | 45(1)    | -5(1)    | -1(1)    | -5(1)    |
| O2  | 28(1)    | 39(1)    | 36(1)    | -9(1)    | 0(1)     | -1(1)    |
| O3  | 24(1)    | 30(1)    | 42(1)    | -6(1)    | 2(1)     | 0(1)     |
| N1  | 28(1)    | 28(1)    | 31(1)    | 1(1)     | 2(1)     | 1(1)     |
| C1  | 25(1)    | 24(1)    | 44(2)    | -4(1)    | 3(1)     | 3(1)     |
| C2  | 24(1)    | 28(1)    | 29(1)    | -1(1)    | 0(1)     | 0(1)     |
| C3  | 25(1)    | 23(1)    | 32(1)    | 3(1)     | 8(1)     | 2(1)     |
| C4  | 23(1)    | 28(1)    | 32(1)    | 4(1)     | 2(1)     | -2(1)    |
| C5  | 30(1)    | 25(1)    | 28(1)    | 3(1)     | 3(1)     | -4(1)    |
| C6  | 28(1)    | 27(1)    | 31(1)    | 2(1)     | 6(1)     | 1(1)     |
| C7  | 25(1)    | 24(1)    | 35(2)    | 5(1)     | 2(1)     | -1(1)    |
| C8  | 30(1)    | 24(1)    | 30(1)    | 1(1)     | 0(1)     | -3(1)    |
| C9  | 32(2)    | 32(1)    | 34(2)    | -4(1)    | 2(1)     | 3(1)     |
| C10 | 26(1)    | 35(1)    | 40(2)    | -2(1)    | 2(1)     | 4(1)     |
| C11 | 27(1)    | 25(1)    | 40(2)    | -2(1)    | 6(1)     | 0(1)     |
| C12 | 29(1)    | 26(1)    | 44(2)    | -3(1)    | 5(1)     | -2(1)    |
| C13 | 34(2)    | 32(1)    | 43(2)    | -2(1)    | 3(1)     | 2(1)     |
| C14 | 39(2)    | 29(1)    | 47(2)    | 2(1)     | 8(1)     | 2(1)     |
| C15 | 35(2)    | 33(1)    | 52(2)    | 4(1)     | 11(1)    | -4(1)    |
| C16 | 28(1)    | 33(1)    | 49(2)    | -3(1)    | 3(1)     | -3(1)    |
| C17 | 26(1)    | 28(1)    | 29(1)    | 1(1)     | -2(1)    | 2(1)     |
| C18 | 29(1)    | 26(1)    | 31(1)    | 1(1)     | 0(1)     | 0(1)     |
| C19 | 30(1)    | 31(1)    | 27(1)    | 3(1)     | 2(1)     | -2(1)    |
| C20 | 30(1)    | 32(1)    | 27(1)    | 0(1)     | 2(1)     | 2(1)     |
| C21 | 39(2)    | 24(1)    | 42(2)    | 0(1)     | 5(1)     | 1(1)     |
| C22 | 33(1)    | 29(1)    | 36(2)    | 3(1)     | 6(1)     | 0(1)     |
| C23 | 39(2)    | 43(2)    | 50(2)    | -1(1)    | 5(1)     | 4(1)     |

**Table S53.** Hydrogen coordinates ( $\times 10^4$ ) and isotropic displacement parameters ( $\text{\AA}^2 \times 10^3$ ) for **6b**.

|      | x     | y     | z     | $U_{\text{(eq)}}$ |
|------|-------|-------|-------|-------------------|
| H4A  | 717   | -238  | 6141  | 33                |
| H6A  | 4981  | -699  | 5780  | 34                |
| H8A  | 4152  | 484   | 8972  | 34                |
| H9A  | 2548  | -1461 | 3084  | 50                |
| H9B  | 3675  | -1470 | 4684  | 50                |
| H9C  | 3842  | -998  | 3391  | 50                |
| H10A | 8314  | -311  | 8060  | 51                |
| H10B | 7309  | -373  | 6393  | 51                |
| H10C | 7051  | -788  | 7795  | 51                |
| H12A | 363   | 1164  | 5713  | 40                |
| H13A | 243   | 1460  | 3121  | 44                |
| H14A | 2166  | 2006  | 2338  | 46                |
| H15A | 4171  | 2280  | 4178  | 47                |
| H16A | 4279  | 1999  | 6783  | 44                |
| H18A | -1079 | 541   | 9828  | 34                |
| H19A | -2997 | 965   | 10918 | 36                |
| H21A | -1247 | 2502  | 10274 | 42                |
| H22A | 665   | 2081  | 9147  | 39                |
| H23A | -4469 | 1914  | 11067 | 66                |
| H23B | -3426 | 2454  | 11478 | 66                |
| H23C | -3335 | 1931  | 12662 | 66                |

**Table S54.** Torsion angles [°] for **6b**.

---

|               |           |                 |           |
|---------------|-----------|-----------------|-----------|
| C3-N1-C2-C17  | 178.9(2)  | C2-C1-C11-C12   | 4.3(3)    |
| C3-N1-C2-C1   | -0.6(4)   | O1-C1-C11-C16   | 4.3(4)    |
| O1-C1-C2-N1   | -103.0(3) | C2-C1-C11-C16   | -177.4(2) |
| C11-C1-C2-N1  | 78.5(3)   | C16-C11-C12-C13 | 0.2(4)    |
| O1-C1-C2-C17  | 77.4(3)   | C1-C11-C12-C13  | 178.5(2)  |
| C11-C1-C2-C17 | -101.0(3) | C11-C12-C13-C14 | 0.7(4)    |
| C2-N1-C3-C8   | 53.5(3)   | C12-C13-C14-C15 | -1.1(4)   |
| C2-N1-C3-C4   | -132.6(2) | C13-C14-C15-C16 | 0.5(4)    |
| C8-C3-C4-C5   | -1.4(4)   | C14-C15-C16-C11 | 0.5(4)    |
| N1-C3-C4-C5   | -175.5(2) | C12-C11-C16-C15 | -0.8(4)   |
| C9-O2-C5-C4   | -176.4(2) | C1-C11-C16-C15  | -179.1(2) |
| C9-O2-C5-C6   | 3.6(3)    | N1-C2-C17-C22   | -174.0(2) |
| C3-C4-C5-O2   | -178.3(2) | C1-C2-C17-C22   | 5.5(4)    |
| C3-C4-C5-C6   | 1.7(4)    | N1-C2-C17-C18   | 4.0(4)    |
| O2-C5-C6-C7   | 179.0(2)  | C1-C2-C17-C18   | -176.5(2) |
| C4-C5-C6-C7   | -0.9(4)   | C22-C17-C18-C19 | -0.2(4)   |
| C10-O3-C7-C8  | 170.0(2)  | C2-C17-C18-C19  | -178.3(2) |
| C10-O3-C7-C6  | -11.3(3)  | C17-C18-C19-C20 | -1.0(4)   |
| C5-C6-C7-O3   | -178.7(2) | C18-C19-C20-C21 | 1.6(4)    |
| C5-C6-C7-C8   | 0.0(4)    | C18-C19-C20-C23 | -175.7(2) |
| O3-C7-C8-C3   | 179.0(2)  | C19-C20-C21-C22 | -1.2(4)   |
| C6-C7-C8-C3   | 0.2(4)    | C23-C20-C21-C22 | 176.1(3)  |
| C4-C3-C8-C7   | 0.5(4)    | C20-C21-C22-C17 | 0.0(4)    |
| N1-C3-C8-C7   | 174.1(2)  | C18-C17-C22-C21 | 0.6(4)    |
| O1-C1-C11-C12 | -174.0(2) | C2-C17-C22-C21  | 178.7(2)  |

---

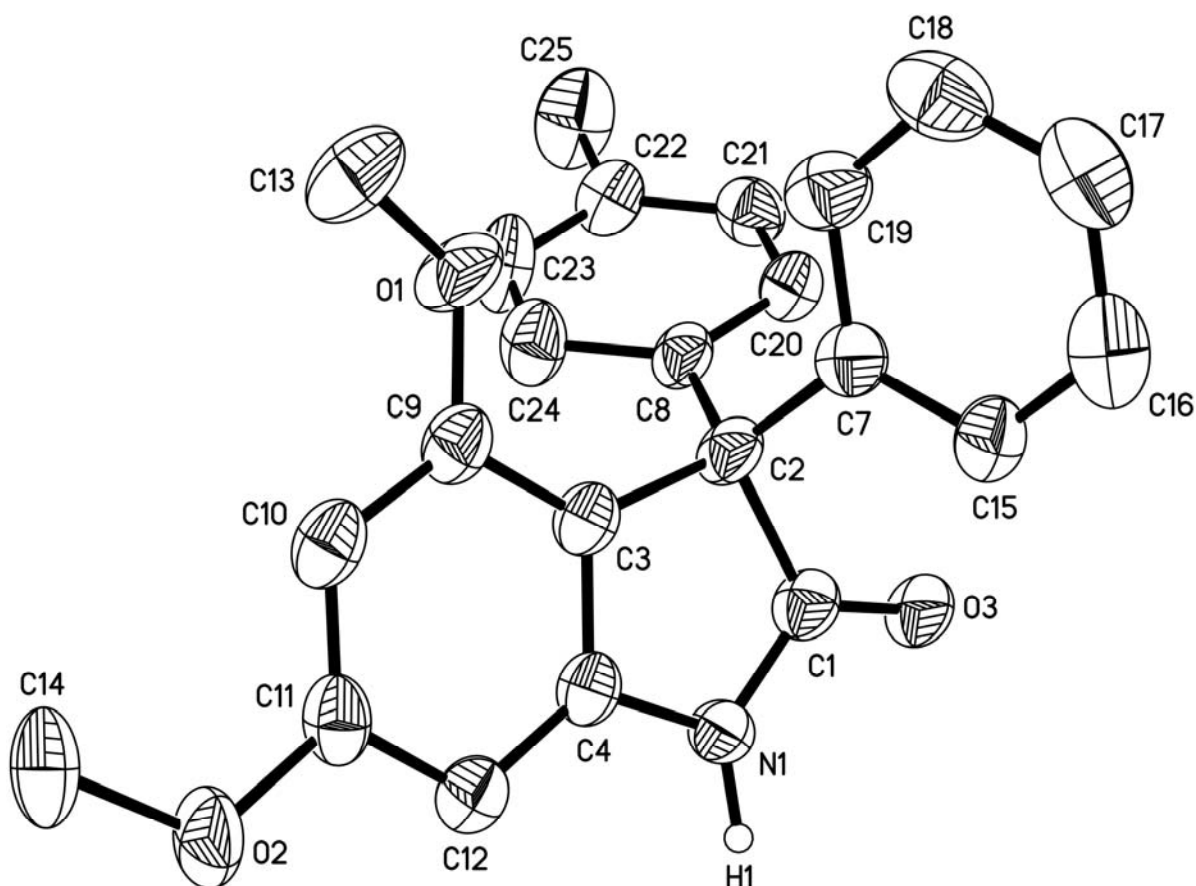

**Figure S63.** ORTEP diagram of **7** with thermal ellipsoids drawn at 50% probability level. Hydrogen atoms were omitted for clarity, except for H1, to emphasize valency of the nitrogen atom.

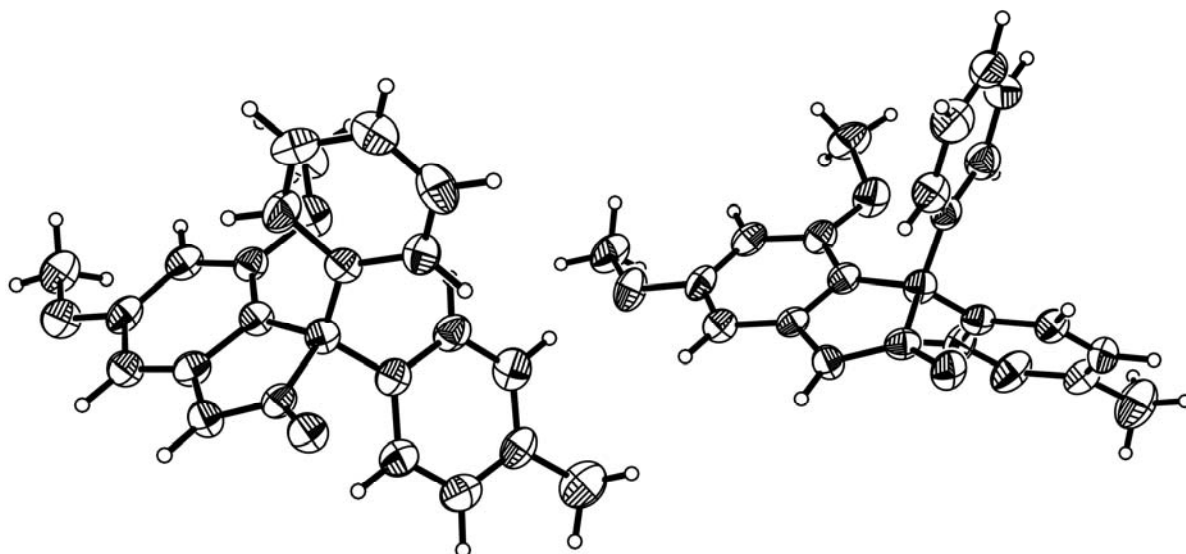

**Figure S64.** ORTEP diagram of asymmetric unit of **7** with thermal ellipsoids drawn at 50% probability level.

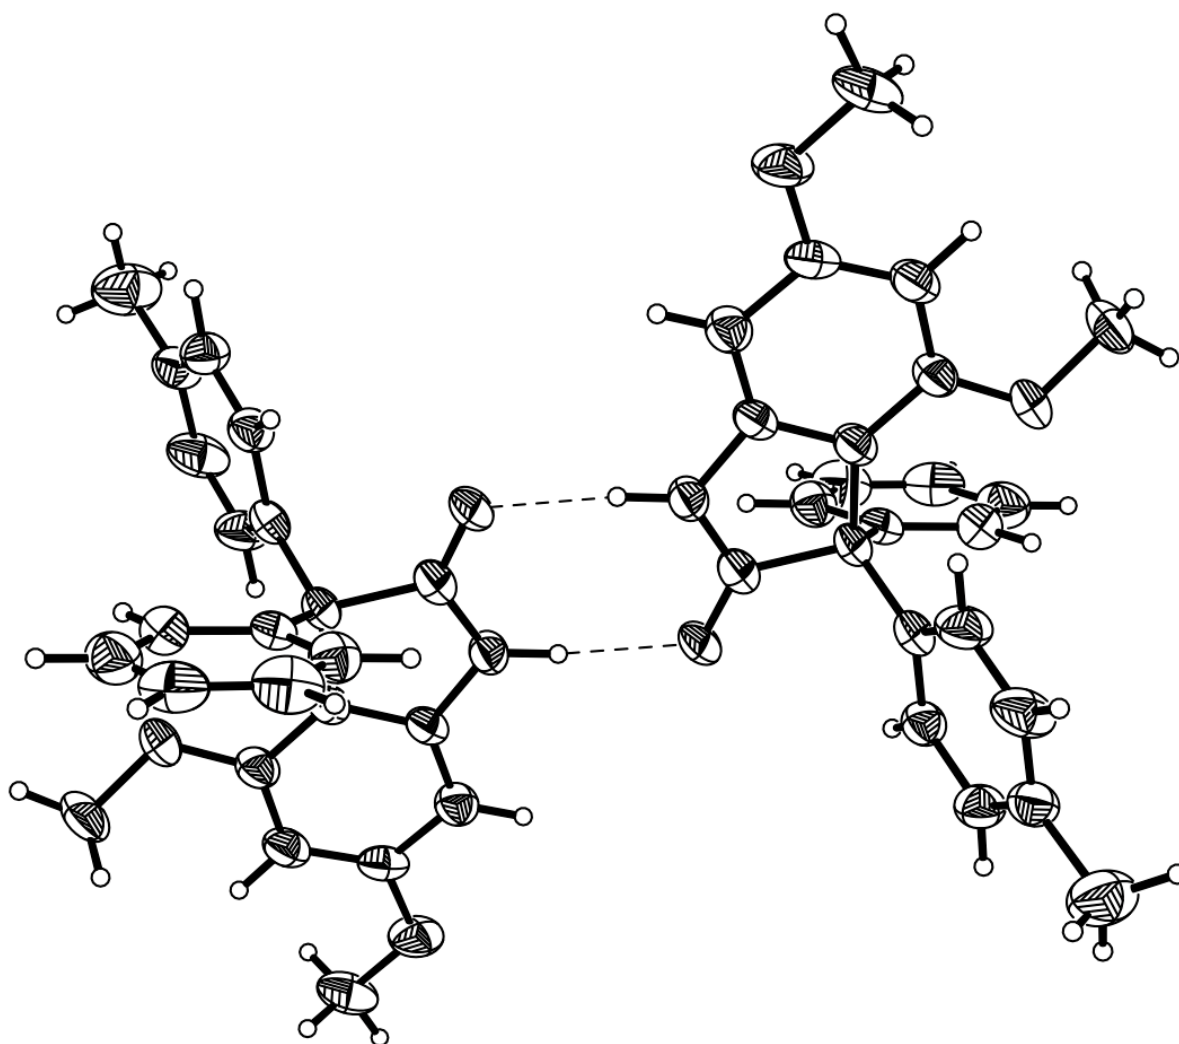

**Figure S65.** ORTEP diagram of (+/-)-7 showing intermolecular hydrogen bonding with thermal ellipsoids drawn at 50% probability level.



## Experimental Details for the Structure Determination of (+/-)-7.

### Data collection

A crystal (0.26 x 0.12 x 0.08 mm<sup>3</sup>) was placed onto the tip of a 0.1 mm diameter glass capillary tube or fiber and mounted on a Bruker SMART APEX II CCD Platform diffractometer for a data collection at 173.0(5) K.<sup>1</sup> A preliminary set of cell constants and an orientation matrix were calculated from reflections harvested from three orthogonal wedges of reciprocal space. The full data collection was carried out using MoK $\alpha$  radiation (graphite monochromator) with a frame time of 90 seconds and a detector distance of 3.98 cm. A randomly oriented region of reciprocal space was surveyed: four major sections of frames were collected with 0.50° steps in  $\omega$  at four different  $\phi$  settings and a detector position of -38° in  $2\theta$ . The intensity data were corrected for absorption.<sup>2</sup> Final cell constants were calculated from the xyz centroids of 1741 strong reflections from the actual data collection after integration.<sup>3</sup> See Table S55 for additional crystal and refinement information.

### Structure solution and refinement

The structure was solved using SIR97<sup>4</sup> and refined using SHELXL-97.<sup>5</sup> The space group *P*-1 was determined based on intensity statistics. A direct-methods solution was calculated which provided most non-hydrogen atoms from the E-map. Full-matrix least squares / difference Fourier cycles were performed which located the remaining non-hydrogen atoms. All non-hydrogen atoms were refined with anisotropic displacement parameters. The amine hydrogen atoms were found from the difference Fourier map, and their positional and isotropic displacement parameters were refined independently from those of their bonded nitrogen atoms. All other hydrogen atoms were placed in ideal positions and refined as riding atoms with relative isotropic displacement parameters. The final full matrix least squares refinement converged to  $R1 = 0.0663$  ( $F^2$ ,  $I > 2\sigma(I)$ ) and  $wR2 = 0.1646$  ( $F^2$ , all data).

### Structure description

The structure is the one suggested. There are two independent molecules in the asymmetric unit with all atoms in general positions. Moderate intermolecular hydrogen bonding is observed: each molecule is hydrogen-bonded to its inverted symmetry equivalent (see Figure S65 and Table S61).

### References

- <sup>1</sup> APEX2, version 2011.4-1; Bruker AXS: Madison, WI, 2011.
- <sup>2</sup> Sheldrick, G. M. *SADABS*, version 2008/1; University of Göttingen: Göttingen, Germany, 2008.
- <sup>3</sup> SAINTE, version 7.68A; Bruker AXS: Madison, WI, 2009.
- <sup>4</sup> Altomare, A.; Burla, M. C.; Camalli, M.; Cascarano, G. L.; Giacovazzo, C.; Guagliardi, A.; Moliterni, A. G. G.; Polidori, G.; Spagna, R. *SIR97: A new program for solving and refining crystal structures*; Istituto di Cristallografia, CNR: Bari, Italy, 1999.
- <sup>5</sup> Sheldrick, G. M. *Acta. Cryst.* **2008**, *A64*, 112-122.

### Some equations of interest:

$$R_{\text{int}} = \frac{\sum |F_o|^2 - \langle F_o^2 \rangle}{\sum |F_o|^2}$$
$$R1 = \frac{\sum ||F_o| - |F_c||}{\sum |F_o|}$$
$$wR2 = \frac{[\sum [w(F_o^2 - F_c^2)^2]]}{\sum [w(F_o^2)^2]}^{1/2}$$

where  $w = 1 / [\sigma^2(F_o^2) + (aP)^2 + bP]$  and  
 $P = 1/3 \max(0, F_o^2) + 2/3 F_c^2$   
 $\text{GooF} = S = \frac{[\sum [w(F_o^2 - F_c^2)^2]]}{(m-n)}^{1/2}$   
where  $m$  = number of reflections and  $n$  = number of parameters

**Table S55.** Crystal data and structure refinement for (+/-)-7.

|                                                     |                                                             |                       |
|-----------------------------------------------------|-------------------------------------------------------------|-----------------------|
| Identification code                                 | (±)-7, JONJK61                                              |                       |
| Empirical formula                                   | C <sub>23</sub> H <sub>21</sub> N O <sub>3</sub>            |                       |
| Formula weight                                      | 359.41                                                      |                       |
| Temperature                                         | 173.0(5) K                                                  |                       |
| Wavelength                                          | 0.71073 Å                                                   |                       |
| Crystal system                                      | Triclinic                                                   |                       |
| Space group                                         | <i>P</i> -1                                                 |                       |
| Unit cell dimensions                                | <i>a</i> = 8.2312(16) Å                                     | $\alpha$ = 81.845(4)° |
|                                                     | <i>b</i> = 9.912(2) Å                                       | $\beta$ = 87.012(4)°  |
|                                                     | <i>c</i> = 23.000(5) Å                                      | $\gamma$ = 89.587(3)° |
| Volume                                              | 1854.9(6) Å <sup>3</sup>                                    |                       |
| <i>Z</i>                                            | 4                                                           |                       |
| Density (calculated)                                | 1.287 Mg/m <sup>3</sup>                                     |                       |
| Absorption coefficient                              | 0.085 mm <sup>-1</sup>                                      |                       |
| <i>F</i> (000)                                      | 760                                                         |                       |
| Crystal color, morphology                           | colorless, block                                            |                       |
| Crystal size                                        | 0.26 x 0.12 x 0.08 mm <sup>3</sup>                          |                       |
| Theta range for data collection                     | 1.79 to 25.03°                                              |                       |
| Index ranges                                        | -9 ≤ <i>h</i> ≤ 9, -11 ≤ <i>k</i> ≤ 11, -27 ≤ <i>l</i> ≤ 27 |                       |
| Reflections collected                               | 16814                                                       |                       |
| Independent reflections                             | 6550 [ <i>R</i> (int) = 0.1103]                             |                       |
| Observed reflections                                | 2958                                                        |                       |
| Completeness to theta = 25.03°                      | 99.8%                                                       |                       |
| Absorption correction                               | Multi-scan                                                  |                       |
| Max. and min. transmission                          | 0.9932 and 0.9782                                           |                       |
| Refinement method                                   | Full-matrix least-squares on <i>F</i> <sup>2</sup>          |                       |
| Data / restraints / parameters                      | 6550 / 0 / 502                                              |                       |
| Goodness-of-fit on <i>F</i> <sup>2</sup>            | 0.961                                                       |                       |
| Final <i>R</i> indices [ <i>I</i> > 2σ( <i>I</i> )] | <i>R</i> 1 = 0.0663, <i>wR</i> 2 = 0.1259                   |                       |
| <i>R</i> indices (all data)                         | <i>R</i> 1 = 0.1722, <i>wR</i> 2 = 0.1646                   |                       |
| Extinction coefficient                              | 0.0050(8)                                                   |                       |
| Largest diff. peak and hole                         | 0.306 and -0.230 e.Å <sup>-3</sup>                          |                       |

**Table S56.** Atomic coordinates ( $\times 10^4$ ) and equivalent isotropic displacement parameters ( $\text{\AA}^2 \times 10^3$ ) for (+/-)-7.  $U_{\text{eq}}$  is defined as one third of the trace of the orthogonalized  $U_{ij}$  tensor.

|     | x        | y        | z        | $U_{\text{eq}}$ |
|-----|----------|----------|----------|-----------------|
| O1  | 9197(3)  | 9594(3)  | 3540(1)  | 49(1)           |
| O2  | 7345(4)  | 10864(3) | 5424(1)  | 49(1)           |
| O3  | 5793(3)  | 4894(2)  | 4245(1)  | 41(1)           |
| N1  | 5923(4)  | 6636(3)  | 4790(2)  | 35(1)           |
| C1  | 6268(5)  | 6018(4)  | 4312(2)  | 36(1)           |
| C2  | 7370(5)  | 6966(4)  | 3870(2)  | 34(1)           |
| C3  | 7546(5)  | 8167(4)  | 4206(2)  | 34(1)           |
| C4  | 6689(5)  | 7911(4)  | 4744(2)  | 32(1)           |
| C7  | 9007(5)  | 6274(4)  | 3783(2)  | 35(1)           |
| C8  | 6490(5)  | 7303(4)  | 3297(2)  | 34(1)           |
| C9  | 8396(5)  | 9383(4)  | 4077(2)  | 38(1)           |
| C10 | 8367(5)  | 10296(4) | 4480(2)  | 40(1)           |
| C11 | 7473(5)  | 10001(4) | 5003(2)  | 38(1)           |
| C12 | 6620(5)  | 8783(4)  | 5154(2)  | 38(1)           |
| C13 | 10465(5) | 10586(4) | 3439(2)  | 56(1)           |
| C14 | 8082(5)  | 12174(4) | 5286(2)  | 54(1)           |
| C15 | 9556(5)  | 5217(4)  | 4185(2)  | 42(1)           |
| C16 | 11066(6) | 4658(5)  | 4113(2)  | 58(1)           |
| C17 | 12109(6) | 5137(5)  | 3644(2)  | 55(1)           |
| C18 | 11581(6) | 6185(5)  | 3238(2)  | 55(1)           |
| C19 | 10058(5) | 6744(4)  | 3303(2)  | 45(1)           |
| C20 | 6352(5)  | 6324(4)  | 2927(2)  | 37(1)           |
| C21 | 5565(5)  | 6612(4)  | 2407(2)  | 42(1)           |
| C22 | 4918(5)  | 7887(4)  | 2234(2)  | 43(1)           |
| C23 | 5024(5)  | 8840(4)  | 2606(2)  | 54(1)           |
| C24 | 5789(5)  | 8573(4)  | 3128(2)  | 48(1)           |
| C25 | 4118(6)  | 8214(5)  | 1655(2)  | 73(2)           |
| O4  | 9618(3)  | 8865(3)  | 8351(1)  | 46(1)           |
| O5  | 7598(3)  | 10974(3) | 10027(1) | 48(1)           |
| O6  | 5699(3)  | 4594(2)  | 9275(1)  | 40(1)           |
| N2  | 5844(4)  | 6578(3)  | 9674(2)  | 36(1)           |
| C31 | 6200(5)  | 5765(4)  | 9264(2)  | 33(1)           |
| C32 | 7324(5)  | 6539(4)  | 8767(2)  | 33(1)           |

|     |          |          |         |       |
|-----|----------|----------|---------|-------|
| C33 | 7642(5)  | 7834(4)  | 9026(2) | 33(1) |
| C34 | 6713(5)  | 7818(4)  | 9546(2) | 35(1) |
| C37 | 8813(5)  | 5637(4)  | 8719(2) | 33(1) |
| C38 | 6341(5)  | 6838(4)  | 8217(2) | 36(1) |
| C39 | 8675(5)  | 8914(4)  | 8851(2) | 35(1) |
| C40 | 8713(5)  | 9984(4)  | 9187(2) | 38(1) |
| C41 | 7691(5)  | 9952(4)  | 9688(2) | 39(1) |
| C42 | 6689(5)  | 8849(4)  | 9883(2) | 38(1) |
| C43 | 10856(6) | 9862(4)  | 8202(2) | 70(2) |
| C44 | 8500(5)  | 12187(4) | 9832(2) | 50(1) |
| C45 | 9971(5)  | 5597(4)  | 9132(2) | 46(1) |
| C46 | 11268(5) | 4728(5)  | 9136(2) | 50(1) |
| C47 | 11477(6) | 3867(5)  | 8717(2) | 51(1) |
| C48 | 10337(6) | 3898(4)  | 8305(2) | 54(1) |
| C49 | 9015(5)  | 4759(4)  | 8302(2) | 43(1) |
| C50 | 7107(5)  | 7215(4)  | 7663(2) | 42(1) |
| C51 | 6213(6)  | 7480(4)  | 7172(2) | 45(1) |
| C52 | 4545(6)  | 7388(4)  | 7198(2) | 42(1) |
| C53 | 3778(5)  | 7046(4)  | 7747(2) | 47(1) |
| C54 | 4663(5)  | 6781(4)  | 8244(2) | 45(1) |
| C55 | 3598(6)  | 7620(5)  | 6664(2) | 65(2) |

---

**Table S57.** Bond lengths [Å] and angles [°] for (+/-)-7.

|              |          |              |          |
|--------------|----------|--------------|----------|
| O(1)-C(9)    | 1.360(5) | C(17)-H(17A) | 0.9500   |
| O(1)-C(13)   | 1.426(4) | C(18)-C(19)  | 1.376(6) |
| O(2)-C(11)   | 1.378(5) | C(18)-H(18A) | 0.9500   |
| O(2)-C(14)   | 1.425(4) | C(19)-H(19B) | 0.9500   |
| O(3)-C(1)    | 1.216(4) | C(20)-C(21)  | 1.383(5) |
| N(1)-C(1)    | 1.349(5) | C(20)-H(20A) | 0.9500   |
| N(1)-C(4)    | 1.404(4) | C(21)-C(22)  | 1.382(5) |
| N(1)-H(1)    | 0.94(4)  | C(21)-H(21A) | 0.9500   |
| C(1)-C(2)    | 1.544(5) | C(22)-C(23)  | 1.369(6) |
| C(2)-C(3)    | 1.521(5) | C(22)-C(25)  | 1.509(6) |
| C(2)-C(7)    | 1.524(5) | C(23)-C(24)  | 1.376(6) |
| C(2)-C(8)    | 1.532(5) | C(23)-H(23B) | 0.9500   |
| C(3)-C(4)    | 1.382(5) | C(24)-H(24B) | 0.9500   |
| C(3)-C(9)    | 1.385(5) | C(25)-H(25A) | 0.9800   |
| C(4)-C(12)   | 1.366(5) | C(25)-H(25B) | 0.9800   |
| C(7)-C(15)   | 1.386(5) | C(25)-H(25C) | 0.9800   |
| C(7)-C(19)   | 1.394(5) | O(4)-C(39)   | 1.360(4) |
| C(8)-C(20)   | 1.386(5) | O(4)-C(43)   | 1.420(4) |
| C(8)-C(24)   | 1.394(5) | O(5)-C(41)   | 1.364(4) |
| C(9)-C(10)   | 1.383(5) | O(5)-C(44)   | 1.423(4) |
| C(10)-C(11)  | 1.373(5) | O(6)-C(31)   | 1.231(4) |
| C(10)-H(10A) | 0.9500   | N(2)-C(31)   | 1.346(5) |
| C(11)-C(12)  | 1.393(5) | N(2)-C(34)   | 1.413(5) |
| C(12)-H(12A) | 0.9500   | N(2)-H(2)    | 0.93(4)  |
| C(13)-H(13A) | 0.9800   | C(31)-C(32)  | 1.549(5) |
| C(13)-H(13B) | 0.9800   | C(32)-C(33)  | 1.519(5) |
| C(13)-H(13C) | 0.9800   | C(32)-C(37)  | 1.521(5) |
| C(14)-H(14A) | 0.9800   | C(32)-C(38)  | 1.530(5) |
| C(14)-H(14B) | 0.9800   | C(33)-C(39)  | 1.373(5) |
| C(14)-H(14C) | 0.9800   | C(33)-C(34)  | 1.384(5) |
| C(15)-C(16)  | 1.369(6) | C(34)-C(42)  | 1.368(5) |
| C(15)-H(15A) | 0.9500   | C(37)-C(45)  | 1.376(5) |
| C(16)-C(17)  | 1.374(6) | C(37)-C(49)  | 1.387(5) |
| C(16)-H(16A) | 0.9500   | C(38)-C(54)  | 1.380(5) |
| C(17)-C(18)  | 1.379(6) | C(38)-C(50)  | 1.393(5) |

|                  |          |                     |          |
|------------------|----------|---------------------|----------|
| C(39)-C(40)      | 1.400(5) | O(3)-C(1)-N(1)      | 125.2(4) |
| C(40)-C(41)      | 1.386(5) | O(3)-C(1)-C(2)      | 126.0(4) |
| C(40)-H(40A)     | 0.9500   | N(1)-C(1)-C(2)      | 108.8(3) |
| C(41)-C(42)      | 1.383(5) | C(3)-C(2)-C(7)      | 110.8(3) |
| C(42)-H(42A)     | 0.9500   | C(3)-C(2)-C(8)      | 114.3(3) |
| C(43)-H(43A)     | 0.9800   | C(7)-C(2)-C(8)      | 112.7(3) |
| C(43)-H(43B)     | 0.9800   | C(3)-C(2)-C(1)      | 100.6(3) |
| C(43)-H(43C)     | 0.9800   | C(7)-C(2)-C(1)      | 109.3(3) |
| C(44)-H(44A)     | 0.9800   | C(8)-C(2)-C(1)      | 108.4(3) |
| C(44)-H(44B)     | 0.9800   | C(4)-C(3)-C(9)      | 117.9(4) |
| C(44)-H(44C)     | 0.9800   | C(4)-C(3)-C(2)      | 109.7(3) |
| C(45)-C(46)      | 1.366(6) | C(9)-C(3)-C(2)      | 132.4(4) |
| C(45)-H(45A)     | 0.9500   | C(12)-C(4)-C(3)     | 124.2(3) |
| C(46)-C(47)      | 1.377(6) | C(12)-C(4)-N(1)     | 126.7(4) |
| C(46)-H(46A)     | 0.9500   | C(3)-C(4)-N(1)      | 109.1(3) |
| C(47)-C(48)      | 1.367(6) | C(15)-C(7)-C(19)    | 117.2(4) |
| C(47)-H(47A)     | 0.9500   | C(15)-C(7)-C(2)     | 122.4(4) |
| C(48)-C(49)      | 1.378(6) | C(19)-C(7)-C(2)     | 120.4(4) |
| C(48)-H(48A)     | 0.9500   | C(20)-C(8)-C(24)    | 117.6(4) |
| C(49)-H(49A)     | 0.9500   | C(20)-C(8)-C(2)     | 120.1(3) |
| C(50)-C(51)      | 1.373(5) | C(24)-C(8)-C(2)     | 122.4(3) |
| C(50)-H(50A)     | 0.9500   | O(1)-C(9)-C(10)     | 124.5(3) |
| C(51)-C(52)      | 1.374(6) | O(1)-C(9)-C(3)      | 115.6(4) |
| C(51)-H(51A)     | 0.9500   | C(10)-C(9)-C(3)     | 119.9(4) |
| C(52)-C(53)      | 1.382(6) | C(11)-C(10)-C(9)    | 119.8(4) |
| C(52)-C(55)      | 1.478(6) | C(11)-C(10)-H(10A)  | 120.1    |
| C(53)-C(54)      | 1.380(6) | C(9)-C(10)-H(10A)   | 120.1    |
| C(53)-H(53A)     | 0.9500   | C(10)-C(11)-O(2)    | 123.7(3) |
| C(54)-H(54A)     | 0.9500   | C(10)-C(11)-C(12)   | 122.1(4) |
| C(55)-H(55A)     | 0.9800   | O(2)-C(11)-C(12)    | 114.2(4) |
| C(55)-H(55B)     | 0.9800   | C(4)-C(12)-C(11)    | 116.0(4) |
| C(55)-H(55C)     | 0.9800   | C(4)-C(12)-H(12A)   | 122.0    |
| C(9)-O(1)-C(13)  | 118.7(3) | C(11)-C(12)-H(12A)  | 122.0    |
| C(11)-O(2)-C(14) | 117.8(3) | O(1)-C(13)-H(13A)   | 109.5    |
| C(1)-N(1)-C(4)   | 111.8(3) | O(1)-C(13)-H(13B)   | 109.5    |
| C(1)-N(1)-H(1)   | 127(2)   | H(13A)-C(13)-H(13B) | 109.5    |
| C(4)-N(1)-H(1)   | 121(2)   | O(1)-C(13)-H(13C)   | 109.5    |

|                     |          |                     |          |
|---------------------|----------|---------------------|----------|
| H(13A)-C(13)-H(13C) | 109.5    | C(8)-C(24)-H(24B)   | 119.7    |
| H(13B)-C(13)-H(13C) | 109.5    | C(22)-C(25)-H(25A)  | 109.5    |
| O(2)-C(14)-H(14A)   | 109.5    | C(22)-C(25)-H(25B)  | 109.5    |
| O(2)-C(14)-H(14B)   | 109.5    | H(25A)-C(25)-H(25B) | 109.5    |
| H(14A)-C(14)-H(14B) | 109.5    | C(22)-C(25)-H(25C)  | 109.5    |
| O(2)-C(14)-H(14C)   | 109.5    | H(25A)-C(25)-H(25C) | 109.5    |
| H(14A)-C(14)-H(14C) | 109.5    | H(25B)-C(25)-H(25C) | 109.5    |
| H(14B)-C(14)-H(14C) | 109.5    | C(39)-O(4)-C(43)    | 118.1(3) |
| C(16)-C(15)-C(7)    | 121.3(4) | C(41)-O(5)-C(44)    | 118.2(3) |
| C(16)-C(15)-H(15A)  | 119.4    | C(31)-N(2)-C(34)    | 110.7(4) |
| C(7)-C(15)-H(15A)   | 119.4    | C(31)-N(2)-H(2)     | 128(2)   |
| C(15)-C(16)-C(17)   | 121.5(5) | C(34)-N(2)-H(2)     | 121(2)   |
| C(15)-C(16)-H(16A)  | 119.3    | O(6)-C(31)-N(2)     | 125.6(4) |
| C(17)-C(16)-H(16A)  | 119.3    | O(6)-C(31)-C(32)    | 125.0(4) |
| C(16)-C(17)-C(18)   | 118.0(5) | N(2)-C(31)-C(32)    | 109.4(3) |
| C(16)-C(17)-H(17A)  | 121.0    | C(33)-C(32)-C(37)   | 114.0(3) |
| C(18)-C(17)-H(17A)  | 121.0    | C(33)-C(32)-C(38)   | 111.1(3) |
| C(19)-C(18)-C(17)   | 121.0(5) | C(37)-C(32)-C(38)   | 116.3(3) |
| C(19)-C(18)-H(18A)  | 119.5    | C(33)-C(32)-C(31)   | 100.5(3) |
| C(17)-C(18)-H(18A)  | 119.5    | C(37)-C(32)-C(31)   | 105.5(3) |
| C(18)-C(19)-C(7)    | 121.0(4) | C(38)-C(32)-C(31)   | 107.8(3) |
| C(18)-C(19)-H(19B)  | 119.5    | C(39)-C(33)-C(34)   | 118.3(3) |
| C(7)-C(19)-H(19B)   | 119.5    | C(39)-C(33)-C(32)   | 132.4(4) |
| C(21)-C(20)-C(8)    | 120.8(4) | C(34)-C(33)-C(32)   | 109.2(3) |
| C(21)-C(20)-H(20A)  | 119.6    | C(42)-C(34)-C(33)   | 124.1(4) |
| C(8)-C(20)-H(20A)   | 119.6    | C(42)-C(34)-N(2)    | 126.1(4) |
| C(22)-C(21)-C(20)   | 121.3(4) | C(33)-C(34)-N(2)    | 109.8(3) |
| C(22)-C(21)-H(21A)  | 119.3    | C(45)-C(37)-C(49)   | 117.3(4) |
| C(20)-C(21)-H(21A)  | 119.3    | C(45)-C(37)-C(32)   | 119.4(4) |
| C(23)-C(22)-C(21)   | 117.6(4) | C(49)-C(37)-C(32)   | 123.1(4) |
| C(23)-C(22)-C(25)   | 121.2(4) | C(54)-C(38)-C(50)   | 116.8(4) |
| C(21)-C(22)-C(25)   | 121.2(4) | C(54)-C(38)-C(32)   | 122.0(4) |
| C(22)-C(23)-C(24)   | 122.1(4) | C(50)-C(38)-C(32)   | 121.1(4) |
| C(22)-C(23)-H(23B)  | 119.0    | O(4)-C(39)-C(33)    | 116.6(3) |
| C(24)-C(23)-H(23B)  | 119.0    | O(4)-C(39)-C(40)    | 123.8(3) |
| C(23)-C(24)-C(8)    | 120.5(4) | C(33)-C(39)-C(40)   | 119.6(4) |
| C(23)-C(24)-H(24B)  | 119.7    | C(41)-C(40)-C(39)   | 119.7(3) |

|                     |          |                     |          |
|---------------------|----------|---------------------|----------|
| C(41)-C(40)-H(40A)  | 120.1    | C(46)-C(47)-H(47A)  | 121.1    |
| C(39)-C(40)-H(40A)  | 120.1    | C(47)-C(48)-C(49)   | 121.6(4) |
| O(5)-C(41)-C(42)    | 114.8(4) | C(47)-C(48)-H(48A)  | 119.2    |
| O(5)-C(41)-C(40)    | 123.7(3) | C(49)-C(48)-H(48A)  | 119.2    |
| C(42)-C(41)-C(40)   | 121.6(4) | C(48)-C(49)-C(37)   | 120.5(4) |
| C(34)-C(42)-C(41)   | 116.6(4) | C(48)-C(49)-H(49A)  | 119.7    |
| C(34)-C(42)-H(42A)  | 121.7    | C(37)-C(49)-H(49A)  | 119.7    |
| C(41)-C(42)-H(42A)  | 121.7    | C(51)-C(50)-C(38)   | 120.7(4) |
| O(4)-C(43)-H(43A)   | 109.5    | C(51)-C(50)-H(50A)  | 119.7    |
| O(4)-C(43)-H(43B)   | 109.5    | C(38)-C(50)-H(50A)  | 119.7    |
| H(43A)-C(43)-H(43B) | 109.5    | C(50)-C(51)-C(52)   | 122.5(4) |
| O(4)-C(43)-H(43C)   | 109.5    | C(50)-C(51)-H(51A)  | 118.8    |
| H(43A)-C(43)-H(43C) | 109.5    | C(52)-C(51)-H(51A)  | 118.8    |
| H(43B)-C(43)-H(43C) | 109.5    | C(51)-C(52)-C(53)   | 117.1(4) |
| O(5)-C(44)-H(44A)   | 109.5    | C(51)-C(52)-C(55)   | 122.1(4) |
| O(5)-C(44)-H(44B)   | 109.5    | C(53)-C(52)-C(55)   | 120.8(4) |
| H(44A)-C(44)-H(44B) | 109.5    | C(54)-C(53)-C(52)   | 121.0(4) |
| O(5)-C(44)-H(44C)   | 109.5    | C(54)-C(53)-H(53A)  | 119.5    |
| H(44A)-C(44)-H(44C) | 109.5    | C(52)-C(53)-H(53A)  | 119.5    |
| H(44B)-C(44)-H(44C) | 109.5    | C(53)-C(54)-C(38)   | 121.9(4) |
| C(46)-C(45)-C(37)   | 121.8(4) | C(53)-C(54)-H(54A)  | 119.0    |
| C(46)-C(45)-H(45A)  | 119.1    | C(38)-C(54)-H(54A)  | 119.0    |
| C(37)-C(45)-H(45A)  | 119.1    | C(52)-C(55)-H(55A)  | 109.5    |
| C(45)-C(46)-C(47)   | 120.9(4) | C(52)-C(55)-H(55B)  | 109.5    |
| C(45)-C(46)-H(46A)  | 119.6    | H(55A)-C(55)-H(55B) | 109.5    |
| C(47)-C(46)-H(46A)  | 119.6    | C(52)-C(55)-H(55C)  | 109.5    |
| C(48)-C(47)-C(46)   | 117.9(4) | H(55A)-C(55)-H(55C) | 109.5    |
| C(48)-C(47)-H(47A)  | 121.1    | H(55B)-C(55)-H(55C) | 109.5    |

---



**Table S58.** Anisotropic displacement parameters ( $\text{\AA}^2 \times 10^3$ ) for (+/-)-7. The anisotropic displacement factor exponent takes the form:  $-2\pi^2 [ h^2 a^{*2} U_{11} + \dots + 2 h k a^* b^* U_{12} ]$

|     | U <sub>11</sub> | U <sub>22</sub> | U <sub>33</sub> | U <sub>23</sub> | U <sub>13</sub> | U <sub>12</sub> |
|-----|-----------------|-----------------|-----------------|-----------------|-----------------|-----------------|
| O1  | 58(2)           | 42(2)           | 46(2)           | 0(2)            | 4(2)            | -26(2)          |
| O2  | 67(2)           | 31(2)           | 54(2)           | -15(2)          | -14(2)          | -6(2)           |
| O3  | 51(2)           | 27(2)           | 45(2)           | -6(1)           | 2(2)            | -16(1)          |
| N1  | 39(2)           | 30(2)           | 35(2)           | -6(2)           | 6(2)            | -6(2)           |
| C1  | 33(3)           | 32(2)           | 42(3)           | -2(2)           | 0(2)            | -6(2)           |
| C2  | 40(3)           | 27(2)           | 36(2)           | -1(2)           | 1(2)            | -11(2)          |
| C3  | 33(2)           | 29(2)           | 38(3)           | -3(2)           | -4(2)           | -5(2)           |
| C4  | 31(2)           | 27(2)           | 38(3)           | -4(2)           | -5(2)           | -5(2)           |
| C7  | 36(3)           | 32(2)           | 37(3)           | -9(2)           | -3(2)           | -8(2)           |
| C8  | 34(3)           | 26(2)           | 40(3)           | -1(2)           | 1(2)            | -7(2)           |
| C9  | 41(3)           | 30(2)           | 41(3)           | -3(2)           | -5(2)           | -8(2)           |
| C10 | 41(3)           | 32(2)           | 46(3)           | -1(2)           | -11(2)          | -8(2)           |
| C11 | 41(3)           | 30(2)           | 45(3)           | -11(2)          | -16(2)          | -1(2)           |
| C12 | 40(3)           | 34(2)           | 39(3)           | -2(2)           | -4(2)           | -3(2)           |
| C13 | 52(3)           | 50(3)           | 63(3)           | 5(2)            | -3(3)           | -27(2)          |
| C14 | 58(3)           | 30(2)           | 79(4)           | -19(2)          | -17(3)          | -7(2)           |
| C15 | 48(3)           | 32(2)           | 47(3)           | -4(2)           | -4(2)           | -1(2)           |
| C16 | 59(4)           | 45(3)           | 73(4)           | -14(3)          | -17(3)          | 9(3)            |
| C17 | 45(3)           | 57(3)           | 68(4)           | -27(3)          | -13(3)          | 7(3)            |
| C18 | 42(3)           | 69(4)           | 58(3)           | -23(3)          | 3(3)            | -7(3)           |
| C19 | 49(3)           | 47(3)           | 41(3)           | -6(2)           | -2(2)           | -9(2)           |
| C20 | 40(3)           | 32(2)           | 40(3)           | -3(2)           | -5(2)           | -3(2)           |
| C21 | 44(3)           | 42(3)           | 42(3)           | -14(2)          | -3(2)           | -4(2)           |
| C22 | 42(3)           | 40(3)           | 48(3)           | -2(2)           | -13(2)          | -6(2)           |
| C23 | 59(3)           | 30(3)           | 75(4)           | -5(2)           | -26(3)          | -2(2)           |
| C24 | 59(3)           | 34(3)           | 53(3)           | -12(2)          | -15(3)          | -7(2)           |
| C25 | 89(4)           | 61(3)           | 71(4)           | -6(3)           | -36(3)          | 0(3)            |
| O4  | 56(2)           | 32(2)           | 49(2)           | -7(1)           | 12(2)           | -20(1)          |
| O5  | 52(2)           | 32(2)           | 61(2)           | -18(2)          | 1(2)            | -9(1)           |
| O6  | 46(2)           | 28(2)           | 47(2)           | -8(1)           | 6(1)            | -13(1)          |
| N2  | 43(2)           | 28(2)           | 36(2)           | -6(2)           | 7(2)            | -11(2)          |
| C31 | 34(3)           | 30(2)           | 37(3)           | -6(2)           | -5(2)           | -6(2)           |
| C32 | 38(3)           | 25(2)           | 36(2)           | -4(2)           | 2(2)            | -10(2)          |

|     |       |       |       |        |        |        |
|-----|-------|-------|-------|--------|--------|--------|
| C33 | 37(3) | 24(2) | 37(3) | -5(2)  | 0(2)   | -4(2)  |
| C34 | 35(3) | 28(2) | 42(3) | -3(2)  | -4(2)  | -5(2)  |
| C37 | 36(3) | 22(2) | 40(3) | -4(2)  | 3(2)   | -7(2)  |
| C38 | 41(3) | 24(2) | 44(3) | -9(2)  | -2(2)  | -6(2)  |
| C39 | 37(3) | 31(2) | 37(3) | -5(2)  | -4(2)  | -6(2)  |
| C40 | 40(3) | 27(2) | 47(3) | -5(2)  | -6(2)  | -8(2)  |
| C41 | 44(3) | 26(2) | 50(3) | -12(2) | -15(2) | 0(2)   |
| C42 | 39(3) | 32(2) | 43(3) | -9(2)  | 1(2)   | -5(2)  |
| C43 | 76(4) | 44(3) | 91(4) | -24(3) | 38(3)  | -34(3) |
| C44 | 60(3) | 33(2) | 59(3) | -10(2) | -11(3) | -7(2)  |
| C45 | 47(3) | 44(3) | 49(3) | -15(2) | -11(2) | -6(2)  |
| C46 | 35(3) | 52(3) | 61(3) | -3(3)  | -10(2) | -3(2)  |
| C47 | 49(3) | 51(3) | 51(3) | 0(2)   | 5(3)   | 6(2)   |
| C48 | 66(4) | 47(3) | 48(3) | -11(2) | 7(3)   | 12(3)  |
| C49 | 47(3) | 40(3) | 42(3) | -9(2)  | -5(2)  | -1(2)  |
| C50 | 43(3) | 41(3) | 41(3) | -2(2)  | -5(2)  | -11(2) |
| C51 | 57(3) | 38(3) | 39(3) | 3(2)   | -2(2)  | -11(2) |
| C52 | 52(3) | 26(2) | 49(3) | -7(2)  | -15(3) | -3(2)  |
| C53 | 40(3) | 46(3) | 58(3) | -10(2) | -8(3)  | -1(2)  |
| C54 | 42(3) | 46(3) | 48(3) | -9(2)  | -3(2)  | -7(2)  |
| C55 | 68(4) | 56(3) | 70(4) | -2(3)  | -19(3) | 0(3)   |

---

**Table S59.** Hydrogen coordinates ( $\times 10^4$ ) and isotropic displacement parameters ( $\text{\AA}^2 \times 10^3$ ) for (+/-)-**7**.

|      | x        | y        | z         | $U_{\text{(eq)}}$ |
|------|----------|----------|-----------|-------------------|
| H1   | 5240(40) | 6310(40) | 5120(16)  | 36(11)            |
| H10A | 8964     | 11123    | 4395      | 47                |
| H12A | 6025     | 8571     | 5520      | 46                |
| H13A | 11022    | 10540    | 3055      | 84                |
| H13B | 11246    | 10401    | 3748      | 84                |
| H13C | 10000    | 11497    | 3445      | 84                |
| H14A | 7859     | 12696    | 5613      | 81                |
| H14B | 7635     | 12659    | 4929      | 81                |
| H14C | 9260     | 12069    | 5223      | 81                |
| H15A | 8871     | 4872     | 4517      | 51                |
| H16A | 11400    | 3924     | 4393      | 70                |
| H17A | 13164    | 4756     | 3601      | 66                |
| H18A | 12278    | 6527     | 2909      | 66                |
| H19B | 9717     | 7461     | 3016      | 54                |
| H20A | 6804     | 5444     | 3033      | 45                |
| H21A | 5467     | 5919     | 2165      | 50                |
| H23B | 4555     | 9713     | 2501      | 65                |
| H24B | 5840     | 9261     | 3375      | 57                |
| H25A | 4646     | 9011     | 1422      | 109               |
| H25B | 2963     | 8410     | 1728      | 109               |
| H25C | 4226     | 7432     | 1438      | 109               |
| H2   | 5220(40) | 6380(40) | 10026(16) | 37(12)            |
| H40A | 9436     | 10728    | 9073      | 45                |
| H42A | 6017     | 8810     | 10234     | 45                |
| H43A | 11434    | 9710     | 7833      | 105               |
| H43B | 11624    | 9792     | 8516      | 105               |
| H43C | 10366    | 10772    | 8153      | 105               |
| H44A | 8215     | 12872    | 10089     | 75                |
| H44B | 8239     | 12538    | 9428      | 75                |
| H44C | 9666     | 11988    | 9846      | 75                |
| H45A | 9866     | 6190     | 9422      | 55                |
| H46A | 12035    | 4717     | 9431      | 59                |
| H47A | 12386    | 3270     | 8716      | 61                |

|      |       |      |      |    |
|------|-------|------|------|----|
| H48A | 10458 | 3311 | 8012 | 64 |
| H49A | 8235  | 4751 | 8012 | 51 |
| H50A | 8259  | 7289 | 7626 | 50 |
| H51A | 6769  | 7736 | 6801 | 54 |
| H53A | 2625  | 6992 | 7783 | 57 |
| H54A | 4101  | 6553 | 8616 | 54 |
| H55A | 3870  | 8516 | 6443 | 98 |
| H55B | 2433  | 7586 | 6778 | 98 |
| H55C | 3862  | 6912 | 6417 | 98 |

---

**Table S60.** Torsion angles [°] for (+/-)-7.

|               |           |                 |           |
|---------------|-----------|-----------------|-----------|
| C4-N1-C1-O3   | 178.2(4)  | C2-C3-C9-O1     | 2.5(7)    |
| C4-N1-C1-C2   | -1.3(5)   | C4-C3-C9-C10    | 0.0(6)    |
| O3-C1-C2-C3   | -178.9(4) | C2-C3-C9-C10    | -178.4(4) |
| N1-C1-C2-C3   | 0.6(4)    | O1-C9-C10-C11   | 177.8(4)  |
| O3-C1-C2-C7   | -62.3(5)  | C3-C9-C10-C11   | -1.1(6)   |
| N1-C1-C2-C7   | 117.2(4)  | C9-C10-C11-O2   | -178.4(4) |
| O3-C1-C2-C8   | 60.9(5)   | C9-C10-C11-C12  | 2.0(6)    |
| N1-C1-C2-C8   | -119.6(4) | C14-O2-C11-C10  | 4.9(6)    |
| C7-C2-C3-C4   | -115.2(4) | C14-O2-C11-C12  | -175.5(3) |
| C8-C2-C3-C4   | 116.2(4)  | C3-C4-C12-C11   | 0.5(6)    |
| C1-C2-C3-C4   | 0.3(4)    | N1-C4-C12-C11   | -179.3(4) |
| C7-C2-C3-C9   | 63.3(6)   | C10-C11-C12-C4  | -1.6(6)   |
| C8-C2-C3-C9   | -65.3(6)  | O2-C11-C12-C4   | 178.7(4)  |
| C1-C2-C3-C9   | 178.8(4)  | C19-C7-C15-C16  | 0.0(6)    |
| C9-C3-C4-C12  | 0.3(6)    | C2-C7-C15-C16   | -176.6(4) |
| C2-C3-C4-C12  | 179.1(4)  | C7-C15-C16-C17  | 1.0(7)    |
| C9-C3-C4-N1   | -179.8(4) | C15-C16-C17-C18 | -1.3(7)   |
| C2-C3-C4-N1   | -1.1(5)   | C16-C17-C18-C19 | 0.5(6)    |
| C1-N1-C4-C12  | -178.6(4) | C17-C18-C19-C7  | 0.5(6)    |
| C1-N1-C4-C3   | 1.5(5)    | C15-C7-C19-C18  | -0.7(6)   |
| C3-C2-C7-C15  | 90.0(4)   | C2-C7-C19-C18   | 175.9(4)  |
| C8-C2-C7-C15  | -140.6(4) | C24-C8-C20-C21  | 0.9(6)    |
| C1-C2-C7-C15  | -20.0(5)  | C2-C8-C20-C21   | -179.8(4) |
| C3-C2-C7-C19  | -86.5(4)  | C8-C20-C21-C22  | 1.2(6)    |
| C8-C2-C7-C19  | 43.0(4)   | C20-C21-C22-C23 | -2.6(6)   |
| C1-C2-C7-C19  | 163.5(3)  | C20-C21-C22-C25 | 177.6(4)  |
| C3-C2-C8-C20  | 175.4(3)  | C21-C22-C23-C24 | 2.1(7)    |
| C7-C2-C8-C20  | 47.8(5)   | C25-C22-C23-C24 | -178.1(4) |
| C1-C2-C8-C20  | -73.3(5)  | C22-C23-C24-C8  | -0.1(7)   |
| C3-C2-C8-C24  | -5.3(5)   | C20-C8-C24-C23  | -1.4(6)   |
| C7-C2-C8-C24  | -132.9(4) | C2-C8-C24-C23   | 179.3(4)  |
| C1-C2-C8-C24  | 106.0(4)  | C34-N2-C31-O6   | 175.8(4)  |
| C13-O1-C9-C10 | 19.5(6)   | C34-N2-C31-C32  | -5.0(4)   |
| C13-O1-C9-C3  | -161.5(4) | O6-C31-C32-C33  | -174.7(4) |
| C4-C3-C9-O1   | -179.1(4) | N2-C31-C32-C33  | 6.1(4)    |

|                 |           |                 |           |
|-----------------|-----------|-----------------|-----------|
| O6-C31-C32-C37  | -55.9(5)  | C32-C33-C39-O4  | 0.3(7)    |
| N2-C31-C32-C37  | 124.9(3)  | C34-C33-C39-C40 | -2.5(6)   |
| O6-C31-C32-C38  | 68.9(5)   | C32-C33-C39-C40 | -179.5(4) |
| N2-C31-C32-C38  | -110.2(4) | O4-C39-C40-C41  | 179.2(4)  |
| C37-C32-C33-C39 | 59.7(6)   | C33-C39-C40-C41 | -1.0(6)   |
| C38-C32-C33-C39 | -74.1(6)  | C44-O5-C41-C42  | -175.4(4) |
| C31-C32-C33-C39 | 172.0(4)  | C44-O5-C41-C40  | 5.3(6)    |
| C37-C32-C33-C34 | -117.5(4) | C39-C40-C41-O5  | -177.2(4) |
| C38-C32-C33-C34 | 108.7(4)  | C39-C40-C41-C42 | 3.5(6)    |
| C31-C32-C33-C34 | -5.2(4)   | C33-C34-C42-C41 | -1.4(6)   |
| C39-C33-C34-C42 | 3.8(6)    | N2-C34-C42-C41  | 177.2(4)  |
| C32-C33-C34-C42 | -178.5(4) | O5-C41-C42-C34  | 178.3(3)  |
| C39-C33-C34-N2  | -174.9(4) | C40-C41-C42-C34 | -2.4(6)   |
| C32-C33-C34-N2  | 2.7(5)    | C49-C37-C45-C46 | -0.3(6)   |
| C31-N2-C34-C42  | -177.2(4) | C32-C37-C45-C46 | 174.9(4)  |
| C31-N2-C34-C33  | 1.5(5)    | C37-C45-C46-C47 | 1.0(7)    |
| C33-C32-C37-C45 | 32.5(5)   | C45-C46-C47-C48 | -0.9(6)   |
| C38-C32-C37-C45 | 163.8(3)  | C46-C47-C48-C49 | 0.1(7)    |
| C31-C32-C37-C45 | -76.8(4)  | C47-C48-C49-C37 | 0.7(7)    |
| C33-C32-C37-C49 | -152.6(4) | C45-C37-C49-C48 | -0.5(6)   |
| C38-C32-C37-C49 | -21.3(5)  | C32-C37-C49-C48 | -175.5(4) |
| C31-C32-C37-C49 | 98.1(4)   | C54-C38-C50-C51 | -1.6(6)   |
| C33-C32-C38-C54 | -91.5(4)  | C32-C38-C50-C51 | 179.9(4)  |
| C37-C32-C38-C54 | 135.8(4)  | C38-C50-C51-C52 | -0.1(6)   |
| C31-C32-C38-C54 | 17.6(5)   | C50-C51-C52-C53 | 1.6(6)    |
| C33-C32-C38-C50 | 86.9(4)   | C50-C51-C52-C55 | -177.5(4) |
| C37-C32-C38-C50 | -45.8(5)  | C51-C52-C53-C54 | -1.4(6)   |
| C31-C32-C38-C50 | -163.9(3) | C55-C52-C53-C54 | 177.7(4)  |
| C43-O4-C39-C33  | -171.4(4) | C52-C53-C54-C38 | -0.3(6)   |
| C43-O4-C39-C40  | 8.4(6)    | C50-C38-C54-C53 | 1.8(6)    |
| C34-C33-C39-O4  | 177.3(4)  | C32-C38-C54-C53 | -179.7(4) |

---

**Table S61.** Hydrogen bonds and close contacts for (+/-)-**7** [Å and °].

| D-H...A      | d(D-H)  | d(H...A) | d(D...A) | <(DHA) |
|--------------|---------|----------|----------|--------|
| N1-H1...O3#1 | 0.94(4) | 1.92(4)  | 2.824(4) | 162(3) |
| N2-H2...O6#2 | 0.93(4) | 1.88(4)  | 2.776(4) | 161(3) |

Symmetry transformations used to generate equivalent atoms:

#1 -x+1,-y+1,-z+1 #2 -x+1,-y+1,-z+2

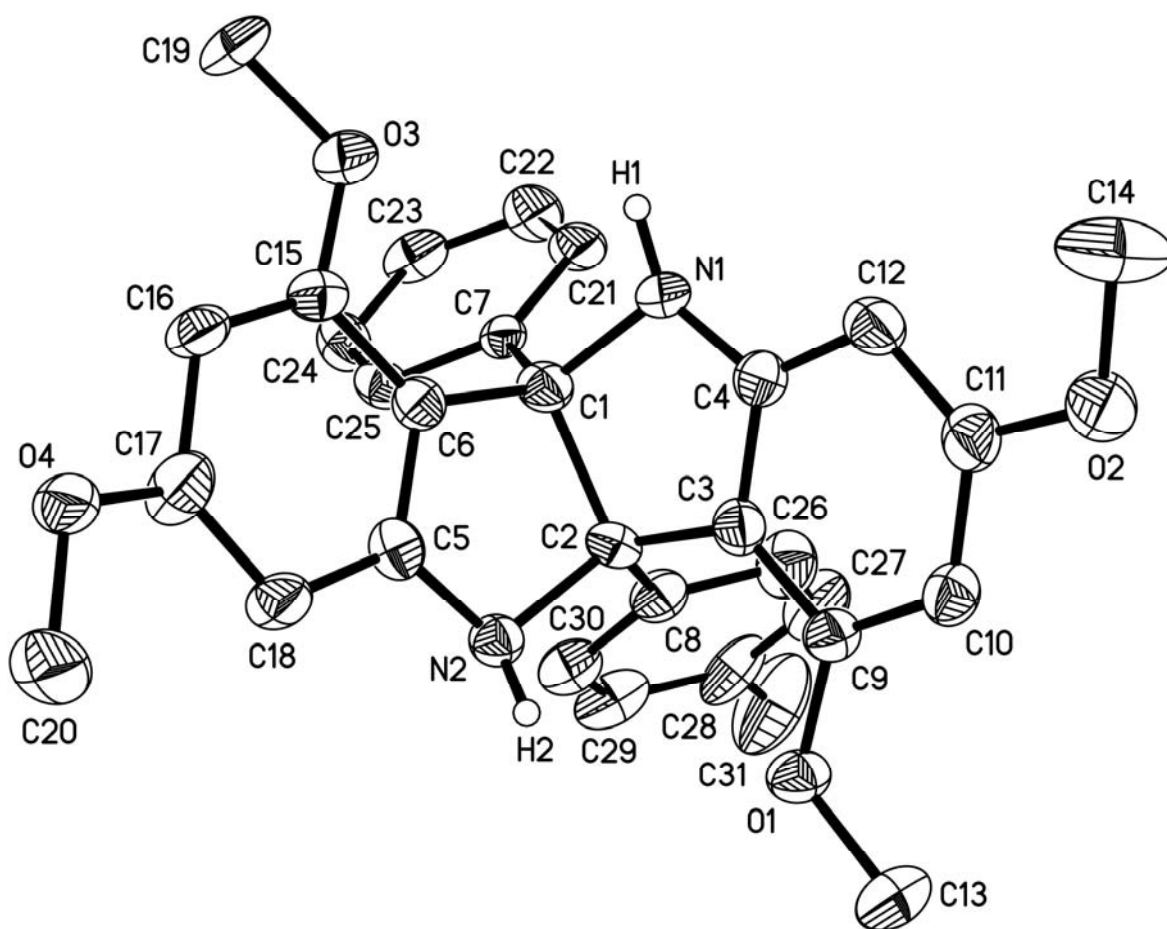

**Figure S66.** ORTEP diagram of **8** with thermal ellipsoids drawn at 50% probability level. Hydrogen atoms were omitted for clarity, except for H1 and H2, to emphasize valency of the nitrogen atoms.

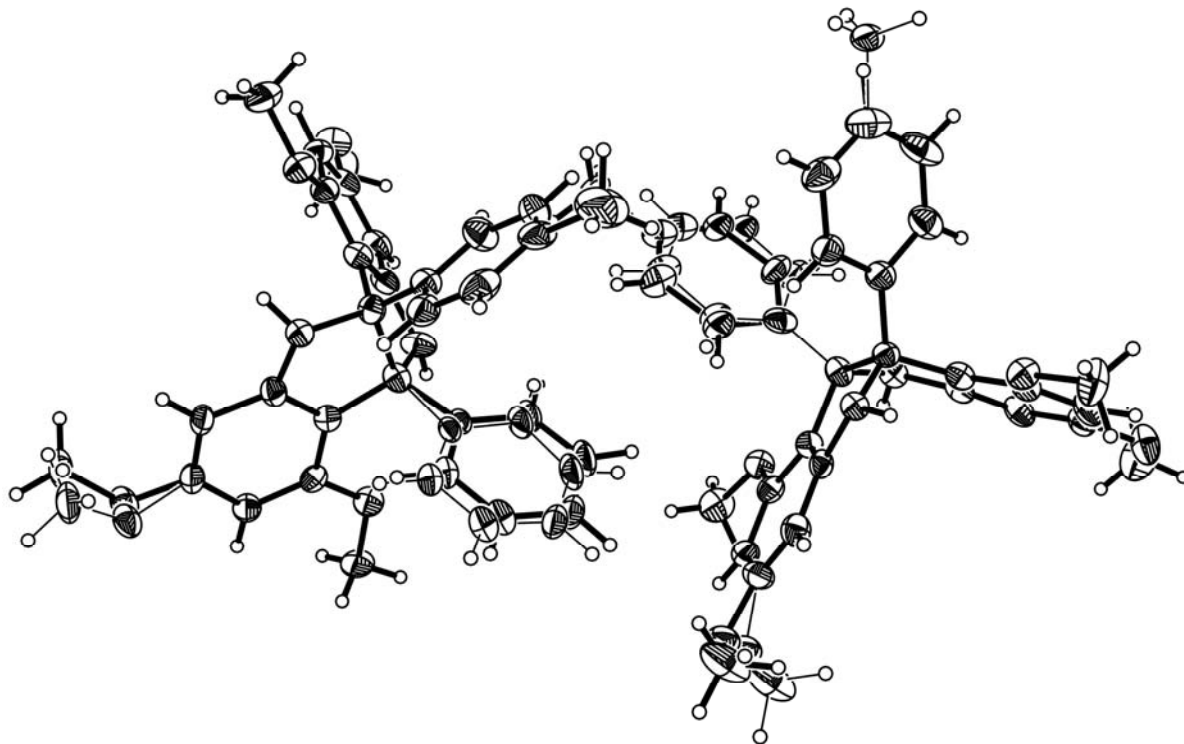

**Figure S67.** ORTEP diagram of asymmetric unit of **8** (disordered) with thermal ellipsoids drawn at 50% probability level.



## Experimental Details for the Structure Determination of (+/-)-8.

### Data collection

A crystal (0.40 x 0.16 x 0.08 mm<sup>3</sup>) was placed onto the tip of a 0.1 mm diameter glass capillary tube or fiber and mounted on a Bruker SMART APEX II CCD Platform diffractometer for a data collection at 100.0(5) K.<sup>1</sup> A preliminary set of cell constants and an orientation matrix were calculated from reflections harvested from three orthogonal wedges of reciprocal space. The full data collection was carried out using MoK $\alpha$  radiation (graphite monochromator) with a frame time of 60 seconds and a detector distance of 3.98 cm. A randomly oriented region of reciprocal space was surveyed: four major sections of frames were collected with 0.50° steps in  $\omega$  at four different  $\phi$  settings and a detector position of -38° in  $2\theta$ . The intensity data were corrected for absorption.<sup>2</sup> Final cell constants were calculated from the xyz centroids of 4058 strong reflections from the actual data collection after integration.<sup>3</sup> See Table S62 for additional crystal and refinement information.

### Structure solution and refinement

The structure was solved using SIR97<sup>4</sup> and refined using SHELXL-97.<sup>5</sup> The space group  $P2_1$  was determined based on observed disorder ratios: due to the refined occupancies of the components of the disordered groups, the refinement had to be performed in chiral space group  $P2_1$ , despite significant pseudosymmetric effects and worse overall statistics. A refinement in centrosymmetric space group  $P2_1/c$  requires that all disordered component ratios be 1:1 because of crystallographic symmetry (see below). However, this was clearly not the case, and forcing the ratios to be 1:1 resulted in an inaccurate and unrealistic model. A direct-methods solution was calculated which provided most non-hydrogen atoms from the E-map. Full-matrix least squares / difference Fourier cycles were performed which located the remaining non-hydrogen atoms. All non-hydrogen atoms were refined with anisotropic displacement parameters. Amine hydrogen atoms were found from the difference Fourier map, and their positional parameters were refined independently from those of their respective bonded nitrogen atoms. Their isotropic displacement parameters were relative to those of the nitrogen atoms, such that  $U_{\text{iso}}[\text{H}] = 1.5 * U_{\text{eq}}[\text{N}]$ . All other hydrogen atoms were placed in ideal positions and refined as riding atoms with relative isotropic displacement parameters. Due to the lack of significant anomalous scattering effects, all Friedel opposites were merged in the final refinement. The final full matrix least squares refinement converged to  $R1 = 0.0559$  ( $F^2$ ,  $I > 2\sigma(I)$ ) and  $wR2 = 0.1372$  ( $F^2$ , all data).

### Structure description

The structure is the one suggested. The structure was modeled in space group  $P2_1$  with two independent molecules and all atoms in general positions. Phenyl group C7, C21-C25 on one independent molecule and methoxy group O8-C70 on the other independent molecule are modeled as disordered over two positions each (75:25). Initially the ratios of each were determined independently, which resulted in a common ratio. Further examination showed that the disorders had to be refined together to avoid any violation of van der Waals radii. Phenyl group C57, C71-C75 on one independent molecule and methoxy group O4-C20 on the other independent molecule are modeled as disordered over two positions (50:50 exactly, a requirement of the crystallographic two-fold screw axes). Independent refinements of these disorders also resulted in the 50:50 ratio. Additionally, methyl group C81 on one molecule is disordered (50:50, again a requirement of symmetry) over the two possible phenyl ring locations, while methyl group C31 only exists on one phenyl ring in the other molecule. Weak to moderate intermolecular and weak intramolecular hydrogen bonding is observed (see

Table S68).

### References

- <sup>1</sup> *APEX2*, version 2011.4-1; Bruker AXS: Madison, WI, 2011.
- <sup>2</sup> Sheldrick, G. M. *SADABS*, version 2008/1; University of Göttingen: Göttingen, Germany, 2008.
- <sup>3</sup> *SAINTE*, version 7.68A; Bruker AXS: Madison, WI, 2009.
- <sup>4</sup> Altomare, A.; Burla, M. C.; Camalli, M.; Casciarano, G. L.; Giacovazzo, C.; Guagliardi, A.; Moliterni, A. G. G.; Polidori, G.; Spagna, R. *SIR97: A new program for solving and refining crystal structures*; Istituto di Cristallografia, CNR: Bari, Italy, 1999.
- <sup>5</sup> Sheldrick, G. M. *Acta. Cryst.* **2008**, *A64*, 112-122.

### Some equations of interest:

$$R_{\text{int}} = \Sigma |F_o^2 - \langle F_o^2 \rangle| / \Sigma |F_o^2|$$

$$R1 = \Sigma ||F_o| - |F_c|| / \Sigma |F_o|$$

$$wR2 = [\Sigma [w(F_o^2 - F_c^2)^2] / \Sigma [w(F_o^2)^2]]^{1/2}$$

where  $w = 1 / [\sigma^2(F_o^2) + (aP)^2 + bP]$  and

$$P = 1/3 \max(0, F_o^2) + 2/3 F_c^2$$

$$\text{GooF} = S = [\Sigma [w(F_o^2 - F_c^2)^2] / (m-n)]^{1/2}$$

where  $m$  = number of reflections and  $n$  = number of parameters

**Table S62.** Crystal data and structure refinement for (+/-)-**8**.

|                                                     |                                                               |                           |
|-----------------------------------------------------|---------------------------------------------------------------|---------------------------|
| Identification code                                 | (±)- <b>8</b> , JONJK63                                       |                           |
| Empirical formula                                   | C <sub>31</sub> H <sub>30</sub> N <sub>2</sub> O <sub>4</sub> |                           |
| Formula weight                                      | 494.57                                                        |                           |
| Temperature                                         | 100.0(5) K                                                    |                           |
| Wavelength                                          | 0.71073 Å                                                     |                           |
| Crystal system                                      | Monoclinic                                                    |                           |
| Space group                                         | <i>P</i> 2 <sub>1</sub>                                       |                           |
| Unit cell dimensions                                | <i>a</i> = 11.6386(8) Å                                       | $\alpha = 90^\circ$       |
|                                                     | <i>b</i> = 19.1068(13) Å                                      | $\beta = 94.728(1)^\circ$ |
|                                                     | <i>c</i> = 11.7615(8) Å                                       | $\gamma = 90^\circ$       |
| Volume                                              | 2606.6(3) Å <sup>3</sup>                                      |                           |
| <i>Z</i>                                            | 4                                                             |                           |
| Density (calculated)                                | 1.260 Mg/m <sup>3</sup>                                       |                           |
| Absorption coefficient                              | 0.084 mm <sup>-1</sup>                                        |                           |
| <i>F</i> (000)                                      | 1048                                                          |                           |
| Crystal color, morphology                           | colorless, needle                                             |                           |
| Crystal size                                        | 0.40 x 0.16 x 0.08 mm <sup>3</sup>                            |                           |
| Theta range for data collection                     | 1.74 to 28.28°                                                |                           |
| Index ranges                                        | -15 ≤ <i>h</i> ≤ 15, -25 ≤ <i>k</i> ≤ 25, -15 ≤ <i>l</i> ≤ 15 |                           |
| Reflections collected                               | 37187                                                         |                           |
| Independent reflections                             | 6662 [ <i>R</i> (int) = 0.0869]                               |                           |
| Observed reflections                                | 4153                                                          |                           |
| Completeness to theta = 28.28°                      | 100.0%                                                        |                           |
| Absorption correction                               | Multi-scan                                                    |                           |
| Max. and min. transmission                          | 0.9933 and 0.9673                                             |                           |
| Refinement method                                   | Full-matrix least-squares on <i>F</i> <sup>2</sup>            |                           |
| Data / restraints / parameters                      | 6662 / 30 / 657                                               |                           |
| Goodness-of-fit on <i>F</i> <sup>2</sup>            | 1.022                                                         |                           |
| Final <i>R</i> indices [ <i>I</i> > 2σ( <i>I</i> )] | <i>R</i> 1 = 0.0559, <i>wR</i> 2 = 0.1155                     |                           |
| <i>R</i> indices (all data)                         | <i>R</i> 1 = 0.1029, <i>wR</i> 2 = 0.1372                     |                           |
| Largest diff. peak and hole                         | 0.346 and -0.362 e.Å <sup>-3</sup>                            |                           |

**Table S63.** Atomic coordinates ( $\times 10^4$ ) and equivalent isotropic displacement parameters ( $\text{\AA}^2 \times 10^3$ ) for (+/-)-**8**.  $U_{\text{eq}}$  is defined as one third of the trace of the orthogonalized  $U_{ij}$  tensor.

|      | x         | y        | z        | $U_{\text{eq}}$ |
|------|-----------|----------|----------|-----------------|
| N1   | 4948(4)   | -551(3)  | 1426(4)  | 33(1)           |
| N2   | 7090(4)   | -886(3)  | 3667(4)  | 26(1)           |
| C1   | 5945(4)   | -267(3)  | 2137(5)  | 27(1)           |
| C2   | 5870(4)   | -666(3)  | 3340(5)  | 28(1)           |
| C3   | 5132(4)   | -1293(3) | 2958(5)  | 28(1)           |
| C4   | 4658(4)   | -1200(4) | 1855(5)  | 29(1)           |
| C5   | 7677(4)   | -890(3)  | 2649(5)  | 27(1)           |
| C6   | 7082(4)   | -527(3)  | 1790(5)  | 25(1)           |
| C9   | 4904(5)   | -1893(3) | 3553(5)  | 28(1)           |
| C10  | 4215(4)   | -2412(3) | 3024(5)  | 29(1)           |
| C11  | 3774(5)   | -2321(4) | 1899(5)  | 34(2)           |
| C12  | 3975(4)   | -1717(4) | 1287(5)  | 32(1)           |
| O1   | 5418(3)   | -1914(2) | 4646(3)  | 30(1)           |
| C13  | 5208(6)   | -2524(4) | 5308(6)  | 42(2)           |
| O2   | 3125(4)   | -2871(3) | 1476(4)  | 40(1)           |
| C14  | 2882(6)   | -2925(4) | 285(5)   | 60(1)           |
| C15  | 7595(4)   | -409(3)  | 773(5)   | 26(1)           |
| C16  | 8643(5)   | -699(3)  | 613(5)   | 30(1)           |
| C17  | 9199(5)   | -1084(4) | 1515(7)  | 43(2)           |
| C18  | 8753(5)   | -1196(3) | 2540(5)  | 33(1)           |
| O3   | 6967(3)   | -21(2)   | -19(3)   | 31(1)           |
| C19  | 7521(5)   | 161(4)   | -1008(5) | 38(2)           |
| O4   | 10098(6)  | -1482(5) | 1097(8)  | 36(2)           |
| C20  | 10628(10) | -1979(7) | 1883(11) | 45(2)           |
| O4'  | 10374(6)  | -1243(6) | 1383(9)  | 36(2)           |
| C20' | 11092(10) | -1531(8) | 2328(12) | 45(2)           |
| C7   | 5848(10)  | 532(4)   | 2190(20) | 22(2)           |
| C21  | 4862(10)  | 893(7)   | 1824(18) | 36(2)           |
| C22  | 4850(10)  | 1617(6)  | 1899(14) | 40(2)           |
| C23  | 5844(10)  | 1992(6)  | 2257(14) | 36(3)           |
| C24  | 6813(10)  | 1615(6)  | 2618(15) | 35(2)           |
| C25  | 6829(10)  | 906(6)   | 2592(17) | 27(2)           |
| C7'  | 6090(30)  | 531(9)   | 2240(60) | 22(2)           |

|      |          |          |          |       |
|------|----------|----------|----------|-------|
| C21' | 5120(30) | 915(18)  | 1980(50) | 36(2) |
| C22' | 5200(20) | 1640(18) | 1970(40) | 40(2) |
| C23' | 6210(30) | 1972(16) | 2400(40) | 36(3) |
| C24' | 7140(30) | 1572(17) | 2750(50) | 35(2) |
| C25' | 7110(30) | 862(17)  | 2650(50) | 27(2) |
| C8   | 5397(5)  | -243(3)  | 4281(5)  | 30(1) |
| C26  | 4222(5)  | -221(4)  | 4364(6)  | 41(1) |
| C27  | 3797(6)  | 198(4)   | 5219(7)  | 47(2) |
| C28  | 4485(6)  | 587(4)   | 5967(6)  | 44(2) |
| C29  | 5661(7)  | 557(4)   | 5860(6)  | 46(1) |
| C30  | 6131(5)  | 145(4)   | 5045(6)  | 36(1) |
| C31  | 3961(8)  | 1032(5)  | 6862(8)  | 84(3) |
| N3   | 11(4)    | 3120(3)  | 1415(5)  | 30(1) |
| N4   | 2164(4)  | 3451(3)  | 3655(4)  | 26(1) |
| C51  | 1010(4)  | 2841(3)  | 2146(5)  | 27(1) |
| C52  | 951(4)   | 3258(3)  | 3337(5)  | 24(1) |
| C53  | 216(4)   | 3862(3)  | 2948(5)  | 28(1) |
| C54  | -252(4)  | 3783(4)  | 1831(5)  | 29(1) |
| C55  | 2766(4)  | 3462(3)  | 2694(5)  | 24(1) |
| C56  | 2161(4)  | 3095(3)  | 1805(5)  | 25(1) |
| C59  | 1(4)     | 4473(4)  | 3536(5)  | 28(1) |
| C60  | -671(4)  | 4994(4)  | 3017(5)  | 34(2) |
| C61  | -1126(4) | 4893(4)  | 1878(5)  | 31(1) |
| C62  | -934(4)  | 4294(4)  | 1279(5)  | 32(1) |
| O5   | 525(3)   | 4526(2)  | 4612(3)  | 30(1) |
| C63  | 316(6)   | 5132(4)  | 5247(6)  | 44(2) |
| O6   | -1764(3) | 5456(3)  | 1436(4)  | 42(1) |
| C64  | -2240(6) | 5373(4)  | 259(5)   | 60(1) |
| C65  | 2679(4)  | 2974(3)  | 800(5)   | 26(1) |
| C66  | 3774(4)  | 3235(3)  | 685(5)   | 30(1) |
| C67  | 4333(5)  | 3615(4)  | 1554(6)  | 34(1) |
| C68  | 3856(5)  | 3724(3)  | 2592(5)  | 33(1) |
| O7   | 2052(3)  | 2572(2)  | -4(3)    | 31(1) |
| C69  | 2608(6)  | 2385(4)  | -1015(6) | 43(2) |
| O8   | 5471(6)  | 3791(5)  | 1393(9)  | 39(2) |
| C70  | 6146(11) | 4090(9)  | 2336(12) | 67(4) |
| O8'  | 5280(16) | 3982(13) | 1220(20) | 39(2) |

|      |           |          |          |       |
|------|-----------|----------|----------|-------|
| C70' | 5760(30)  | 4480(20) | 2020(30) | 67(4) |
| C57  | 988(5)    | 2056(4)  | 2233(5)  | 32(1) |
| C71  | 112(18)   | 1573(7)  | 1900(40) | 35(3) |
| C72  | 239(12)   | 849(7)   | 2066(14) | 40(2) |
| C73  | 1255(12)  | 578(7)   | 2507(14) | 33(2) |
| C74  | 2143(15)  | 1019(7)  | 2882(16) | 35(3) |
| C75  | 1991(16)  | 1747(7)  | 2700(30) | 40(2) |
| C57' | 988(5)    | 2056(4)  | 2233(5)  | 32(1) |
| C71' | -54(19)   | 1735(7)  | 1850(50) | 35(3) |
| C72' | -146(12)  | 1003(7)  | 1835(16) | 40(2) |
| C73' | 769(12)   | 611(7)   | 2237(14) | 33(2) |
| C74' | 1810(14)  | 920(7)   | 2624(17) | 35(3) |
| C75' | 1895(16)  | 1659(7)  | 2660(30) | 40(2) |
| C58  | 462(5)    | 2822(3)  | 4263(5)  | 30(1) |
| C76  | -722(5)   | 2771(4)  | 4345(6)  | 41(1) |
| C77  | -1214(6)  | 2363(4)  | 5128(6)  | 49(2) |
| C78  | -507(7)   | 1972(4)  | 5890(6)  | 51(2) |
| C79  | 672(7)    | 2012(4)  | 5855(6)  | 46(1) |
| C80  | 1143(5)   | 2429(3)  | 5035(6)  | 36(1) |
| C81  | 1438(8)   | -219(4)  | 2599(8)  | 41(2) |
| C81' | -1135(12) | 1534(7)  | 6734(12) | 47(3) |

---

**Table S64.** Bond lengths [Å] and angles [°] for (+/-)-**8**.

|              |           |               |           |
|--------------|-----------|---------------|-----------|
| N(1)-C(4)    | 1.391(9)  | C(16)-C(17)   | 1.404(9)  |
| N(1)-C(1)    | 1.476(7)  | C(16)-H(16)   | 0.9500    |
| N(1)-H(1)    | 0.84(6)   | C(17)-C(18)   | 1.369(9)  |
| N(2)-C(5)    | 1.426(7)  | C(17)-O(4)    | 1.414(9)  |
| N(2)-C(2)    | 1.501(7)  | C(17)-O(4')   | 1.421(9)  |
| N(2)-H(2)    | 0.90(6)   | C(18)-H(18)   | 0.9500    |
| C(1)-C(6)    | 1.501(7)  | O(3)-C(19)    | 1.419(7)  |
| C(1)-C(7)    | 1.534(10) | C(19)-H(19A)  | 0.9800    |
| C(1)-C(7')   | 1.539(17) | C(19)-H(19B)  | 0.9800    |
| C(1)-C(2)    | 1.616(8)  | C(19)-H(19C)  | 0.9800    |
| C(2)-C(8)    | 1.510(8)  | O(4)-C(20)    | 1.429(11) |
| C(2)-C(3)    | 1.520(9)  | C(20)-H(20A)  | 0.9800    |
| C(3)-C(4)    | 1.378(8)  | C(20)-H(20B)  | 0.9800    |
| C(3)-C(9)    | 1.381(8)  | C(20)-H(20C)  | 0.9800    |
| C(4)-C(12)   | 1.401(9)  | O(4')-C(20')  | 1.443(11) |
| C(5)-C(6)    | 1.366(8)  | C(20')-H(20D) | 0.9800    |
| C(5)-C(18)   | 1.398(7)  | C(20')-H(20E) | 0.9800    |
| C(6)-C(15)   | 1.399(8)  | C(20')-H(20F) | 0.9800    |
| C(9)-O(1)    | 1.373(7)  | C(7)-C(21)    | 1.378(10) |
| C(9)-C(10)   | 1.390(8)  | C(7)-C(25)    | 1.395(10) |
| C(10)-C(11)  | 1.390(8)  | C(21)-C(22)   | 1.386(12) |
| C(10)-H(10)  | 0.9500    | C(21)-H(21)   | 0.9500    |
| C(11)-O(2)   | 1.364(8)  | C(22)-C(23)   | 1.396(12) |
| C(11)-C(12)  | 1.391(9)  | C(22)-H(22)   | 0.9500    |
| C(12)-H(12)  | 0.9500    | C(23)-C(24)   | 1.376(10) |
| O(1)-C(13)   | 1.433(8)  | C(23)-H(23)   | 0.9500    |
| C(13)-H(13A) | 0.9800    | C(24)-C(25)   | 1.355(11) |
| C(13)-H(13B) | 0.9800    | C(24)-H(24)   | 0.9500    |
| C(13)-H(13C) | 0.9800    | C(25)-H(25)   | 0.9500    |
| O(2)-C(14)   | 1.410(7)  | C(7')-C(21')  | 1.365(18) |
| C(14)-H(14A) | 0.9800    | C(7')-C(25')  | 1.395(17) |
| C(14)-H(14B) | 0.9800    | C(21')-C(22') | 1.389(19) |
| C(14)-H(14C) | 0.9800    | C(21')-H(21') | 0.9500    |
| C(15)-O(3)   | 1.355(7)  | C(22')-C(23') | 1.388(19) |
| C(15)-C(16)  | 1.366(7)  | C(22')-H(22') | 0.9500    |

|               |           |               |           |
|---------------|-----------|---------------|-----------|
| C(23')-C(24') | 1.360(19) | C(59)-C(60)   | 1.377(9)  |
| C(23')-H(23') | 0.9500    | C(60)-C(61)   | 1.413(8)  |
| C(24')-C(25') | 1.362(18) | C(60)-H(60)   | 0.9500    |
| C(24')-H(24') | 0.9500    | C(61)-C(62)   | 1.372(9)  |
| C(25')-H(25') | 0.9500    | C(61)-O(6)    | 1.383(7)  |
| C(8)-C(26)    | 1.379(8)  | C(62)-H(62)   | 0.9500    |
| C(8)-C(30)    | 1.400(8)  | O(5)-C(63)    | 1.410(8)  |
| C(26)-C(27)   | 1.407(9)  | C(63)-H(63A)  | 0.9800    |
| C(26)-H(26)   | 0.9500    | C(63)-H(63B)  | 0.9800    |
| C(27)-C(28)   | 1.361(10) | C(63)-H(63C)  | 0.9800    |
| C(27)-H(27)   | 0.9500    | O(6)-C(64)    | 1.457(7)  |
| C(28)-C(29)   | 1.386(9)  | C(64)-H(64A)  | 0.9800    |
| C(28)-C(31)   | 1.518(10) | C(64)-H(64B)  | 0.9800    |
| C(29)-C(30)   | 1.387(9)  | C(64)-H(64C)  | 0.9800    |
| C(29)-H(29)   | 0.9500    | C(65)-O(7)    | 1.379(7)  |
| C(30)-H(30)   | 0.9500    | C(65)-C(66)   | 1.386(7)  |
| C(31)-H(31A)  | 0.9800    | C(66)-C(67)   | 1.372(9)  |
| C(31)-H(31B)  | 0.9800    | C(66)-H(66A)  | 0.9500    |
| C(31)-H(31C)  | 0.9800    | C(67)-O(8')   | 1.392(11) |
| N(3)-C(54)    | 1.400(8)  | C(67)-O(8)    | 1.394(7)  |
| N(3)-C(51)    | 1.486(7)  | C(67)-C(68)   | 1.398(9)  |
| N(3)-H(3)     | 0.97(5)   | C(68)-H(68A)  | 0.9500    |
| N(4)-C(55)    | 1.378(7)  | O(7)-C(69)    | 1.444(7)  |
| N(4)-C(52)    | 1.477(7)  | C(69)-H(69A)  | 0.9800    |
| N(4)-H(4)     | 0.97(6)   | C(69)-H(69B)  | 0.9800    |
| C(51)-C(57)   | 1.504(10) | C(69)-H(69C)  | 0.9800    |
| C(51)-C(56)   | 1.510(8)  | O(8)-C(70)    | 1.425(10) |
| C(51)-C(52)   | 1.619(8)  | C(70)-H(70A)  | 0.9800    |
| C(52)-C(53)   | 1.486(8)  | C(70)-H(70B)  | 0.9800    |
| C(52)-C(58)   | 1.519(8)  | C(70)-H(70C)  | 0.9800    |
| C(53)-C(54)   | 1.388(8)  | O(8')-C(70')  | 1.422(13) |
| C(53)-C(59)   | 1.391(9)  | C(70')-H(70D) | 0.9800    |
| C(54)-C(62)   | 1.385(9)  | C(70')-H(70E) | 0.9800    |
| C(55)-C(68)   | 1.378(8)  | C(70')-H(70F) | 0.9800    |
| C(55)-C(56)   | 1.400(7)  | C(57)-C(75)   | 1.380(14) |
| C(56)-C(65)   | 1.390(8)  | C(57)-C(71)   | 1.406(13) |
| C(59)-O(5)    | 1.363(6)  | C(71)-C(72)   | 1.403(15) |



|                |           |                   |           |
|----------------|-----------|-------------------|-----------|
| C(71)-H(71)    | 0.9500    | C(1)-N(1)-H(1)    | 113(4)    |
| C(72)-C(73)    | 1.354(15) | C(5)-N(2)-C(2)    | 107.2(5)  |
| C(72)-H(72)    | 0.9500    | C(5)-N(2)-H(2)    | 106(3)    |
| C(73)-C(74)    | 1.378(14) | C(2)-N(2)-H(2)    | 115(3)    |
| C(73)-C(81)    | 1.541(16) | N(1)-C(1)-C(6)    | 113.2(5)  |
| C(74)-C(75)    | 1.416(14) | N(1)-C(1)-C(7)    | 109.5(7)  |
| C(74)-H(74)    | 0.9500    | C(6)-C(1)-C(7)    | 114.2(8)  |
| C(75)-H(75)    | 0.9500    | N(1)-C(1)-C(7')   | 119.1(17) |
| C(71')-C(72')  | 1.403(15) | C(6)-C(1)-C(7')   | 104.8(19) |
| C(71')-H(71')  | 0.9500    | N(1)-C(1)-C(2)    | 103.1(5)  |
| C(72')-C(73')  | 1.354(16) | C(6)-C(1)-C(2)    | 101.3(4)  |
| C(72')-H(72')  | 0.9500    | C(7)-C(1)-C(2)    | 115.0(11) |
| C(73')-C(74')  | 1.391(15) | C(7')-C(1)-C(2)   | 114(3)    |
| C(73')-H(73')  | 0.9500    | N(2)-C(2)-C(8)    | 110.9(5)  |
| C(74')-C(75')  | 1.416(14) | N(2)-C(2)-C(3)    | 110.7(5)  |
| C(74')-H(74')  | 0.9500    | C(8)-C(2)-C(3)    | 114.1(5)  |
| C(75')-H(75')  | 0.9500    | N(2)-C(2)-C(1)    | 103.8(4)  |
| C(58)-C(80)    | 1.378(8)  | C(8)-C(2)-C(1)    | 116.0(5)  |
| C(58)-C(76)    | 1.393(8)  | C(3)-C(2)-C(1)    | 100.5(5)  |
| C(76)-C(77)    | 1.367(10) | C(4)-C(3)-C(9)    | 120.3(6)  |
| C(76)-H(76A)   | 0.9500    | C(4)-C(3)-C(2)    | 110.5(5)  |
| C(77)-C(78)    | 1.384(11) | C(9)-C(3)-C(2)    | 129.2(5)  |
| C(77)-H(77A)   | 0.9500    | C(3)-C(4)-N(1)    | 111.4(5)  |
| C(78)-C(79)    | 1.379(10) | C(3)-C(4)-C(12)   | 121.7(6)  |
| C(78)-C(81')   | 1.530(14) | N(1)-C(4)-C(12)   | 126.9(6)  |
| C(78)-H(78)    | 0.9500    | C(6)-C(5)-C(18)   | 123.3(6)  |
| C(79)-C(80)    | 1.397(9)  | C(6)-C(5)-N(2)    | 111.7(5)  |
| C(79)-H(79A)   | 0.9500    | C(18)-C(5)-N(2)   | 125.0(6)  |
| C(80)-H(80A)   | 0.9500    | C(5)-C(6)-C(15)   | 119.2(5)  |
| C(81)-H(81A)   | 0.9800    | C(5)-C(6)-C(1)    | 111.8(5)  |
| C(81)-H(81B)   | 0.9800    | C(15)-C(6)-C(1)   | 128.9(5)  |
| C(81)-H(81C)   | 0.9800    | O(1)-C(9)-C(3)    | 114.3(5)  |
| C(81')-H(81D)  | 0.9800    | O(1)-C(9)-C(10)   | 126.1(6)  |
| C(81')-H(81E)  | 0.9800    | C(3)-C(9)-C(10)   | 119.6(6)  |
| C(81')-H(81F)  | 0.9800    | C(11)-C(10)-C(9)  | 119.4(6)  |
| C(4)-N(1)-C(1) | 109.0(5)  | C(11)-C(10)-H(10) | 120.3     |
| C(4)-N(1)-H(1) | 127(4)    | C(9)-C(10)-H(10)  | 120.3     |

|                     |          |                      |           |
|---------------------|----------|----------------------|-----------|
| O(2)-C(11)-C(10)    | 113.6(6) | H(19A)-C(19)-H(19B)  | 109.5     |
| O(2)-C(11)-C(12)    | 124.2(6) | O(3)-C(19)-H(19C)    | 109.5     |
| C(10)-C(11)-C(12)   | 122.2(6) | H(19A)-C(19)-H(19C)  | 109.5     |
| C(11)-C(12)-C(4)    | 116.8(6) | H(19B)-C(19)-H(19C)  | 109.5     |
| C(11)-C(12)-H(12)   | 121.6    | C(17)-O(4)-C(20)     | 115.1(8)  |
| C(4)-C(12)-H(12)    | 121.6    | C(17)-O(4')-C(20')   | 119.9(9)  |
| C(9)-O(1)-C(13)     | 116.8(5) | C(21)-C(7)-C(25)     | 119.2(8)  |
| O(1)-C(13)-H(13A)   | 109.5    | C(21)-C(7)-C(1)      | 123.1(10) |
| O(1)-C(13)-H(13B)   | 109.5    | C(25)-C(7)-C(1)      | 117.6(9)  |
| H(13A)-C(13)-H(13B) | 109.5    | C(7)-C(21)-C(22)     | 119.4(9)  |
| O(1)-C(13)-H(13C)   | 109.5    | C(7)-C(21)-H(21)     | 120.3     |
| H(13A)-C(13)-H(13C) | 109.5    | C(22)-C(21)-H(21)    | 120.3     |
| H(13B)-C(13)-H(13C) | 109.5    | C(21)-C(22)-C(23)    | 121.3(8)  |
| C(11)-O(2)-C(14)    | 118.6(6) | C(21)-C(22)-H(22)    | 119.4     |
| O(2)-C(14)-H(14A)   | 109.5    | C(23)-C(22)-H(22)    | 119.4     |
| O(2)-C(14)-H(14B)   | 109.5    | C(24)-C(23)-C(22)    | 117.6(8)  |
| H(14A)-C(14)-H(14B) | 109.5    | C(24)-C(23)-H(23)    | 121.2     |
| O(2)-C(14)-H(14C)   | 109.5    | C(22)-C(23)-H(23)    | 121.2     |
| H(14A)-C(14)-H(14C) | 109.5    | C(25)-C(24)-C(23)    | 121.9(9)  |
| H(14B)-C(14)-H(14C) | 109.5    | C(25)-C(24)-H(24)    | 119.0     |
| O(3)-C(15)-C(16)    | 124.4(5) | C(23)-C(24)-H(24)    | 119.0     |
| O(3)-C(15)-C(6)     | 115.6(5) | C(24)-C(25)-C(7)     | 120.5(8)  |
| C(16)-C(15)-C(6)    | 120.0(5) | C(24)-C(25)-H(25)    | 119.8     |
| C(15)-C(16)-C(17)   | 118.1(5) | C(7)-C(25)-H(25)     | 119.8     |
| C(15)-C(16)-H(16)   | 121.0    | C(21')-C(7')-C(25')  | 120.1(18) |
| C(17)-C(16)-H(16)   | 121.0    | C(21')-C(7')-C(1)    | 115(3)    |
| C(18)-C(17)-C(16)   | 124.2(5) | C(25')-C(7')-C(1)    | 124(3)    |
| C(18)-C(17)-O(4)    | 124.6(7) | C(7')-C(21')-C(22')  | 119(2)    |
| C(16)-C(17)-O(4)    | 109.1(7) | C(7')-C(21')-H(21')  | 120.6     |
| C(18)-C(17)-O(4')   | 120.1(7) | C(22')-C(21')-H(21') | 120.6     |
| C(16)-C(17)-O(4')   | 114.6(7) | C(23')-C(22')-C(21') | 121(2)    |
| C(17)-C(18)-C(5)    | 115.0(6) | C(23')-C(22')-H(22') | 119.7     |
| C(17)-C(18)-H(18)   | 122.5    | C(21')-C(22')-H(22') | 119.7     |
| C(5)-C(18)-H(18)    | 122.5    | C(24')-C(23')-C(22') | 119(2)    |
| C(15)-O(3)-C(19)    | 116.2(4) | C(24')-C(23')-H(23') | 120.7     |
| O(3)-C(19)-H(19A)   | 109.5    | C(22')-C(23')-H(23') | 120.7     |
| O(3)-C(19)-H(19B)   | 109.5    | C(23')-C(24')-C(25') | 122(2)    |

|                      |           |                   |          |
|----------------------|-----------|-------------------|----------|
| C(23')-C(24')-H(24') | 119.2     | C(57)-C(51)-C(56) | 111.1(5) |
| C(25')-C(24')-H(24') | 119.2     | N(3)-C(51)-C(52)  | 103.7(4) |
| C(24')-C(25')-C(7')  | 119.4(19) | C(57)-C(51)-C(52) | 115.5(5) |
| C(24')-C(25')-H(25') | 120.3     | C(56)-C(51)-C(52) | 99.9(4)  |
| C(7')-C(25')-H(25')  | 120.3     | N(4)-C(52)-C(53)  | 113.5(5) |
| C(26)-C(8)-C(30)     | 119.7(6)  | N(4)-C(52)-C(58)  | 111.2(5) |
| C(26)-C(8)-C(2)      | 119.4(5)  | C(53)-C(52)-C(58) | 114.0(4) |
| C(30)-C(8)-C(2)      | 120.9(5)  | N(4)-C(52)-C(51)  | 103.6(4) |
| C(8)-C(26)-C(27)     | 118.5(6)  | C(53)-C(52)-C(51) | 100.4(5) |
| C(8)-C(26)-H(26)     | 120.7     | C(58)-C(52)-C(51) | 113.3(5) |
| C(27)-C(26)-H(26)    | 120.7     | C(54)-C(53)-C(59) | 119.3(6) |
| C(28)-C(27)-C(26)    | 123.4(6)  | C(54)-C(53)-C(52) | 112.2(5) |
| C(28)-C(27)-H(27)    | 118.3     | C(59)-C(53)-C(52) | 128.4(5) |
| C(26)-C(27)-H(27)    | 118.3     | C(62)-C(54)-C(53) | 122.1(6) |
| C(27)-C(28)-C(29)    | 116.8(6)  | C(62)-C(54)-N(3)  | 127.4(6) |
| C(27)-C(28)-C(31)    | 120.4(7)  | C(53)-C(54)-N(3)  | 110.4(5) |
| C(29)-C(28)-C(31)    | 122.9(7)  | C(68)-C(55)-N(4)  | 127.6(5) |
| C(28)-C(29)-C(30)    | 122.4(7)  | C(68)-C(55)-C(56) | 121.8(5) |
| C(28)-C(29)-H(29)    | 118.8     | N(4)-C(55)-C(56)  | 110.3(5) |
| C(30)-C(29)-H(29)    | 118.8     | C(65)-C(56)-C(55) | 119.5(5) |
| C(29)-C(30)-C(8)     | 119.2(6)  | C(65)-C(56)-C(51) | 128.9(5) |
| C(29)-C(30)-H(30)    | 120.4     | C(55)-C(56)-C(51) | 111.4(5) |
| C(8)-C(30)-H(30)     | 120.4     | O(5)-C(59)-C(60)  | 123.6(6) |
| C(28)-C(31)-H(31A)   | 109.5     | O(5)-C(59)-C(53)  | 116.0(5) |
| C(28)-C(31)-H(31B)   | 109.5     | C(60)-C(59)-C(53) | 120.4(6) |
| H(31A)-C(31)-H(31B)  | 109.5     | C(59)-C(60)-C(61) | 118.5(6) |
| C(28)-C(31)-H(31C)   | 109.5     | C(59)-C(60)-H(60) | 120.8    |
| H(31A)-C(31)-H(31C)  | 109.5     | C(61)-C(60)-H(60) | 120.8    |
| H(31B)-C(31)-H(31C)  | 109.5     | C(62)-C(61)-O(6)  | 124.2(5) |
| C(54)-N(3)-C(51)     | 107.9(5)  | C(62)-C(61)-C(60) | 122.4(6) |
| C(54)-N(3)-H(3)      | 110(3)    | O(6)-C(61)-C(60)  | 113.4(6) |
| C(51)-N(3)-H(3)      | 115(3)    | C(61)-C(62)-C(54) | 117.4(6) |
| C(55)-N(4)-C(52)     | 109.6(5)  | C(61)-C(62)-H(62) | 121.3    |
| C(55)-N(4)-H(4)      | 120(3)    | C(54)-C(62)-H(62) | 121.3    |
| C(52)-N(4)-H(4)      | 111(3)    | C(59)-O(5)-C(63)  | 117.9(5) |
| N(3)-C(51)-C(57)     | 112.4(5)  | O(5)-C(63)-H(63A) | 109.5    |
| N(3)-C(51)-C(56)     | 113.5(5)  | O(5)-C(63)-H(63B) | 109.5    |

|                     |           |                      |           |
|---------------------|-----------|----------------------|-----------|
| H(63A)-C(63)-H(63B) | 109.5     | C(72)-C(71)-C(57)    | 122.9(13) |
| O(5)-C(63)-H(63C)   | 109.5     | C(72)-C(71)-H(71)    | 118.5     |
| H(63A)-C(63)-H(63C) | 109.5     | C(57)-C(71)-H(71)    | 118.5     |
| H(63B)-C(63)-H(63C) | 109.5     | C(73)-C(72)-C(71)    | 120.5(13) |
| C(61)-O(6)-C(64)    | 115.0(5)  | C(73)-C(72)-H(72)    | 119.7     |
| O(6)-C(64)-H(64A)   | 109.5     | C(71)-C(72)-H(72)    | 119.7     |
| O(6)-C(64)-H(64B)   | 109.5     | C(72)-C(73)-C(74)    | 119.8(13) |
| H(64A)-C(64)-H(64B) | 109.5     | C(72)-C(73)-C(81)    | 121.1(11) |
| O(6)-C(64)-H(64C)   | 109.5     | C(74)-C(73)-C(81)    | 119.1(12) |
| H(64A)-C(64)-H(64C) | 109.5     | C(73)-C(74)-C(75)    | 118.1(14) |
| H(64B)-C(64)-H(64C) | 109.5     | C(73)-C(74)-H(74)    | 121.0     |
| O(7)-C(65)-C(66)    | 125.0(5)  | C(75)-C(74)-H(74)    | 121.0     |
| O(7)-C(65)-C(56)    | 115.7(5)  | C(57)-C(75)-C(74)    | 124.8(13) |
| C(66)-C(65)-C(56)   | 119.3(5)  | C(57)-C(75)-H(75)    | 117.6     |
| C(67)-C(66)-C(65)   | 120.1(5)  | C(74)-C(75)-H(75)    | 117.6     |
| C(67)-C(66)-H(66A)  | 119.9     | C(72')-C(71')-H(71') | 119.9     |
| C(65)-C(66)-H(66A)  | 119.9     | C(73')-C(72')-C(71') | 119.3(13) |
| C(66)-C(67)-O(8')   | 113.1(13) | C(73')-C(72')-H(72') | 120.4     |
| C(66)-C(67)-O(8)    | 115.1(6)  | C(71')-C(72')-H(72') | 120.4     |
| C(66)-C(67)-C(68)   | 122.0(5)  | C(72')-C(73')-C(74') | 121.2(12) |
| O(8')-C(67)-C(68)   | 123.8(13) | C(72')-C(73')-H(73') | 119.4     |
| O(8)-C(67)-C(68)    | 122.2(7)  | C(74')-C(73')-H(73') | 119.4     |
| C(55)-C(68)-C(67)   | 117.2(6)  | C(73')-C(74')-C(75') | 119.4(14) |
| C(55)-C(68)-H(68A)  | 121.4     | C(73')-C(74')-H(74') | 120.3     |
| C(67)-C(68)-H(68A)  | 121.4     | C(75')-C(74')-H(74') | 120.3     |
| C(65)-O(7)-C(69)    | 117.0(4)  | C(74')-C(75')-H(75') | 120.2     |
| O(7)-C(69)-H(69A)   | 109.5     | C(80)-C(58)-C(76)    | 115.8(6)  |
| O(7)-C(69)-H(69B)   | 109.5     | C(80)-C(58)-C(52)    | 122.8(5)  |
| H(69A)-C(69)-H(69B) | 109.5     | C(76)-C(58)-C(52)    | 121.3(6)  |
| O(7)-C(69)-H(69C)   | 109.5     | C(77)-C(76)-C(58)    | 123.9(7)  |
| H(69A)-C(69)-H(69C) | 109.5     | C(77)-C(76)-H(76A)   | 118.1     |
| H(69B)-C(69)-H(69C) | 109.5     | C(58)-C(76)-H(76A)   | 118.1     |
| C(67)-O(8)-C(70)    | 117.4(8)  | C(76)-C(77)-C(78)    | 119.0(6)  |
| C(67)-O(8')-C(70')  | 115(2)    | C(76)-C(77)-H(77A)   | 120.5     |
| C(75)-C(57)-C(71)   | 113.6(10) | C(78)-C(77)-H(77A)   | 120.5     |
| C(75)-C(57)-C(51)   | 115.8(8)  | C(79)-C(78)-C(77)    | 119.4(7)  |
| C(71)-C(57)-C(51)   | 130.6(8)  | C(79)-C(78)-C(81')   | 125.4(10) |

|                    |          |                     |          |
|--------------------|----------|---------------------|----------|
| C(77)-C(78)-C(81') | 115.2(9) | C(58)-C(80)-C(79)   | 121.9(6) |
| C(79)-C(78)-H(78)  | 120.3    | C(58)-C(80)-H(80A)  | 119.1    |
| C(77)-C(78)-H(78)  | 120.3    | C(79)-C(80)-H(80A)  | 119.1    |
| C(78)-C(79)-C(80)  | 120.0(7) | C(78)-C(81')-H(81D) | 109.5    |
| C(78)-C(79)-H(79A) | 120.0    | C(78)-C(81')-H(81E) | 109.5    |
| C(80)-C(79)-H(79A) | 120.0    | C(78)-C(81')-H(81F) | 109.5    |

---

**Table S65.** Anisotropic displacement parameters ( $\text{\AA}^2 \times 10^3$ ) for (+/-)-**8**. The anisotropic displacement factor exponent takes the form:  $-2\pi^2 [ h^2 a^{*2} U_{11} + \dots + 2 h k a^* b^* U_{12} ]$

|      | $U_{11}$ | $U_{22}$ | $U_{33}$ | $U_{23}$ | $U_{13}$ | $U_{12}$ |
|------|----------|----------|----------|----------|----------|----------|
| N1   | 31(2)    | 49(4)    | 19(3)    | 8(3)     | -1(2)    | -9(2)    |
| N2   | 26(1)    | 29(1)    | 22(1)    | -1(2)    | 1(1)     | 0(2)     |
| C1   | 26(1)    | 34(1)    | 19(1)    | -3(3)    | 2(1)     | 2(2)     |
| C2   | 24(2)    | 35(3)    | 26(3)    | 6(3)     | -4(2)    | 3(2)     |
| C3   | 24(1)    | 32(1)    | 26(1)    | -2(3)    | 3(1)     | -2(2)    |
| C4   | 22(1)    | 41(1)    | 25(1)    | 3(3)     | 6(1)     | 1(2)     |
| C5   | 25(2)    | 26(3)    | 30(3)    | -4(3)    | 3(2)     | 2(2)     |
| C6   | 25(1)    | 25(1)    | 24(1)    | -1(2)    | 1(1)     | -1(2)    |
| C9   | 27(2)    | 32(3)    | 23(3)    | 3(3)     | 2(2)     | 0(2)     |
| C10  | 31(3)    | 27(3)    | 30(3)    | -1(3)    | 4(2)     | -5(2)    |
| C11  | 27(3)    | 47(4)    | 28(3)    | -4(3)    | 8(2)     | -4(3)    |
| C12  | 25(1)    | 47(1)    | 23(1)    | -3(3)    | 3(1)     | 2(2)     |
| O1   | 37(1)    | 31(1)    | 23(1)    | 0(2)     | 0(1)     | -1(2)    |
| C13  | 56(4)    | 36(4)    | 35(4)    | 9(3)     | 8(3)     | -3(3)    |
| O2   | 43(2)    | 46(3)    | 30(2)    | -4(2)    | 0(2)     | -10(2)   |
| C14  | 89(3)    | 54(3)    | 33(1)    | 0(3)     | -14(2)   | 13(3)    |
| C15  | 31(1)    | 23(1)    | 23(1)    | 1(2)     | 0(1)     | 0(2)     |
| C16  | 35(3)    | 35(3)    | 22(3)    | 6(2)     | 8(2)     | 5(2)     |
| C17  | 39(3)    | 39(4)    | 53(4)    | 19(3)    | 21(3)    | 18(3)    |
| C18  | 33(3)    | 33(3)    | 35(3)    | 13(3)    | 10(2)    | 14(2)    |
| O3   | 37(1)    | 35(1)    | 23(1)    | 0(2)     | 3(1)     | 1(2)     |
| C19  | 49(3)    | 42(4)    | 23(3)    | 9(3)     | 16(3)    | 1(3)     |
| O4   | 31(3)    | 52(6)    | 27(4)    | 7(3)     | 8(3)     | 11(4)    |
| C20  | 38(5)    | 50(6)    | 48(6)    | 7(4)     | 8(4)     | 24(4)    |
| O4'  | 31(3)    | 52(6)    | 27(4)    | 7(3)     | 8(3)     | 11(4)    |
| C20' | 38(5)    | 50(6)    | 48(6)    | 7(4)     | 8(4)     | 24(4)    |
| C7   | 19(6)    | 27(3)    | 20(4)    | 4(3)     | 6(6)     | 6(3)     |
| C21  | 24(6)    | 49(5)    | 35(7)    | 17(4)    | 4(4)     | 16(4)    |
| C22  | 26(5)    | 49(4)    | 45(4)    | 12(4)    | 4(5)     | 20(4)    |
| C23  | 47(8)    | 28(4)    | 33(5)    | 6(3)     | 14(6)    | 15(5)    |
| C24  | 28(6)    | 39(4)    | 37(5)    | -6(4)    | 4(5)     | 5(5)     |
| C25  | 26(6)    | 30(4)    | 25(4)    | -2(3)    | 0(5)     | 7(4)     |
| C7'  | 19(6)    | 27(3)    | 20(4)    | 4(3)     | 6(6)     | 6(3)     |

|      |        |        |       |        |        |        |
|------|--------|--------|-------|--------|--------|--------|
| C21' | 24(6)  | 49(5)  | 35(7) | 17(4)  | 4(4)   | 16(4)  |
| C22' | 26(5)  | 49(4)  | 45(4) | 12(4)  | 4(5)   | 20(4)  |
| C23' | 47(8)  | 28(4)  | 33(5) | 6(3)   | 14(6)  | 15(5)  |
| C24' | 28(6)  | 39(4)  | 37(5) | -6(4)  | 4(5)   | 5(5)   |
| C25' | 26(6)  | 30(4)  | 25(4) | -2(3)  | 0(5)   | 7(4)   |
| C8   | 35(1)  | 31(1)  | 24(1) | -1(3)  | 6(1)   | 0(2)   |
| C26  | 39(1)  | 46(1)  | 38(1) | -7(3)  | 11(1)  | -1(3)  |
| C27  | 50(4)  | 41(4)  | 54(4) | 2(4)   | 26(3)  | 11(3)  |
| C28  | 67(4)  | 28(3)  | 42(4) | -1(3)  | 32(3)  | -3(3)  |
| C29  | 74(2)  | 33(1)  | 32(1) | 1(3)   | 13(1)  | -1(4)  |
| C30  | 45(1)  | 32(1)  | 31(1) | 2(3)   | 9(1)   | 3(3)   |
| C31  | 108(7) | 65(6)  | 89(7) | -16(5) | 63(6)  | -11(5) |
| N3   | 27(2)  | 34(3)  | 28(3) | -4(2)  | 2(2)   | -2(2)  |
| N4   | 26(1)  | 29(1)  | 22(1) | -1(2)  | 1(1)   | 0(2)   |
| C51  | 26(1)  | 34(1)  | 19(1) | -3(3)  | 2(1)   | 2(2)   |
| C52  | 28(2)  | 24(3)  | 19(3) | -1(2)  | 5(2)   | -2(2)  |
| C53  | 24(1)  | 32(1)  | 26(1) | -2(3)  | 3(1)   | -2(2)  |
| C54  | 22(1)  | 41(1)  | 25(1) | 3(3)   | 6(1)   | 1(2)   |
| C55  | 30(2)  | 22(3)  | 19(3) | -2(2)  | 5(2)   | 5(2)   |
| C56  | 25(1)  | 25(1)  | 24(1) | -1(2)  | 1(1)   | -1(2)  |
| C59  | 26(2)  | 36(4)  | 22(3) | 0(3)   | 1(2)   | 2(2)   |
| C60  | 31(3)  | 48(4)  | 24(3) | -1(3)  | 4(2)   | 8(3)   |
| C61  | 26(2)  | 39(4)  | 30(3) | 7(3)   | 3(2)   | 7(3)   |
| C62  | 25(1)  | 47(1)  | 23(1) | -3(3)  | 3(1)   | 2(2)   |
| O5   | 37(1)  | 31(1)  | 23(1) | 0(2)   | 0(1)   | -1(2)  |
| C63  | 65(4)  | 38(4)  | 26(3) | -7(3)  | -8(3)  | 18(3)  |
| O6   | 46(2)  | 54(3)  | 25(2) | 5(2)   | 2(2)   | 23(2)  |
| C64  | 89(3)  | 54(3)  | 33(1) | 0(3)   | -14(2) | 13(3)  |
| C65  | 31(1)  | 23(1)  | 23(1) | 1(2)   | 0(1)   | 0(2)   |
| C66  | 33(3)  | 25(3)  | 32(3) | -1(2)  | 9(2)   | -1(2)  |
| C67  | 30(3)  | 34(3)  | 40(4) | -3(3)  | 12(2)  | -4(2)  |
| C68  | 36(3)  | 31(3)  | 31(3) | -4(3)  | 3(2)   | 2(2)   |
| O7   | 37(1)  | 35(1)  | 23(1) | 0(2)   | 3(1)   | 1(2)   |
| C69  | 56(4)  | 44(4)  | 29(4) | -5(3)  | 5(3)   | -3(3)  |
| O8   | 34(3)  | 31(5)  | 55(4) | -11(4) | 16(3)  | -10(3) |
| C70  | 47(6)  | 77(10) | 79(8) | -49(7) | 30(5)  | -29(6) |
| O8'  | 34(3)  | 31(5)  | 55(4) | -11(4) | 16(3)  | -10(3) |

|      |       |        |       |        |       |        |
|------|-------|--------|-------|--------|-------|--------|
| C70' | 47(6) | 77(10) | 79(8) | -49(7) | 30(5) | -29(6) |
| C57  | 38(3) | 36(4)  | 24(3) | -5(3)  | 12(3) | -8(3)  |
| C71  | 52(6) | 20(7)  | 33(5) | 2(10)  | 9(6)  | 0(6)   |
| C72  | 48(4) | 24(3)  | 51(4) | -1(3)  | 15(3) | -4(3)  |
| C73  | 40(8) | 32(4)  | 28(6) | -6(4)  | 3(5)  | -12(6) |
| C74  | 59(9) | 25(5)  | 21(8) | -14(4) | 5(5)  | -8(5)  |
| C75  | 48(4) | 24(3)  | 51(4) | -1(3)  | 15(3) | -4(3)  |
| C57' | 38(3) | 36(4)  | 24(3) | -5(3)  | 12(3) | -8(3)  |
| C71' | 52(6) | 20(7)  | 33(5) | 2(10)  | 9(6)  | 0(6)   |
| C72' | 48(4) | 24(3)  | 51(4) | -1(3)  | 15(3) | -4(3)  |
| C73' | 40(8) | 32(4)  | 28(6) | -6(4)  | 3(5)  | -12(6) |
| C74' | 59(9) | 25(5)  | 21(8) | -14(4) | 5(5)  | -8(5)  |
| C75' | 48(4) | 24(3)  | 51(4) | -1(3)  | 15(3) | -4(3)  |
| C58  | 35(1) | 31(1)  | 24(1) | -1(3)  | 6(1)  | 0(2)   |
| C76  | 39(1) | 46(1)  | 38(1) | -7(3)  | 11(1) | -1(3)  |
| C77  | 46(3) | 66(5)  | 36(4) | -13(4) | 20(3) | -14(4) |
| C78  | 81(5) | 38(4)  | 39(4) | -15(3) | 27(4) | -23(4) |
| C79  | 74(2) | 33(1)  | 32(1) | 1(3)   | 13(1) | -1(4)  |
| C80  | 45(1) | 32(1)  | 31(1) | 2(3)   | 9(1)  | 3(3)   |
| C81  | 46(5) | 20(4)  | 56(6) | 4(4)   | -8(4) | -8(4)  |
| C81' | 75(9) | 24(6)  | 47(7) | -4(6)  | 43(7) | -1(6)  |

---



**Table S66.** Hydrogen coordinates ( $\times 10^4$ ) and isotropic displacement parameters ( $\text{\AA}^2 \times 10^3$ ) for (+/-)-**8**.

|      | x        | y         | z        | $U_{\text{(eq)}}$ |
|------|----------|-----------|----------|-------------------|
| H1   | 4940(50) | -430(30)  | 730(50)  | 49                |
| H2   | 7160(40) | -1320(30) | 3960(40) | 39                |
| H10  | 4047     | -2826     | 3427     | 35                |
| H12  | 3665     | -1657     | 521      | 38                |
| H13A | 5646     | -2490     | 6054     | 63                |
| H13B | 5452     | -2942     | 4909     | 63                |
| H13C | 4384     | -2557     | 5413     | 63                |
| H14A | 2489     | -3369     | 102      | 90                |
| H14B | 3604     | -2908     | -88      | 90                |
| H14C | 2385     | -2535     | 13       | 90                |
| H16  | 8985     | -642      | -86      | 36                |
| H18  | 9145     | -1463     | 3134     | 40                |
| H19A | 7027     | 483       | -1479    | 56                |
| H19B | 7658     | -262      | -1447    | 56                |
| H19C | 8258     | 390       | -782     | 56                |
| H20A | 11310    | -2178     | 1568     | 68                |
| H20B | 10079    | -2354     | 2012     | 68                |
| H20C | 10859    | -1745     | 2608     | 68                |
| H20D | 11885    | -1575     | 2114     | 68                |
| H20E | 10801    | -1994     | 2522     | 68                |
| H20F | 11079    | -1220     | 2989     | 68                |
| H21  | 4196     | 648       | 1520     | 43                |
| H22  | 4152     | 1863      | 1704     | 48                |
| H23  | 5851     | 2489      | 2252     | 43                |
| H24  | 7492     | 1859      | 2892     | 42                |
| H25  | 7513     | 662       | 2848     | 33                |
| H21' | 4393     | 691       | 1818     | 43                |
| H22' | 4564     | 1911      | 1665     | 48                |
| H23' | 6243     | 2467      | 2446     | 43                |
| H24' | 7820     | 1794      | 3063     | 42                |
| H25' | 7782     | 594       | 2866     | 33                |
| H26  | 3712     | -483      | 3855     | 49                |
| H27  | 2988     | 209       | 5278     | 57                |

|      |          |          |          |     |
|------|----------|----------|----------|-----|
| H29  | 6163     | 827      | 6363     | 55  |
| H30  | 6943     | 127      | 5005     | 43  |
| H31A | 4577     | 1226     | 7386     | 126 |
| H31B | 3453     | 741      | 7290     | 126 |
| H31C | 3515     | 1414     | 6487     | 126 |
| H3   | 120(40)  | 3150(30) | 600(50)  | 44  |
| H4   | 2220(40) | 3840(30) | 4190(40) | 39  |
| H60  | -825     | 5411     | 3416     | 41  |
| H62  | -1255    | 4232     | 517      | 38  |
| H63A | 694      | 5086     | 6019     | 65  |
| H63B | -516     | 5189     | 5289     | 65  |
| H63C | 625      | 5542     | 4874     | 65  |
| H64A | -2611    | 5810     | -7       | 90  |
| H64B | -2811    | 4995     | 215      | 90  |
| H64C | -1619    | 5257     | -223     | 90  |
| H66A | 4139     | 3151     | 5        | 35  |
| H68A | 4266     | 3968     | 3201     | 39  |
| H69A | 2090     | 2090     | -1507    | 64  |
| H69B | 3320     | 2128     | -795     | 64  |
| H69C | 2791     | 2811     | -1428    | 64  |
| H70A | 6914     | 4206     | 2107     | 100 |
| H70B | 6220     | 3752     | 2966     | 100 |
| H70C | 5770     | 4515     | 2585     | 100 |
| H70D | 6407     | 4720     | 1704     | 100 |
| H70E | 6040     | 4237     | 2725     | 100 |
| H70F | 5172     | 4821     | 2187     | 100 |
| H71  | -597     | 1745     | 1553     | 42  |
| H72  | -393     | 546      | 1866     | 48  |
| H74  | 2837     | 840      | 3253     | 42  |
| H75  | 2627     | 2045     | 2910     | 48  |
| H71' | -702     | 2014     | 1604     | 42  |
| H72' | -843     | 784      | 1546     | 48  |
| H73' | 699      | 116      | 2254     | 40  |
| H74' | 2458     | 639      | 2862     | 42  |
| H75' | 2581     | 1877     | 2979     | 48  |
| H76A | -1218    | 3036     | 3826     | 49  |
| H77A | -2028    | 2348     | 5148     | 58  |

|      |       |      |      |    |
|------|-------|------|------|----|
| H78  | -832  | 1679 | 6432 | 62 |
| H79A | 1164  | 1755 | 6388 | 55 |
| H80A | 1957  | 2442 | 5009 | 43 |
| H81A | 819   | -459 | 2137 | 62 |
| H81B | 1428  | -364 | 3397 | 62 |
| H81C | 2183  | -341 | 2321 | 62 |
| H81D | -1712 | 1824 | 7072 | 70 |
| H81E | -578  | 1359 | 7338 | 70 |
| H81F | -1518 | 1137 | 6333 | 70 |

---

**Table S67.** Torsion angles [°] for (+/-)-**8**.

|               |            |                 |           |
|---------------|------------|-----------------|-----------|
| C4-N1-C1-C6   | 84.9(6)    | C18-C5-C6-C1    | 179.0(6)  |
| C4-N1-C1-C7   | -146.5(11) | N2-C5-C6-C1     | -3.7(7)   |
| C4-N1-C1-C7'  | -151(3)    | N1-C1-C6-C5     | -119.0(6) |
| C4-N1-C1-C2   | -23.6(6)   | C7-C1-C6-C5     | 114.9(11) |
| C5-N2-C2-C8   | -146.0(5)  | C7'-C1-C6-C5    | 110(3)    |
| C5-N2-C2-C3   | 86.2(6)    | C2-C1-C6-C5     | -9.3(6)   |
| C5-N2-C2-C1   | -20.8(6)   | N1-C1-C6-C15    | 65.1(8)   |
| N1-C1-C2-N2   | 135.2(5)   | C7-C1-C6-C15    | -61.0(12) |
| C6-C1-C2-N2   | 17.9(6)    | C7'-C1-C6-C15   | -66(3)    |
| C7-C1-C2-N2   | -105.8(7)  | C2-C1-C6-C15    | 174.8(6)  |
| C7'-C1-C2-N2  | -94.1(16)  | C4-C3-C9-O1     | -179.1(5) |
| N1-C1-C2-C8   | -102.9(5)  | C2-C3-C9-O1     | 0.5(9)    |
| C6-C1-C2-C8   | 139.8(5)   | C4-C3-C9-C10    | 1.6(9)    |
| C7-C1-C2-C8   | 16.2(8)    | C2-C3-C9-C10    | -178.8(5) |
| C7'-C1-C2-C8  | 27.8(16)   | O1-C9-C10-C11   | -178.7(5) |
| N1-C1-C2-C3   | 20.6(5)    | C3-C9-C10-C11   | 0.5(9)    |
| C6-C1-C2-C3   | -96.7(5)   | C9-C10-C11-O2   | 179.3(5)  |
| C7-C1-C2-C3   | 139.7(6)   | C9-C10-C11-C12  | -1.6(9)   |
| C7'-C1-C2-C3  | 151.3(16)  | O2-C11-C12-C4   | 179.6(5)  |
| N2-C2-C3-C4   | -120.9(5)  | C10-C11-C12-C4  | 0.5(8)    |
| C8-C2-C3-C4   | 113.1(6)   | C3-C4-C12-C11   | 1.6(8)    |
| C1-C2-C3-C4   | -11.7(6)   | N1-C4-C12-C11   | -178.3(5) |
| N2-C2-C3-C9   | 59.4(8)    | C3-C9-O1-C13    | 179.8(5)  |
| C8-C2-C3-C9   | -66.6(8)   | C10-C9-O1-C13   | -1.0(8)   |
| C1-C2-C3-C9   | 168.6(6)   | C10-C11-O2-C14  | -163.8(5) |
| C9-C3-C4-N1   | 177.2(5)   | C12-C11-O2-C14  | 17.0(9)   |
| C2-C3-C4-N1   | -2.4(7)    | C5-C6-C15-O3    | -177.5(5) |
| C9-C3-C4-C12  | -2.8(9)    | C1-C6-C15-O3    | -1.8(9)   |
| C2-C3-C4-C12  | 177.6(5)   | C5-C6-C15-C16   | 4.9(9)    |
| C1-N1-C4-C3   | 17.5(7)    | C1-C6-C15-C16   | -179.5(6) |
| C1-N1-C4-C12  | -162.6(5)  | O3-C15-C16-C17  | 179.6(6)  |
| C2-N2-C5-C6   | 16.2(7)    | C6-C15-C16-C17  | -3.0(9)   |
| C2-N2-C5-C18  | -166.5(6)  | C15-C16-C17-C18 | 0.9(11)   |
| C18-C5-C6-C15 | -4.7(9)    | C15-C16-C17-O4  | 165.2(7)  |
| N2-C5-C6-C15  | 172.7(5)   | C15-C16-C17-O4' | -167.4(8) |

|                     |            |                    |           |
|---------------------|------------|--------------------|-----------|
| C16-C17-C18-C5      | -0.5(11)   | C21'-C7'-C25'-C24' | -3(11)    |
| O4-C17-C18-C5       | -162.4(8)  | C1-C7'-C25'-C24'   | -178(5)   |
| O4'-C17-C18-C5      | 167.1(8)   | N2-C2-C8-C26       | -155.0(6) |
| C6-C5-C18-C17       | 2.5(10)    | C3-C2-C8-C26       | -29.2(8)  |
| N2-C5-C18-C17       | -174.6(6)  | C1-C2-C8-C26       | 86.9(7)   |
| C16-C15-O3-C19      | -8.5(9)    | N2-C2-C8-C30       | 27.0(8)   |
| C6-C15-O3-C19       | 174.0(5)   | C3-C2-C8-C30       | 152.9(6)  |
| C18-C17-O4-C20      | -6.9(14)   | C1-C2-C8-C30       | -91.0(7)  |
| C16-C17-O4-C20      | -171.1(9)  | C30-C8-C26-C27     | 0.3(10)   |
| C18-C17-O4'-C20'    | 0.8(15)    | C2-C8-C26-C27      | -177.6(6) |
| C16-C17-O4'-C20'    | 169.5(10)  | C8-C26-C27-C28     | 0.4(11)   |
| N1-C1-C7-C21        | 12(3)      | C26-C27-C28-C29    | -0.2(11)  |
| C6-C1-C7-C21        | 140(2)     | C26-C27-C28-C31    | 179.5(7)  |
| C2-C1-C7-C21        | -103(2)    | C27-C28-C29-C30    | -0.8(10)  |
| N1-C1-C7-C25        | -165.2(17) | C31-C28-C29-C30    | 179.5(7)  |
| C6-C1-C7-C25        | -37(2)     | C28-C29-C30-C8     | 1.5(10)   |
| C2-C1-C7-C25        | 79(2)      | C26-C8-C30-C29     | -1.3(10)  |
| C25-C7-C21-C22      | -3(4)      | C2-C8-C30-C29      | 176.7(6)  |
| C1-C7-C21-C22       | -179.7(18) | C54-N3-C51-C57     | 149.1(5)  |
| C7-C21-C22-C23      | 5(3)       | C54-N3-C51-C56     | -83.7(6)  |
| C21-C22-C23-C24     | -5(3)      | C54-N3-C51-C52     | 23.7(6)   |
| C22-C23-C24-C25     | 2(3)       | C55-N4-C52-C53     | -84.8(6)  |
| C23-C24-C25-C7      | 0(3)       | C55-N4-C52-C58     | 145.2(5)  |
| C21-C7-C25-C24      | 0(4)       | C55-N4-C52-C51     | 23.1(6)   |
| C1-C7-C25-C24       | 177.3(18)  | N3-C51-C52-N4      | -136.6(5) |
| N1-C1-C7'-C21'      | 21(7)      | C57-C51-C52-N4     | 100.0(6)  |
| C6-C1-C7'-C21'      | 148(6)     | C56-C51-C52-N4     | -19.2(6)  |
| C2-C1-C7'-C21'      | -102(6)    | N3-C51-C52-C53     | -19.2(5)  |
| N1-C1-C7'-C25'      | -164(5)    | C57-C51-C52-C53    | -142.6(5) |
| C6-C1-C7'-C25'      | -36(7)     | C56-C51-C52-C53    | 98.2(5)   |
| C2-C1-C7'-C25'      | 73(7)      | N3-C51-C52-C58     | 102.8(5)  |
| C25'-C7'-C21'-C22'  | 10(11)     | C57-C51-C52-C58    | -20.7(7)  |
| C1-C7'-C21'-C22'    | -175(5)    | C56-C51-C52-C58    | -139.9(5) |
| C7'-C21'-C22'-C23'  | -11(10)    | N4-C52-C53-C54     | 118.8(5)  |
| C21'-C22'-C23'-C24' | 5(9)       | C58-C52-C53-C54    | -112.5(6) |
| C22'-C23'-C24'-C25' | 2(9)       | C51-C52-C53-C54    | 8.9(6)    |
| C23'-C24'-C25'-C7'  | -3(10)     | N4-C52-C53-C59     | -58.4(8)  |

|                 |           |                     |            |
|-----------------|-----------|---------------------|------------|
| C58-C52-C53-C59 | 70.3(8)   | C51-C56-C65-O7      | 0.7(9)     |
| C51-C52-C53-C59 | -168.3(6) | C55-C56-C65-C66     | -1.7(9)    |
| C59-C53-C54-C62 | -0.2(8)   | C51-C56-C65-C66     | -177.1(6)  |
| C52-C53-C54-C62 | -177.7(5) | O7-C65-C66-C67      | -178.3(6)  |
| C59-C53-C54-N3  | -176.8(5) | C56-C65-C66-C67     | -0.7(9)    |
| C52-C53-C54-N3  | 5.7(6)    | C65-C66-C67-O8'     | -165.1(14) |
| C51-N3-C54-C62  | 164.3(5)  | C65-C66-C67-O8      | 173.8(7)   |
| C51-N3-C54-C53  | -19.3(6)  | C65-C66-C67-C68     | 3.2(10)    |
| C52-N4-C55-C68  | 168.5(6)  | N4-C55-C68-C67      | 174.0(6)   |
| C52-N4-C55-C56  | -17.6(7)  | C56-C55-C68-C67     | 0.7(9)     |
| C68-C55-C56-C65 | 1.7(9)    | C66-C67-C68-C55     | -3.1(10)   |
| N4-C55-C56-C65  | -172.7(5) | O8'-C67-C68-C55     | 163.8(16)  |
| C68-C55-C56-C51 | 177.9(6)  | O8-C67-C68-C55      | -173.1(8)  |
| N4-C55-C56-C51  | 3.5(7)    | C66-C65-O7-C69      | 3.0(8)     |
| N3-C51-C56-C65  | -64.2(8)  | C56-C65-O7-C69      | -174.7(5)  |
| C57-C51-C56-C65 | 63.6(8)   | C66-C67-O8-C70      | -170.6(9)  |
| C52-C51-C56-C65 | -174.0(6) | C68-C67-O8-C70      | 0.1(12)    |
| N3-C51-C56-C55  | 120.0(5)  | C66-C67-O8'-C70'    | 169(2)     |
| C57-C51-C56-C55 | -112.1(6) | C68-C67-O8'-C70'    | 1(3)       |
| C52-C51-C56-C55 | 10.2(6)   | N3-C51-C57-C75      | 167(2)     |
| C54-C53-C59-O5  | -177.5(5) | C56-C51-C57-C75     | 39(2)      |
| C52-C53-C59-O5  | -0.5(9)   | C52-C51-C57-C75     | -74(2)     |
| C54-C53-C59-C60 | 0.2(9)    | N3-C51-C57-C71      | -12(3)     |
| C52-C53-C59-C60 | 177.2(5)  | C56-C51-C57-C71     | -140(3)    |
| O5-C59-C60-C61  | 177.0(5)  | C52-C51-C57-C71     | 107(3)     |
| C53-C59-C60-C61 | -0.5(9)   | C75-C57-C71-C72     | 2(6)       |
| C59-C60-C61-C62 | 0.8(9)    | C51-C57-C71-C72     | -179(2)    |
| C59-C60-C61-O6  | -178.6(5) | C57-C71-C72-C73     | -3(6)      |
| O6-C61-C62-C54  | 178.5(5)  | C71-C72-C73-C74     | 5(4)       |
| C60-C61-C62-C54 | -0.9(9)   | C71-C72-C73-C81     | -175(3)    |
| C53-C54-C62-C61 | 0.6(8)    | C72-C73-C74-C75     | -5(3)      |
| N3-C54-C62-C61  | 176.5(5)  | C81-C73-C74-C75     | 175(2)     |
| C60-C59-O5-C63  | 3.4(8)    | C71-C57-C75-C74     | -2(5)      |
| C53-C59-O5-C63  | -179.0(6) | C51-C57-C75-C74     | 178(3)     |
| C62-C61-O6-C64  | 0.2(8)    | C73-C74-C75-C57     | 4(5)       |
| C60-C61-O6-C64  | 179.6(5)  | C71'-C72'-C73'-C74' | -2(4)      |
| C55-C56-C65-O7  | 176.2(5)  | C72'-C73'-C74'-C75' | 4(3)       |

|                 |           |                  |           |
|-----------------|-----------|------------------|-----------|
| N4-C52-C58-C80  | -24.4(8)  | C58-C76-C77-C78  | -0.2(11)  |
| C53-C52-C58-C80 | -154.2(6) | C76-C77-C78-C79  | 1.0(11)   |
| C51-C52-C58-C80 | 91.8(7)   | C76-C77-C78-C81' | 179.8(8)  |
| N4-C52-C58-C76  | 158.7(6)  | C77-C78-C79-C80  | -1.7(10)  |
| C53-C52-C58-C76 | 28.9(8)   | C81'-C78-C79-C80 | 179.6(8)  |
| C51-C52-C58-C76 | -85.1(7)  | C76-C58-C80-C79  | -0.6(9)   |
| C80-C58-C76-C77 | -0.1(10)  | C52-C58-C80-C79  | -177.6(6) |
| C52-C58-C76-C77 | 177.0(6)  | C78-C79-C80-C58  | 1.5(10)   |

**Table S68.** Hydrogen bonds and close contacts for (+/-)-**8** [Å and °].

| D-H...A       | d(D-H)  | d(H...A) | d(D...A)  | <(DHA) |
|---------------|---------|----------|-----------|--------|
| N1-H1...O3    | 0.84(6) | 2.70(6)  | 3.177(6)  | 117(4) |
| N1-H1...O8#1  | 0.84(6) | 2.91(6)  | 3.542(12) | 133(5) |
| N1-H1...O8'#1 | 0.84(6) | 2.54(6)  | 3.22(3)   | 138(5) |
| N2-H2...O1    | 0.90(6) | 2.52(6)  | 3.056(6)  | 119(4) |
| N3-H3...O7    | 0.97(5) | 2.65(5)  | 3.190(6)  | 115(4) |
| N3-H3...O4#2  | 0.97(5) | 2.12(5)  | 3.043(10) | 158(5) |
| N3-H3...O4'#2 | 0.97(5) | 2.63(5)  | 3.502(11) | 149(4) |
| N4-H4...O5    | 0.97(6) | 2.45(5)  | 3.078(6)  | 122(4) |

Symmetry transformations used to generate equivalent atoms:

#1 -x+1,y-1/2,-z #2 -x+1,y+1/2,-z
